1 Antagonism of the azoles to olorofim and cross-resistance are governed by linked  
2 transcriptional networks in *Aspergillus fumigatus*

3  
4 **Authors:** Norman van Rhijn<sup>1,2</sup>, Sam Hemmings<sup>1</sup>, Isabelle S. R. Storer<sup>1</sup>, Clara Valero<sup>1,3</sup>,  
5 Hajer Alshammri<sup>1</sup>, Gustavo H. Goldman<sup>3</sup>, Fabio Gsaller<sup>1,4</sup>, Jorge Amich<sup>1,5</sup>, Michael J  
6 Bromley<sup>1,2</sup>

7 <sup>1</sup> Manchester Fungal Infection Group, Division of Evolution, Infection, and Genomics, Faculty of Biology,  
8 Medicine and Health, University of Manchester, CTF Building, 46 Grafton Street, Manchester, M13 9NT, UK.

9 <sup>2</sup> Antimicrobial Resistance Network, University of Manchester, Manchester M13 9PT, UK

10  
11 <sup>3</sup> Faculdade de Ciências Farmacêuticas de Ribeirão Preto, Departamento de Ciências Farmacêuticas,  
12 Universidade de São Paulo, Avenida do Café S/N, Ribeirão Preto 14040-903, Brazil.

13 <sup>4</sup> Institute of Molecular Biology/Biocenter, Innsbruck Medical University, Innsbruck, Austria

14 <sup>5</sup> Mycology Reference Laboratory, National Centre for Microbiology, Instituto de Salud Carlos III (ISCIII),  
15 Majadahonda, 28222 Madrid, Spain.

16

17

18 \*To whom correspondence should be addressed:

19 Michael J Bromley, Phone: (+44) (0)161 275 1703, email:  
20 mike.bromley@manchester.ac.uk

21 **Keywords:** *Aspergillus fumigatus*, Olorofim, Orotomide, Antimicrobial resistance,  
22 Antifungal, Transcription factor, Aspergillosis, Antagonism, Metabolism, Metabolic  
23 rewiring

24

25 **Abstract:**

26 Aspergillosis, in its various manifestations, is a major cause of morbidity and mortality. Very  
27 few classes of antifungal drugs have been approved for clinical use to treat these diseases and  
28 resistance to the first line therapeutic class, the triazoles, is increasing. A new class of  
29 antifungals that target pyrimidine biosynthesis, the orotomides, are currently in development  
30 with the first compound in this class, olorofim in late-stage clinical trials. In this study, we  
31 identify an antagonistic action of the triazoles on the action of olorofim. We show that this  
32 antagonism is the result of an azole induced upregulation of the pyrimidine biosynthesis  
33 pathway and regulation. Intriguingly, we show that loss of function in the higher order  
34 transcription factor, HapB a member of the heterotrimeric HapB/C/E (CBC) complex or the  
35 regulator of nitrogen metabolic genes AreA, leads to cross resistance to both the azoles and  
36 olorofim indicating that factors that govern resistance are under common regulatory control.  
37 However loss of azole induced antagonism requires decoupling of the pyrimidine  
38 biosynthetic pathway in a manner independent of the action of a single transcription factor.  
39 Our study provides a first insight into antagonism between the azoles and olorofim through  
40 dysregulation of the pyrimidine and ergosterol pathway, showing complex crosstalk between  
41 these two pathways.

42

43 **Introduction:**

44 Invasive and chronic forms of aspergillosis affect over 3 million people resulting in excess of  
45 300 thousand deaths per year [1]. Only three classes of antifungals are currently available to  
46 treat aspergillosis, with the triazoles used as first-line therapy in most centres [2]. Resistance  
47 to the azoles is rising, which is linked to use of triazole compounds in agri- and horticulture  
48 [3, 4]. It is predicted that more resistant *A. fumigatus* will be seen as azole use will be  
49 expanded to combat climate change-associated to increasing fungal crop damage [5]. The  
50 development of novel classes of antifungals will be a key component to addressing the  
51 emerging resistance problem. Fortunately, there are a number of drugs that represent novel  
52 classes of antifungal currently in development for treatment of invasive aspergillosis (IA)  
53 including ibrexafungerp, which has recently (2021) gained FDA approval for treatment of  
54 vulvovaginal candidiasis, fosmanogepix which targets GPI anchor biosynthesis and olorofim  
55 (phase 3) [6]. Olorofim (formerly known as F901318 and under development by F2G, Ltd.)  
56 is of particular interest as like fosmanogepix, it has a novel mechanism of action that has not  
57 been exploited clinically [7]. As olorofim is orally bioavailable it presents a realistic  
58 alternative to the azoles for long-term treatment of chronic and allergic infections and  
59 especially resistant infections [8]. Moreover, it could potentially be used in combination  
60 therapy strategies to suppress the emergence of resistance.

61

62 Olorofim acts by inhibiting the enzyme dihydroorotate dehydrogenase (DHODH), encoded  
63 by the *pyrE* gene in *A. fumigatus*, which is a crucial enzyme within the pyrimidine  
64 biosynthesis pathway and is thus required for both DNA and RNA synthesis [7]. Structural  
65 and biochemical analysis of DHODH suggests olorofim competes with CoQ to bind to  
66 DHODH, preventing the oxidation of dihydroorotate to orotate. DHODHs are grouped into 2  
67 classes according to sequence similarity and subcellular localisation. Both mammals and

68 most fungi have class 2 DHODH, which is bound to the inner mitochondrial membrane [9].  
69 The human DHODH only shares 30% protein sequence identity with the *A. fumigatus*  
70 DHODH and olorofim has also been demonstrated to be >2,200-fold more potent against the  
71 *A. fumigatus* enzyme [7]. Inhibition of the pyrimidine biosynthesis pathway by olorofim  
72 prevents the germination of *A. fumigatus* conidia and causes hyphae to undergo  
73 morphological changes [10]. Prolonged exposure of germlings and vegetative hyphae to  
74 olorofim also causes extensive isotropic expansion that is then followed by cell lysis [11].

75

76 Olorofim has an effect on a wide range of fungi and has been shown to be effective against  
77 *Coccidioides immitis*, *Scedosporium* spp., *Madurella mycetomatis*, *Lomentospora prolificans*  
78 and several *Aspergillus* species [12-18]. However, olorofim has a reduced activity against  
79 *Fusarium solani* species complex and *Fusarium dimerum* and is inactive against Mucorales  
80 [19]. Olorofim is also effective against triazole resistant *A. fumigatus* isolates and cryptic  
81 *Aspergillus* species [20, 21]. In several murine models of aspergillosis, olorofim treatment  
82 significantly reduced fungal burden and mortality [15]. Reassuringly, a recent study suggests  
83 that levels of resistance to olorofim in a collection of clinical isolates of *A. fumigatus* is low.  
84 Only 1 of 976 clinical isolates exhibited pre-existing olorofim resistance caused by a single  
85 SNP in the *pyrE* gene [22].

86

87 In this study, we identify a concerning antagonistic effect of the triazoles on the action of  
88 olorofim in *A. fumigatus*. We show that this antagonistic effect is governed by an azole  
89 induced upregulation of the pyrimidine biosynthetic pathway. However, it does not appear to  
90 be regulated by the action of a single transcription factor. Through screening the COFUN *A.*  
91 *fumigatus* transcription factor null mutant library we identify four transcription factors that  
92 regulate susceptibility to olorofim [23]. Existing published literature, and our phenotypic and

93 transcriptomic data revealed these transcription factors regulate genes involved in processes  
94 immediately upstream of the pyrimidine biosynthesis pathway. Notably two transcription  
95 factor null mutants,  $\Delta hapB$  and  $\Delta areA$ , have elevated MICs to olorofim and are resistant to  
96 the azole class of antifungals, highlighting potential routes to cross resistance.  
97

98 **Materials and Methods:**

99 *Fungal strains*

100 Conidia of *Aspergillus fumigatus* MFIG001 (a derivative of CEA10) and transcription factor  
101 null mutants [23, 24] were prepared by inoculating strains in vented 25cm<sup>2</sup> tissue culture  
102 flasks with Sabouraud Dextrose agar (Oxoid, Hampshire, England) and incubating at 37°C  
103 for 48 hours. Spores were harvested in PBS + 0.01% Tween-20 by filtration through  
104 Miracloth. Spores were counted using a haemocytometer (Marienfeld Superior, Baden-  
105 Württemberg, Germany).

106 *Olorofim MIC screening*

107 Olorofim was a kind gift of F2G Ltd. The Minimum Inhibitory Concentration (MIC) of  
108 olorofim against *A. fumigatus* was assessed using the European Committee for Antimicrobial  
109 Susceptibility Testing (EUCAST) methodology [19, 25]. Briefly, 2x10<sup>4</sup> spores/mL (in 100  
110 µl) were added to a CytoOne<sup>®</sup> 96-well plate (StarLab, Brussels, Belgium) containing  
111 1xRPMI-1640 medium (Sigma Aldrich, St. Louis, MO), 165 mM MOPS buffer (pH 7.0), 2%  
112 glucose, with olorofim 2-fold dilution series ranging from 0.1 µg/L to 0.25 mg/L and a drug  
113 free control (n = 4). Additionally, a serial dilution of olorofim containing 10 mM uracil and  
114 uridine was performed. 96-well plates were incubated at 37°C for 48 hours. The MIC was  
115 determined as the minimum drug concentration at which no germination was observed.  
116 Optical density was measured at 600 nm using a Synergy™ HTX Multi-Mode Microplate  
117 Reader (BioTek, Winooski, VT). In keeping with research laboratory based definitions, but in  
118 contract to definitions used clinically, we define *in vitro* resistance as a strain that is less  
119 susceptible to drug than the parental isolate [26].

120 *Olorofim sensitivity screening of the A. fumigatus transcription factor null mutant library*

121 2x10<sup>4</sup> spores/mL from each of the 484 members of the transcription knockout library were  
122 added to 1x RPMI-1640 medium, 165 mM MOPS buffer (pH 7.0), 2% glucose in each well

123 of a CytoOne<sup>®</sup> 96-well plate with 0.002 mg/L olorofim (n = 4). Plates were incubated at 37°C  
124 for 48 hours. Fitness was calculated by dividing the optical density of respective null mutants  
125 to the MFIG001 control. Relative fitness in olorofim was calculated by dividing fitness in  
126 olorofim with general growth fitness of the transcription factor null mutants using the same  
127 microculture conditions in 1x RPMI-1640 medium, 165 mM MOPS buffer (pH 7.0), 2%  
128 glucose without olorofim (n = 4). Optical density was measured at 600 nm on a Synergy™  
129 HTX Multi-Mode Microplate Reader (BioTek, Winooski, VT).

### 130 *RNA-extraction*

131  $1 \times 10^6$  spores/mL of *A. fumigatus* MFIG001,  $\Delta AFUB_{056620}$  and  $\Delta AFUB_{030440}$  were  
132 inoculated into 50 mL of *Aspergillus* complete media (ACM) [27] and incubated for 18 hours  
133 at 37°C in a rotary shaker (180 rpm). Mycelia were harvested using filtration through  
134 Miracloth (Merck Millipore) and washed in 1x RPMI-1640 medium. Approximately 1g of  
135 mycelia was added to shake flasks containing 50 mL RPMI-1640 medium, 165 mM MOPS  
136 buffer (pH 7.0), 2% glucose and incubated for 1 hour at 37°C in a rotary shaker (180rpm) in  
137 the presence or absence of 0.062 mg/L olorofim (n = 3), or in the presence or absence of 0.25  
138 mg/L, 0.5 mg/L, 1 mg/L or 2 mg/L itraconazole (n=3) incubated for 4 hours. Mycelia was  
139 filtered through Miracloth and snapfrozen using liquid nitrogen and kept at -80°C until  
140 required.

141 To extract RNA, 1 mL of TRIzol reagent (Sigma Aldrich) and 710-1180  $\mu$ m acid washed  
142 glass beads (Sigma Aldrich) were added to frozen mycelia and placed in a TissueLyser II<sup>®</sup>  
143 (Qiagen, Hilden, Germany) for 3 minutes at 30 Hz. The solution was centrifuged (12,000  
144 rpm) for 1 minute at 4°C. The aqueous phase was added to 200  $\mu$ L of chloroform and  
145 centrifuged (12,000 rpm) for 10 minutes at room temperature. The supernatant was added to  
146 0.2 M sodium citrate, 0.3 M sodium chloride and 25% (v/v) isopropanol and left at room  
147 temperatures for 10 minutes. This solution was centrifuged (12,000 rpm) for 15 minutes at

148 4°C. The supernatant was removed; the pellet was washed in 70% (v/v) ethanol and  
149 resuspended in RNase free water (Thermo Fisher Scientific, Waltham, MA). RNA samples  
150 were treated with RQ1 RNase-Free DNase (Promega, Madison, WI) and purified using a  
151 RNeasy Mini Kit (Qiagen). RNA quality and quantity were assessed using gel electrophoresis  
152 and using a NanoDrop<sup>TM</sup> 2000/2000c Spectrophotometer (Thermo Fisher Scientific). All  
153 RNA extractions were carried out in triplicate.

#### 154 *Transcriptomic Analysis*

155 RNA sequencing was carried out by the Genomic Technologies Core Facility (GTCF) at The  
156 University of Manchester. Sequencing libraries were prepared from mRNA using TruSeq<sup>®</sup>  
157 Stranded mRNA assay (Illumina, San Diego, CA). Samples were sequenced on a single lane  
158 on an Illumina HiSeq2500 (Illumina). Low-quality reads of resulting fastq files were  
159 removed using FastQC and trimmed using Trimmomatic (Quality >20, Sliding window  
160 average of 4 bases) [28]. Bowtie was used to align libraries to the *A. fumigatus* A1163  
161 genome assembly GCA\_000150145.1 with gene annotation from CADRE/Ensembl Fungi  
162 v24 [29]. Differential expression analysis of was performed using DESeq2 [30].

163 Functional category and gene ontology enrichment analysis was carried out using FungiFun2  
164 2.2.8, converting genes to Af293 gene names to allow using the KEGG option [31]. Genes  
165 that showed over 2-fold in differential expression and Benjamin-Hochberg FDR <0.01  
166 underwent enrichment analysis. StringsDB analysis was performed by only including genes  
167 with at least two connections.

#### 168 *Phenotypic analysis*

169 For colony images, 500 spores per isolate were spotted onto solid ACM or Aspergillus  
170 Minimal Media (AMM) and left to dry. Plates were incubated at 37°C for 72 hours and  
171 imaged. Growth on solid AMM supplemented with different nitrogen sources (50 mM  
172 ammonium tartrate, 10 mM sodium nitrate, 10 mM L-glutamine, 10 mM urea or 10 mM L-



173 proline) were assessed by spotting 500 spores from each isolate (n = 3). Plates were  
174 incubated at 37°C for 72 hours. MICs were determined using the same supplementation as  
175 the phenotypic test with a serial dilution of olorofim (ranging from 0.1 µg/L to 0.25 mg/L).  
176 96-well plates were incubated for 48 hours at 37°C and growth was determined by  
177 microscopic evaluation.

#### 178 *Checkerboard assays*

179 For assessing drug combination efficacies of itraconazole and olorofim against *A. fumigatus*,  
180 we used a checkerboard assay similar to EUCAST MIC testing described above. Twofold  
181 serial dilutions of itraconazole were prepared across the X-axis and olorofim serial dilutions  
182 across the Y-axis. The MIC was determined by microscopy by visually assessing the well  
183 containing the lowest drug concentration with non-germinated spores. The fractional  
184 inhibitory concentration index (FICI) was calculated as the MIC in combination divided by  
185 the MIC of individual drugs [32].

#### 186 *Generation of TetOFF mutants*

187 The tetOFF cassette was amplified from pSK606 [33] containing 50 bp homology arms  
188 targeted to the promoter of each target gene (Supplementary Table 1). These PCR products  
189 were used as repair template for CRISPR-Cas9 mediated transformation [34] using  
190 corresponding crRNA for each gene (Supplementary Table 1). Transformants were selected  
191 using pyrithiamine (concentration) containing AMM+1% sorbitol plates, purified twice and  
192 validated by PCR.

#### 193 *Disk assays*

194  $4 \times 10^4$  conidia of the relevant *A. fumigatus* strain were evenly distributed on solidified  
195 1xRPMI 1640 (Sigma), 165 mM MOPS buffer (pH 7.0), 2% glucose. One 6 mm antibiotic  
196 assay disk (Whatman) was placed on the middle of the plate or two disks at a fixed distance,  
197 and 10 µL of voriconazole (800 mg/L), olorofim (500 mg/L), manogepix (250 mg/L) or H<sub>2</sub>O<sub>2</sub>

198 (30%) were added to each of them. The plates were incubated at 37°C for 48 hours and  
199 imaged. Antagonism was measured as the area within the halo when two antifungals are  
200 combined showing fungal growth. Measurements were done using FIJI.

201

#### 202 *Data availability*

203 RNA-seq data is available from ArrayExpress as experiment: E-MTAB-10590. The  
204 differential expression output from DESeq2 is included as Supplementary Data 1. (reviewer  
205 access: Reviewer\_E-MTAB-10590 Password: pptwwqmj). Itraconazole RNA-seq is available  
206 from GEO: PRJNA861909

207

#### 208 *Acknowledgements*

209 The authors would like to thank F2G for supplying the antifungal olorofim. We would also  
210 like to thank the Genomic Technology Core Facility, the Bioinformatics Core Facility in the  
211 University of Manchester for their technical support. This work was supported by the  
212 Wellcome Trust grant number 219551/Z/19/Z and 208396/Z/17/Z to M.B. CV is funded by  
213 postdoctoral fellowship from Fundação de Amparo à Pesquisa do Estado de São Paulo  
214 (FAPESP-BEPE 2020/01131-5).

215

#### 216 *Competing interests*

217 Michael Bromley is a former employee of F2G Ltd. F2G currently funds a PhD position in  
218 the laboratory. F2G was not involved in any of the experimentation or analysis of data in this  
219 study.

220

#### 221 *Author contributions*

222 N.v.R designed and performed the experiments, analysis, wrote and edited the manuscript.  
223 S.H. designed and performed experiments and analysis. I.S. designed and performed  
224 experiments and analysis. C.V. designed and performed experiments and analysis. H.A.  
225 designed and performed experiments and analysis. G.G. provided funding and edited the  
226 manuscript. F.G. designed and performed experiments and analysis. J.A. designed and  
227 performed experiments and analysis. M.B. provided funding, designed the experiments,  
228 wrote and edited the manuscript  
229

230 **Results:**

231 *The azoles are antagonistic to the action of olorofim in a manner consistent with azole*  
232 *mediated upregulation of the pyrimidine biosynthetic pathway*

233 In order to standardise assays throughout our experiments, the Minimum Inhibitory  
234 Concentration (MIC) of olorofim against *Aspergillus fumigatus* MFIG001 was determined.  
235 The MIC was defined as the minimum concentration of olorofim at which no germination  
236 from *Aspergillus* spores was observed. Microscopic evaluation revealed the MIC of olorofim  
237 to be 0.06 mg/L for *A. fumigatus* MFIG001, consistent with previous findings of other *A.*  
238 *fumigatus* isolates [20]. The effect of olorofim on growth of *A. fumigatus* was further  
239 evaluated by measuring optical density of the plates used to determine the MIC (**Figure 1a**).  
240 The maximal growth observed ( $OD_{600} = 0.39$ ) and minimal growth observed ( $OD_{600} = 0.04$ )  
241 was separated by a 64-fold difference in drug concentration, showing the effect of olorofim is  
242 progressive over a long range of concentrations until achieving total growth inhibition. This  
243 is in stark contrast to the inhibitory effects of the azoles on *A. fumigatus* where the difference  
244 between maximal and minimal growth typically occurs over a drug concentration not  
245 exceeding 8-fold (**Supplemental Figure 1**). As this range is so broad, we consider it useful to  
246 measure the concentration at which growth is inhibited by 50% (herein referred to as IC<sub>50</sub>  
247 [35] to distinguish from MIC<sub>50</sub> which is an MIC determination made of populations). For  
248 MFIG001, the IC<sub>50</sub> for olorofim is 0.0057 mg/L whereas for itraconazole its 0.21 mg/L. As  
249 olorofim inhibits pyrimidine biosynthesis, it would be expected that the action of the drug  
250 would be fully reversed by supplementing the media with an excess of exogenous  
251 pyrimidines [7]. To confirm growth inhibition was due to directly targeting the pyrimidine  
252 biosynthesis pathway, the MIC was determined with the addition of 10 mM uridine and 10  
253 mM uracil (**Figure 1b**). Under these conditions there was no observed reduction in *A.*

254 *fumigatus* growth, and at all olorofim concentrations the median OD<sub>600</sub> did not fall below  
255 control levels indicating that there are no significant off target effects of this drug.

256 Resistance to the clinical azoles has become a global problem that is being addressed in  
257 multiple centres by using combination therapy with either an echinocandin or amphotericin  
258 B. If approved for use, olorofim may be used in the same way. We therefore investigated the  
259 potential interaction in activity between the triazoles; voriconazole and itraconazole, and  
260 olorofim against CEA10, MFIG001 and a TR34 L98H azole-resistant isolate generated in the  
261 MFIG001 background [36]. To our surprise given the distinct mechanisms of action of the  
262 orotomides and the azoles, we observed a clear uni-directional antagonism by the azoles on  
263 olorofim in both liquid and solid media (**Figure 1c and d**). Interestingly we did not see the  
264 same antagonism between olorofim and manogepix, another late stage antifungal compound  
265 (**Supplemental Figure 2**). The antagonism of the azoles to olorofim was also observed under  
266 non-growth inhibitory concentrations of voriconazole for the TR34 L98H azole-resistant  
267 isolate, showing that this antagonistic response is independent of the azole antifungal activity  
268 (**Figure 1e**).

269

270 To gain an understanding of the potential mechanisms driving this antagonism, we evaluated  
271 transcriptomic data for *A. fumigatus* MFIG001 exposed to increasing concentrations of  
272 itraconazole (**Figure 1f**). As expected, the ergosterol biosynthetic pathway was differentially  
273 regulated throughout itraconazole concentrations. At sub-MIC levels of itraconazole we  
274 observed a significant upregulation of genes in the pyrimidine biosynthetic pathway and  
275 those pathways that generate its precursors (**Supplemental Data 1**). Most strikingly, the  
276 nitrate assimilation pathway, *glt1* and the first three steps in the pyrimidine pathway (encoded  
277 by *glnA*-AFUB\_070010, *pyrD*-AFUB\_085720 and *pyrABCN*-AFUB\_077330 and its  
278 orthologues AFUB\_025880 and AFUB\_054340) were upregulated in sub-MIC levels of

279 itraconazole (**Figure 1e**); interestingly many of these genes were downregulated in supra-  
280 MIC concentrations of itraconazole suggesting metabolic arrest [37]. This led us to  
281 hypothesise that both the pyrimidine pathway and ergosterol biosynthesis pathways are  
282 potentially co-regulated.

283

#### 284 ***Deletion of HapB, AreA, DevR and AcdX changes olorofim susceptibility.***

285 As we observed antagonism between the azoles and olorofim, and co-regulation of those  
286 pathways upon azole exposure, we hypothesised that both pathways may be co-regulated by  
287 the same transcription factors. To assess this co-regulation and identify novel transcriptional  
288 regulators associated with differential olorofim susceptibility and azole antagonism, the  
289 COFUN transcription factor knockout (TFKO) library was screened against olorofim at a  
290 concentration that reduces growth of the isogenic wildtype isolate (MFIG001) by about 20%  
291 (0.002 mg/L). At this concentration we were able to identify strains that have the potential to  
292 be resistant or hypersensitive (**Figure 2a**) while utilising resource limiting levels of drug.

293

294 Three transcription factor null mutants ( $\Delta areA$ ,  $\Delta hapB$  and  $\Delta devR$ ) showed reproducible  
295 increased relative fitness in the presence of olorofim and elevated MICs compared to  
296 MFIG001 (**Figure 2b, c and d**). Remarkably, two of these mutants ( $\Delta areA$  and  $\Delta hapB$ ) are  
297 also resistant to the azole class of antifungals [23]. Loss of AreA, a transcription factor that  
298 has a global role in activating expression of genes involved in nitrogen acquisition and  
299 processing [38] or loss of HapB, which along with HapC and HapE comprise the CCAAT  
300 Binding Complex (CBC) [39] resulted in a 2-fold increase in MIC to olorofim when  
301 compared to the isotype control MFIG001; IC50 values for these strains were 0.04 mg/L (4-  
302 fold increase) and 0.07 mg/L (8-fold increase), respectively (**Figures 2b and 2c**). This  
303 simultaneous decrease in azole and olorofim susceptibility suggests suggesting a higher level

304 regulatory link between ergosterol biosynthesis and pyrimidine biosynthesis. DevR is a  
305 bHLH transcription factor involved in sporulation and melanin biosynthesis [40]. The  $\Delta devR$   
306 mutant showed a significant reduction in susceptibility to olorofim at concentrations ranging  
307 from 0.008 mg/L to 0.06 mg/L (MIC) and had an IC<sub>50</sub> of 0.025 mg/L (**Figure 2d**). Although  
308 the MIC for this strain increased to >0.125 mg/L most spores did not germinate at this  
309 concentration.

310 One isolate ( $\Delta AFUB\_056620$ ,  $\Delta acdX$ ) showed a reproducible significant increase in  
311 sensitivity to olorofim and had an MIC of 0.03 mg/L and a IC<sub>50</sub> of 0.006 mg/L, 2-fold lower  
312 than *A. fumigatus* MFIG001 (**Figure 2e**). The *acdX* gene encodes a 612 amino acid  
313 transcription factor that contains six WD40 repeat units but no other functional domains, as  
314 shown by a SMART domain search. A reciprocal BLAST of the AFUB\_056620 protein  
315 sequence found a match to the *Saccharomyces cerevisiae* transcription factor Spt8. However,  
316 the proteins only share 44% identity of the entire protein sequence. In *S. cerevisiae*, Spt8  
317 forms part of the SAGA (Spt-Ada-Gcn5-acetyltransferase) complex [41] which is known to  
318 act as a transcriptional activator under several stress conditions. While the orthologue of  
319 AcdX in other fungi generally contain six WD40 domains, in species such as *N. crassa* and  
320 *A. terreus* only five domains are present, however the significance of this is unclear. In *A.*  
321 *nidulans* AcdX has been described to be functional in the SAGA complex and is involved in  
322 repressing genes in acetate metabolism and has a regulatory role in the proline metabolic  
323 pathway [42].

324

325 ***Transcription factor mutants with altered susceptibility to olorofim have defects in nitrogen***  
326 ***assimilation.***

327 Further phenotypic analysis of the null mutants with differential susceptibility to olorofim  
328 revealed that all had differential growth on *Aspergillus* Complete Medium (ACM) (**Figure 3a**

329 **and b)** and *Aspergillus* Minimal Medium (AMM), which contains ammonium tartrate as  
330 nitrogen source (**Figure 3a and c**). The *hapB*, *devR*, *areA* and *acdX* null mutants showed a  
331 reduction of radial growth on ACM of 28%, 22%, 12% and 24% respectively when compared  
332 to the isotype control ( $p < 0.05$ ). On AMM, the *hapB* mutant showed increase radial growth  
333 (58%) however; colony growth was more diffuse than the isotype strain (**Figure 3a and c**).  
334 As olorofim inhibits DHODH, which acts within the pyrimidine biosynthetic pathway we  
335 hypothesised that these growth defects could be reflecting an alteration in the abundance of  
336 precursors of this pathway. Substitution of ammonium tartrate to nitrate did not rescue any of  
337 the growth defects of the transcription factor null mutants, and even exacerbated them in  
338  $\Delta hapB$  and  $\Delta areA$  (**Figure 3d, Supplemental Figure 3**). Glutamine supplementation rescued  
339 the growth rate defects of  $\Delta acdX$  and  $\Delta areA$  although significant growth defects were still  
340 present even after supplementation (**Figure 3e**). Similarly, urea almost completely rescued  
341  $\Delta acdX$  and proline fully rescued  $\Delta hapB$ ,  $\Delta devR$  and  $\Delta acdX$  (**Figure 3f and g**). Taken  
342 together, these results show that these transcription factor null mutants have defects in  
343 nitrogen utilisation that, given its connection with the pyrimidine pathway, could be linked to  
344 olorofim susceptibility.

345

346 ***Changes in susceptibility to olorofim in  $\Delta devR$  and  $\Delta acdX$  mutants are caused by opposing***  
347 ***regulation of pathways preceding pyrimidine biosynthesis.***

348 To facilitate our understanding of how these transcription factors are functioning to alter  
349 olorofim sensitivity we performed whole transcriptome analysis. Upon olorofim exposure (1x  
350 MIC) for 1 hour, a modest 41 genes and 185 genes were up- and downregulated Log<sub>2</sub> fold >  
351 1 (**Figure 4a**) in our isotype-type strain, respectively. Our expectation was that several genes  
352 in the immediate pyrimidine biosynthesis pathway would be upregulated but only the gene  
353 encoding the multifunctional carbamoyl-phosphate synthase/aspartate carbamoyltransferase



354 (PyrABCN, AFUB\_077330) enzyme, which is upstream of DHODH and converts  
355 carbamoyl-P to N-carbamoyl-L-aspartate, was upregulated by Log2 fold >1 (Supplemental  
356 Data 1). Instead, genes associated with pathways that synthesise precursors of the pyrimidine  
357 biosynthetic pathway were identified including oxaloacetate metabolism and glutamate  
358 biosynthesis (**Figure 4b, Figure 4c and Supplemental Data 1**). Genes associated with  
359 tyrosine metabolism; secondary metabolite biosynthesis, glycolysis/gluconeogenesis and  
360 valine, leucine and isoleucine degradation were enriched among downregulated genes  
361 (**Figure 4b**). A STRINGS analysis of differentially regulated genes showed an  
362 interconnected network of genes involved in ergosterol biosynthesis, the TCA cycle and  
363 nitrogen metabolism (**Figure 4c**).

364

365 In order to characterise the basis of differential olorofim susceptibility in the  $\Delta devR$  and  
366  $\Delta acdX$  mutants the transcriptomes of these two mutants were compared to the wild-type  
367 (**Supplemental Data 2**). In the absence of olorofim 510 and 137 genes were respectively  
368 downregulated and upregulated in the  $\Delta devR$  isolate while 212 were downregulated and 194  
369 upregulated upon olorofim exposure. In the absence of olorofim, notable enriched functional  
370 categories included downregulation of genes involved in tyrosine metabolism and an  
371 upregulation of genes involved in the biosynthesis of branched chain amino acids and  
372 metabolism of arginine and proline, the latter of which was also seen under olorofim  
373 exposure (**Figure 5a**). A detailed pathway analysis under olorofim challenge of genes  
374 involved in the conversion of metabolites towards L-glutamate and through to orotate  
375 revealed that proline uptake and degradation were upregulated in the  $devR$  null mutant  
376 (**Figure 5b and d**). Other pathways that contribute to orotate precursors were also  
377 significantly upregulated, notably the nitrate assimilation pathway (NAP [*crnA*, *niaD*, *niiA*]),  
378 and glutamate, glutamine and carbomyl-P synthesis. Pathways that compete with orotidine

379 biosynthesis for L-glutamate were not differentially regulated in any of the assessed mutants  
380 (**Supplemental Data 2**). Our transcriptional data therefore suggests that nitrogen metabolism  
381 is probably altered in this strain in ways that favor the generation of precursors for orotate  
382 biosynthesis and hence could explain the reduced sensitivity of *devR* null mutant to olorofim.  
383 The transcriptome of the olorofim hypersensitive  $\Delta acdX$  mutant also revealed that proline  
384 and arginine metabolism were upregulated compared to the wild-type but genes involved in  
385 the NAP and glutamate, glutamine and carbonyl-P synthesis pathways were downregulated  
386 suggesting that AcdX and DevR have directly opposing functions on these linked pathways  
387 (**Figure 5c, Figure 5d**) and providing further evidence to suggest that regulation of these  
388 pathways is important for olorofim sensitivity.

389 Our transcriptomic data and the phenotype of the null mutants led us to assess the effect of  
390 pyrimidine pathway precursors on olorofim susceptibility in the transcription factor null  
391 mutants. *A. fumigatus* will utilise glutamine as a preferential nitrogen source, even in the  
392 presence of other nitrogen containing compounds such as nitrate as pathways that process  
393 these precursors are repressed [43, 44]. Intriguingly however, when nitrate was added to the  
394 glutamine containing RPMI-1640, the sensitivity of *A. fumigatus* to olorofim increased  
395 indicating that even in the presence of preferential nitrogen sources, nitrate can initiate an  
396 adaptive response (**Supplemental Figure 4**). In the olorofim resistant, nitrate non-utilising  
397 strain  $\Delta areA$ , addition of nitrate to RPMI reduced susceptibility levels back to that seen for  
398 the wild-type. For the  $\Delta devR$  isolate, where the nitrate assimilation pathway as well as all  
399 other pathways leading to pyrimidine biosynthesis are upregulated, addition of nitrate did not  
400 reduce olorofim susceptibility. The olorofim hypersensitive *acdX* null was the most impacted  
401 by changes in nitrogen sources, and counter-intuitively given the downregulation of the NAP  
402 in this strain, by the addition of nitrate reduced olorofim susceptibility. These data, combined  
403 with results from our transcriptomic analysis suggest that modification of environmental

404 nitrogen sources and or dysregulation of nitrogen metabolism directly impacts changes in  
405 olorofim sensitivity.

406 *Azole mediated antagonism of olorofim is linked to dysregulation of pyrimidine precursor*  
407 *pathways but is not mediated by transcription factors that govern drug resistance.*

408 Next, we assessed if the transcription factor null mutants with differential susceptibility to  
409 olorofim retained antagonism by voriconazole. To our surprise, antagonism was not affected  
410 in these mutants (**Figure 6a, Supplemental Figure 5**). This indicates that antagonism is  
411 more complex and potentially requires multiple regulatory factors. This led us to hypothesize  
412 that we could affect antagonism by unlinking the pyrimidine pathway from the transcriptional  
413 effect of the addition of sub-MIC concentrations of azole. Therefore, we replaced the  
414 promoters of *glnA* (AFUB\_070010), *pyrABCN* (AFUB\_077330) and its paralogues  
415 AFUB\_025880, *pyrD* (AFUB\_085720) and *pyrE* (AFUB\_026780) with the doxycycline-  
416 regulatable promoter (tetOFF). As expected, replacing the native promoter of *pyrE* with the  
417 highly expressing and inducible tetOFF promoter (**Supplemental Figure 6a**), susceptibility  
418 to olorofim reduced dramatically when assessed by broth microdilution (**Figure 6b**). In  
419 keeping with our hypothesis that genes upstream of *pyrE* are also important in mediating  
420 olorofim susceptibility, modest but reproducible decreases in susceptibility were also  
421 observed when the promoters of either *pyrABCN* or *pyrD* were replaced. Next, we assessed  
422 susceptibility of these mutants on solid medium using a disk assay. Strikingly under the same  
423 conditions, susceptibility of the strains to the azoles increased, suggesting that if resistance to  
424 olorofim is induced by upregulation of this pathway, strains may well be hypersensitive to the  
425 azoles (**Figure 6c**).

426 To ensure there was no significant impact on changing the susceptibility of the azoles in our  
427 assessment of antagonism in our plate assay, doxycycline levels were titrated to ensure the  
428 halo induced by olorofim and voriconazole was almost identical to that of MFIG001

429 **(Supplemental Figure 6b)**. Consistent with our hypothesis that azole induced antagonism is  
430 mediated by the pyrimidine biosynthesis pathway antagonism was reduced in a step-wise  
431 manner within genes of the pyrimidine pathway, and completely ablated in the  
432 tetOFF:DHODH, regardless of the amount of doxycycline used (**Figure 6d, Supplemental**  
433 **Figure 6c**).

434 In conclusion, we have identified a high-level coordination of the regulation of azole and  
435 orotomide resistance, seemingly caused by a crosstalk between the control of the ergosterol  
436 and pyrimidine biosynthetic pathways. These pathways are induced in the presence of the  
437 azoles resulting in an antagonistic effect on the novel DHODH inhibitor olorofim.

438

439

440 **Discussion**

441 Olorofim is a novel antifungal, currently in phase 3 clinical trials. It has a broad spectrum of  
442 activity against most moulds and acts by inhibiting the pyrimidine biosynthetic pathway  
443 through disruption of DHODH activity [7]. Our preliminary analysis of the inhibitory effects  
444 of olorofim revealed that the MIC and the IC<sub>50</sub> were separated over a relatively large  
445 concentration range (5-fold). This contrasts with what is seen with itraconazole and other  
446 azoles where this concentration spread is typically 2-fold. The clinical implication of this  
447 finding remains unclear, however it is likely that olorofim will support clearance of an  
448 infection at doses well below the MIC. At these lower concentrations however, exposure to  
449 drug will be imparting selective pressure and has the potential to induce the production of  
450 mutagenic precursors that may drive the emergence of resistance as has been shown for  
451 several antibiotics [45]. As with other anti-infectives that act by inhibiting a single biological  
452 target there is clear potential for emergence of resistance. Understanding these mechanisms  
453 will provide a framework for development of diagnostics to detect resistance rapidly in the  
454 clinic.

455 Our previous survey of itraconazole sensitivity in the *A. fumigatus* COFUN transcription  
456 factor knockout library [46] revealed 6 null mutants that had decreased sensitivity (ranging  
457 from 4 to 6-fold increase in MIC compared to the isogenic control) and 6 had increased  
458 sensitivity (4 to 8-fold decrease in MIC) to itraconazole. Here our screen revealed that only 1  
459 mutant ( $\Delta acdX$ ) showed increased sensitivity while 3 showed decreased sensitivity ( $\Delta hapB$ ,  
460  $\Delta devR$ ,  $\Delta areA$ ) to olorofim and the changes in sensitivity in these isolates were less extreme  
461 than seen for the azoles indicating that the frequency of olorofim resistance maybe lower than  
462 that seen for itraconazole. Indeed this hypothesis is supported by a recent study that revealed  
463 the frequency of olorofim resistance is variable between strain ranging from  $1.3 \times 10^{-7}$ –  
464  $6.9 \times 10^{-9}$ , while for itraconazole resistance occurs at an order of magnitude higher

465 (1.2 × 10<sup>-6</sup> and 3.3 × 10<sup>-8</sup>) [22]. It is unsurprising, given the mechanism of action of  
466 olorofim, that the transcription factors that we have identified in this screen either have well  
467 defined roles in regulating nitrogen utilisation or have been linked to this function in our  
468 study.

469 What is remarkable however given the distinct mechanisms of actions of the two compound  
470 classes, loss of function of either of AreA and HapB results in cross-class resistance to both  
471 the azoles and orotomides. HapB is a member of the heterotrimeric CCAAT-binding complex  
472 (CBC) and alongside HapC and HapE regulates the expression of over a third of the genome  
473 [47] including several genes involved in ergosterol biosynthesis. The *hapB* null displayed the  
474 highest levels of resistance to olorofim and was able to germinate at 0.12 mg/L, which is 8-  
475 fold higher than the parental isolate but within the concentration range needed for clinical  
476 utility. In *A. nidulans* AreA is a positive regulator of many genes that are required for  
477 utilisation of nitrogen sources other than glutamate or ammonia [48] with loss of function  
478 resulting in an inability to utilise amongst other nitrogen sources, nitrate, nitrite, uric acid and  
479 many amino acids [49]. Reassuringly however, drug concentrations in animal models are  
480 tolerated well above the increased MIC levels of the null mutants identified in this screen.  
481 Dosing 8 mg/kg at 8 hour intervals in mice results in peak serum levels of 2.5-3 mg/L [50].  
482 Olorofim can be tolerated at doses as high as 30 mg/kg intravenously, giving scope for higher  
483 drug levels *in vivo* if required. In cynomolgus monkeys a single oral dose of olorofim  
484 resulted in peak levels of 0.605-0.914 mg/L in serum for female and male animals,  
485 respectively [51].

486 Our studies have shown there is a clear uni-directional antagonism of the azoles on  
487 olorofim, mediated by azole induced overexpression of the pyrimidine biosynthetic pathway  
488 and/or metabolic flux through this pathway. Whilst concerning, the antagonism is only  
489 evident when relatively low levels of both drugs are used. It is interesting to note that the

490 TR<sub>34</sub> L98H isolate used in this study has reduced susceptibility to olorofim when compared  
491 to the CEA10 isolate and the antagonism drives the MIC above 0.5 mg/L, whether this is of  
492 clinical significance remains to be determined. Interestingly, over-expression of any part of  
493 the pyrimidine biosynthetic pathway results in a modest increase in susceptibility of *A.*  
494 *fumigatus* to the azoles indicating that some strains that are resistant to olorofim may be more  
495 susceptible to the azoles and highlighting that there is complex crosstalk between the  
496 ergosterol and pyrimidine biosynthetic pathways. If these drugs are to be used in combination  
497 in a clinical setting, careful evaluation of respective drug levels at the site of infection to  
498 ensure sufficient concentration of drug to avoid antagonism would be sensible. The  
499 consequences of using azoles and olorofim in combination for treatment of strains harbouring  
500 the TR<sub>34</sub> L98H allele also needs further evaluation.

501 In summary, we have explored the mechanism behind olorofim susceptibility through  
502 a systematic analysis of the COFUN transcription factor null library. All the mutants we  
503 identified that had altered sensitivity to olorofim have associated defects in nitrogen  
504 metabolism. Two of these mutants,  $\Delta devR$  and  $\Delta acdX$ , show dysregulation of genes involved  
505 in metabolic pathways immediately upstream of the pyrimidine pathway potentially leading  
506 to a differential flux of metabolites into this pathway. Importantly, we have identified two  
507 transcription factors, the CBC and AreA, that regulate cross resistance to both the azoles and  
508 olorofim. Lastly, we have detected an antagonistic effect between olorofim and the azoles  
509 which we can modulate through transcriptionally unlinking the pyrimidine pathway from  
510 upstream pathways.

511

512 **References**

- 513 1. Bongomin, F., et al., *Global and Multi-National Prevalence of Fungal Diseases-*  
514 *Estimate Precision*. J Fungi (Basel), 2017. **3**(4).
- 515 2. Patterson, T.F., et al., *Practice Guidelines for the Diagnosis and Management of*  
516 *Aspergillosis: 2016 Update by the Infectious Diseases Society of America*. Clin Infect  
517 Dis, 2016. **63**(4): p. e1-e60.
- 518 3. Snelders, E., et al., *Possible environmental origin of resistance of Aspergillus*  
519 *fumigatus to medical triazoles*. Appl Environ Microbiol, 2009. **75**(12): p. 4053-7.
- 520 4. Rhodes, J., et al., *Population genomics confirms acquisition of drug-resistant*  
521 *Aspergillus fumigatus infection by humans from the environment*. Nature  
522 microbiology, 2022. **7**(5): p. 663-674.
- 523 5. van Rhijn, N. and M. Bromley, *The Consequences of Our Changing Environment on*  
524 *Life Threatening and Debilitating Fungal Diseases in Humans*. Journal of Fungi,  
525 2021. **7**(5): p. 367.
- 526 6. Rauseo, A.M., et al., *Hope on the Horizon: Novel Fungal Treatments in Development*.  
527 Open Forum Infect Dis, 2020. **7**(2): p. ofaa016.
- 528 7. Oliver, J.D., et al., *F901318 represents a novel class of antifungal drug that inhibits*  
529 *dihydroorotate dehydrogenase*. Proc Natl Acad Sci U S A, 2016. **113**(45): p. 12809-  
530 12814.
- 531 8. Hope, W.W., et al., *Pharmacodynamics of the Orotomides against Aspergillus*  
532 *fumigatus: New Opportunities for Treatment of Multidrug-Resistant Fungal Disease*.  
533 mBio, 2017. **8**(4).
- 534 9. Boschi, D., et al., *Dihydroorotate dehydrogenase inhibitors in anti-infective drug*  
535 *research*. Eur J Med Chem, 2019. **183**: p. 111681.



- 536 10. du Pre, S., et al., *The Dynamic Influence of Olorofim (F901318) on the Cell*  
537 *Morphology and Organization of Living Cells of Aspergillus fumigatus*. J Fungi  
538 (Basel), 2020. **6**(2).
- 539 11. du Pre, S., et al., *Effect of the Novel Antifungal Drug F901318 (Olorofim) on Growth*  
540 *and Viability of Aspergillus fumigatus*. Antimicrob Agents Chemother, 2018. **62**(8).
- 541 12. Biswas, C., et al., *In vitro activity of the novel antifungal compound F901318 against*  
542 *Australian Scedosporium and Lomentospora fungi*. Med Mycol, 2018. **56**(8): p. 1050-  
543 1054.
- 544 13. Kirchhoff, L., et al., *Antibiofilm activity of antifungal drugs, including the novel drug*  
545 *olorofim, against Lomentospora prolificans*. J Antimicrob Chemother, 2020.
- 546 14. Lim, W., et al., *Madurella mycetomatis, the main causative agent of eumycetoma, is*  
547 *highly susceptible to olorofim*. J Antimicrob Chemother, 2020. **75**(4): p. 936-941.
- 548 15. Seyedmousavi, S., et al., *Efficacy of Olorofim (F901318) against Aspergillus*  
549 *fumigatus, A. nidulans, and A. tanneri in Murine Models of Profound Neutropenia*  
550 *and Chronic Granulomatous Disease*. Antimicrob Agents Chemother, 2019. **63**(6).
- 551 16. Wiederhold, N.P., D. Law, and M. Birch, *Dihydroorotate dehydrogenase inhibitor*  
552 *F901318 has potent in vitro activity against Scedosporium species and Lomentospora*  
553 *prolificans*. J Antimicrob Chemother, 2017. **72**(7): p. 1977-1980.
- 554 17. Wiederhold, N.P., et al., *The Orotomide Olorofim Is Efficacious in an Experimental*  
555 *Model of Central Nervous System Coccidioidomycosis*. Antimicrob Agents  
556 Chemother, 2018. **62**(9).
- 557 18. Lackner, M., et al., *Dihydroorotate dehydrogenase inhibitor olorofim exhibits*  
558 *promising activity against all clinically relevant species within Aspergillus section*  
559 *Terrei*. J Antimicrob Chemother, 2018. **73**(11): p. 3068-3073.

- 560 19. Jorgensen, K.M., et al., *EUCAST Determination of Olorofim (F901318) Susceptibility*  
561 *of Mold Species, Method Validation, and MICs*. Antimicrob Agents Chemother, 2018.  
562 **62**(8).
- 563 20. Buil, J.B., et al., *In vitro activity of the novel antifungal compound F901318 against*  
564 *difficult-to-treat Aspergillus isolates*. J Antimicrob Chemother, 2017. **72**(9): p. 2548-  
565 2552.
- 566 21. Rivero-Menendez, O., M. Cuenca-Estrella, and A. Alastruey-Izquierdo, *In vitro*  
567 *activity of olorofim (F901318) against clinical isolates of cryptic species of*  
568 *Aspergillus by EUCAST and CLSI methodologies*. J Antimicrob Chemother, 2019.  
569 **74**(6): p. 1586-1590.
- 570 22. Buil, J.B., et al., *Resistance profiling of Aspergillus fumigatus to olorofim indicates*  
571 *absence of intrinsic resistance and unveils the molecular mechanisms of acquired*  
572 *olorofim resistance*. Emerging Microbes & Infections, 2022. **11**(1): p. 703-714.
- 573 23. Furukawa, T., et al., *The negative cofactor 2 complex is a key regulator of drug*  
574 *resistance in Aspergillus fumigatus*. Nature communications, 2020. **11**(1): p. 1-16.
- 575 24. Bertuzzi, M., et al., *On the lineage of Aspergillus fumigatus isolates in common*  
576 *laboratory use*. Med Mycol, 2020.
- 577 25. Rodriguez-Tudela, J.L., et al., *Epidemiological cutoffs and cross-resistance to azole*  
578 *drugs in Aspergillus fumigatus*. Antimicrob Agents Chemother, 2008. **52**(7): p. 2468-  
579 72.
- 580 26. Berman, J. and D.J. Krysan, *Drug resistance and tolerance in fungi*. Nat Rev  
581 Microbiol, 2020. **18**(6): p. 319-331.
- 582 27. Barratt, R.W., G.B. Johnson, and W.N. Ogata, *Wild-type and mutant stocks of*  
583 *Aspergillus nidulans*. Genetics, 1965. **52**(1): p. 233-46.

- 584 28. Bolger, A.M., M. Lohse, and B. Usadel, *Trimmomatic: a flexible trimmer for Illumina*  
585 *sequence data*. Bioinformatics, 2014. **30**(15): p. 2114-20.
- 586 29. Howe, K.L., et al., *Ensembl Genomes 2020-enabling non-vertebrate genomic*  
587 *research*. Nucleic Acids Res, 2020. **48**(D1): p. D689-D695.
- 588 30. Love, M.I., W. Huber, and S. Anders, *Moderated estimation of fold change and*  
589 *dispersion for RNA-seq data with DESeq2*. Genome Biol, 2014. **15**(12): p. 550.
- 590 31. Priebe, S., et al., *FungiFun2: a comprehensive online resource for systematic analysis*  
591 *of gene lists from fungal species*. Bioinformatics, 2015. **31**(3): p. 445-6.
- 592 32. Odds, F.C., *Synergy, antagonism, and what the chequerboard puts between them*.  
593 *Journal of Antimicrobial Chemotherapy*, 2003. **52**(1): p. 1-1.
- 594 33. Wanka, F., et al., *Tet-on, or Tet-off, that is the question: advanced conditional gene*  
595 *expression in Aspergillus*. Fungal Genetics and Biology, 2016. **89**: p. 72-83.
- 596 34. van Rhijn, N., et al., *Development of a marker-free mutagenesis system using*  
597 *CRISPR-Cas9 in the pathogenic mould Aspergillus fumigatus*. Fungal Genetics and  
598 *Biology*, 2020. **145**: p. 103479.
- 599 35. Soothill, J.S., R. Ward, and A.J. Girling, *The IC50: an exactly defined measure of*  
600 *antibiotic sensitivity*. J Antimicrob Chemother, 1992. **29**(2): p. 137-9.
- 601 36. Gsaller, F., et al., *Sterol Biosynthesis and Azole Tolerance Is Governed by the*  
602 *Opposing Actions of SrbA and the CCAAT Binding Complex*. PLoS Pathog, 2016.  
603 **12**(7): p. e1005775.
- 604 37. Poulsen, J.S., et al., *Physiological responses of Aspergillus niger challenged with*  
605 *itraconazole*. Antimicrobial agents and chemotherapy, 2021. **65**(6): p. e02549-20.
- 606 38. Amaar, Y.G. and M.M. Moore, *Mapping of the nitrate-assimilation gene cluster*  
607 *(crnA-niiA-niaD) and characterization of the nitrite reductase gene (niiA) in the*

- 608 *opportunistic fungal pathogen Aspergillus fumigatus*. *Curr Genet*, 1998. **33**(3): p.  
609 206-15.
- 610 39. Hortschansky, P., et al., *Deciphering the combinatorial DNA-binding code of the*  
611 *CCAAT-binding complex and the iron-regulatory basic region leucine zipper (bZIP)*  
612 *transcription factor HapX*. *J Biol Chem*, 2015. **290**(10): p. 6058-70.
- 613 40. Valiante, V., et al., *The Aspergillus fumigatus conidial melanin production is*  
614 *regulated by the bifunctional bHLH DevR and MADS-box RlmA transcription factors*.  
615 *Molecular microbiology*, 2016. **102**(2): p. 321-335.
- 616 41. Sermwittayawong, D. and S. Tan, *SAGA binds TBP via its Spt8 subunit in competition*  
617 *with DNA: implications for TBP recruitment*. *EMBO J*, 2006. **25**(16): p. 3791-800.
- 618 42. Georgakopoulos, P., R.A. Lockington, and J.M. Kelly, *SAGA complex components*  
619 *and acetate repression in Aspergillus nidulans*. *G3 (Bethesda)*, 2012. **2**(11): p. 1357-  
620 67.
- 621 43. Marzluf, G.A., *Regulations of sulfur and nitrogen metabolism in filamentous fungi*.  
622 *Annual review of microbiology*, 1993. **47**: p. 31-56.
- 623 44. Krappmann, S. and G. Braus, *Nitrogen metabolism of Aspergillus and its role in*  
624 *pathogenicity*. *Medical Mycology*, 2005. **43**(Supplement\_1): p. S31-S40.
- 625 45. Kohanski, M.A., M.A. DePristo, and J.J. Collins, *Sublethal antibiotic treatment leads*  
626 *to multidrug resistance via radical-induced mutagenesis*. *Mol Cell*, 2010. **37**(3): p.  
627 311-20.
- 628 46. Furukawa, T., et al., *The negative cofactor 2 complex is a key regulator of drug*  
629 *resistance in Aspergillus fumigatus*. *Nat Commun*, 2020. **11**(1): p. 427.
- 630 47. Gsaller, F., et al., *Sterol Biosynthesis and Azole Tolerance Is Governed by the*  
631 *Opposing Actions of SrbA and the CCAAT Binding Complex*. *PLoS Pathog*, 2016.  
632 **12**(7): p. e1005775.

- 633 48. Hensel, M., et al., *The role of the Aspergillus fumigatus areA gene in invasive*  
634 *pulmonary aspergillosis*. Mol Gen Genet, 1998. **258**(5): p. 553-7.
- 635 49. Arst, H.N. and D.J. Cove, *Nitrogen metabolite repression in Aspergillus nidulans*.  
636 *Molecular and General Genetics MGG*, 1973. **126**(2): p. 111-141.
- 637 50. Hope, W.W., et al., *Pharmacodynamics of the orotomides against Aspergillus*  
638 *fumigatus: new opportunities for treatment of multidrug-resistant fungal disease*.  
639 *MBio*, 2017. **8**(4).
- 640 51. Law, D., et al. *Pharmacokinetics of the Novel Antifungal Agent F901318 in Mice,*  
641 *Rats and Cynomolgus monkey*. in *Fifty-fifth Interscience Conference on Antimicrobial*  
642 *Agents and Chemotherapy*. San Diego, California. 2015.
- 643

644 **Figure 1: Antagonism of the azoles to olorofim.** (a) Broth dilution assay of olorofim on *A.*  
645 *fumigatus* MFIG001 to olorofim, following EUCAST methodology and measured by OD<sub>600</sub>  
646 (n=4). (b) Addition of 10mM uracil and 10mM uridine reverses the action of olorofim on *A.*  
647 *fumigatus* MFIG001 (n=3). (c) Antagonism on a solid RPMI-1640 plate inoculated with *A.*  
648 *fumigatus* isolates. Voriconazole (800 mg/L) is inoculated on the disk on the left, olorofim  
649 (500 mg/L) on the disk on the right. The disk assay for TR34 L98H contained 8000 mg/L  
650 voriconazole to obtain a halo in equal size to MFIG001. (d) Checkerboard assay (n=3) for  
651 CEA10 and the azole-resistant TR34 L98H isolate to voriconazole and olorofim. Growth is  
652 normalised to RPM-1640 without any antifungal drug. Green equals full growth, black no  
653 observed growth. (e) Disk assay on solid RPMI-1640 at 800 mg/L voriconazole and 500  
654 mg/L olorofim for the TR34 L98H strain. (f) Dose response RNA-seq upon itraconazole  
655 exposure (0.5x MIC – 4x MIC). Expression of genes of the pyrimidine pathway and upstream  
656 pathways are differentially upregulated only in sub-MIC concentrations of itraconazole  
657

658 **Figure 2: Olorofim susceptibility screening of the COFUN transcription factor**  
659 **knockout library.** (a) Relative fitness of each individual strain was assessed by normalising  
660 to fitness in non-drug condition (n=3). TF null mutants that are of particular interest are  
661 highlighted. (b-e) Broth dilution assay of olorofim on the TF null mutants, (b) for  $\Delta hapB$ , (c)  
662 for  $\Delta areA$ , (d) for  $\Delta devR$ , (e) for  $\Delta acdX$ , as determined by OD<sub>600</sub> (n=3). Statistical difference  
663 was assessed by Two-way ANOVA with Sidaks multiple comparison test (\* p<0.05, \*\*  
664 p<0.01, \*\*\* p<0.001, \*\*\* p<0.001).

665  
666 **Figure 3: Phenotypic evaluation of TF null mutants.** (a) 500 spores of TF null mutants and  
667 MFIG001 were spotted on Aspergillus Complete Medium and Aspergillus Minimal Medium  
668 and incubated for 48 hours at 37° Celsius. (b-c) Radial growth of TF null mutants and

669 MFIG001 on ACM (b) and AMM (c), after 72 hours at 37° Celsius (n=3) (d-g) TF null  
670 mutants spotted on AMM supplemented with 10 mM sodium nitrate (d), 10 mM L-glutamine  
671 (e), 10 mM urea (f) or 10 mM L-proline (g) (n=3) Statistical difference was assessed by two-  
672 way ANOVA with Dunn's correction (p-values < 0.05 are shown).

673

674 **Figure 4: Transcriptomics of MFIG001 to olorofim.** (a) Volcano plot of RNA-seq of *A.*  
675 *fumigatus* MFIG001 exposed to olorofim. 185 genes (blue dots) and 41 genes (red dots) were  
676 considered downregulated and upregulated, respectively (>2-fold differentially regulated,  
677 p<0.05). (b) KEGG pathways that are enriched within differentially regulated genes, blue  
678 categories are associated with downregulated genes, red with upregulated genes. (c)  
679 Interactions of proteins involved in response to olorofim as determined by StringsDB.  
680 Proteins derived from upregulated transcripts are in red, downregulated in blue.

681

682 **Figure 5: RNA-seq analysis of  $\Delta devR$  and  $\Delta acdX$  exposed to olorofim.** (a) KEGG  
683 pathways enriched for down- (blue) or upregulated (red) genes in RPMI-1640 or upon  
684 olorofim exposure for  $\Delta devR$  compared to *A. fumigatus* A1160p+. (b) Heatmap of genes  
685 involved in the pyrimidine pathway and component upstream of this pathway. (c) KEGG  
686 pathways enriched for down- (blue) or upregulated (red) genes in RPMI-1640 or upon  
687 olorofim exposure for  $\Delta acdX$  compared to *A. fumigatus* MFIG001. (d) Detailed analysis of  
688 genes involved in pathways upstream of and including the pyrimidine pathway. The target of  
689 olorofim, DHODH, is highlighted. Blue is more than 1-fold downregulated, yellow more than  
690 1-fold upregulated; red is more than 5-fold upregulated. The right of each box is associated  
691 with  $\Delta acdX$ , left with  $\Delta devR$ .

692

693 **Figure 6: Antagonism between olorofim and the azoles through dysregulation of the**  
694 **pyrimidine pathway.** (a) Antagonism for the TF mutants with differential susceptibility to  
695 olorofim (n=6) (b) Microbroth dilution assay by EUCAST methodology to olorofim for  
696 MFIG001 and the generated tetOFF mutants in the pyrimidine pathway (n=3). (c) The halo  
697 size for the generated tetOFF mutants in the pyrimidine pathways to voriconazole and  
698 olorofim (n=4). Statistical significance was assessed using a one-way ANOVA with  
699 Dunnett's correction ( $p < 0.05$  are shown). (d) Antagonism for the tetOFF mutants within the  
700 pyrimidine pathway (n=6). Statistical significance was assessed using a one-way ANOVA  
701 with Dunnett's correction ( $p < 0.05$  are shown).

702

703 **Supplemental Figure 1: Determination of IC<sub>50</sub> for itraconazole.** MIC to olorofim in  
704 RPMI-1640 was determined according to EUCAST methodology for *A. fumigatus* MFIG001.  
705 OD<sub>600</sub> was measured after 48 hours to determine growth quantitatively.

706

707 **Supplemental Figure 2: Antagonism between manogepix and olorofim.** Antagonism was  
708 assessed and quantified (n=6) between manogepix and olorofim. A synergy between these  
709 two novel antifungals was observed.

710

711 **Supplemental Figure 3: Images of nitrogen spot tests of TF null mutants.** Growth of TF  
712 null mutants and wild-type was assessed on AMM supplemented with 50 mM ammonium  
713 tartrate, 10 mM sodium nitrate, 10 mM L-glutamine, 10 mM urea or 10 mM L-proline (n=3).  
714 Images were taken after 72 hours at 37 Celsius.

715

716 **Supplemental Figure 4: The effect of nitrogen source on olorofim susceptibility.** MICs  
717 according to EUCAST methodology in RPMI-1640 supplemented with either 20 mM



718 arginine, 10 mM nitrate, 20 mM proline or 50 mM glutamine. Addition of nitrate changed  
719 Olorofim susceptibility by 2-fold for all strains except  $\Delta devR$ .

720

721 **Supplemental Figure 5: Antagonism of the azoles to olorofim for TF mutants.**

722 Representative images of TF mutants with differential susceptibility to olorofim tested for  
723 antagonism between voriconazole (800 mg/L) and olorofim (500 mg/L).

724

725 **Supplemental Figure 6: Overexpression of DHODH by inserting the tetOFF cassette. (a)**

726 The DHODH gene was overexpressed by inserting the tetOFF cassette as a promoter system.

727 Expression was measured by qPCR (n=3) without doxycycline and could be reduced by

728 addition of doxycycline (50  $\mu$ g/mL). (b) The halo size for tetOFF:DHODH at different

729 doxycycline concentrations. (c) The area inside the halo at different concentrations of

730 doxycycline (n=6) for the tetOFF:DHODH mutant.

731

732 **Supplemental Table 1: Oligos and crRNA used in this study.**

733



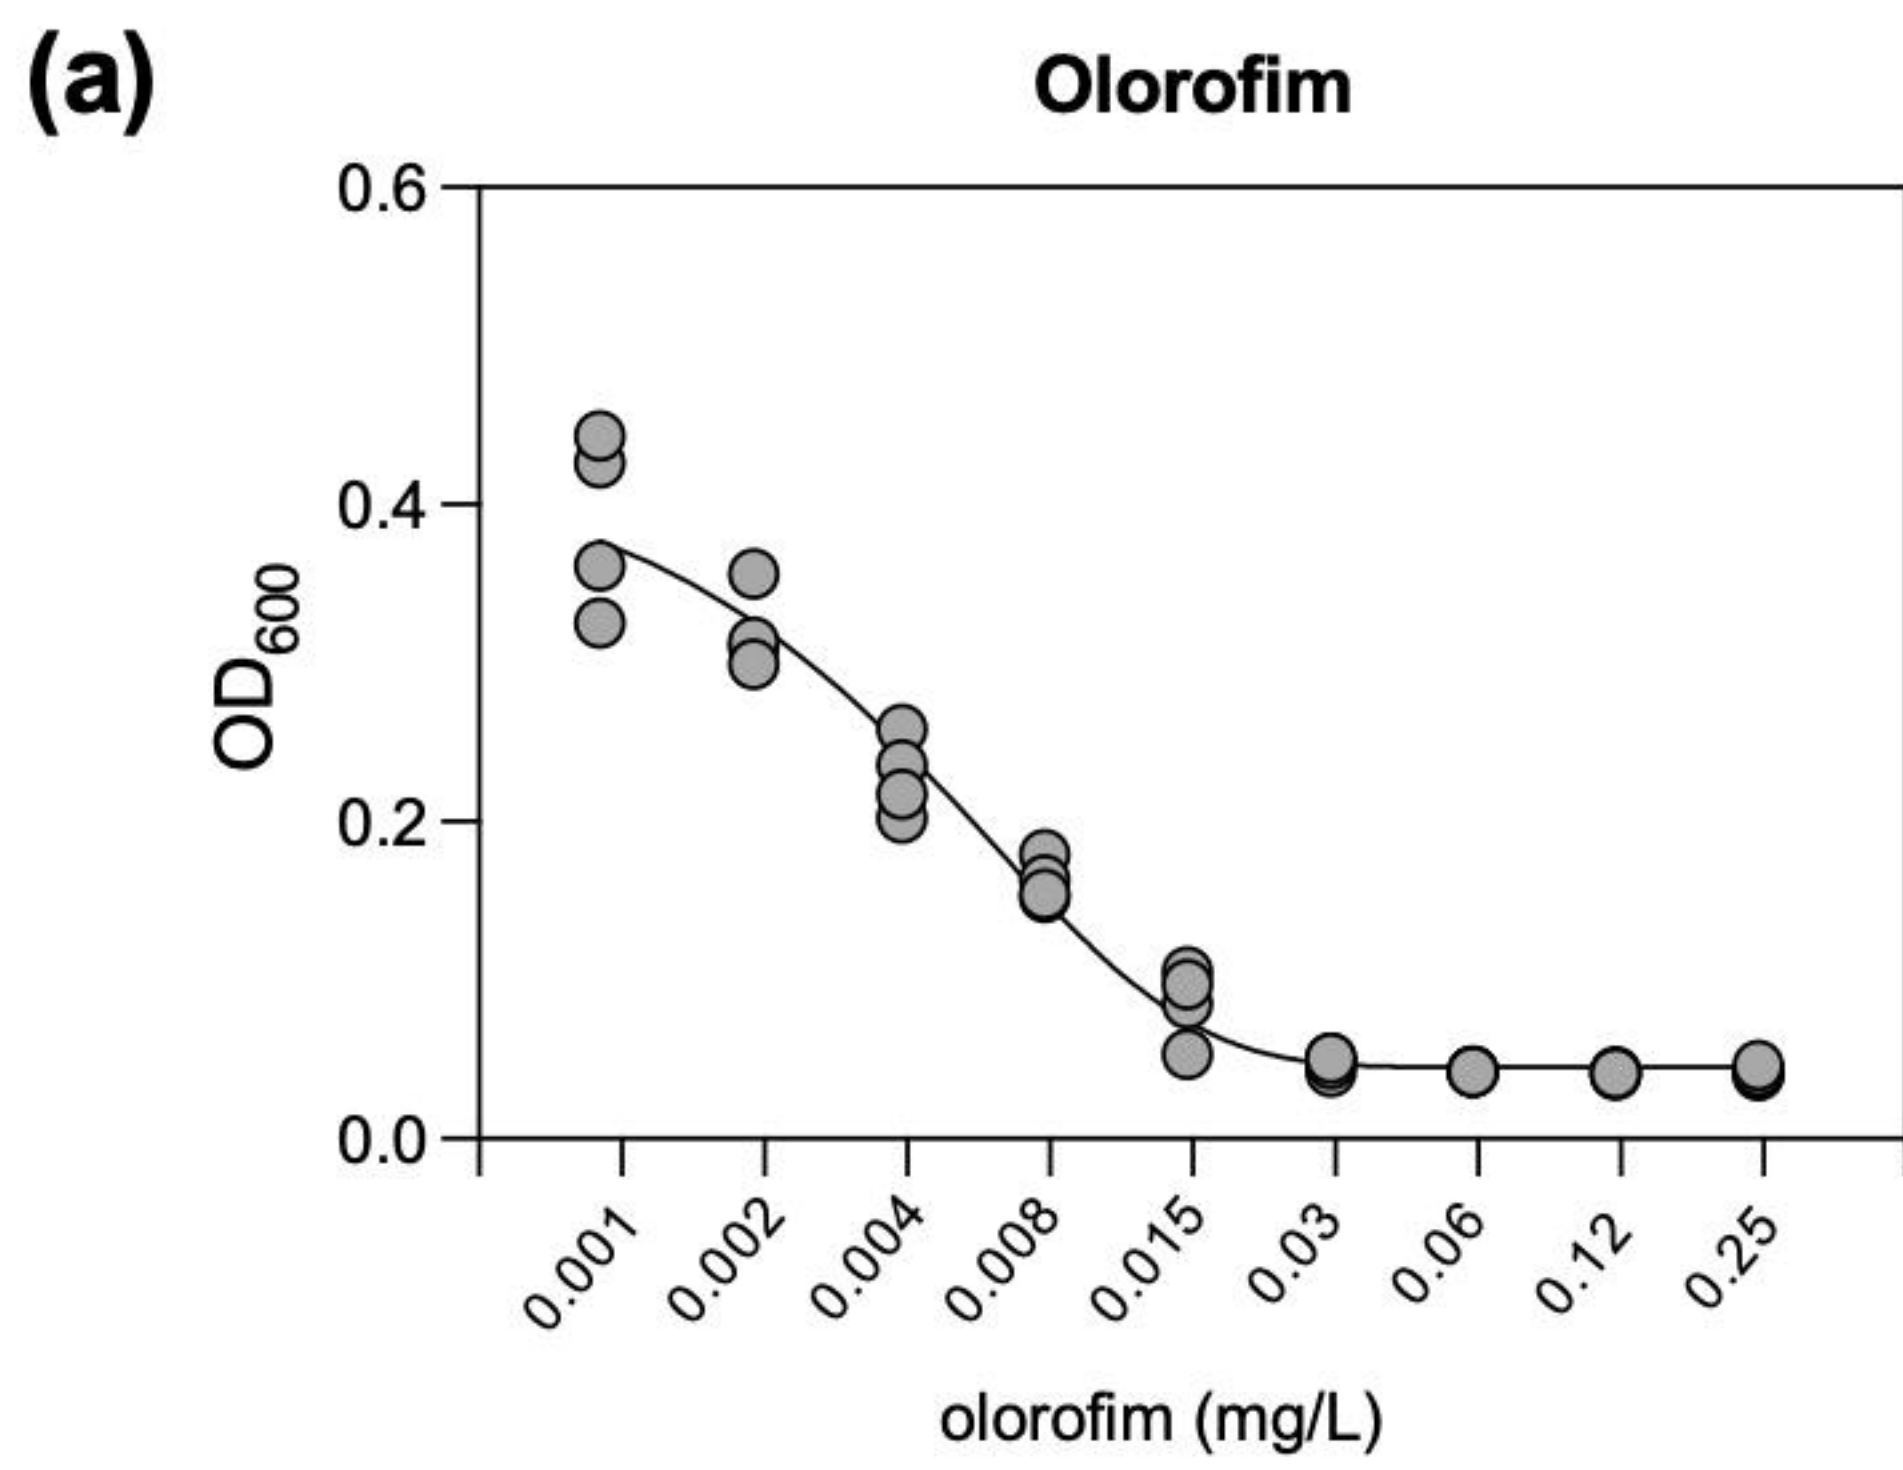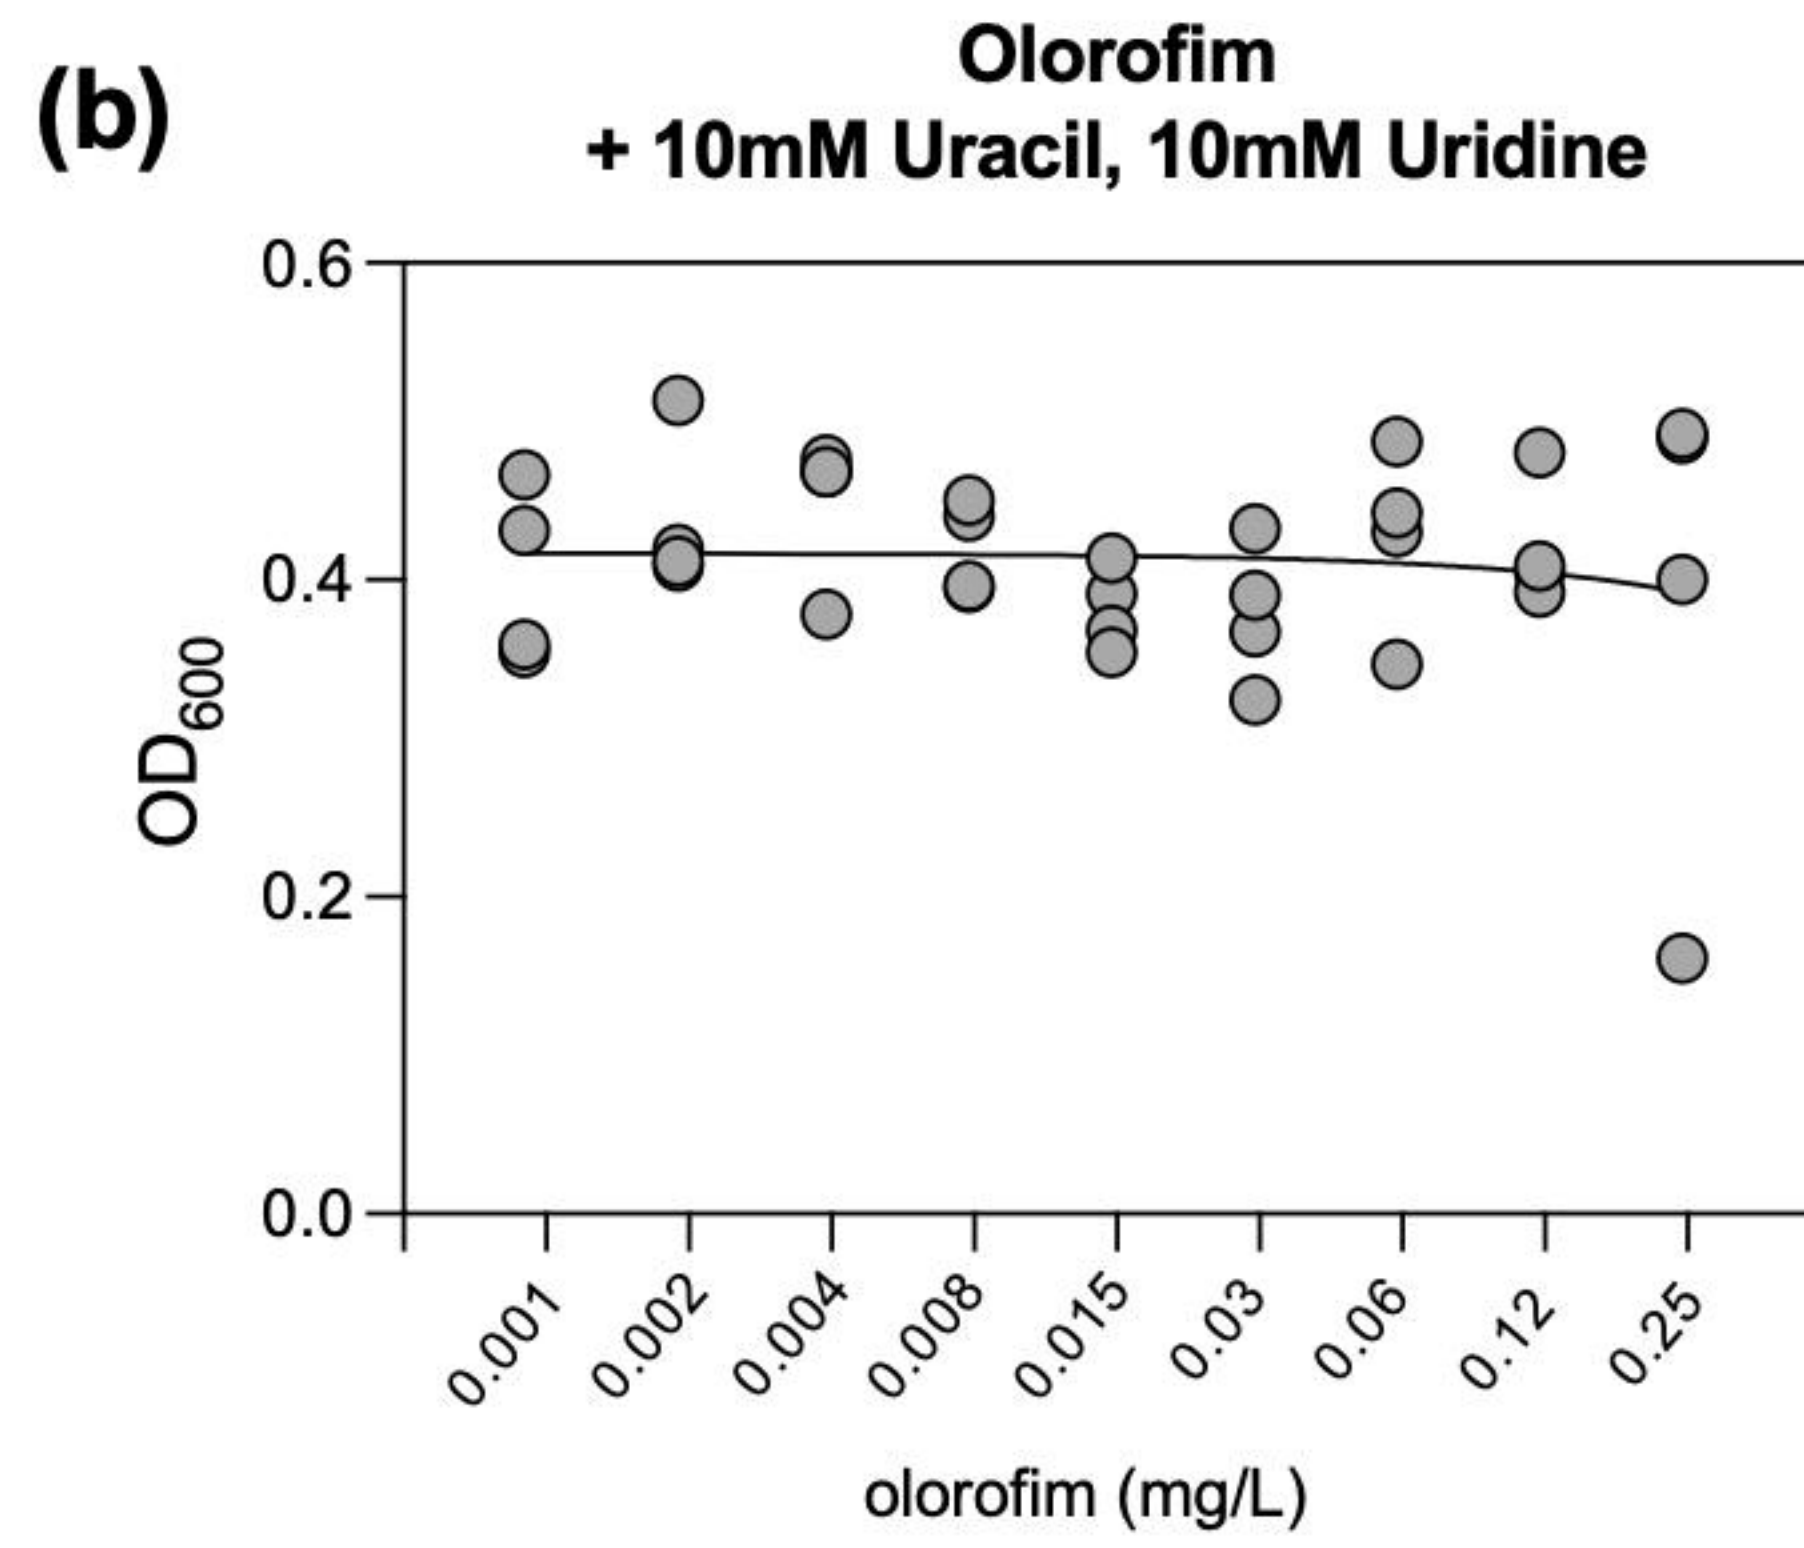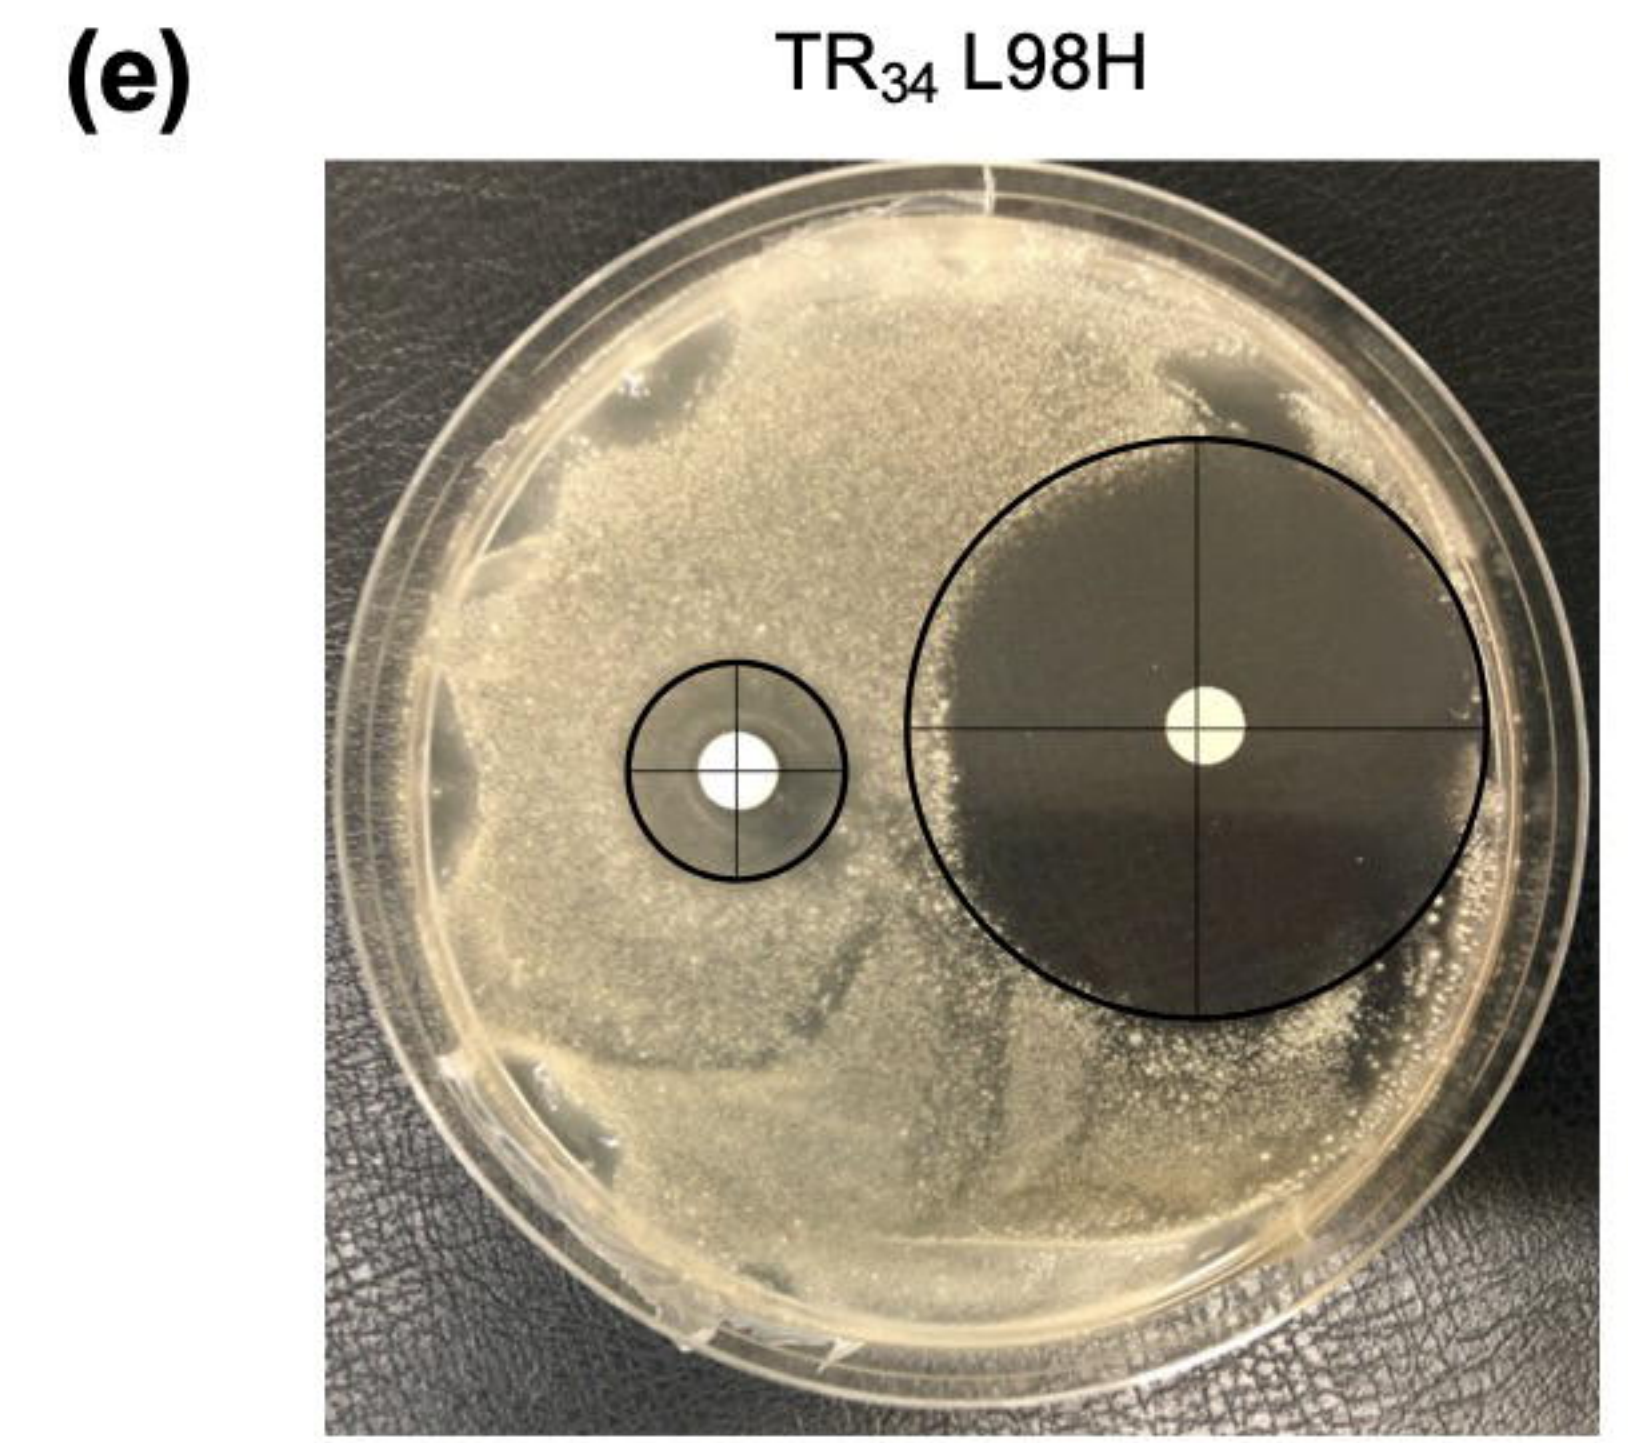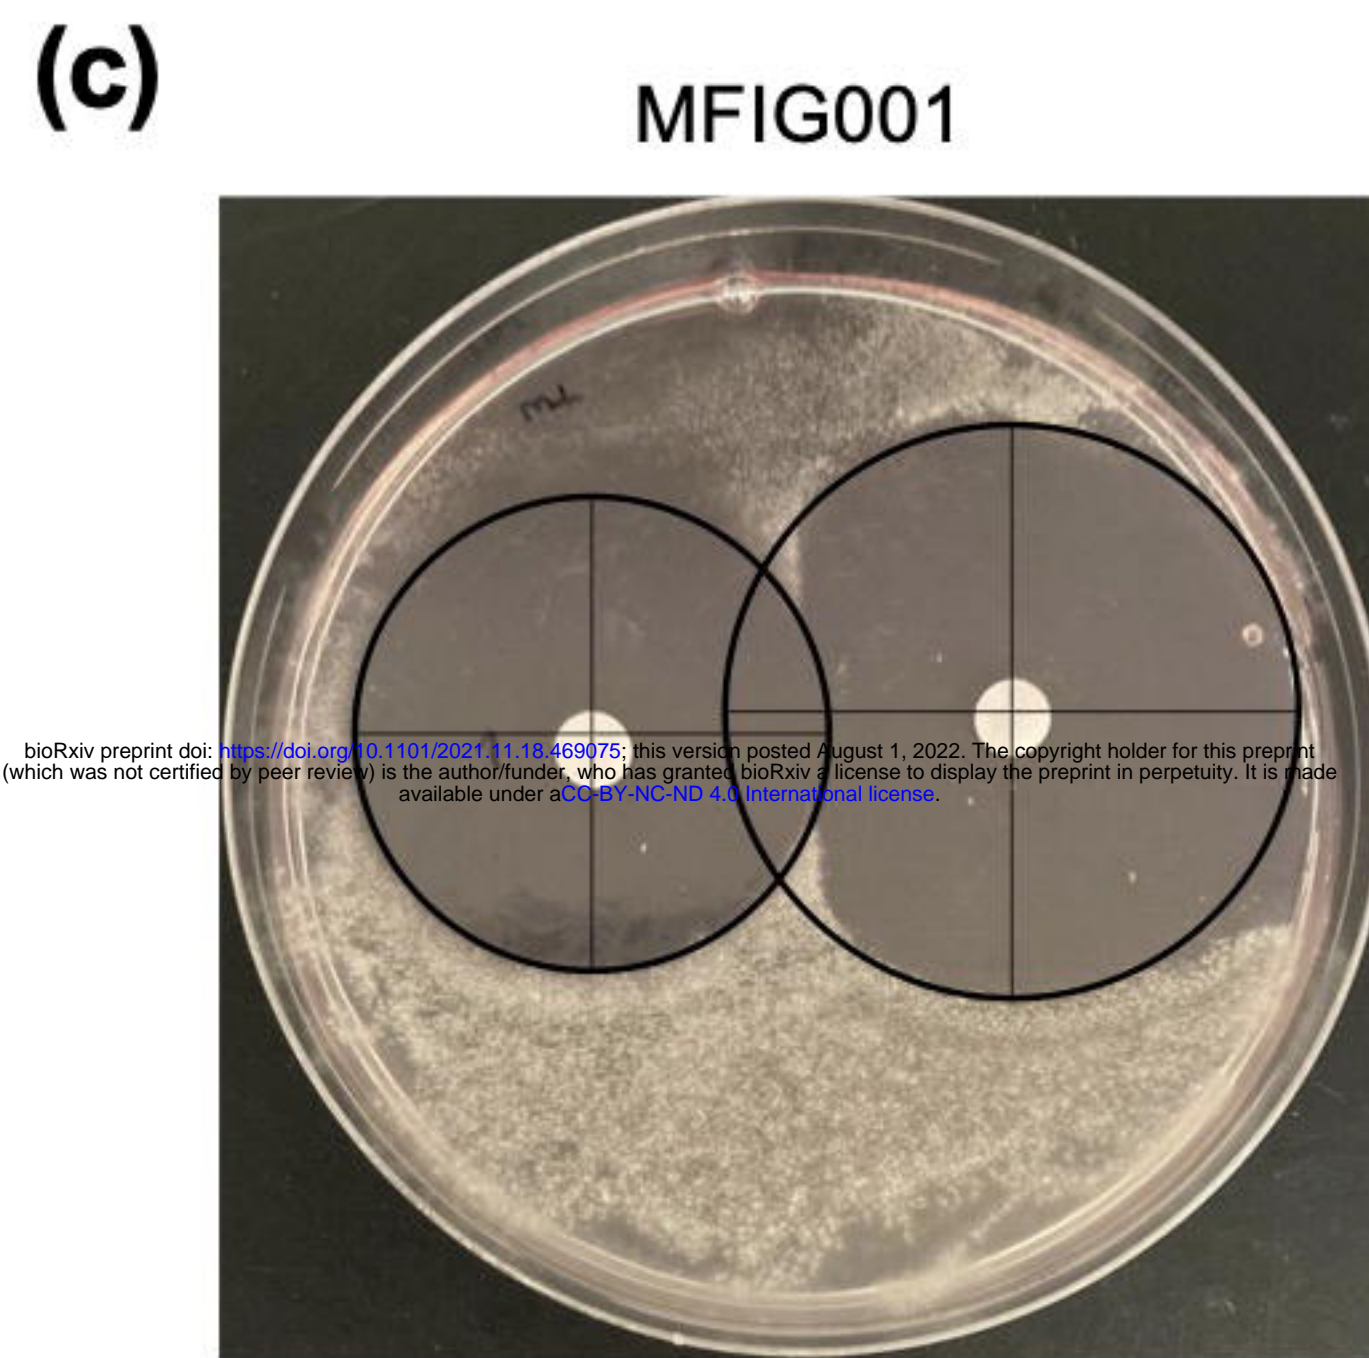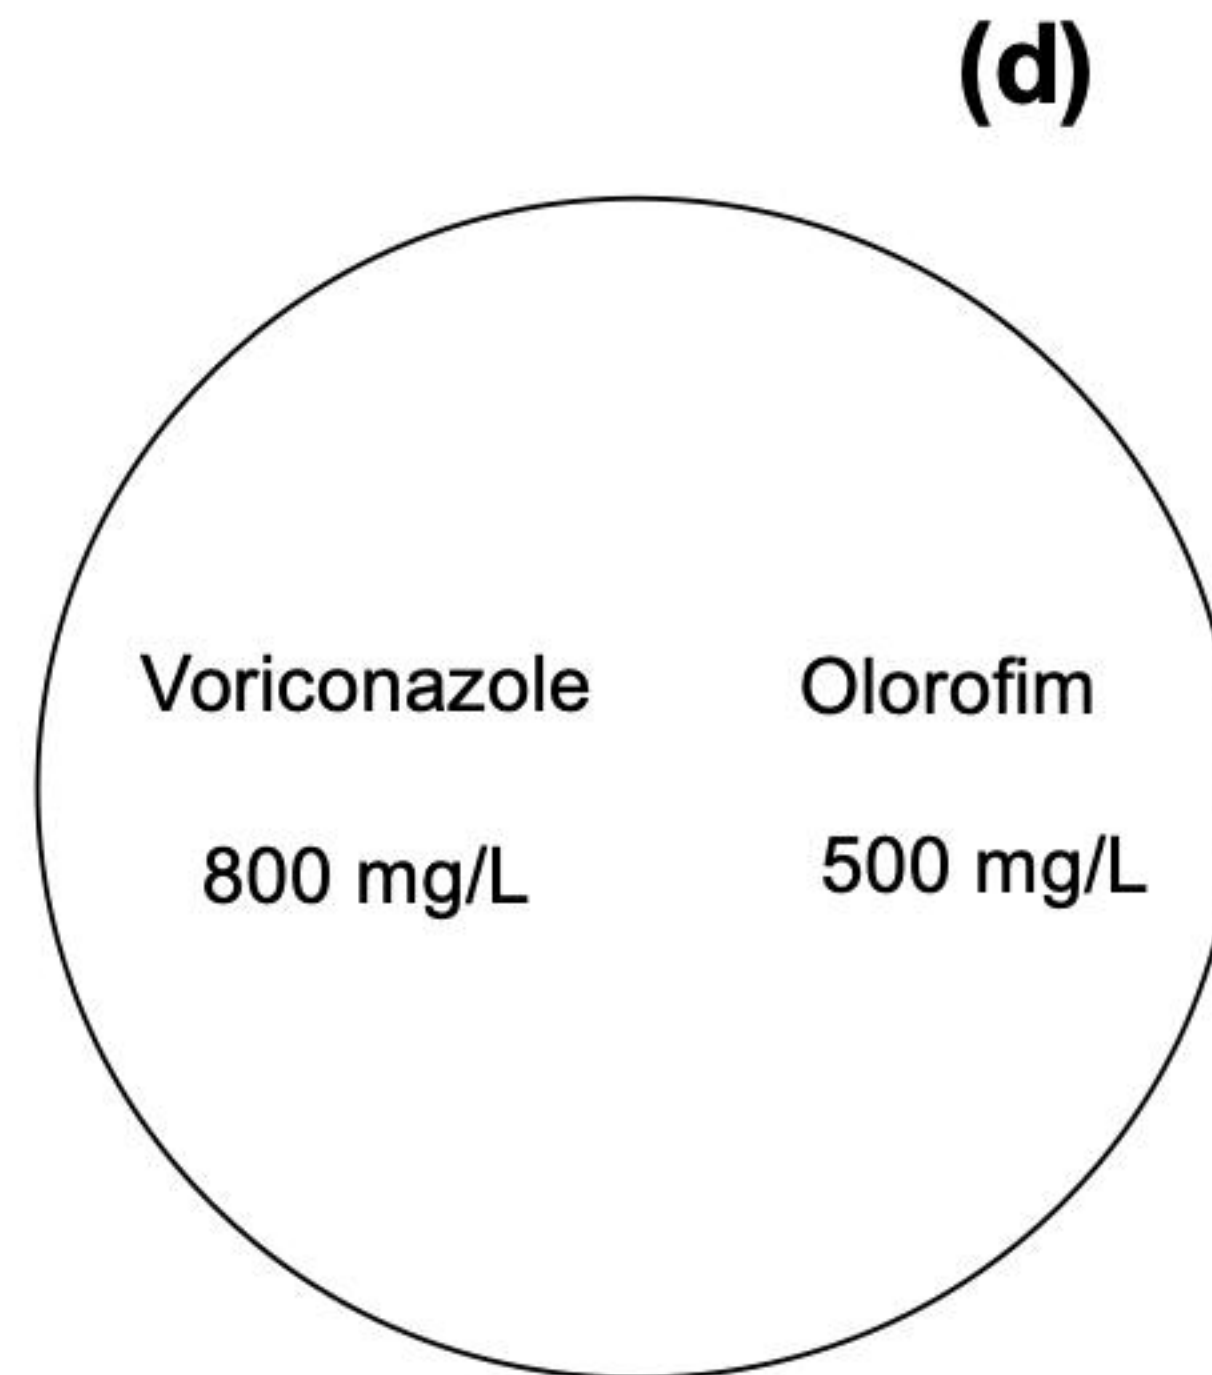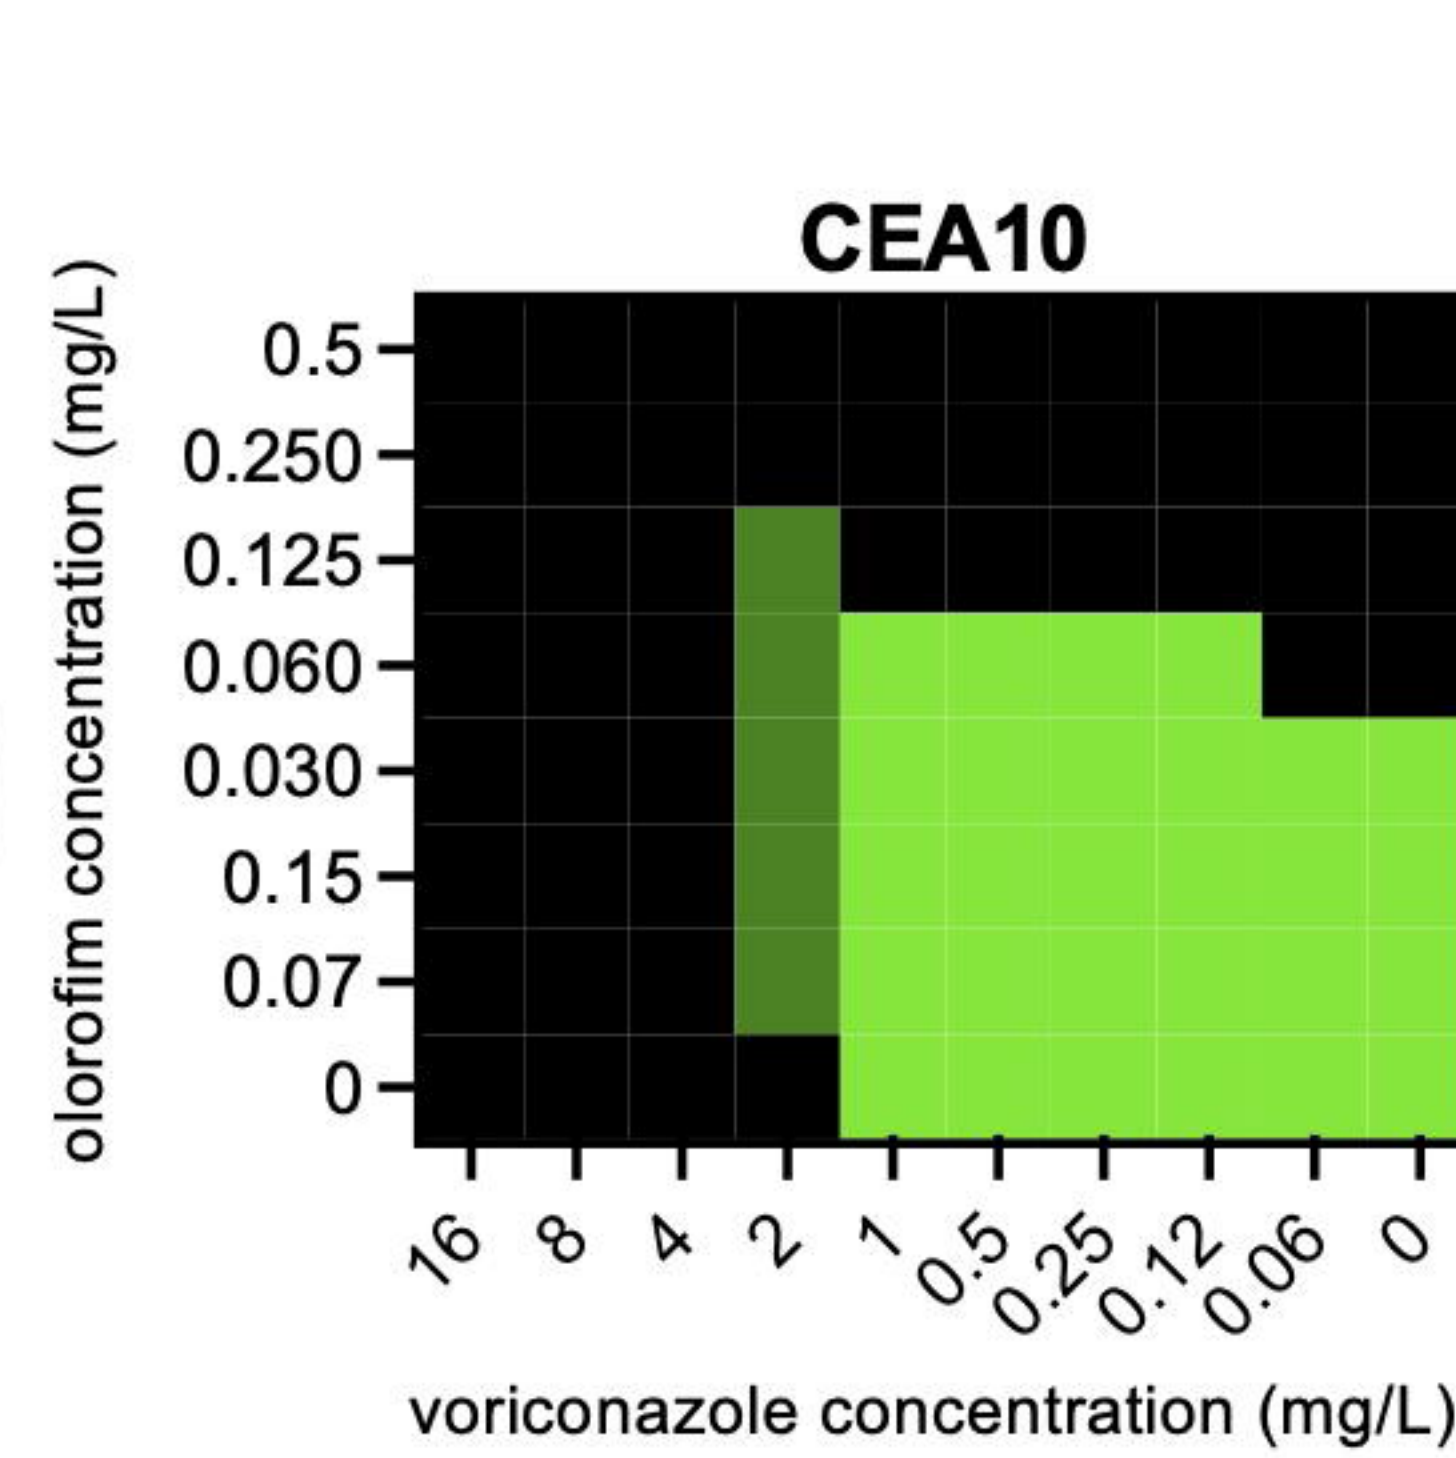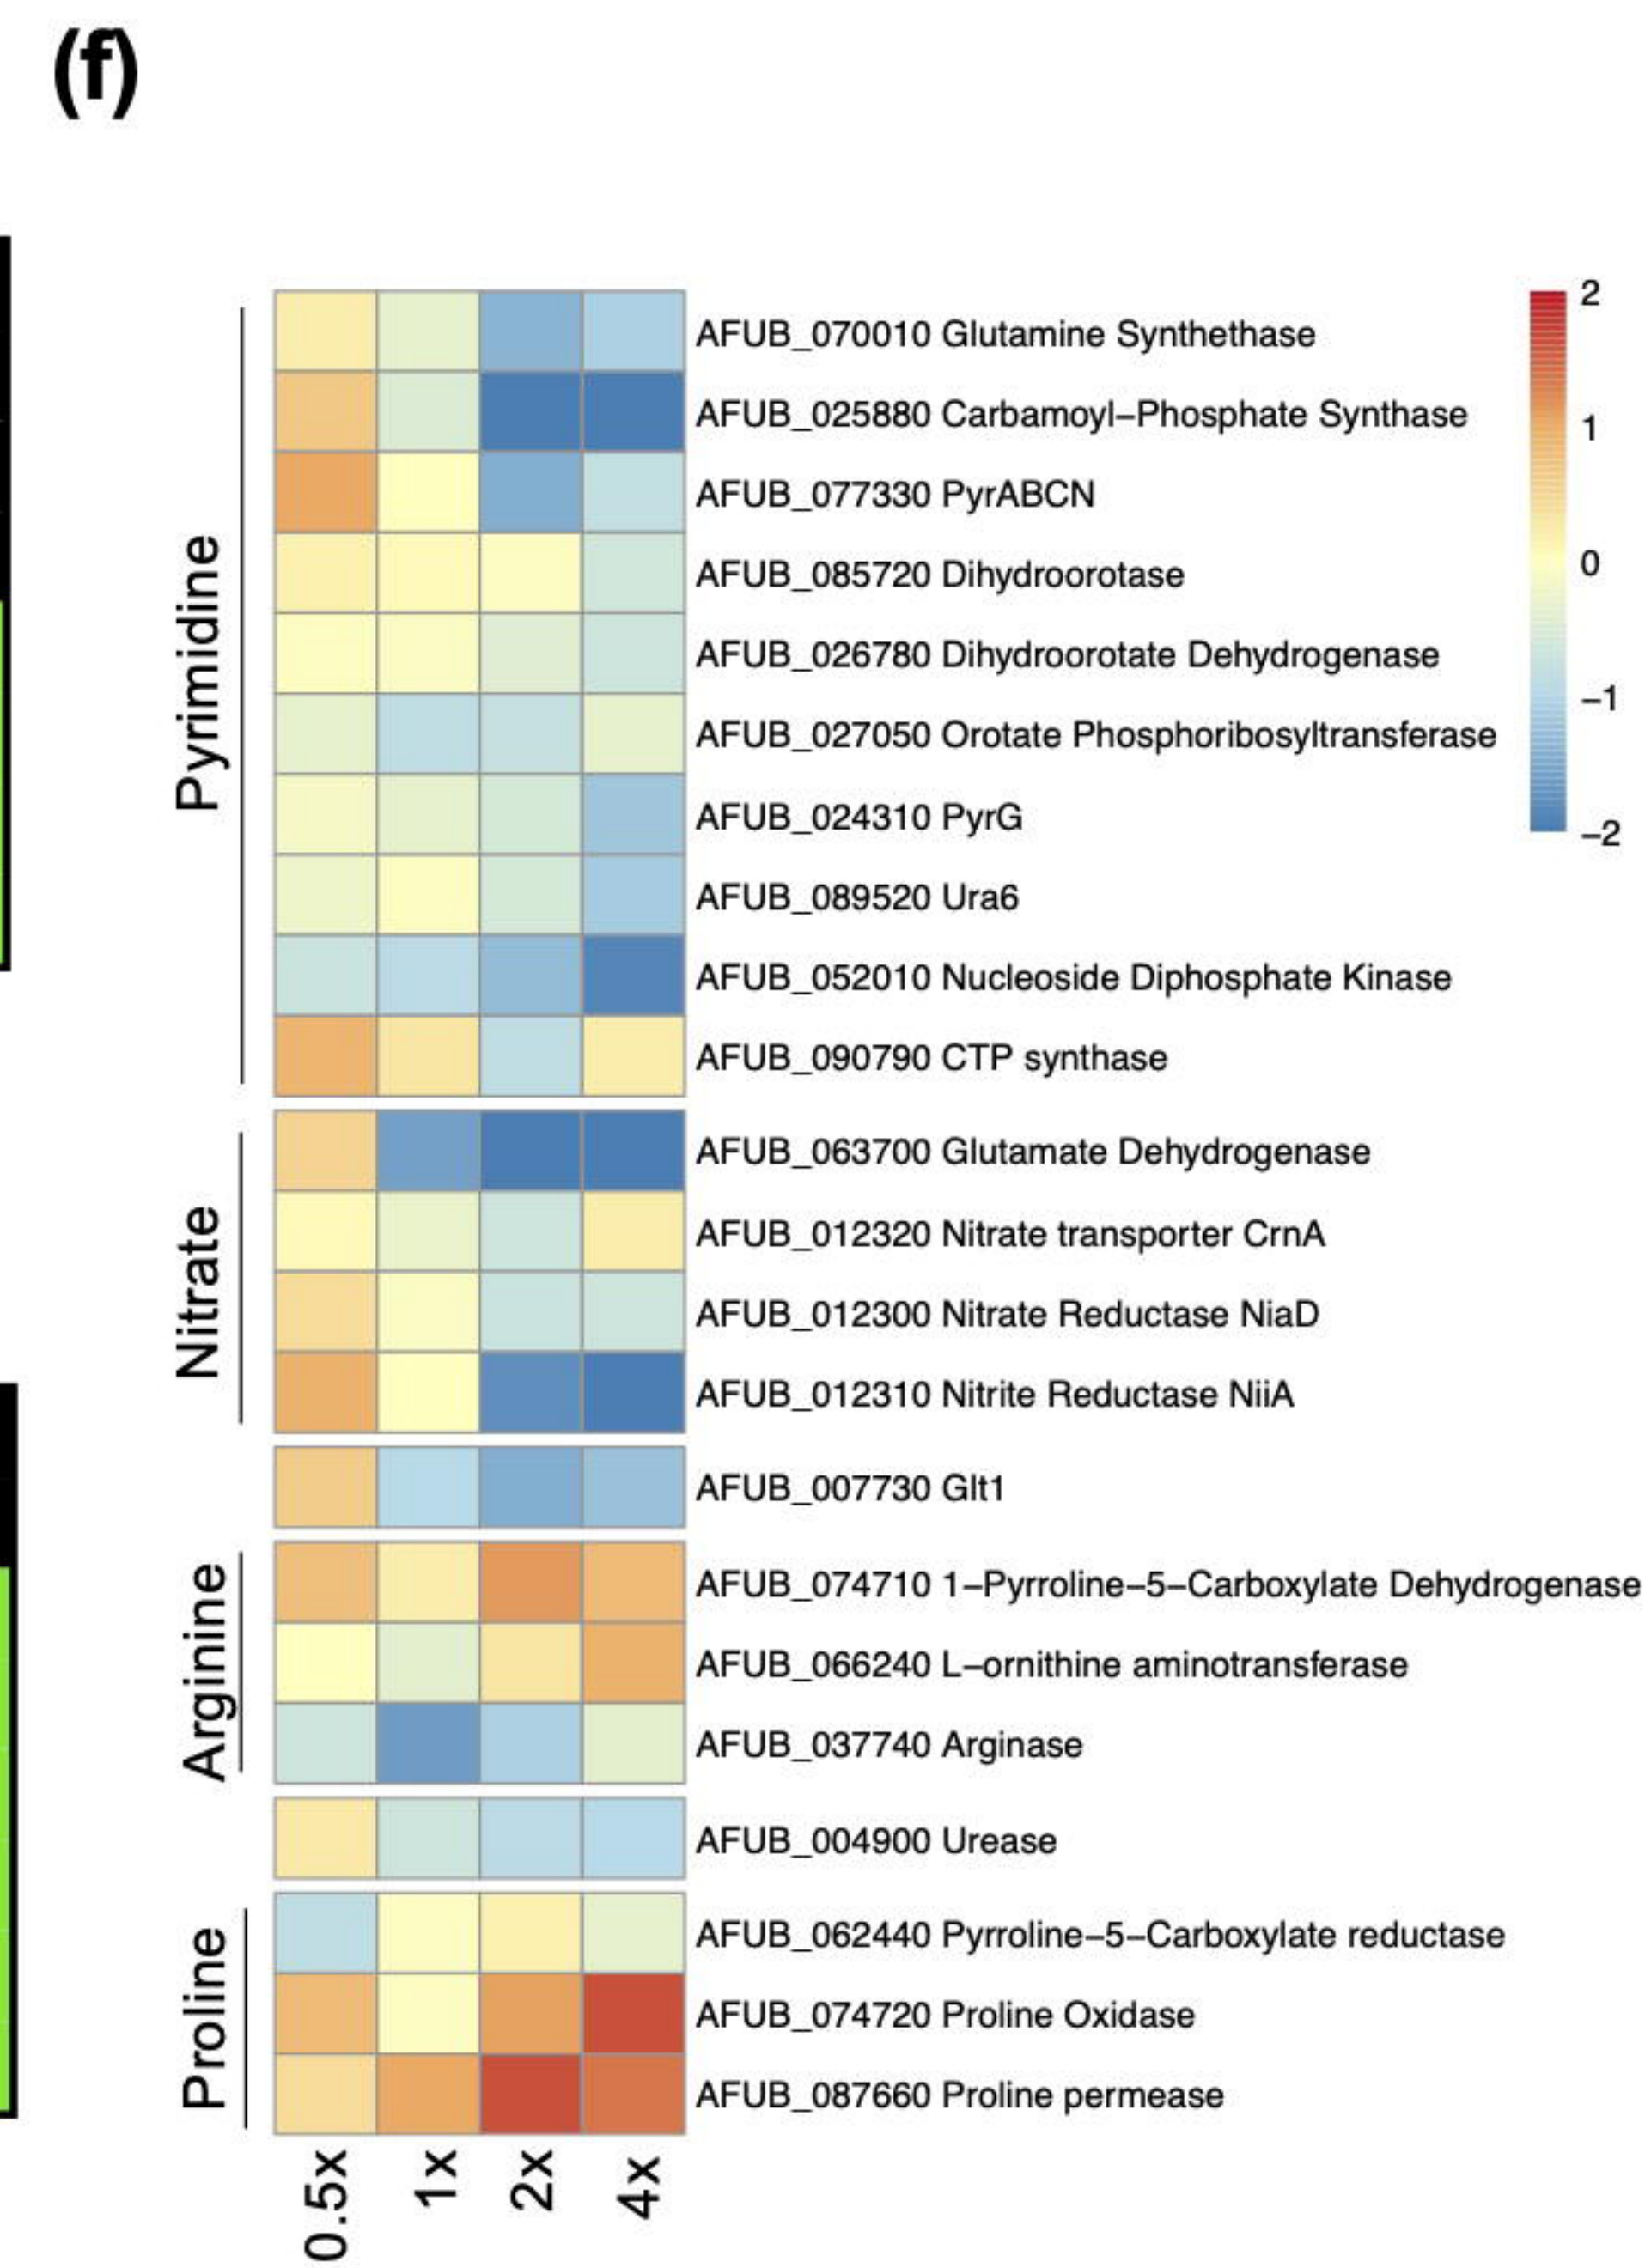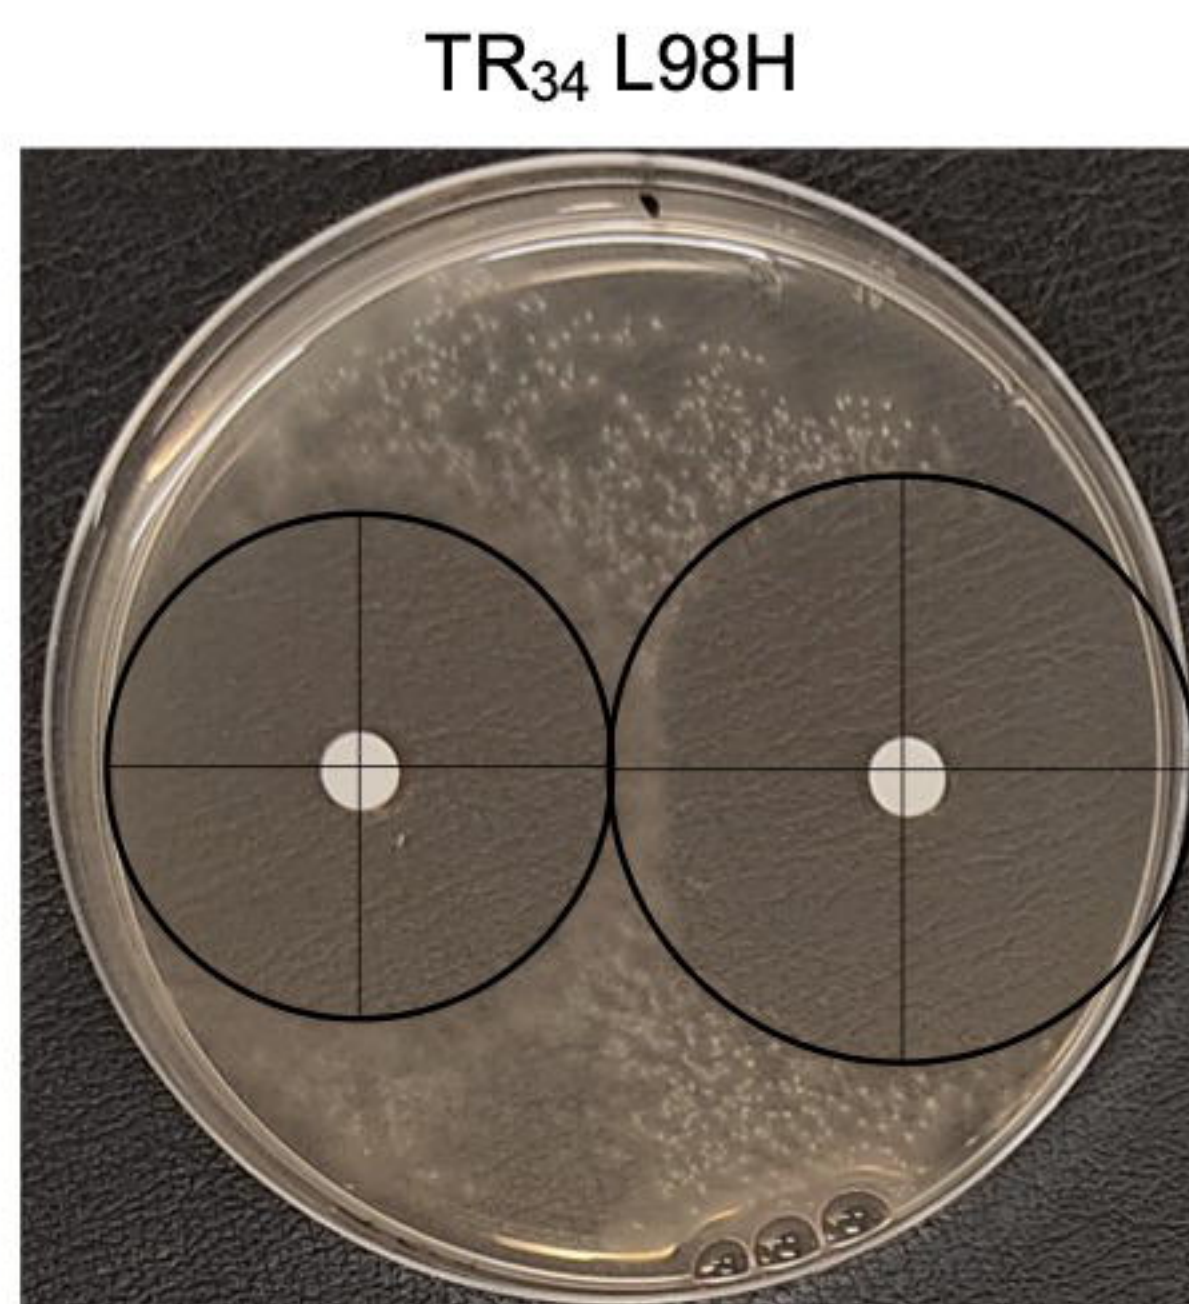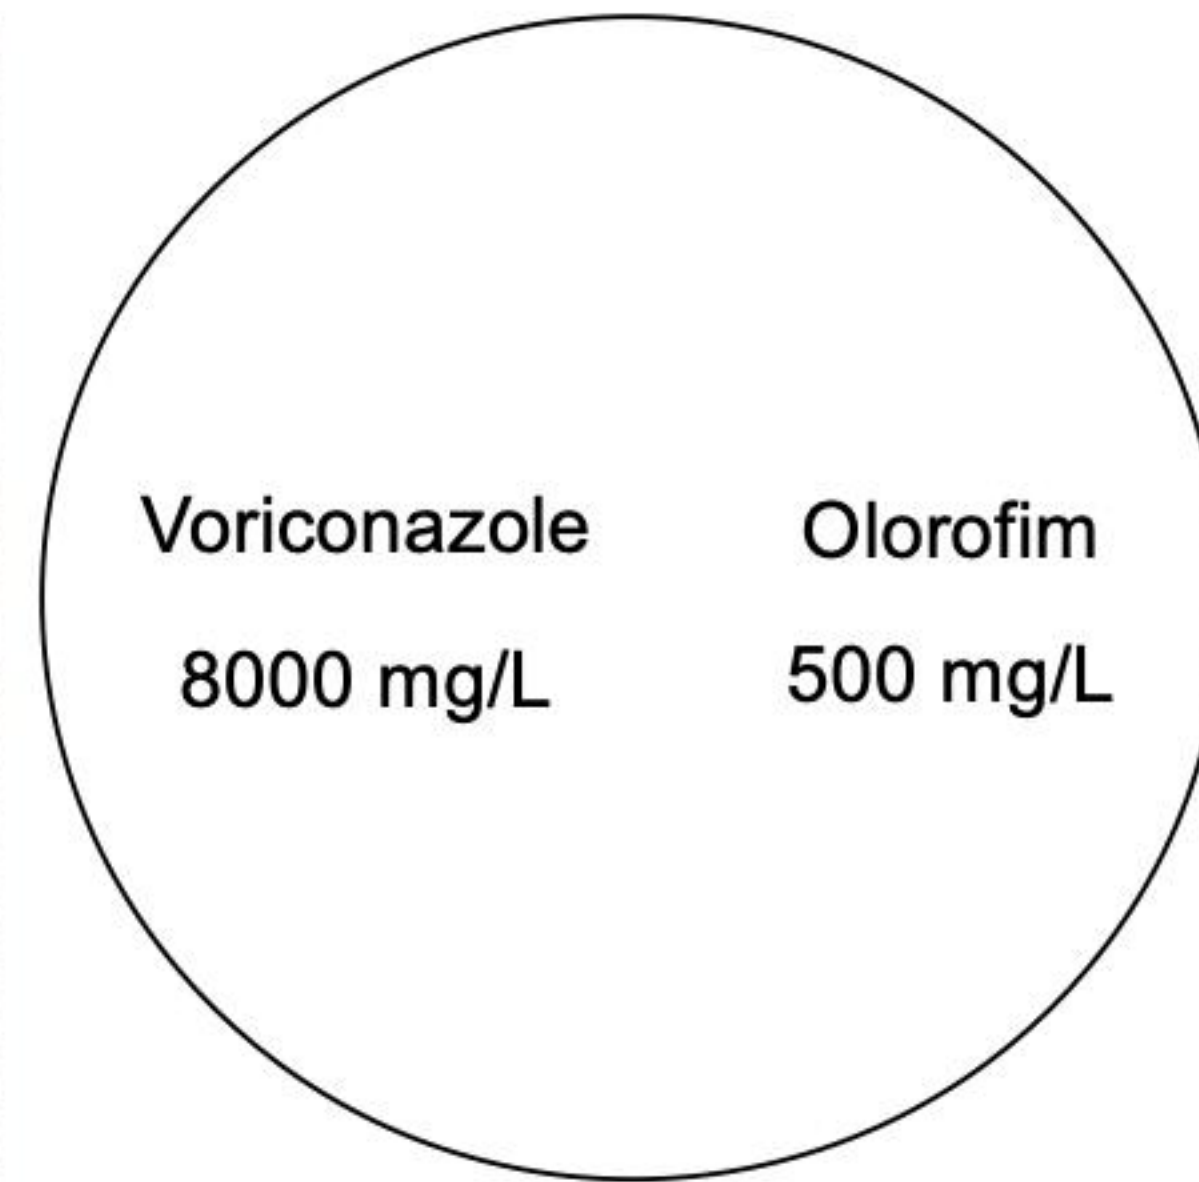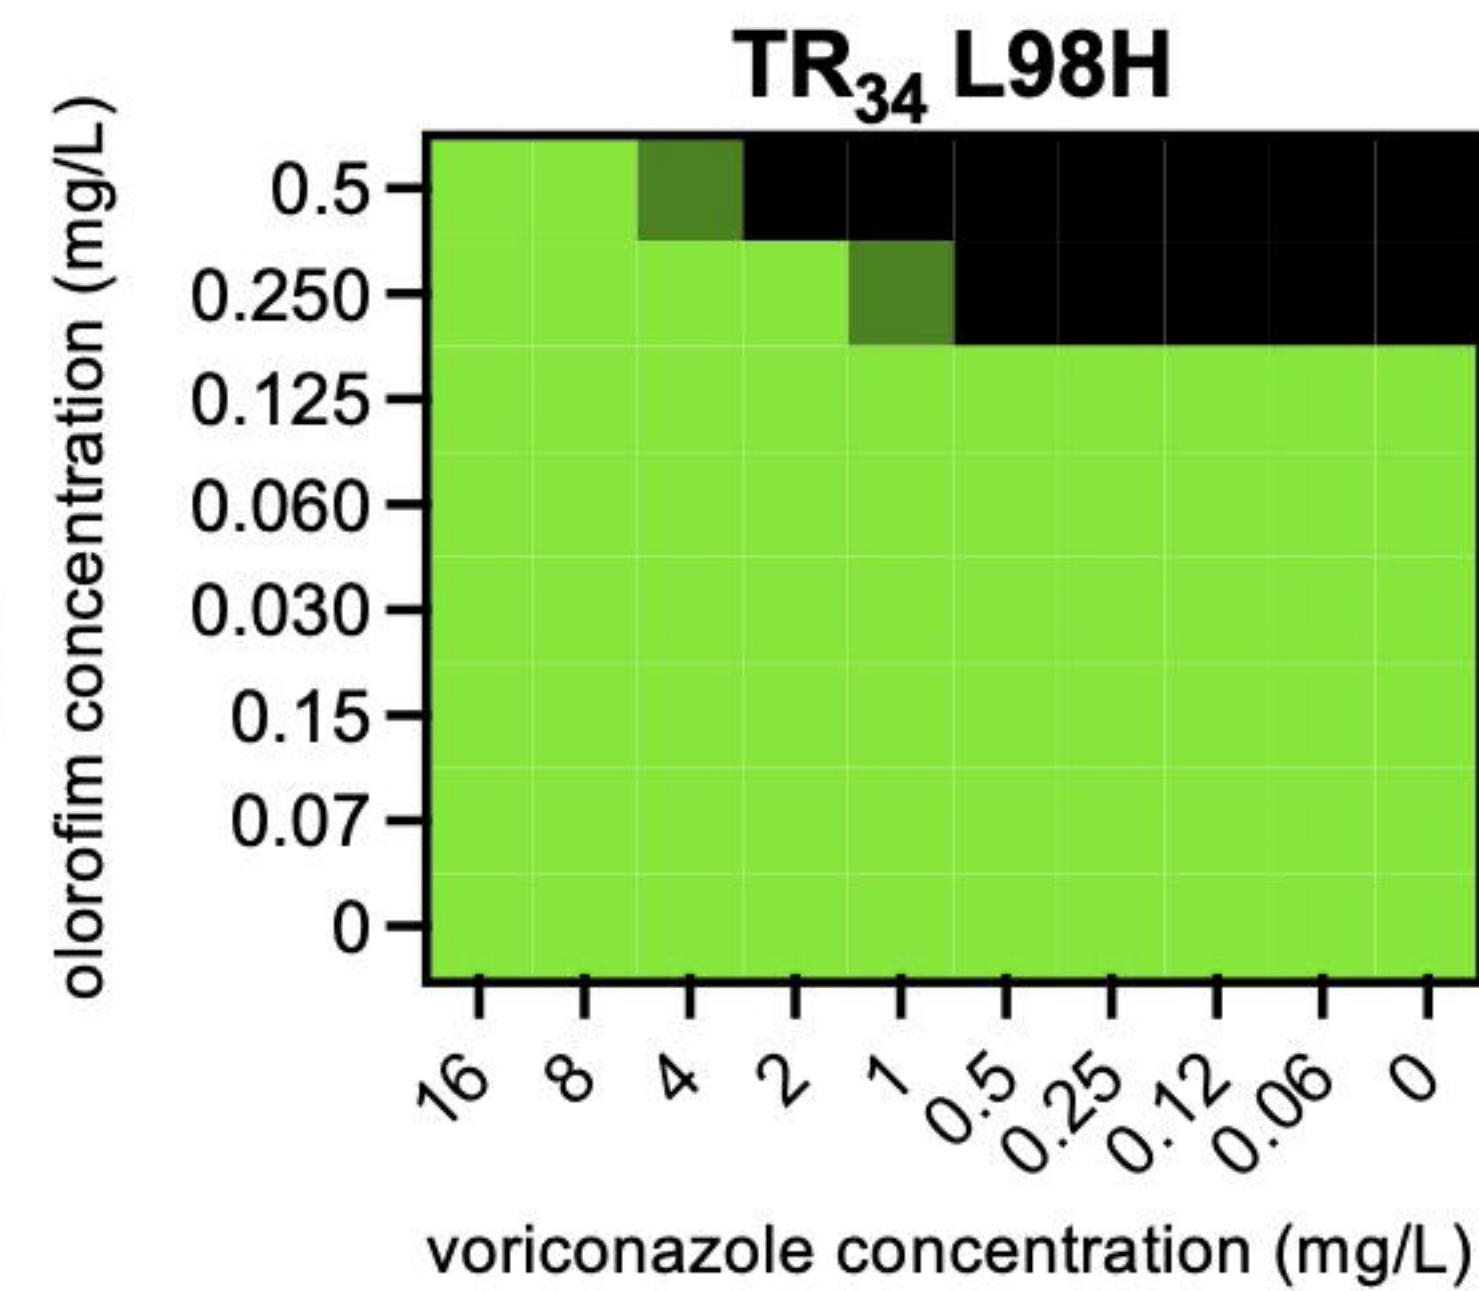



**(a)**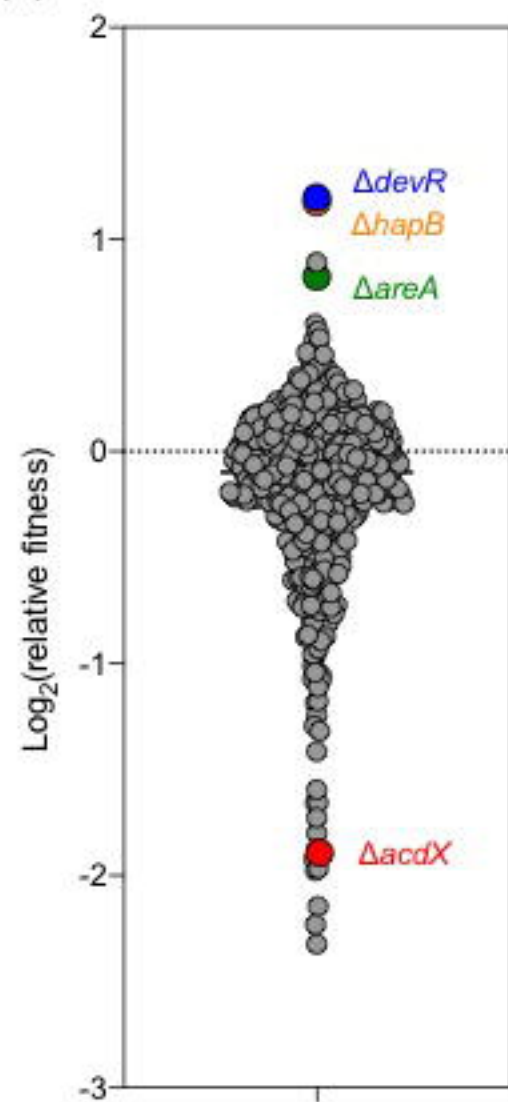**(b)**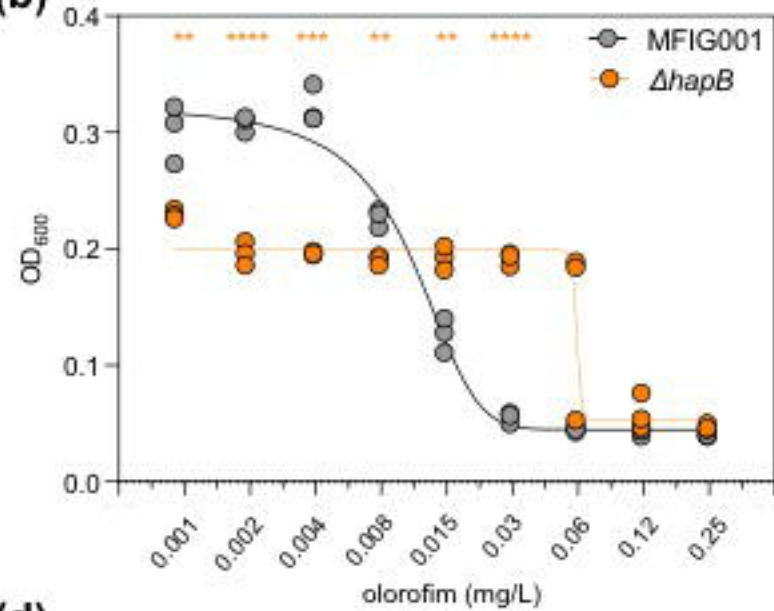**(d)**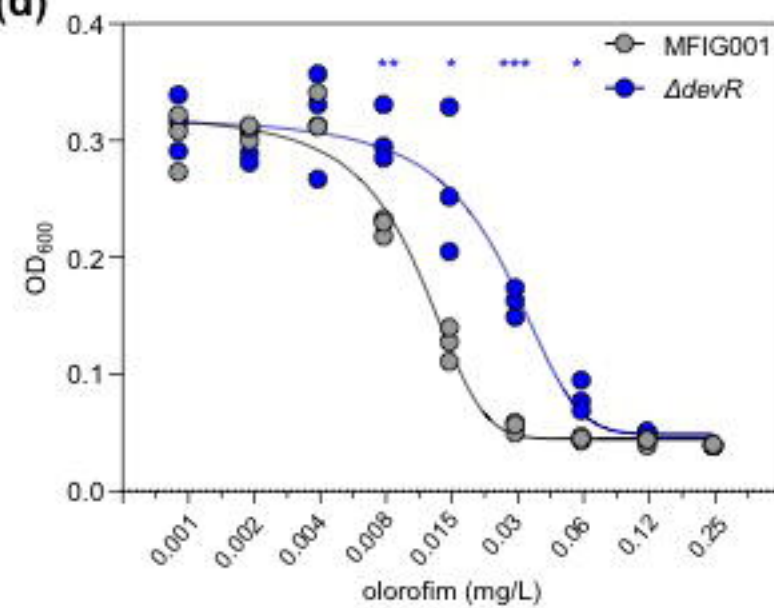**(c)**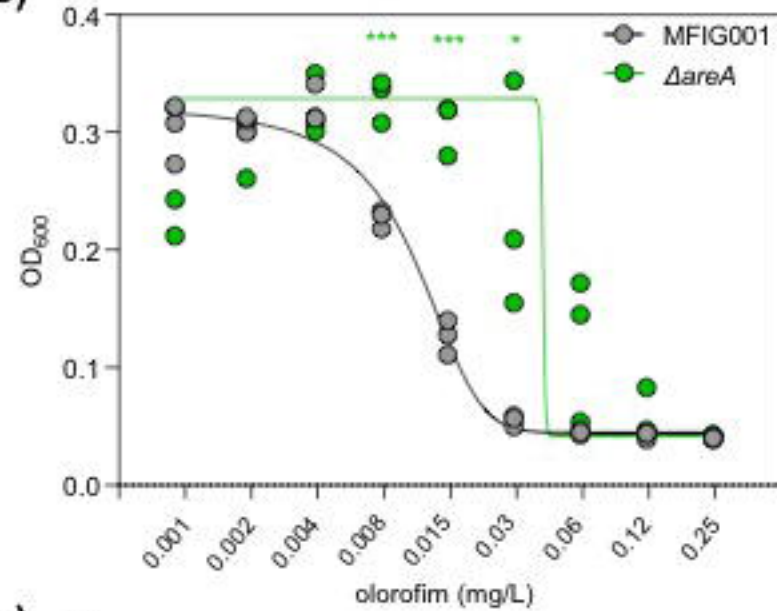**(e)**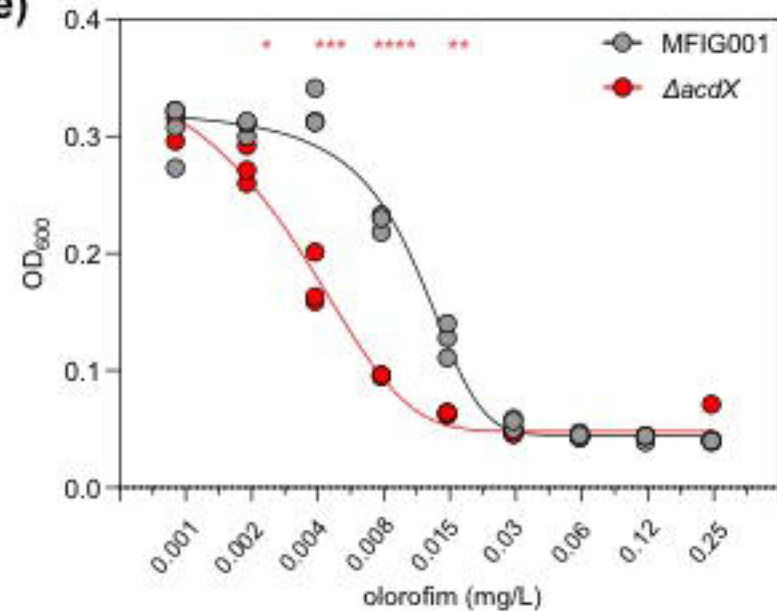



**(a)**

MFIG001

 $\Delta hapB$  $\Delta devR$  $\Delta acdX$  $\Delta areA$ 

ACM

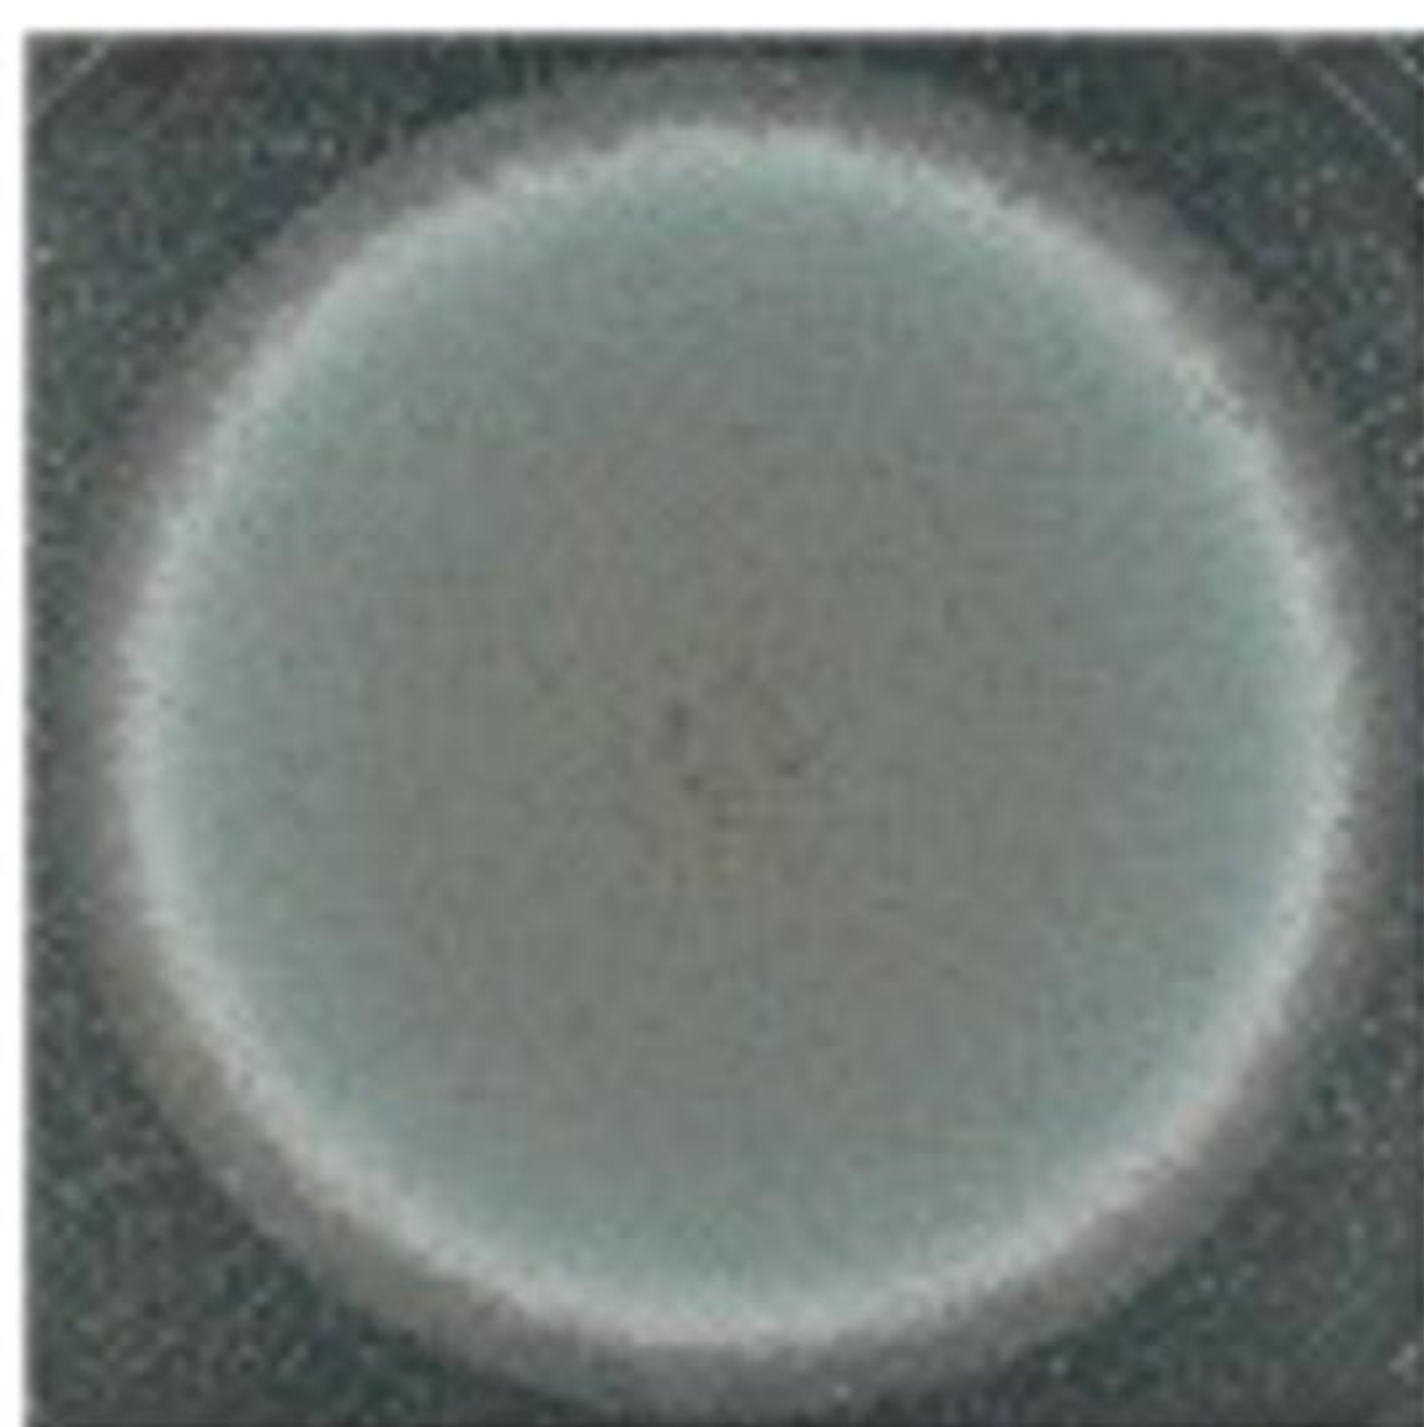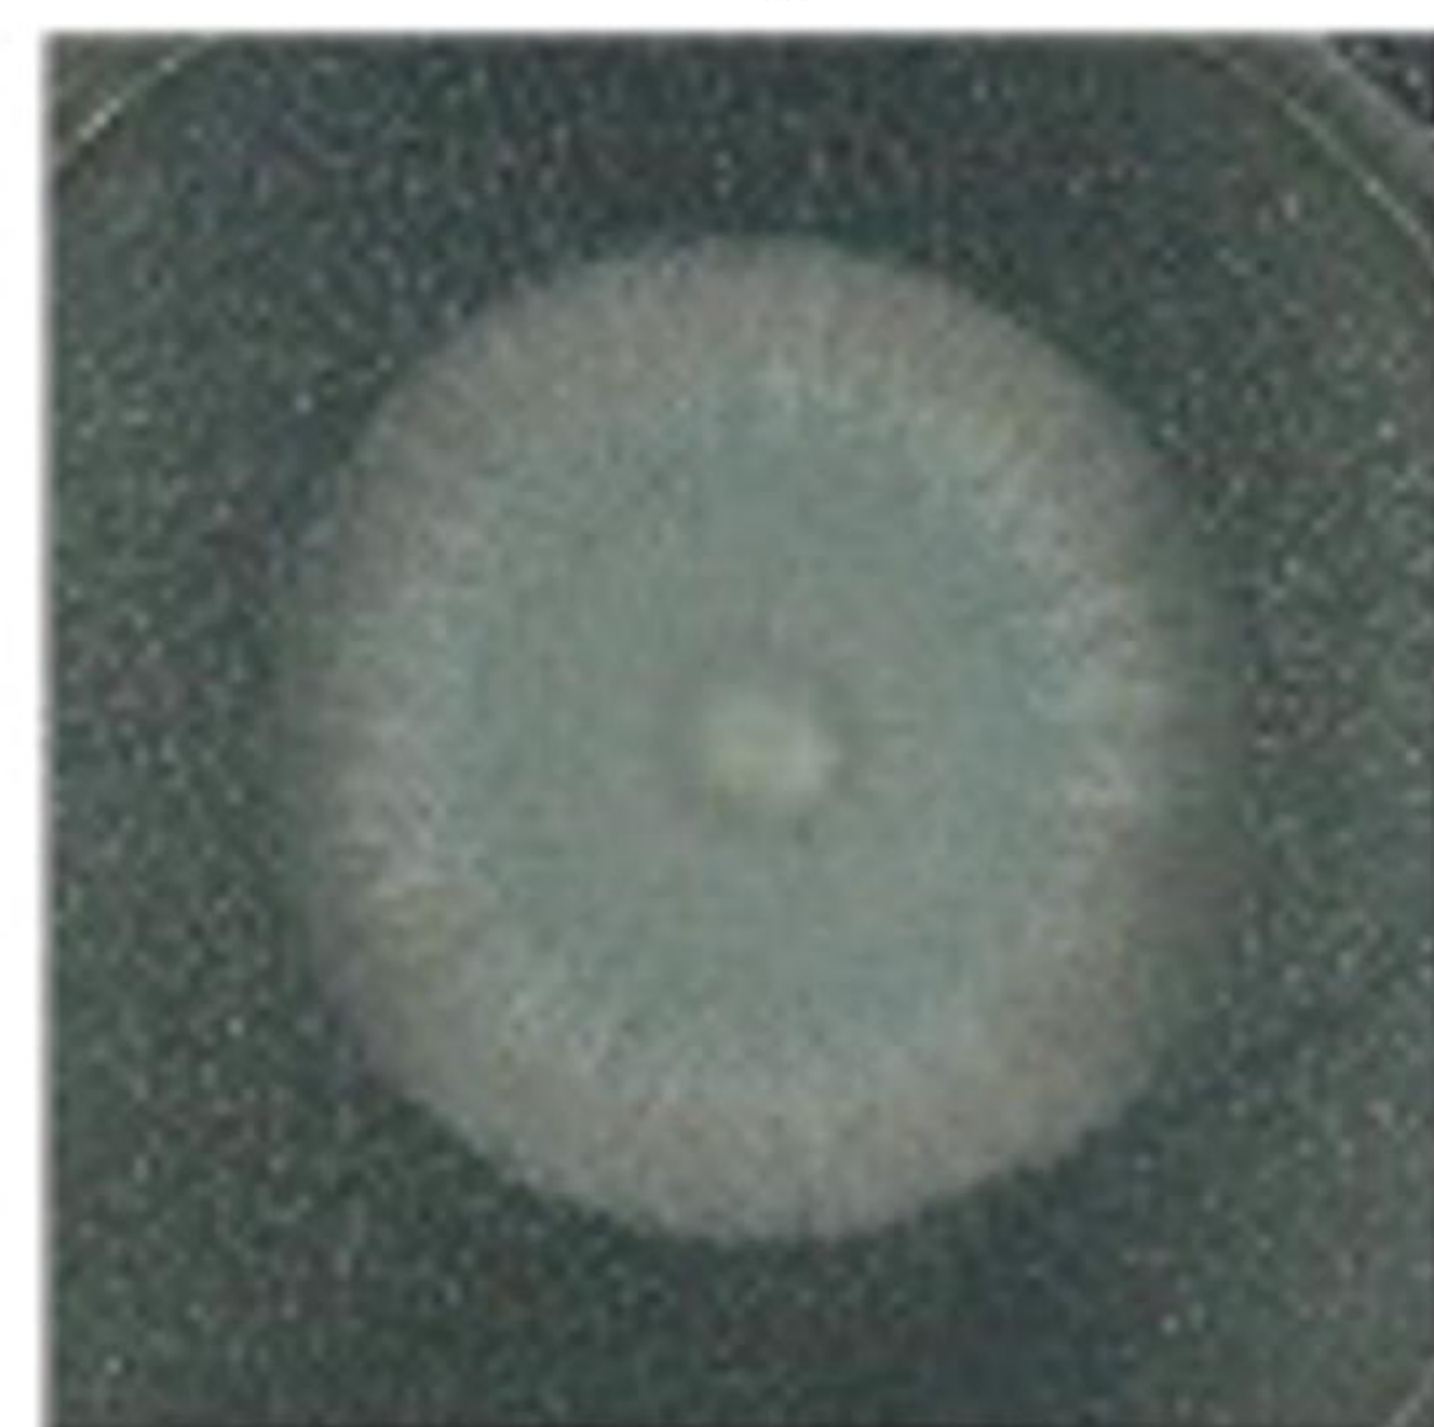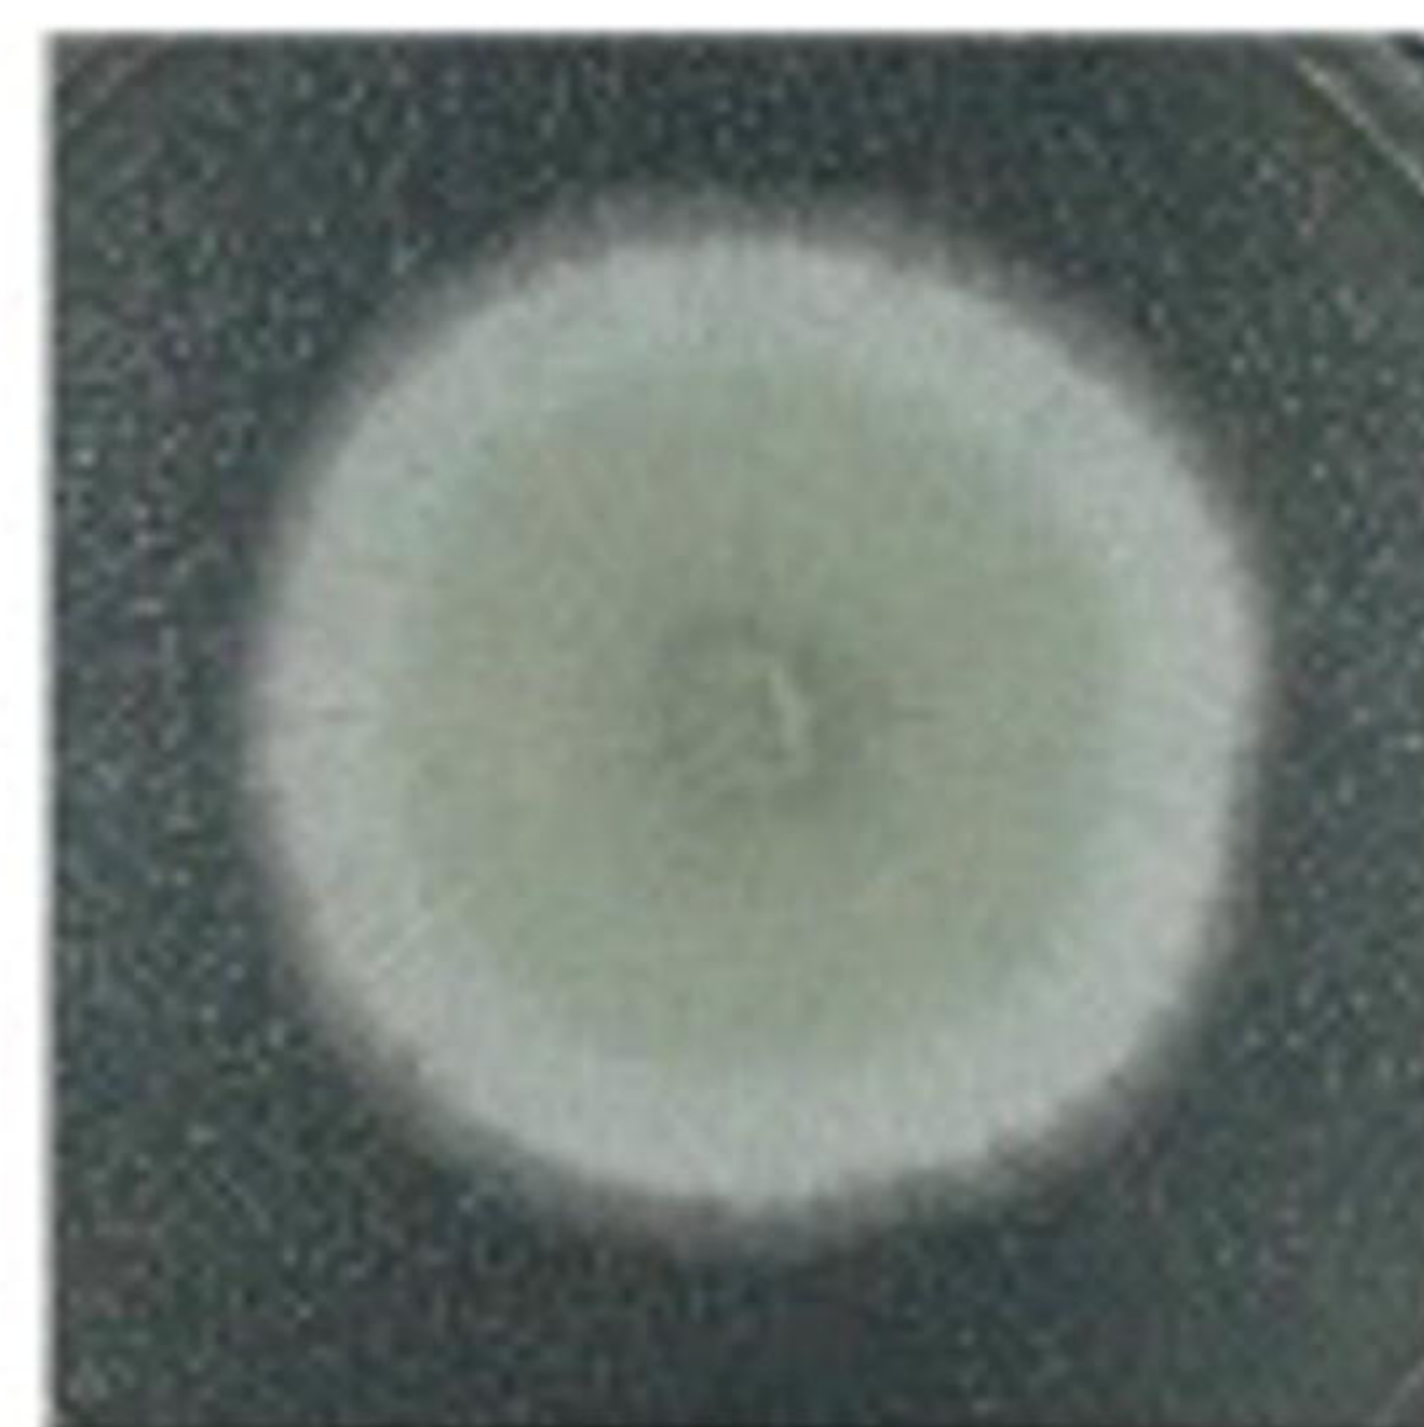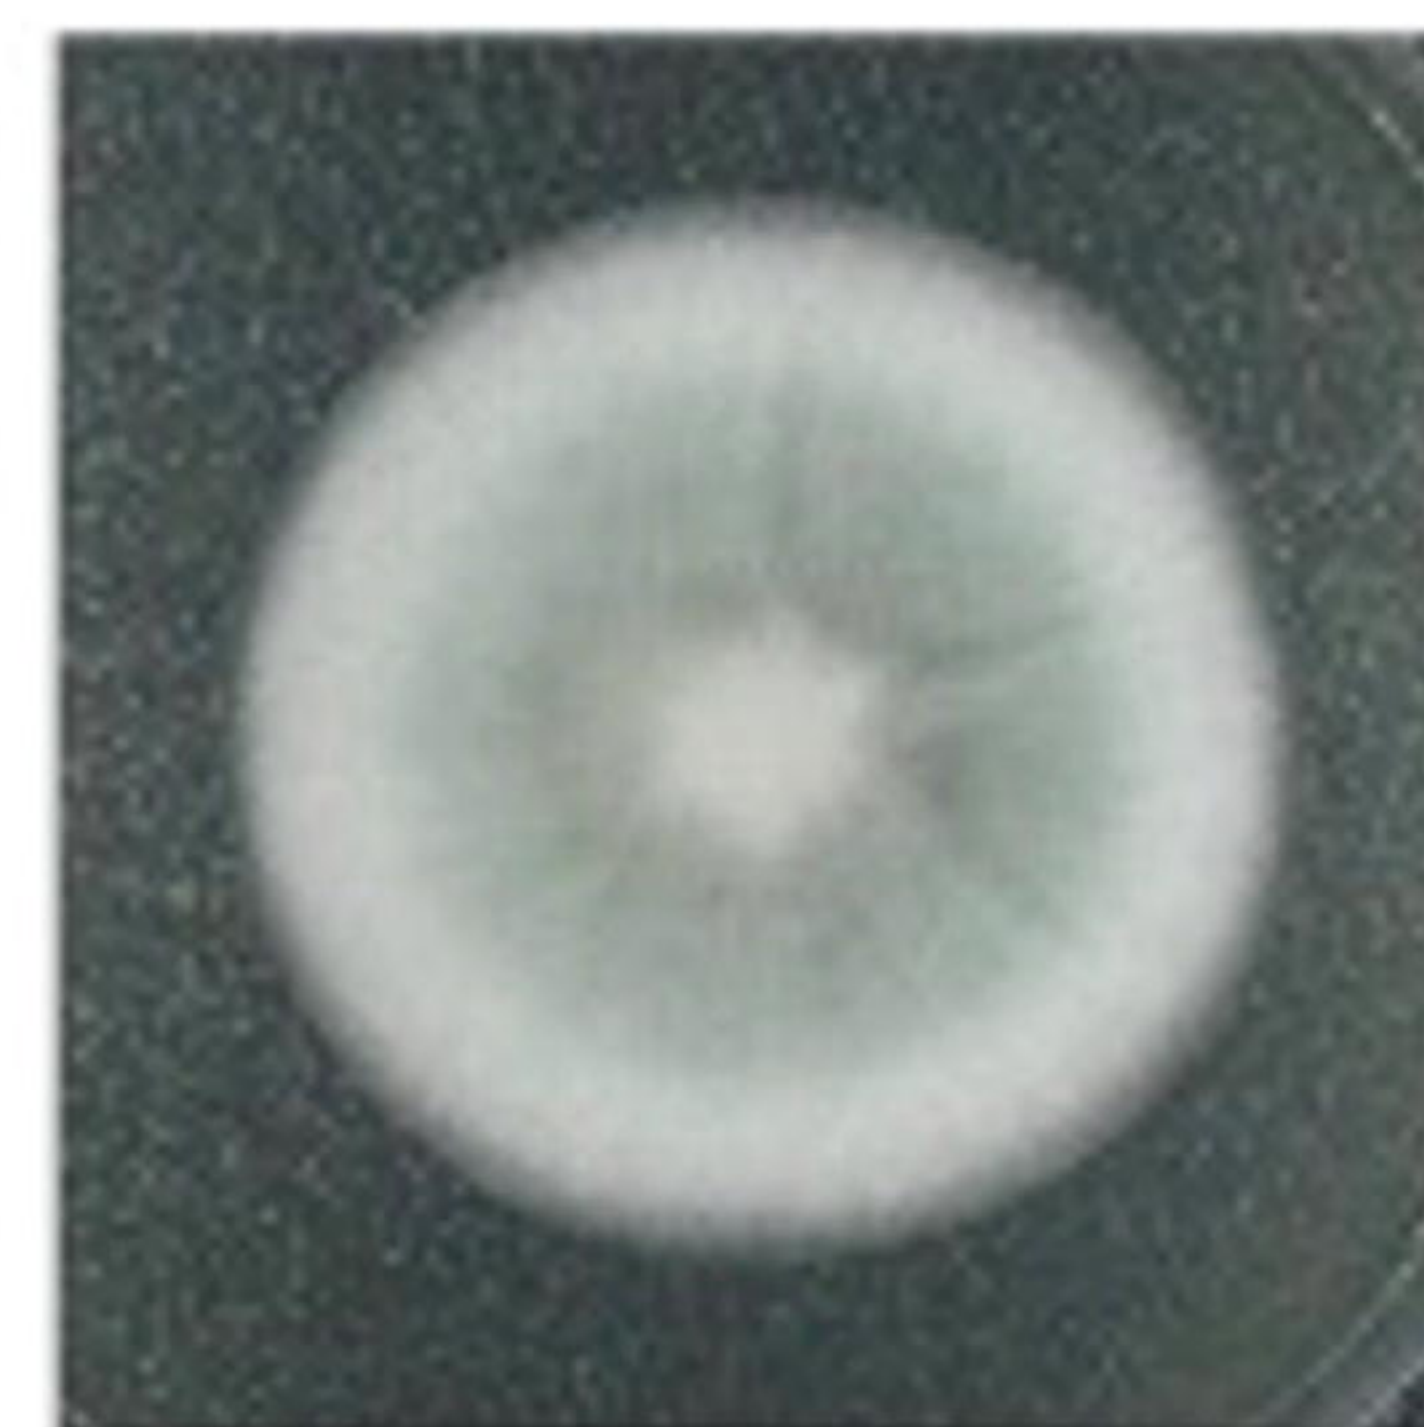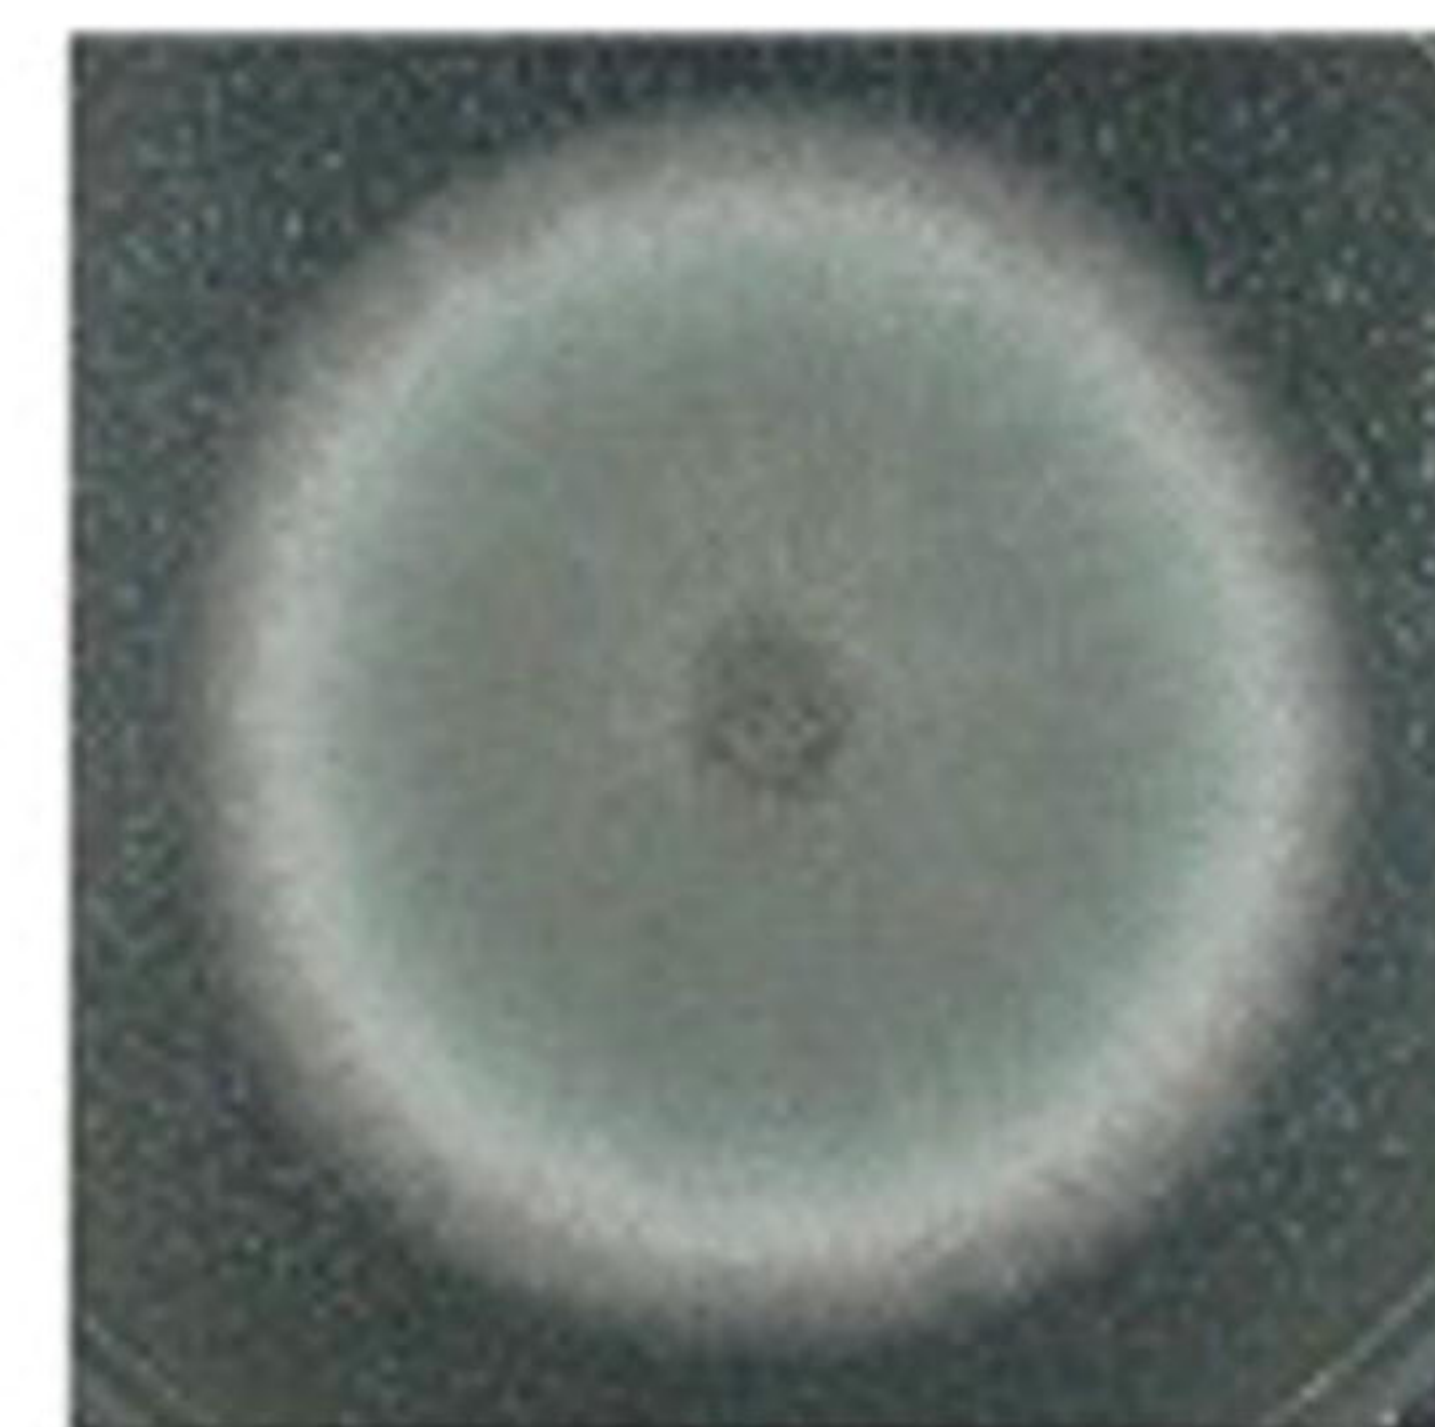

AMM

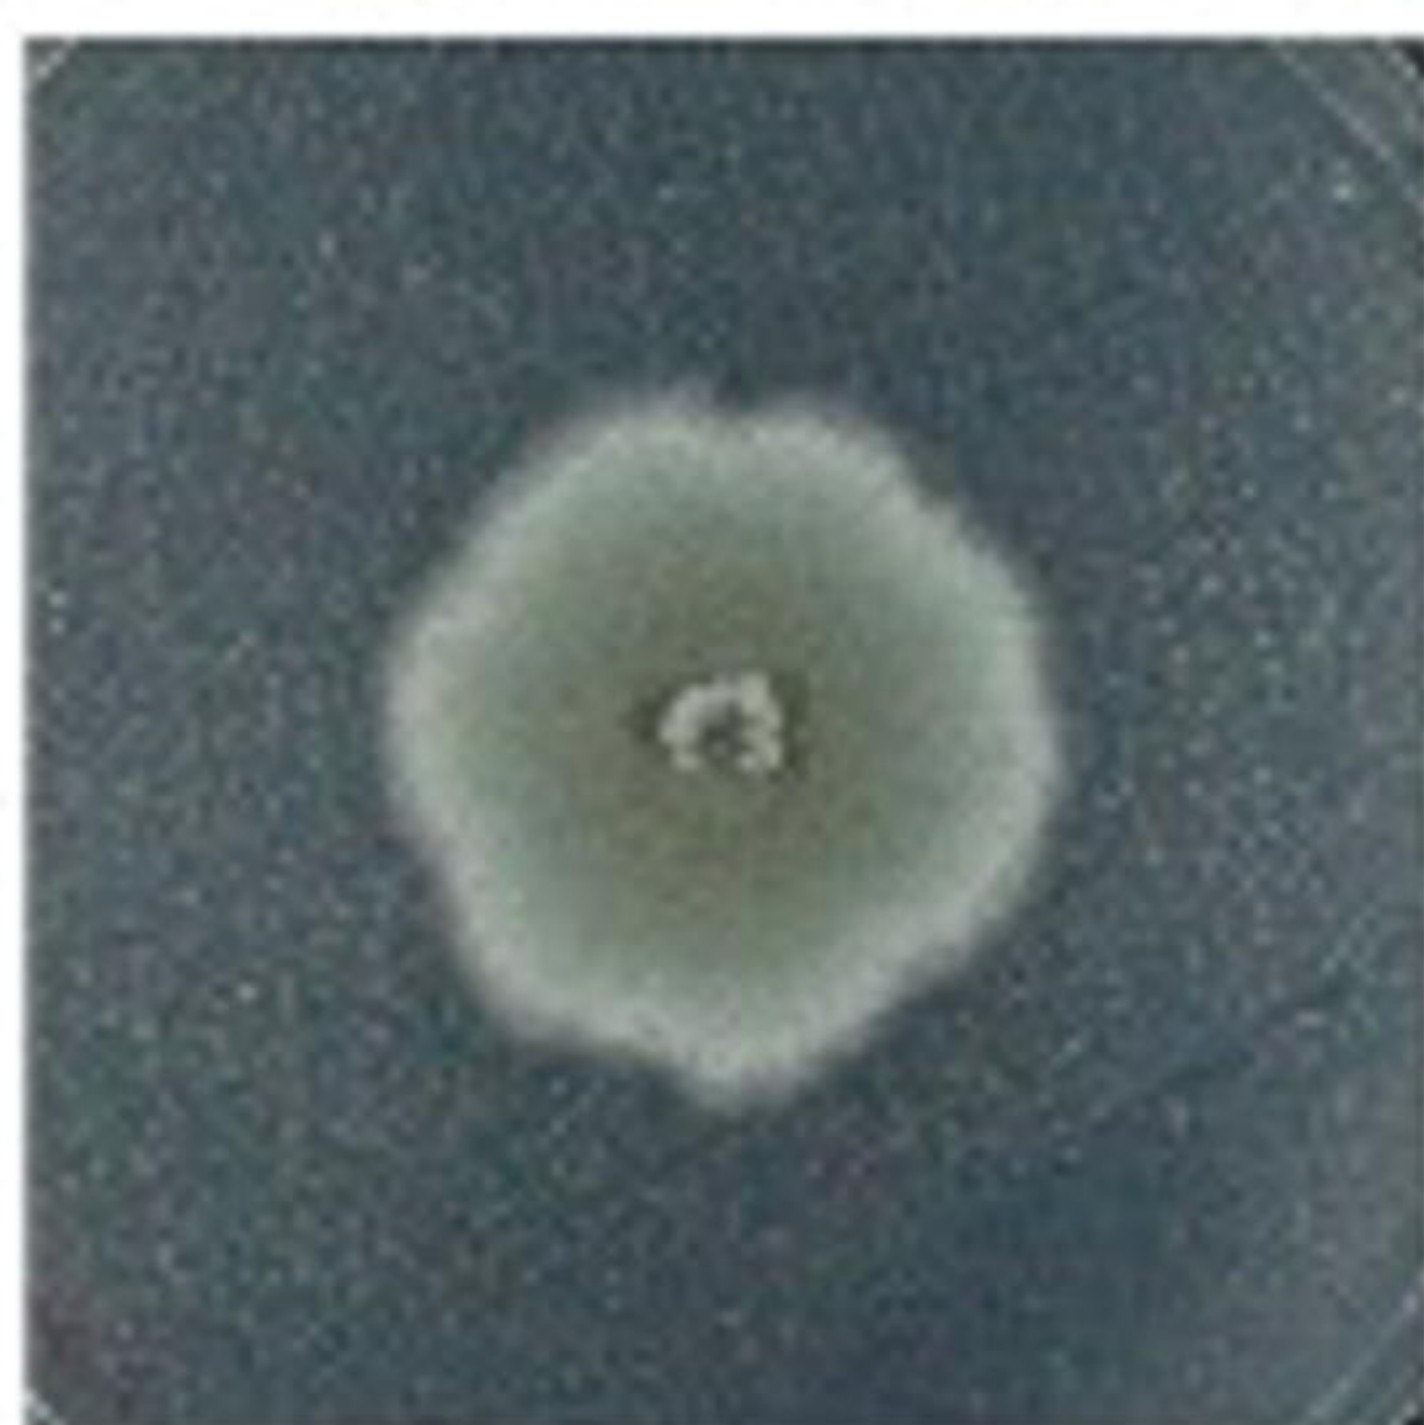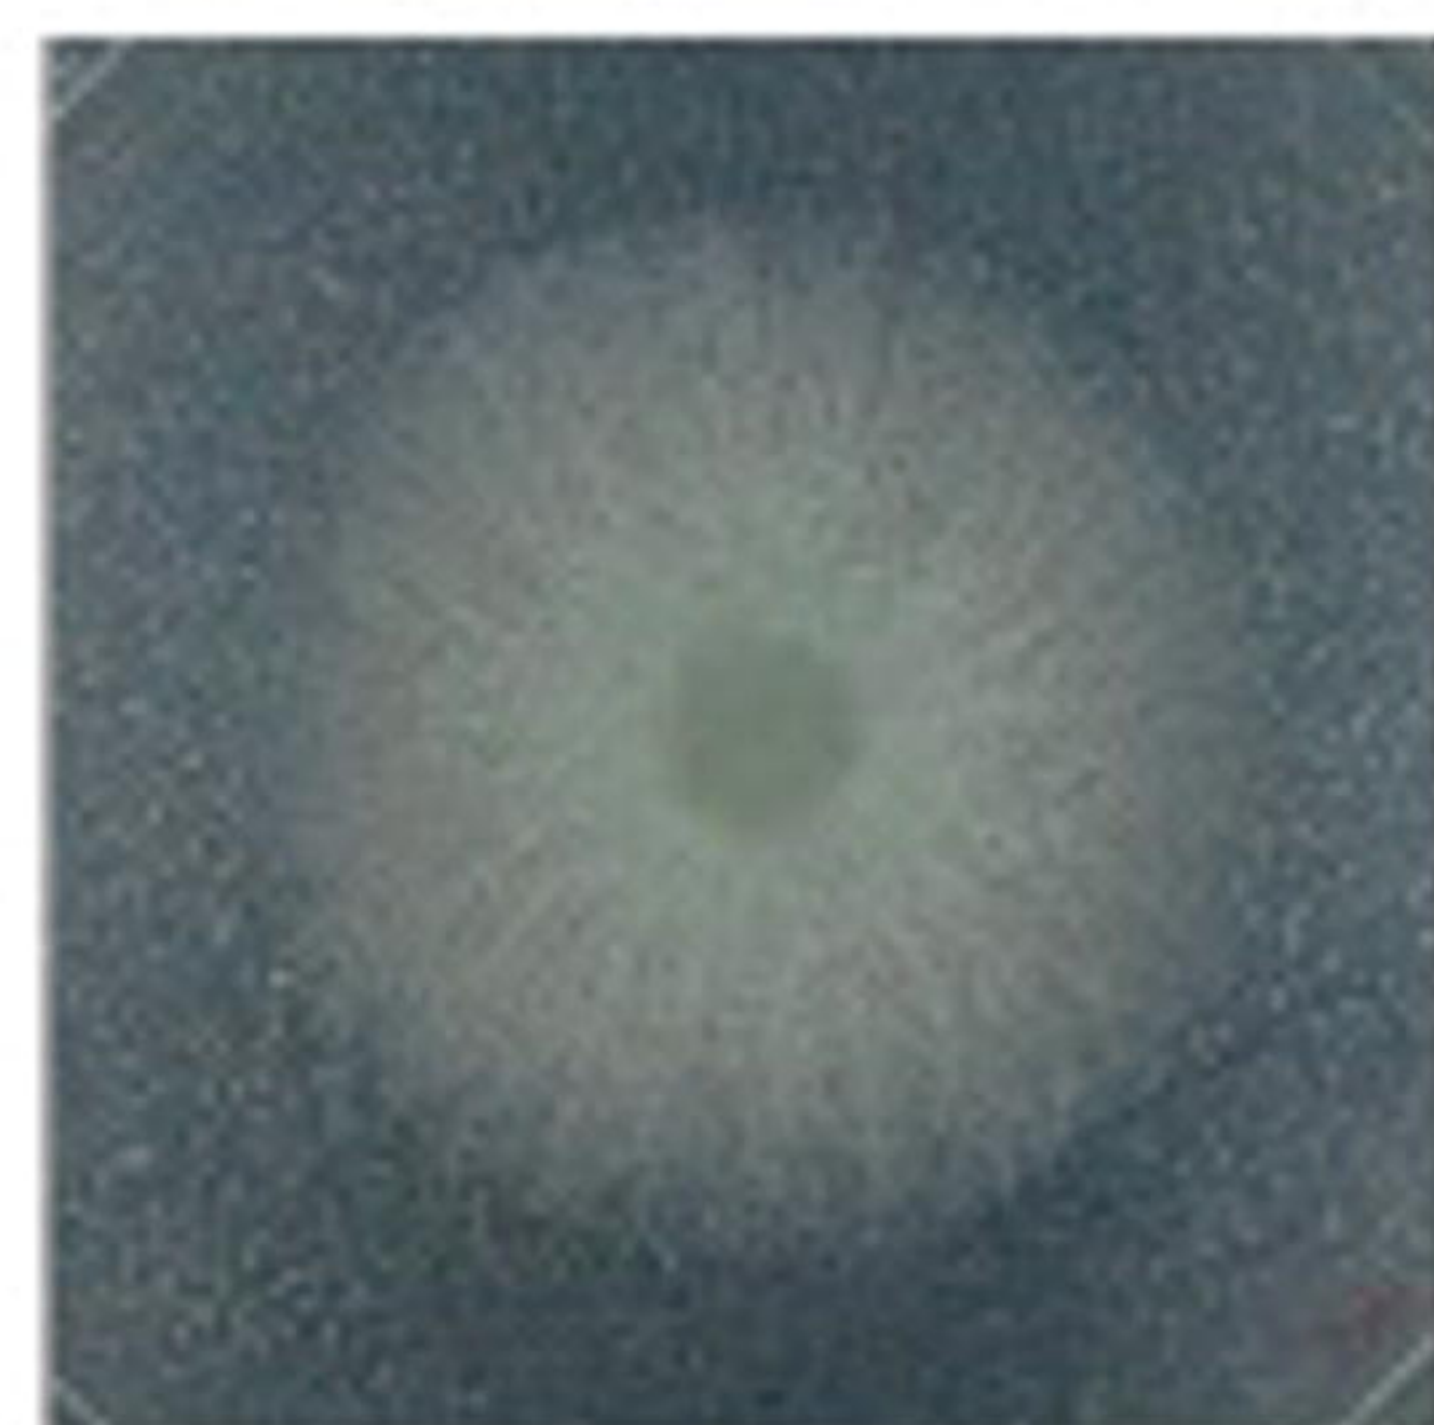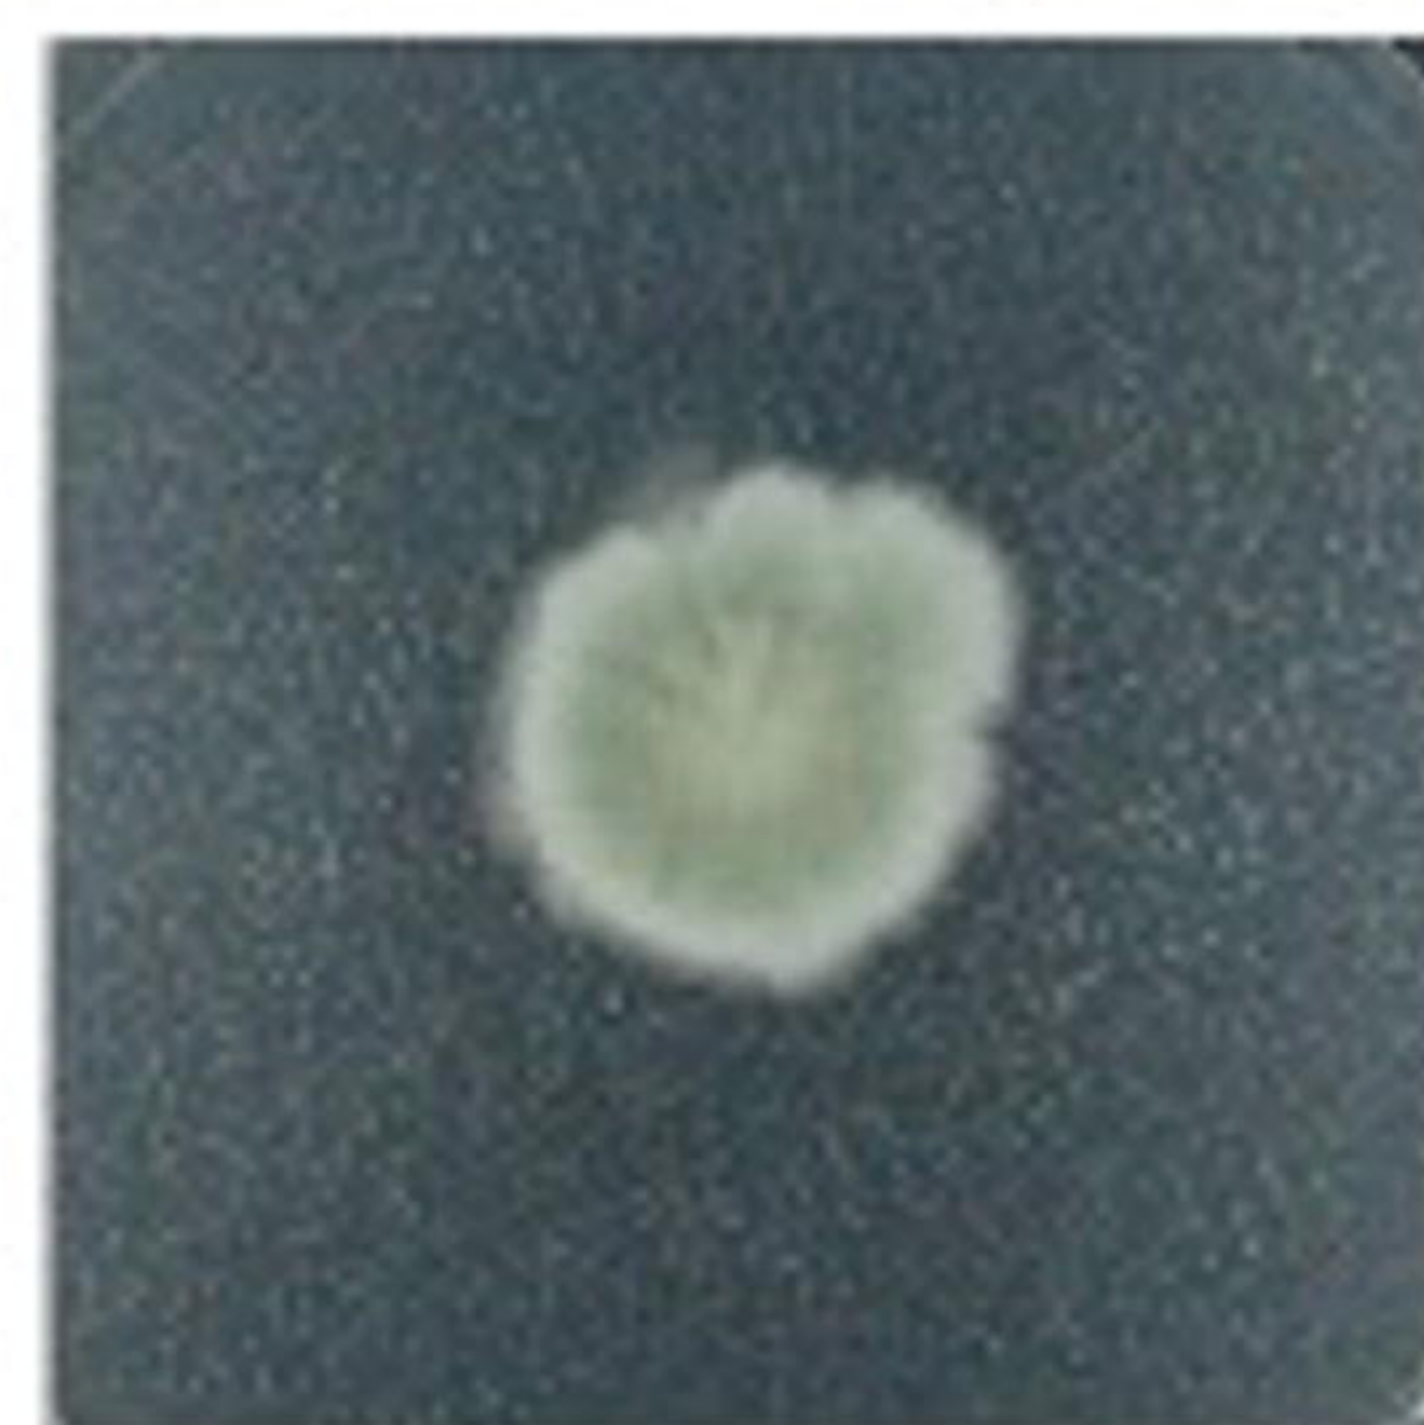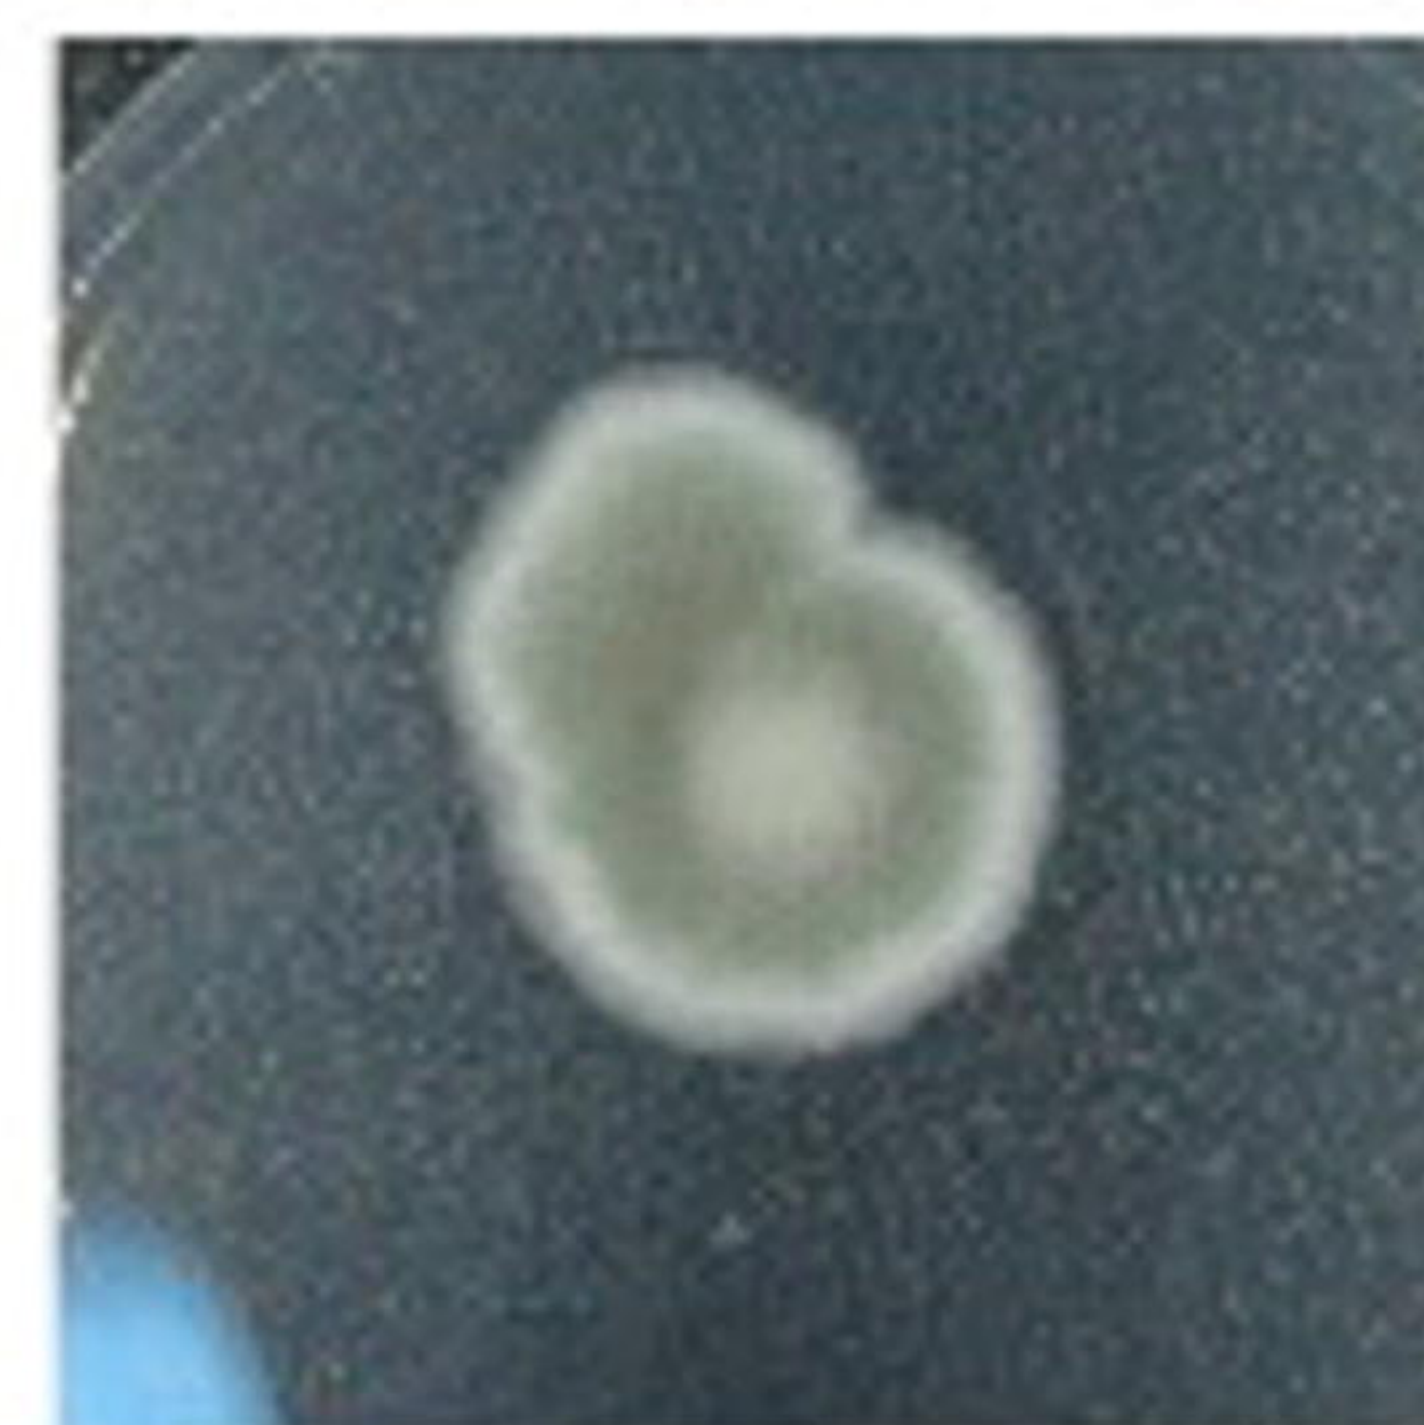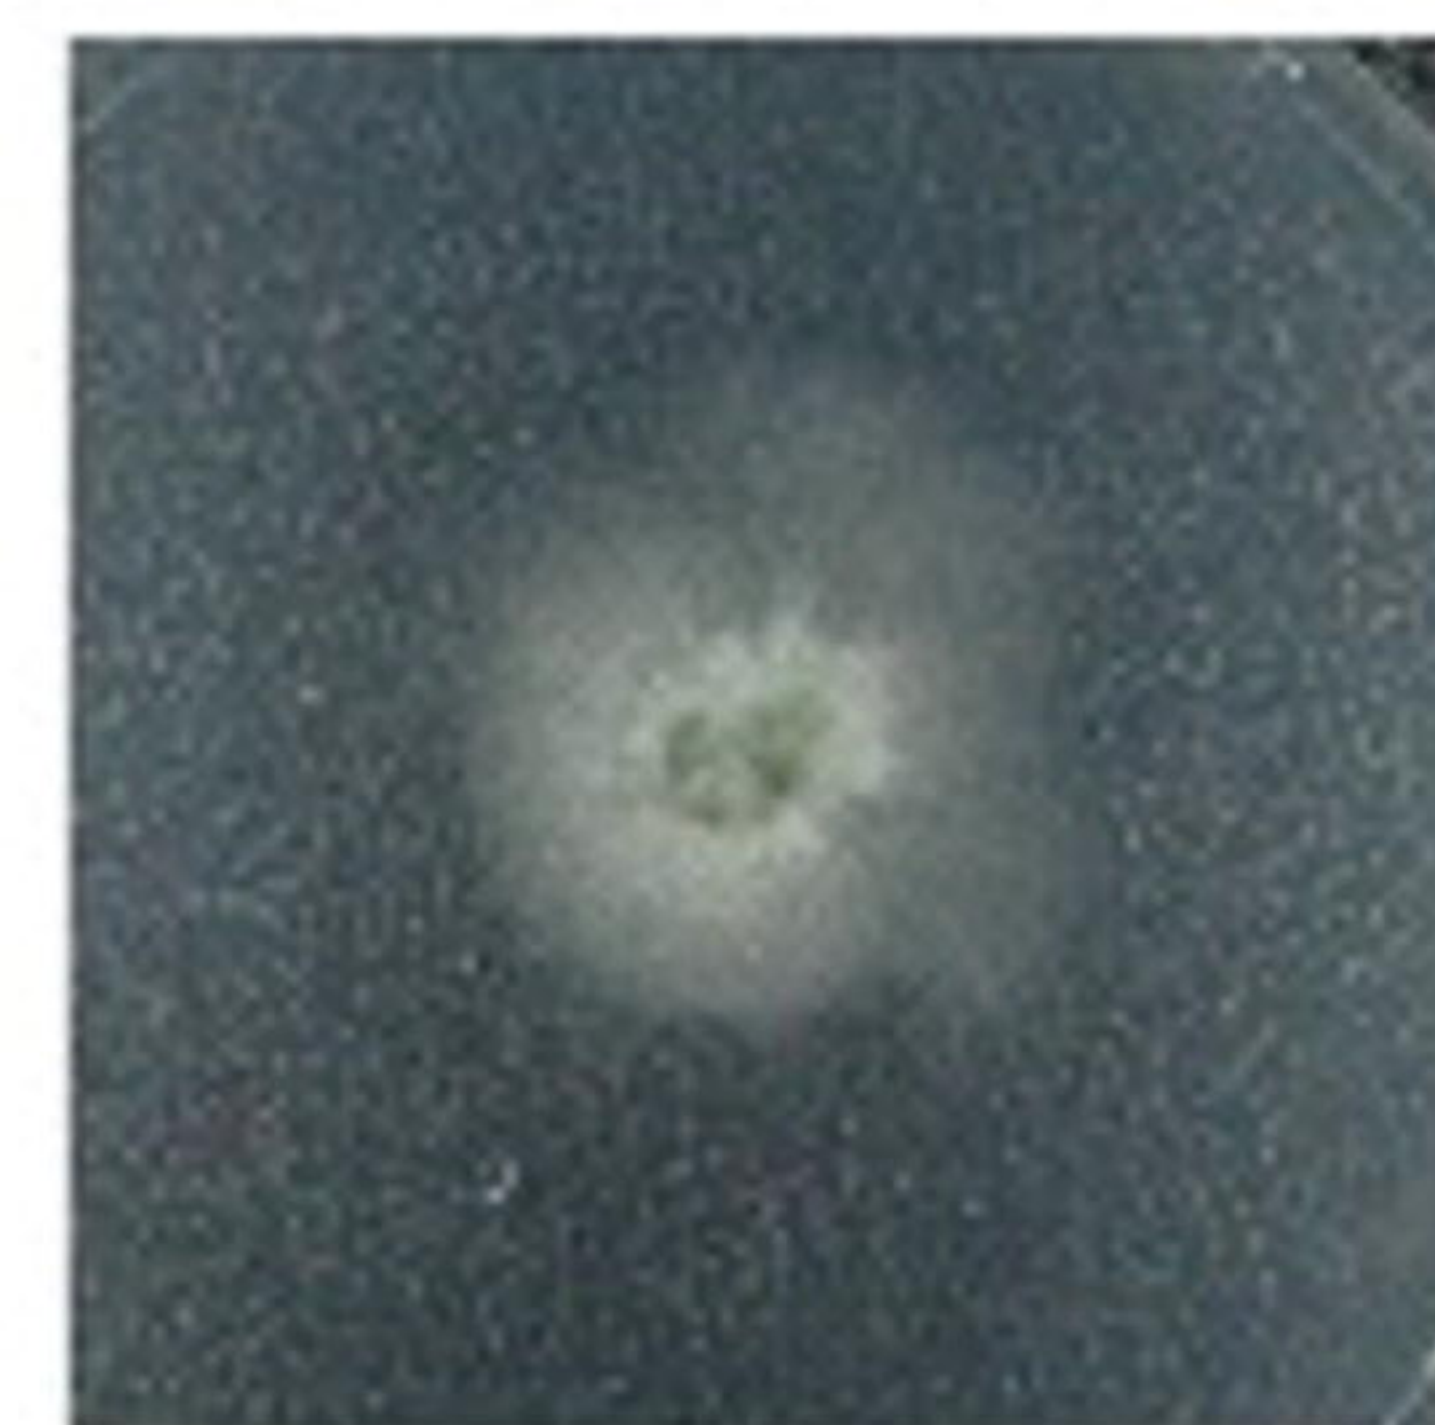**(b)**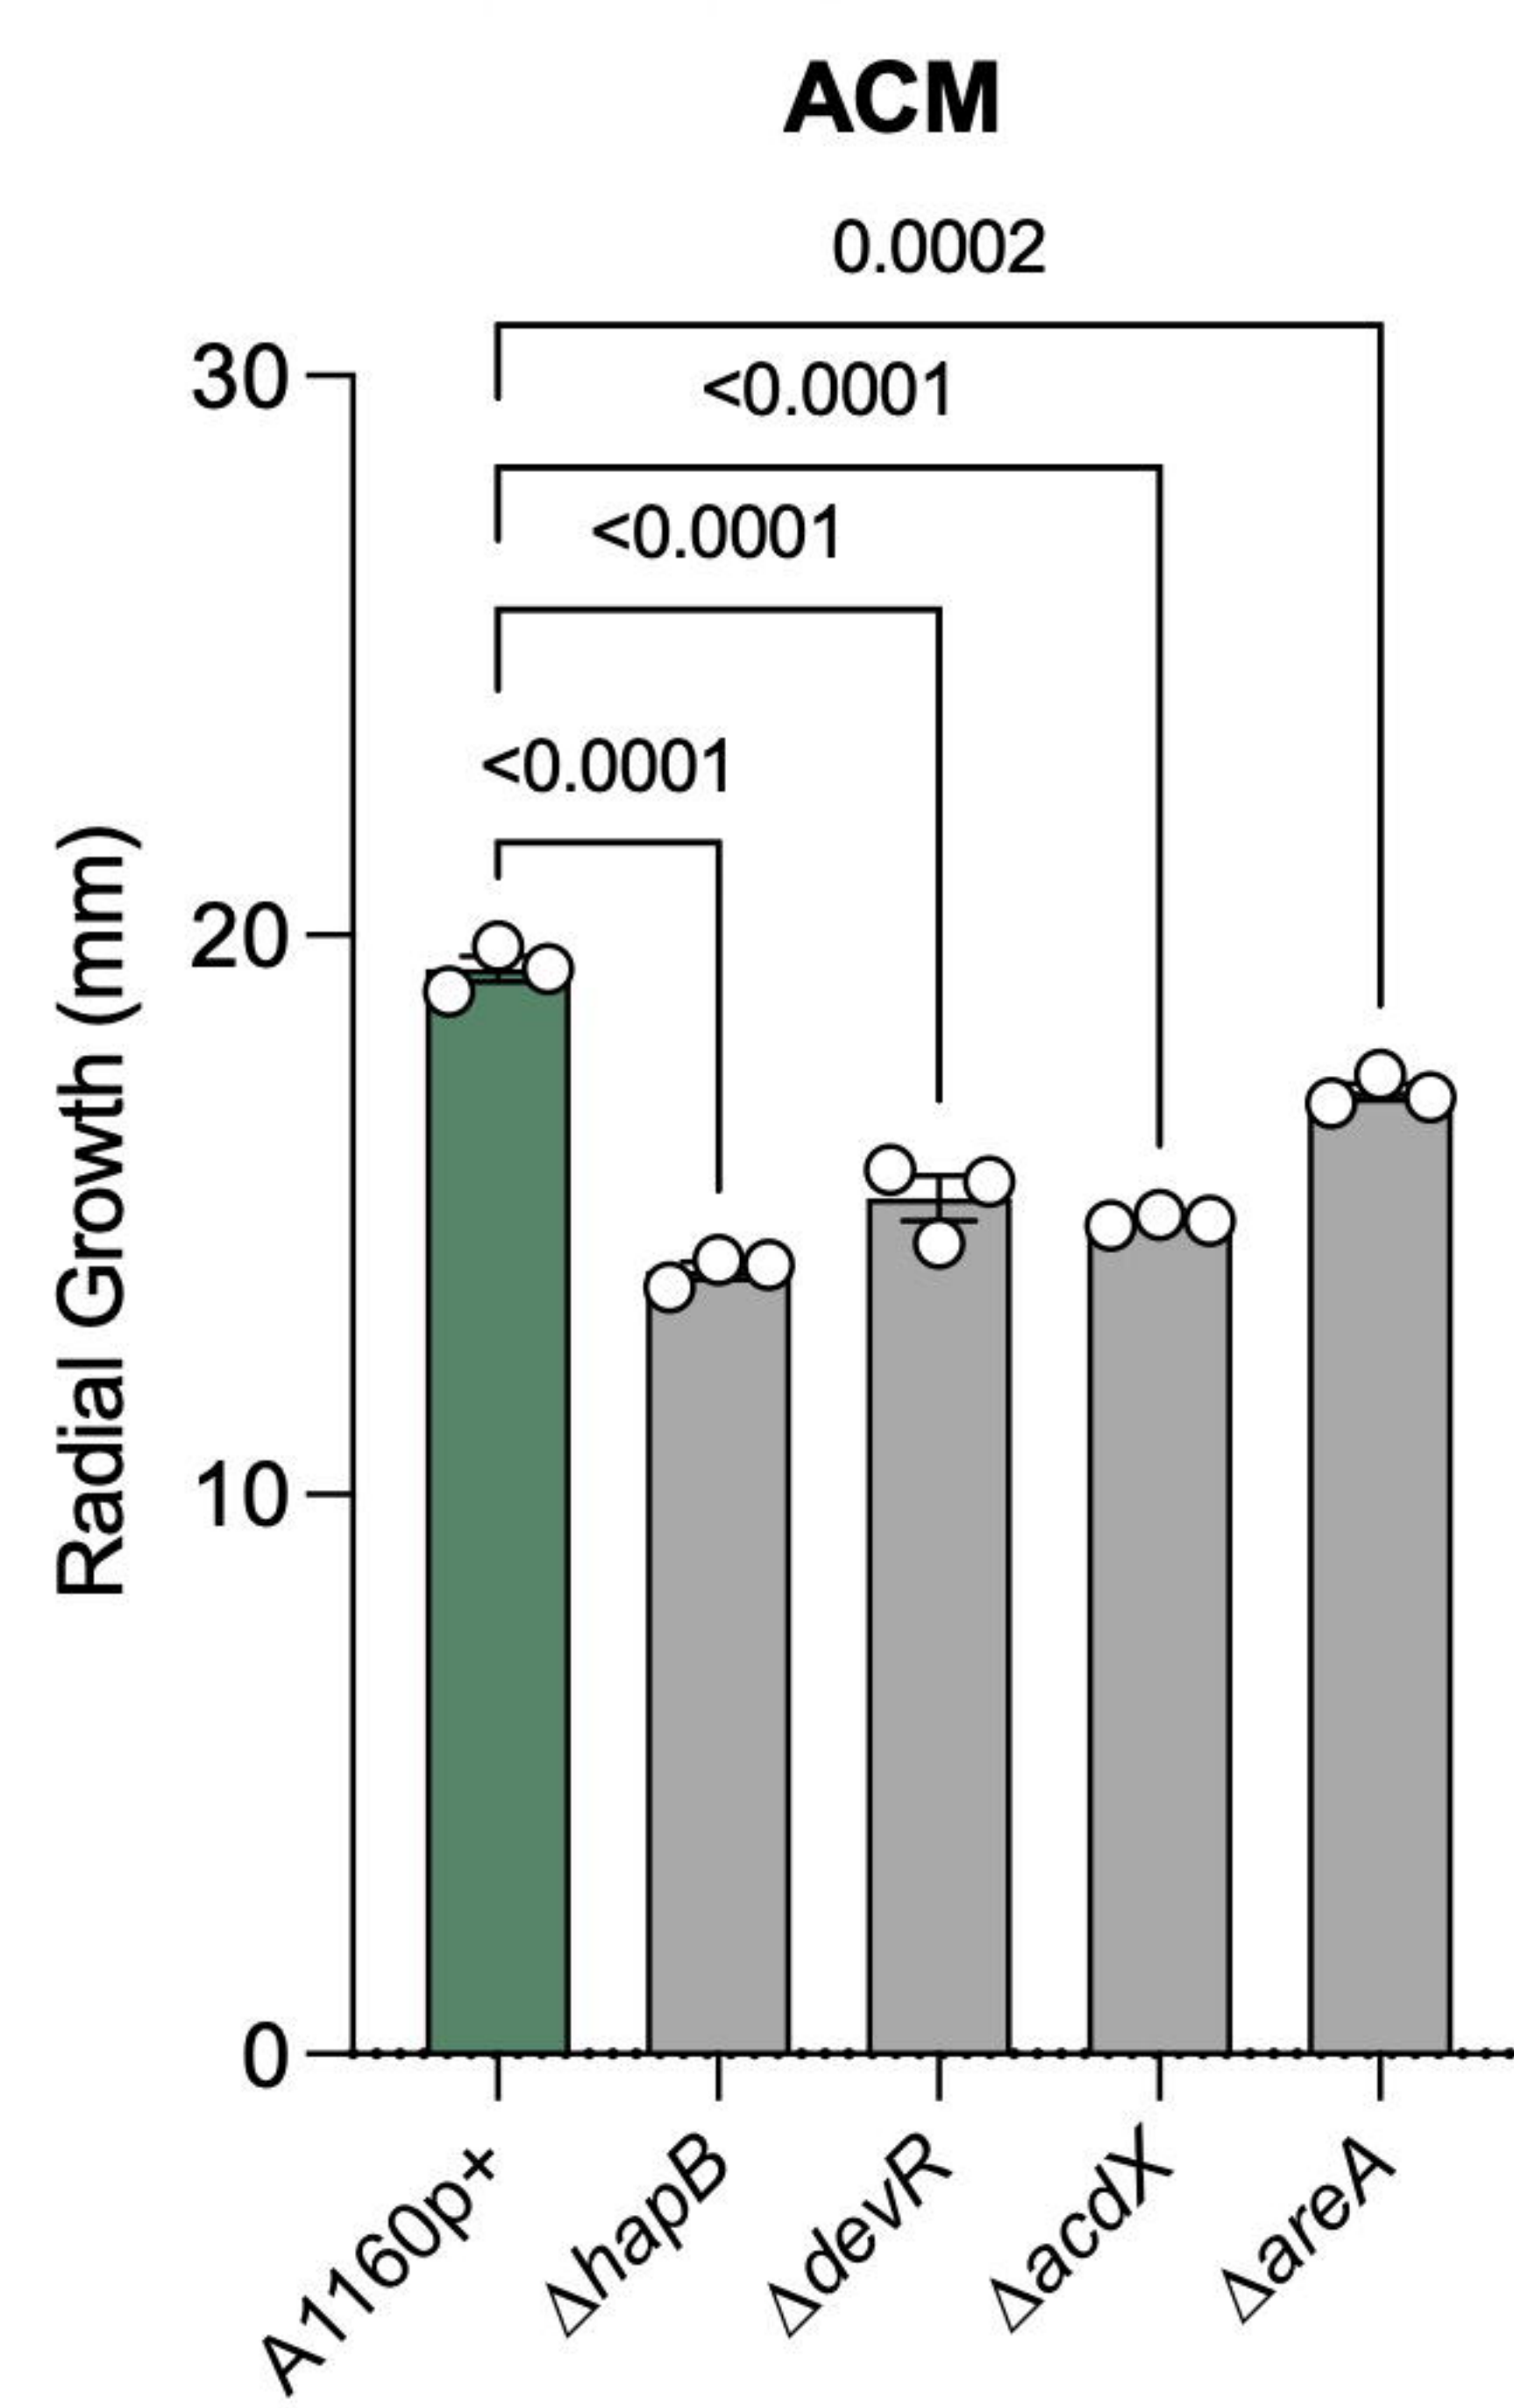**(c)**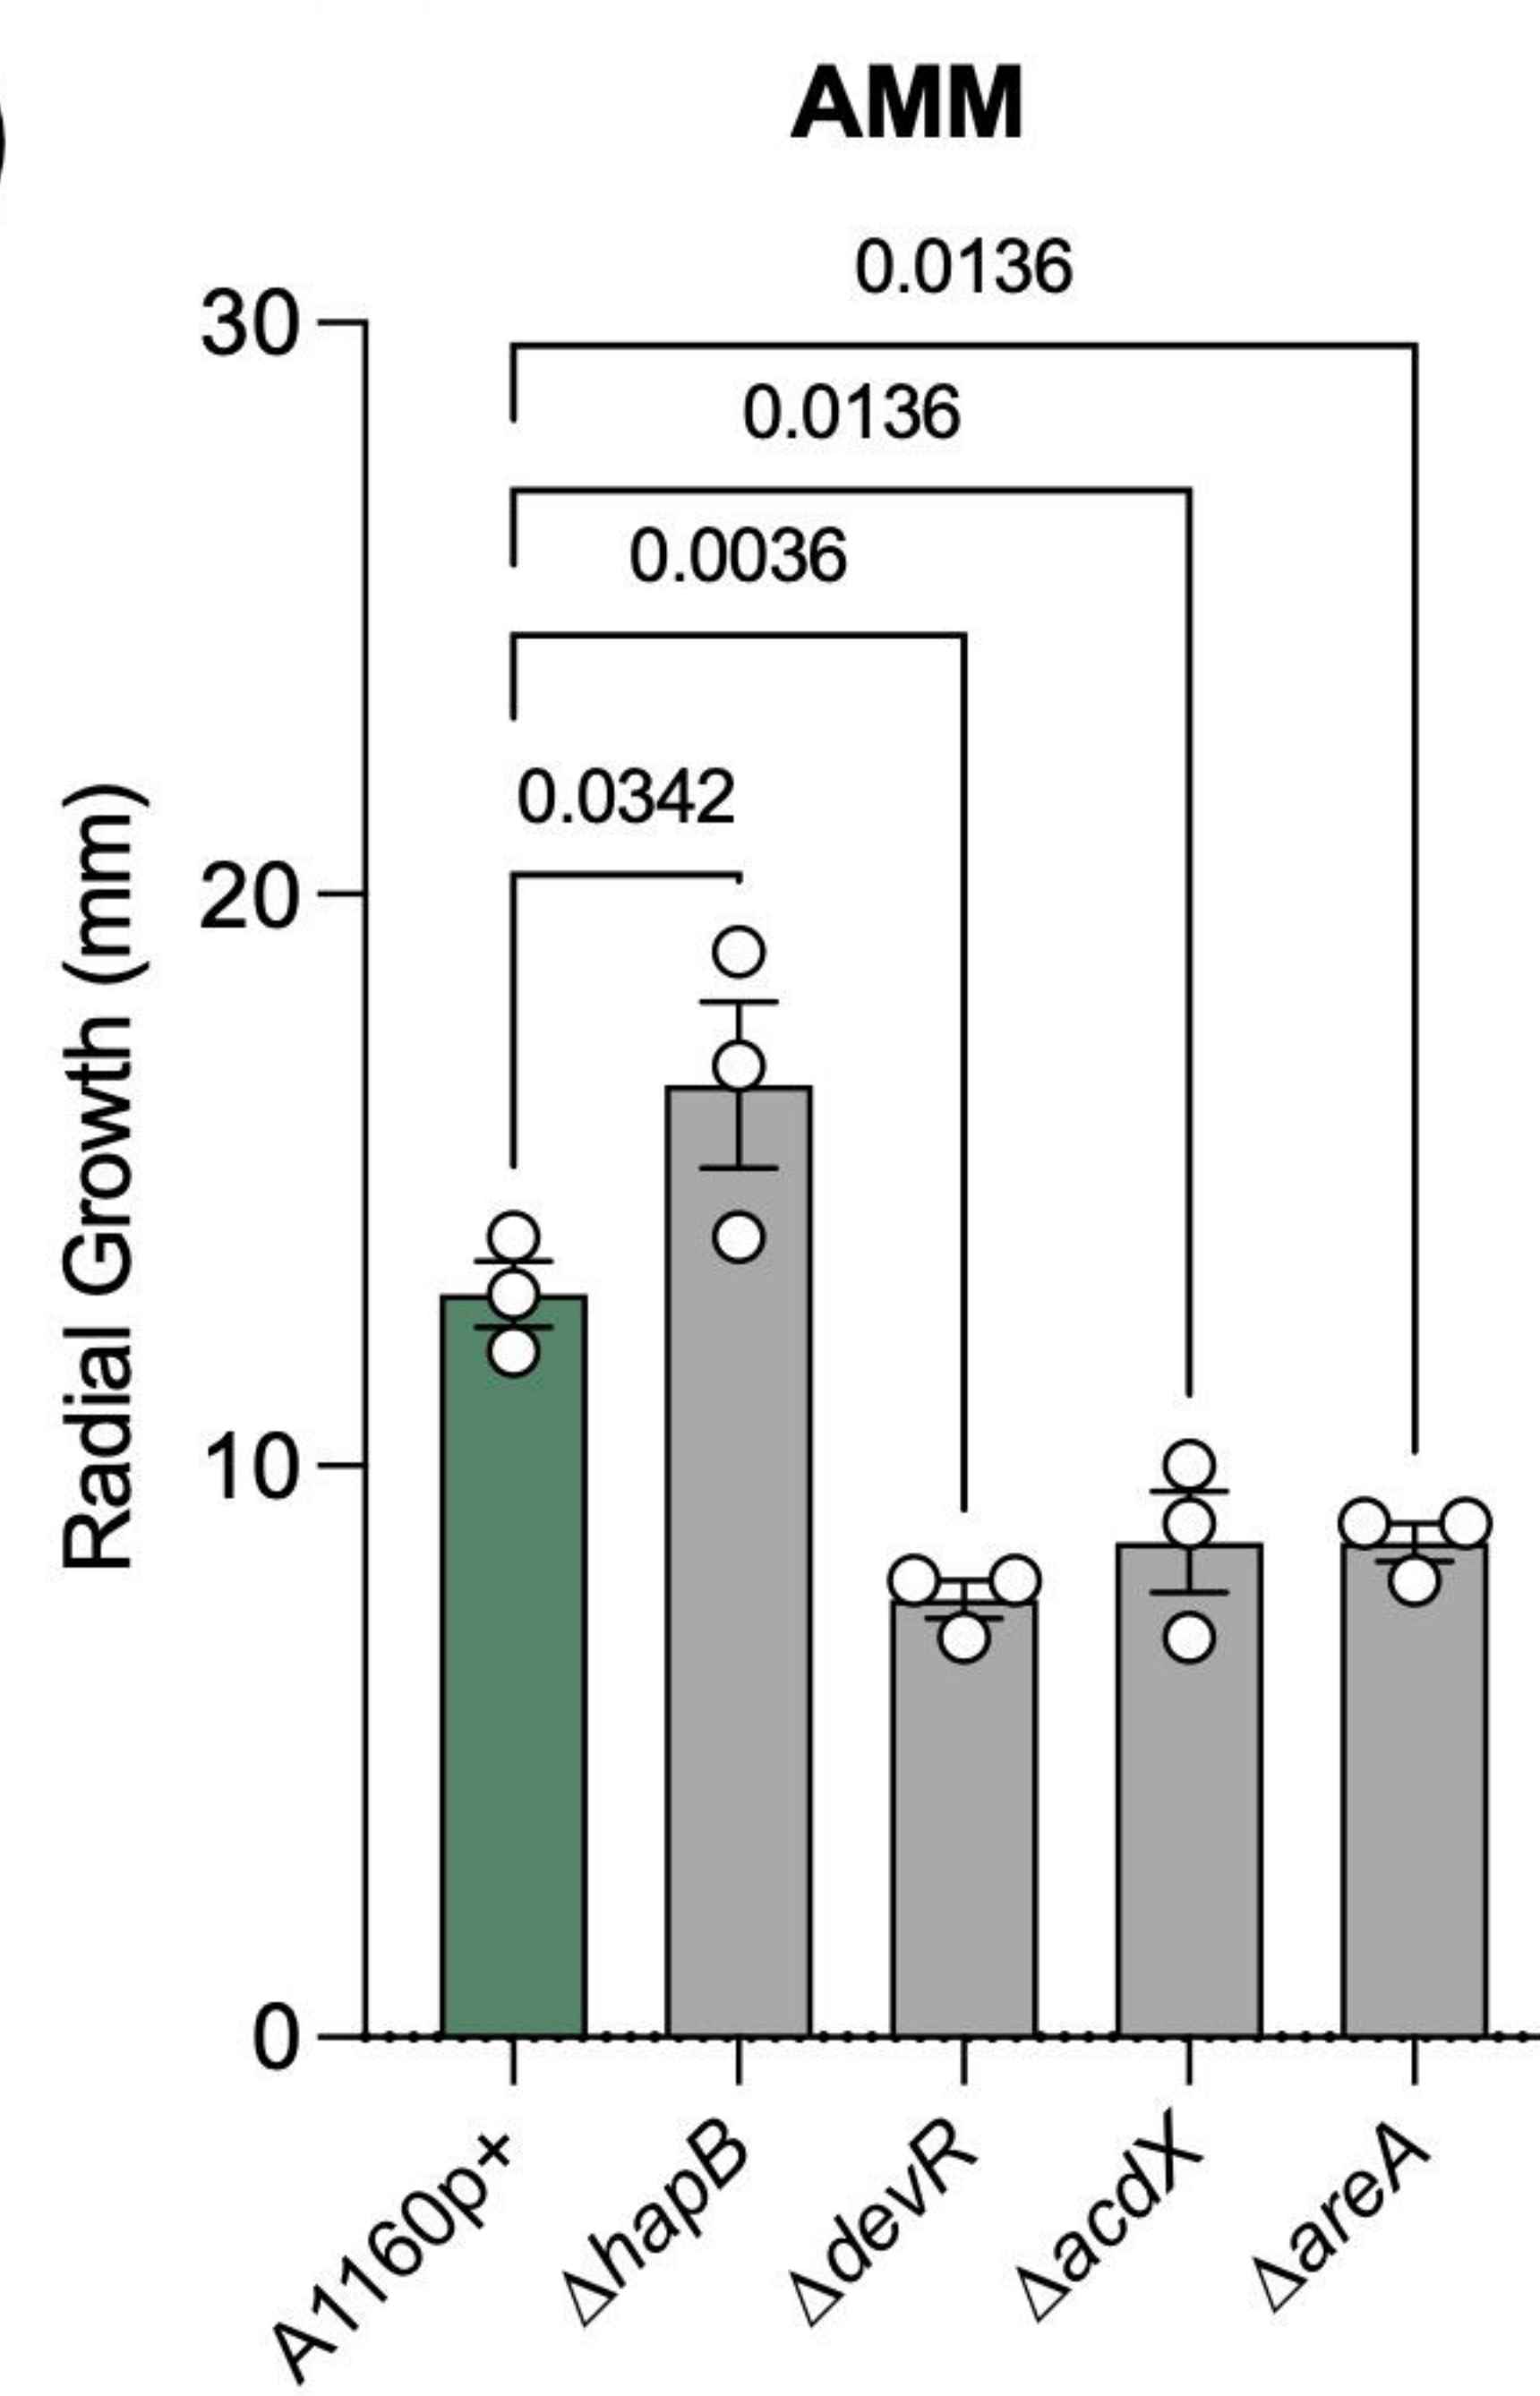**(d)**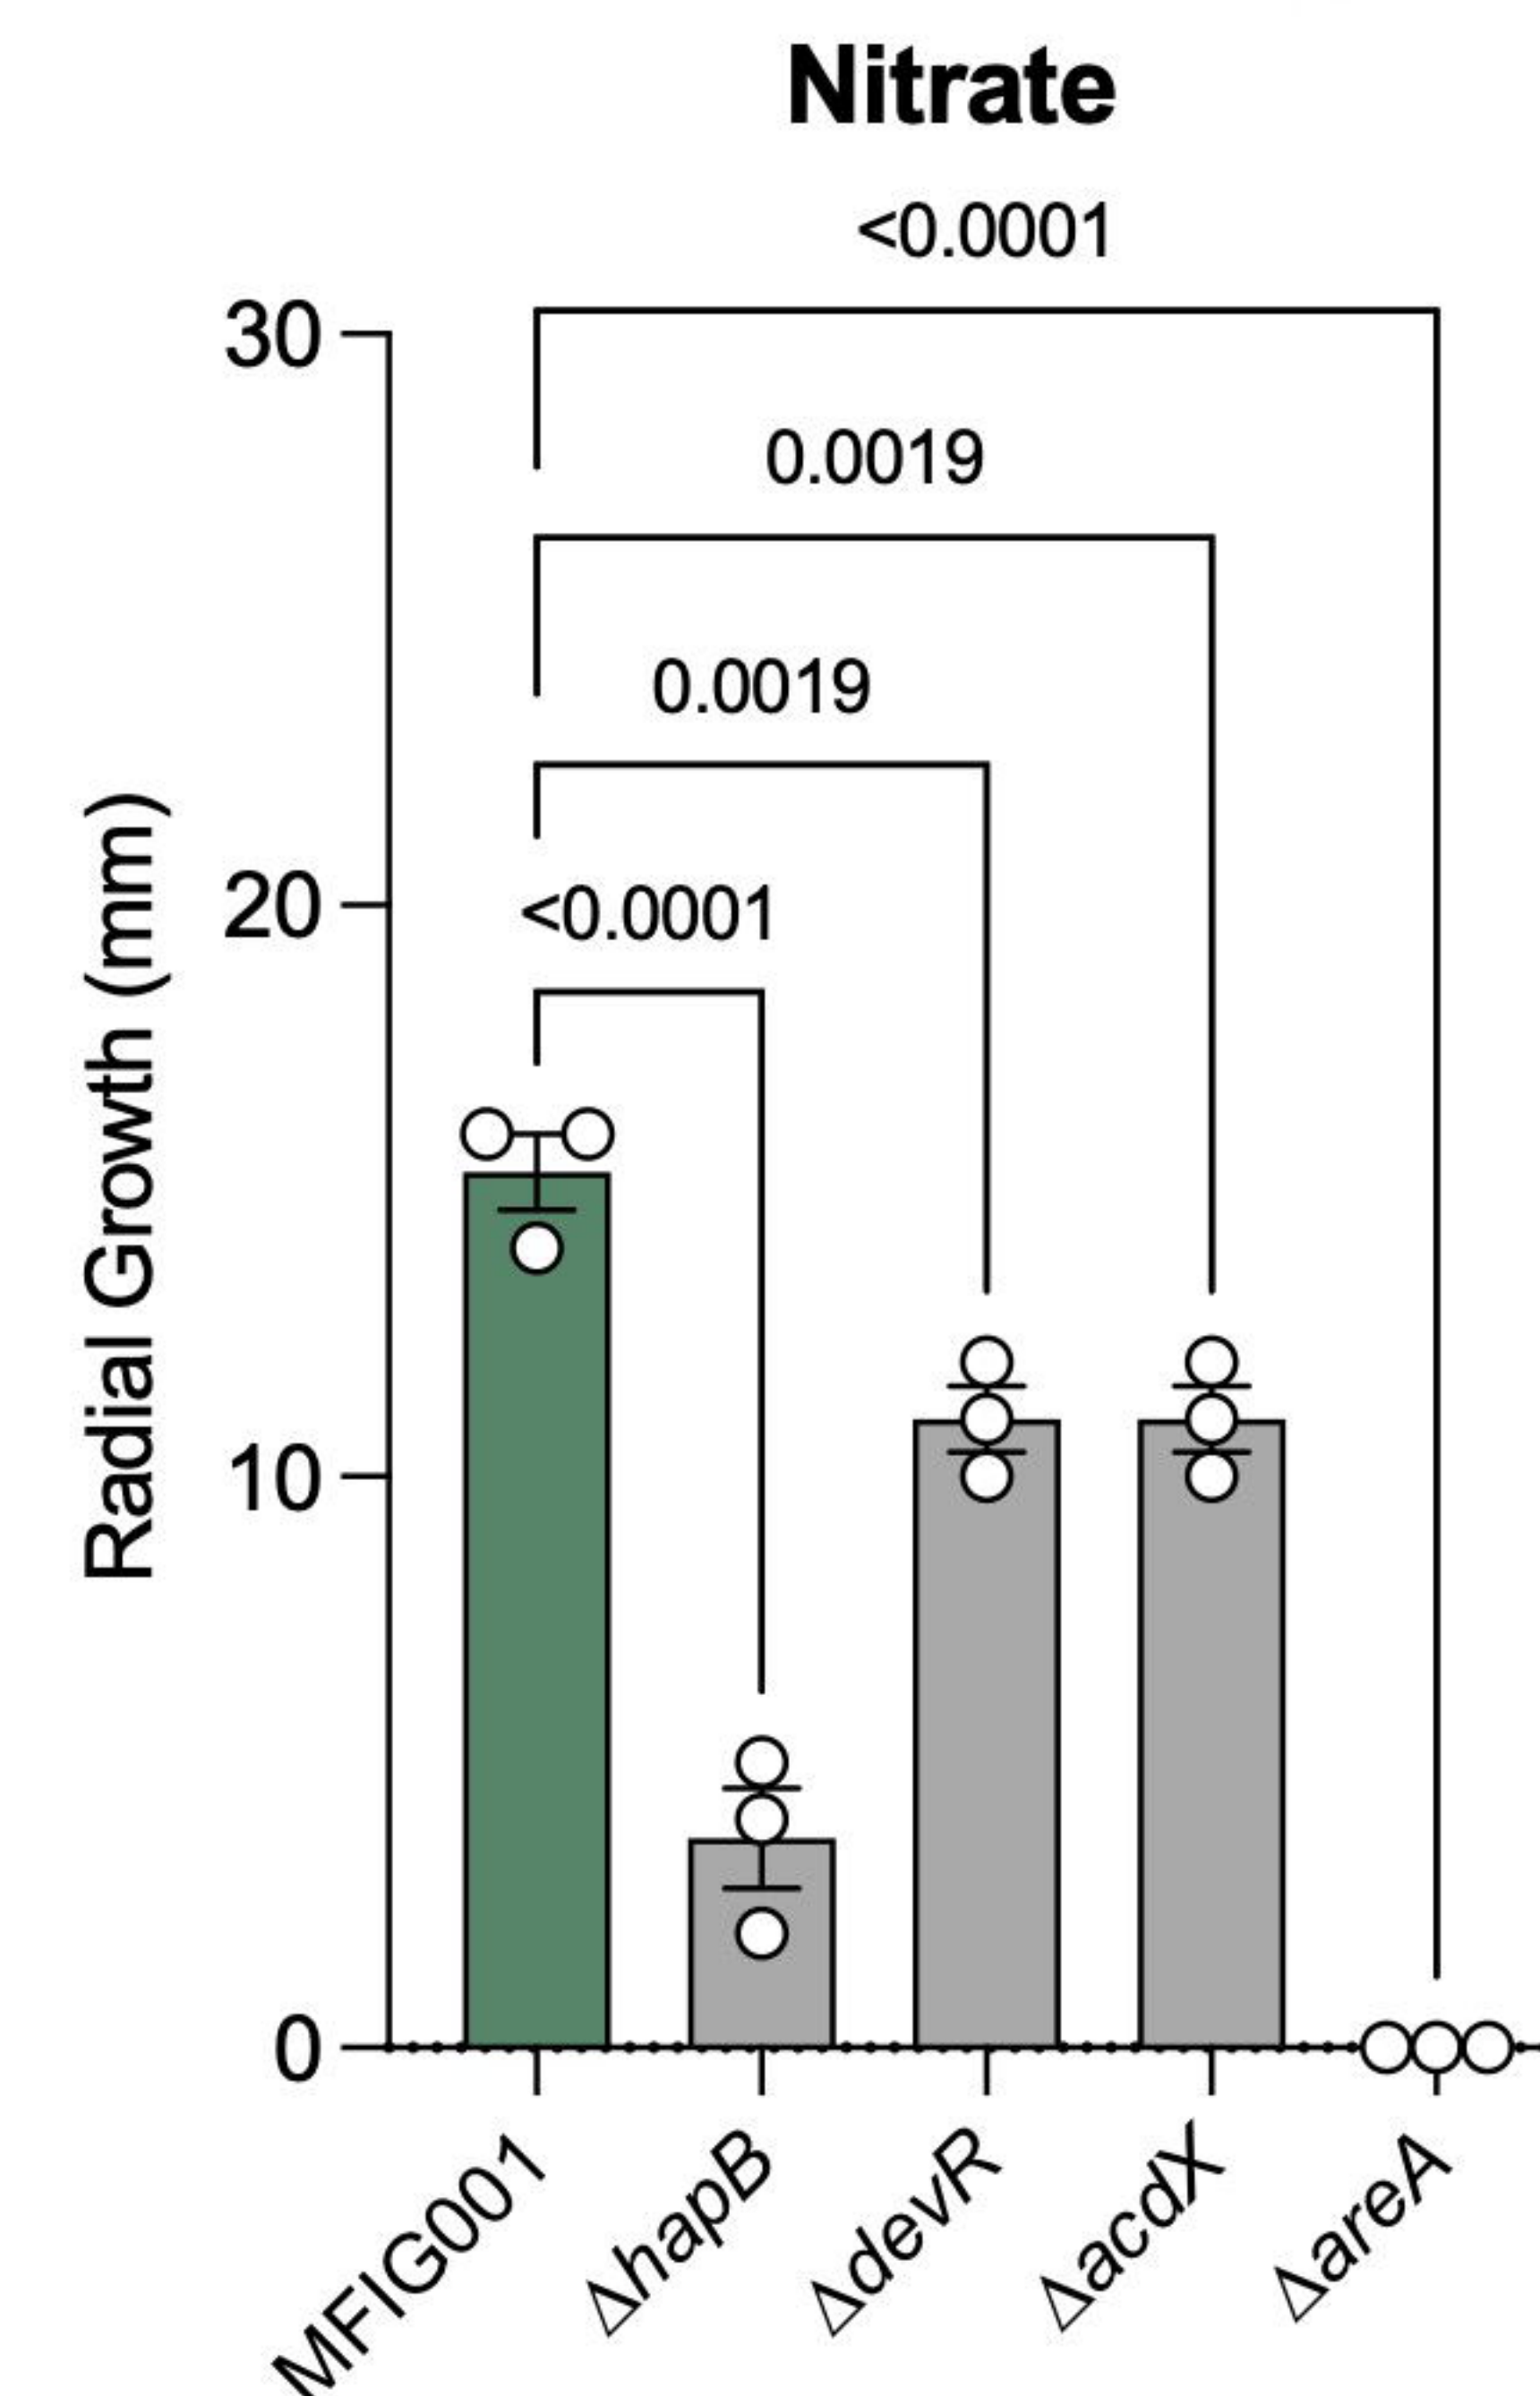**(e)**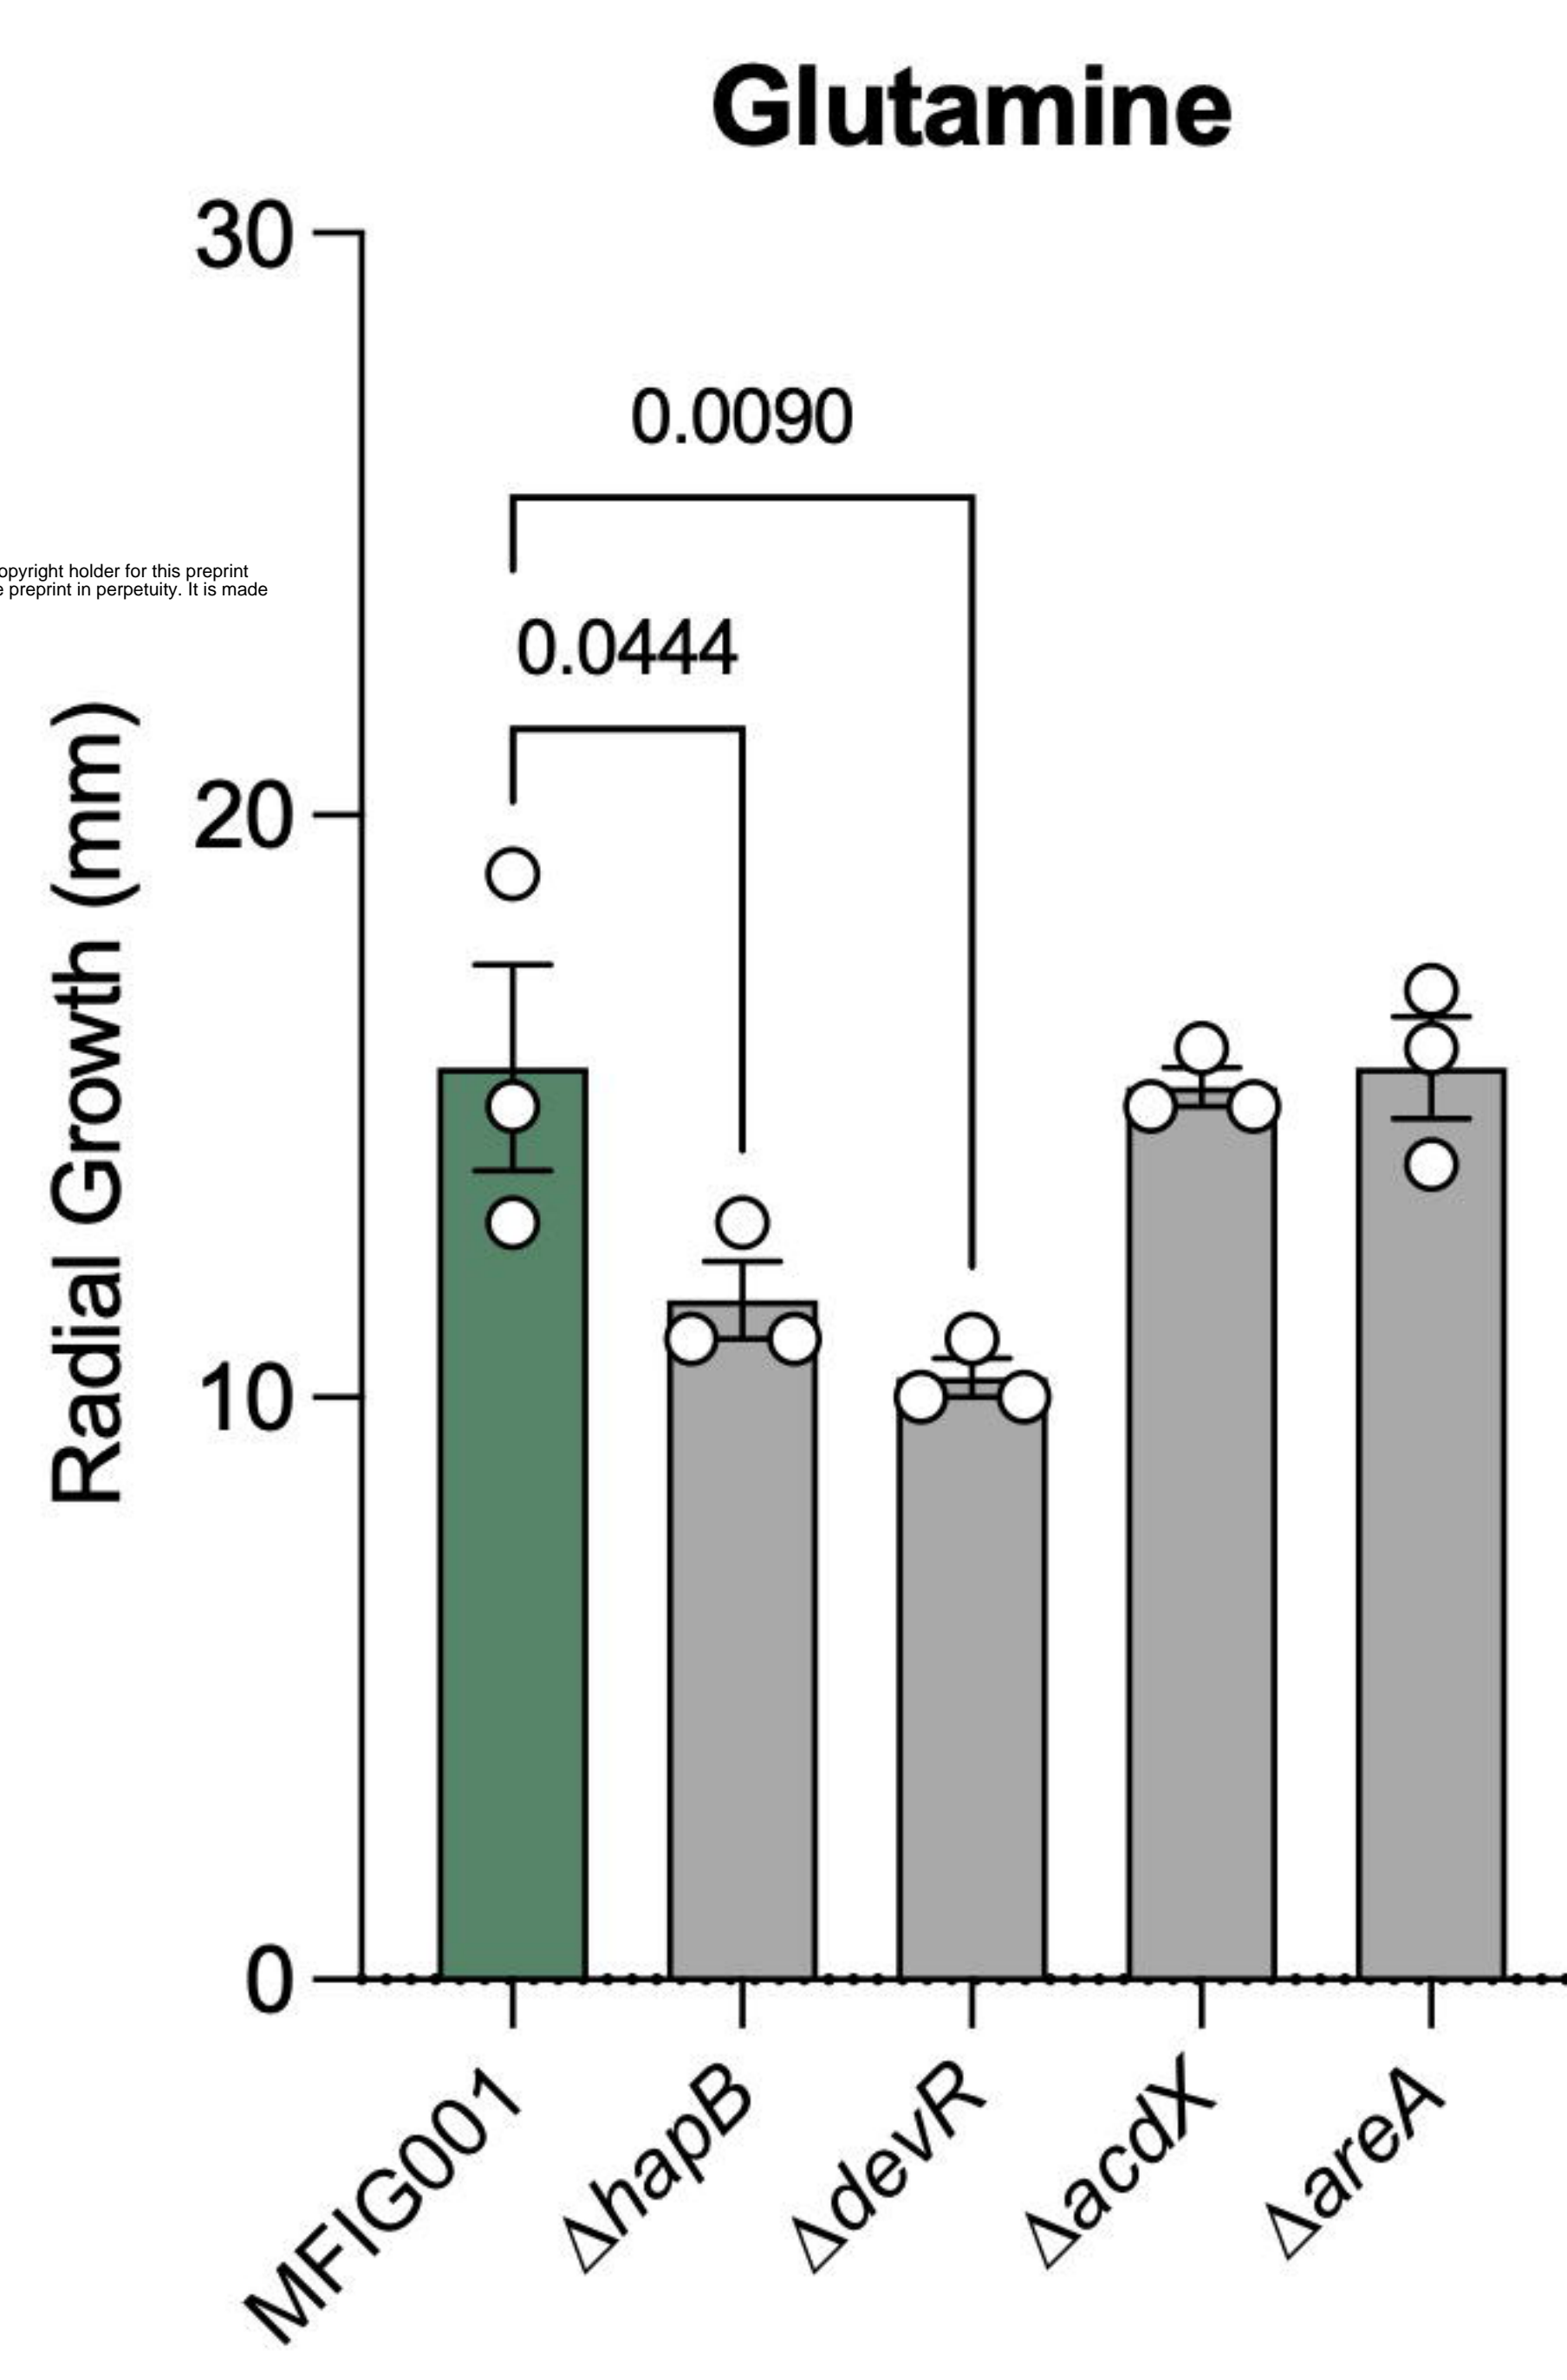**(f)**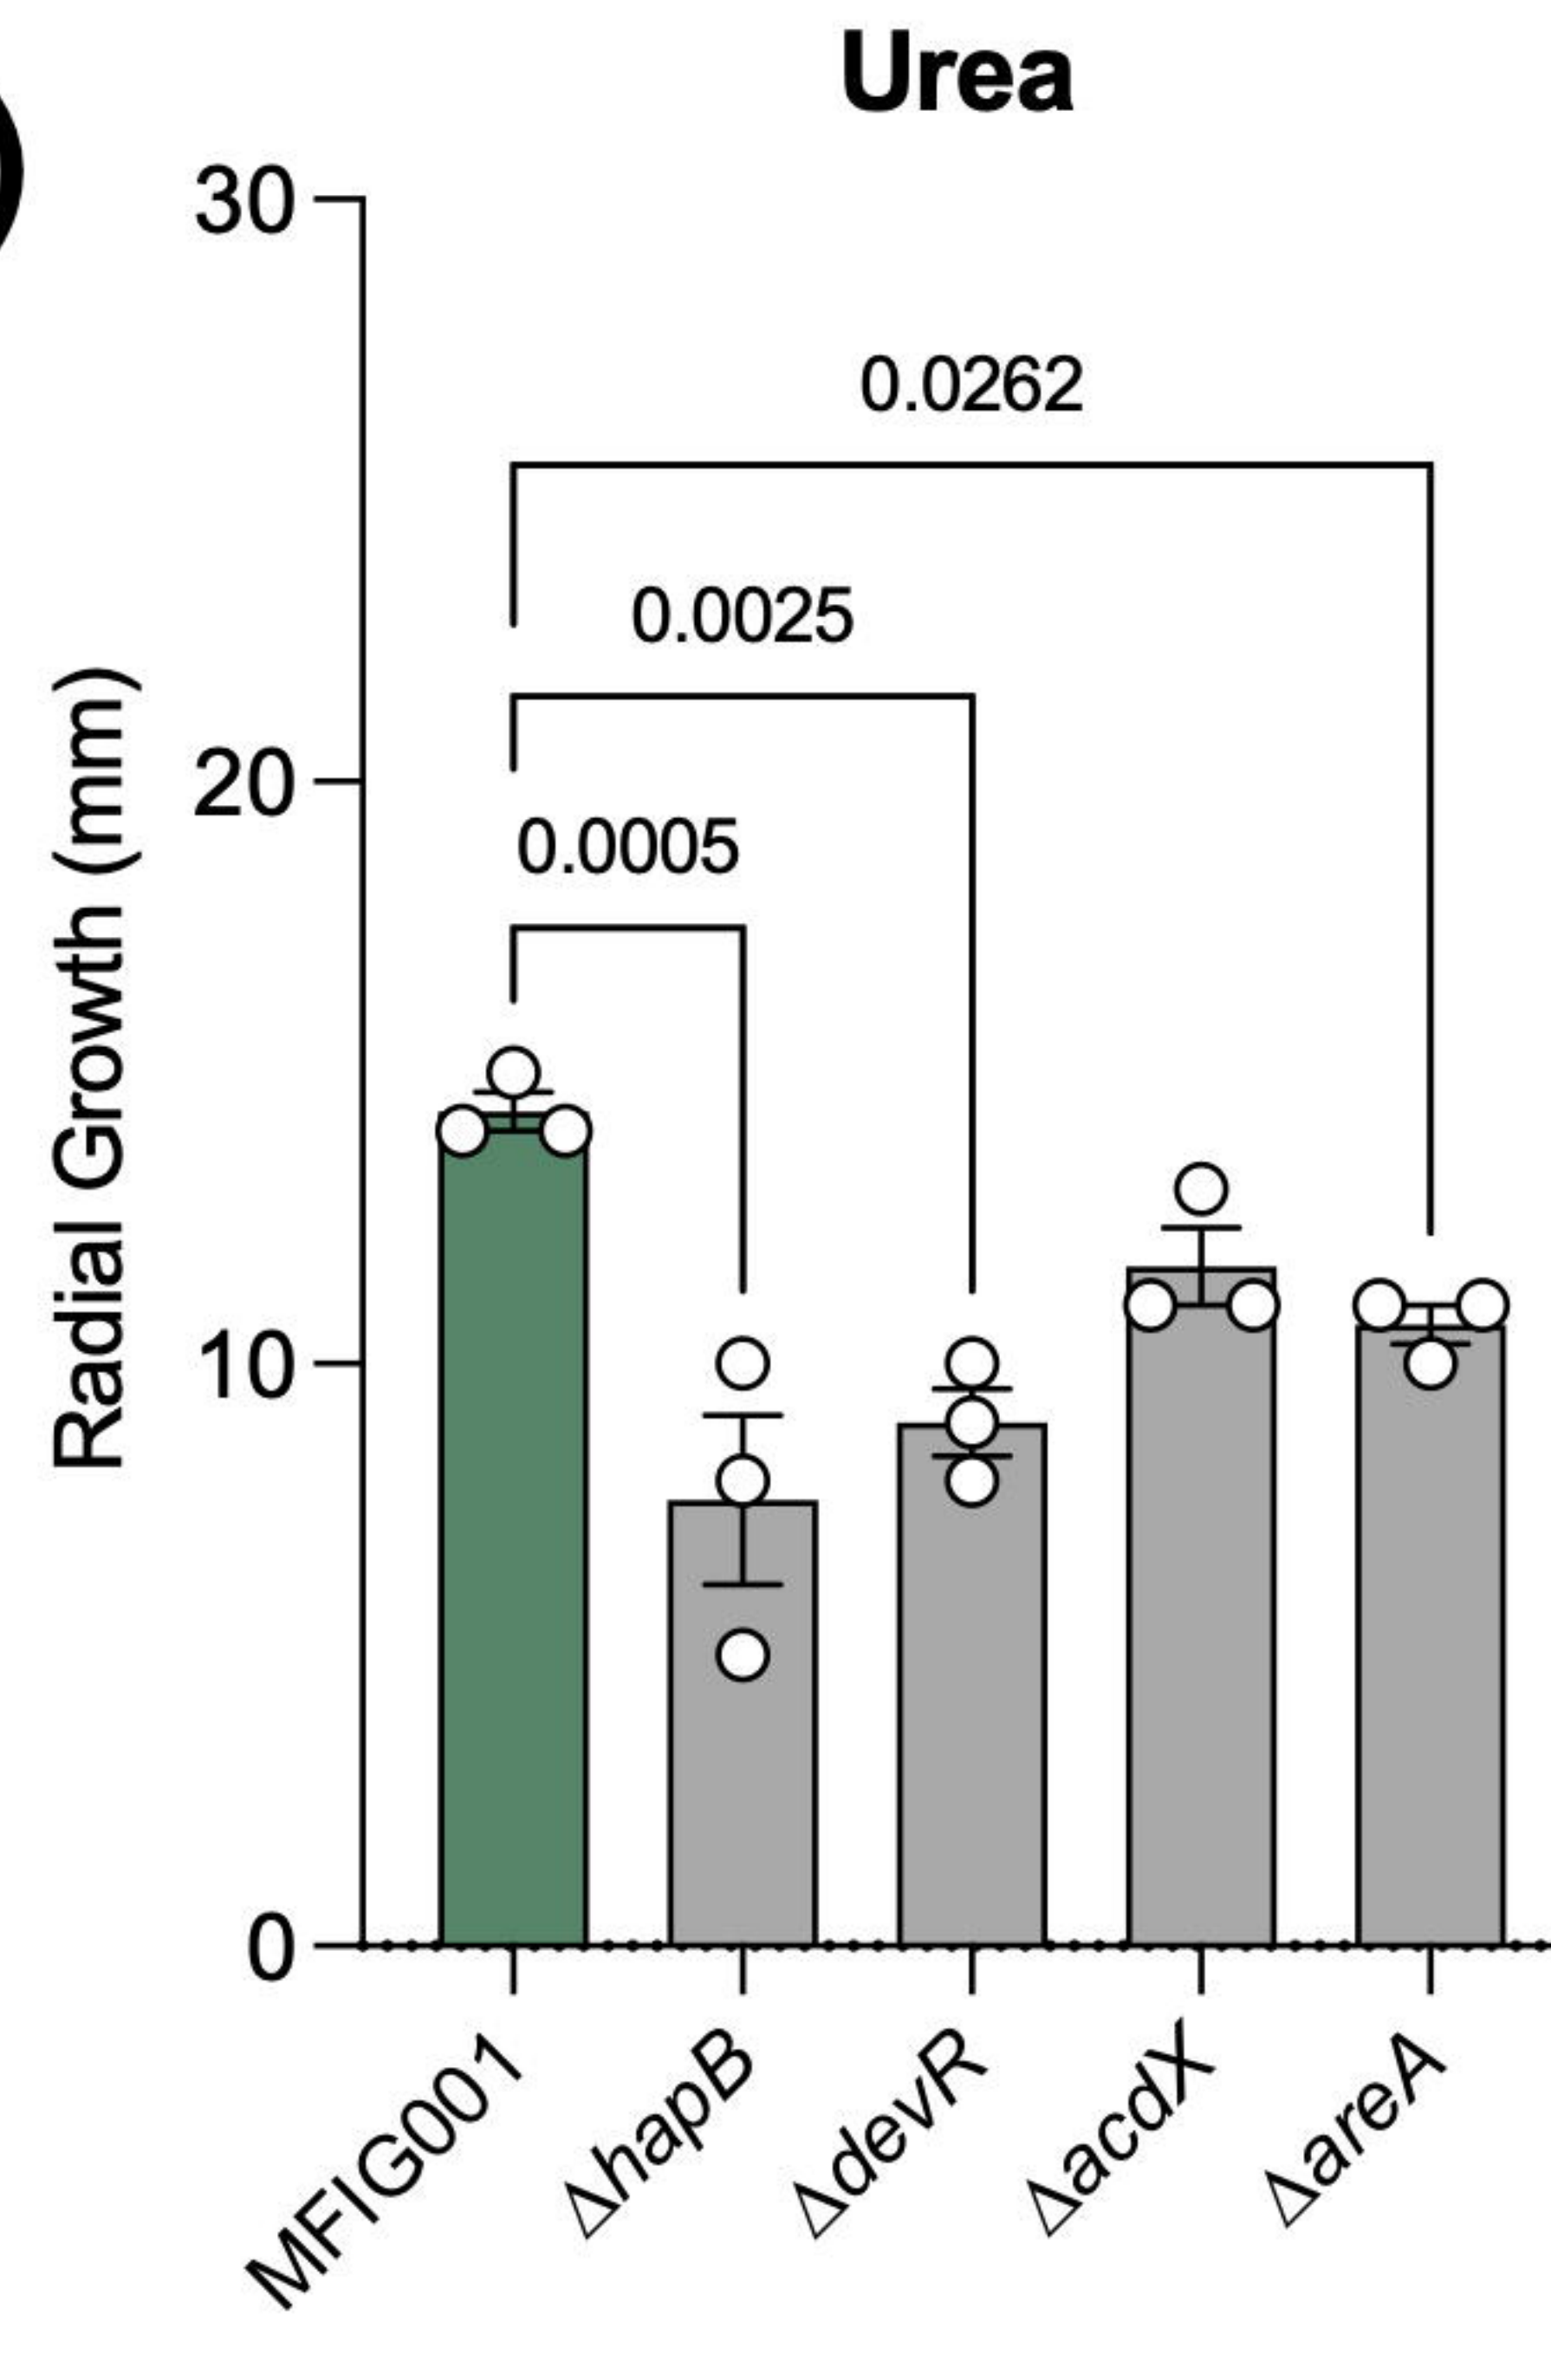**(g)**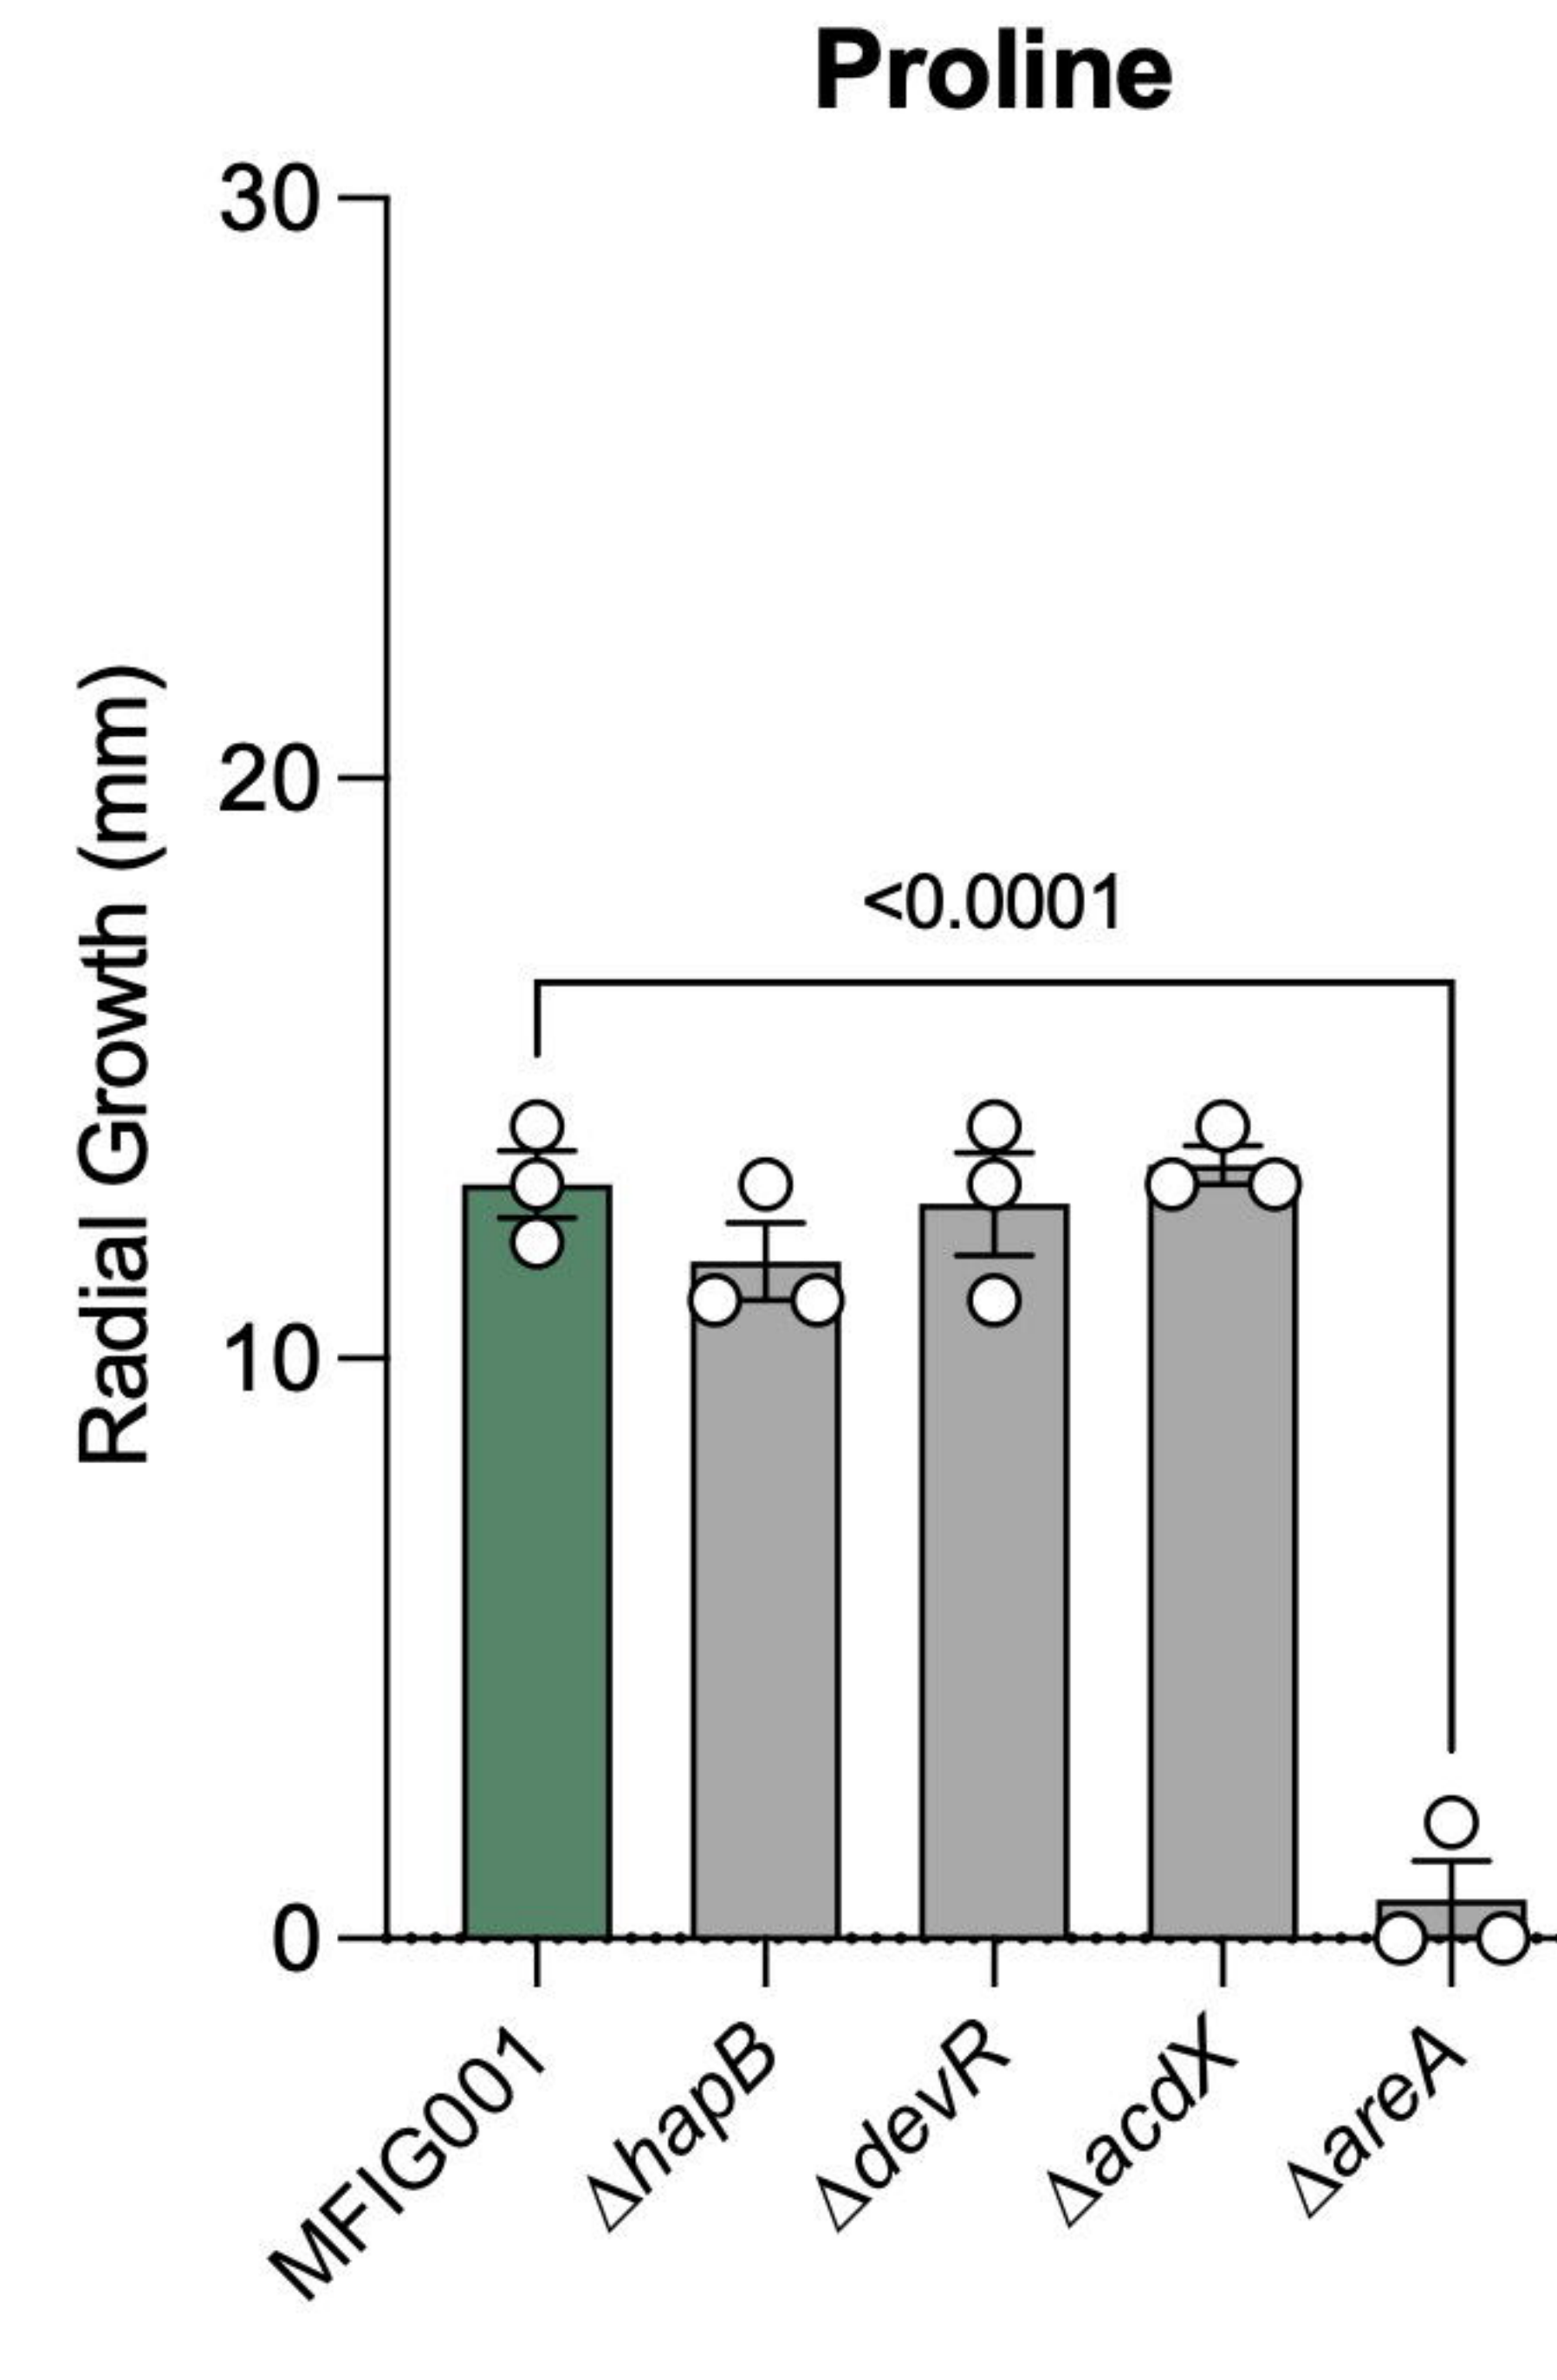



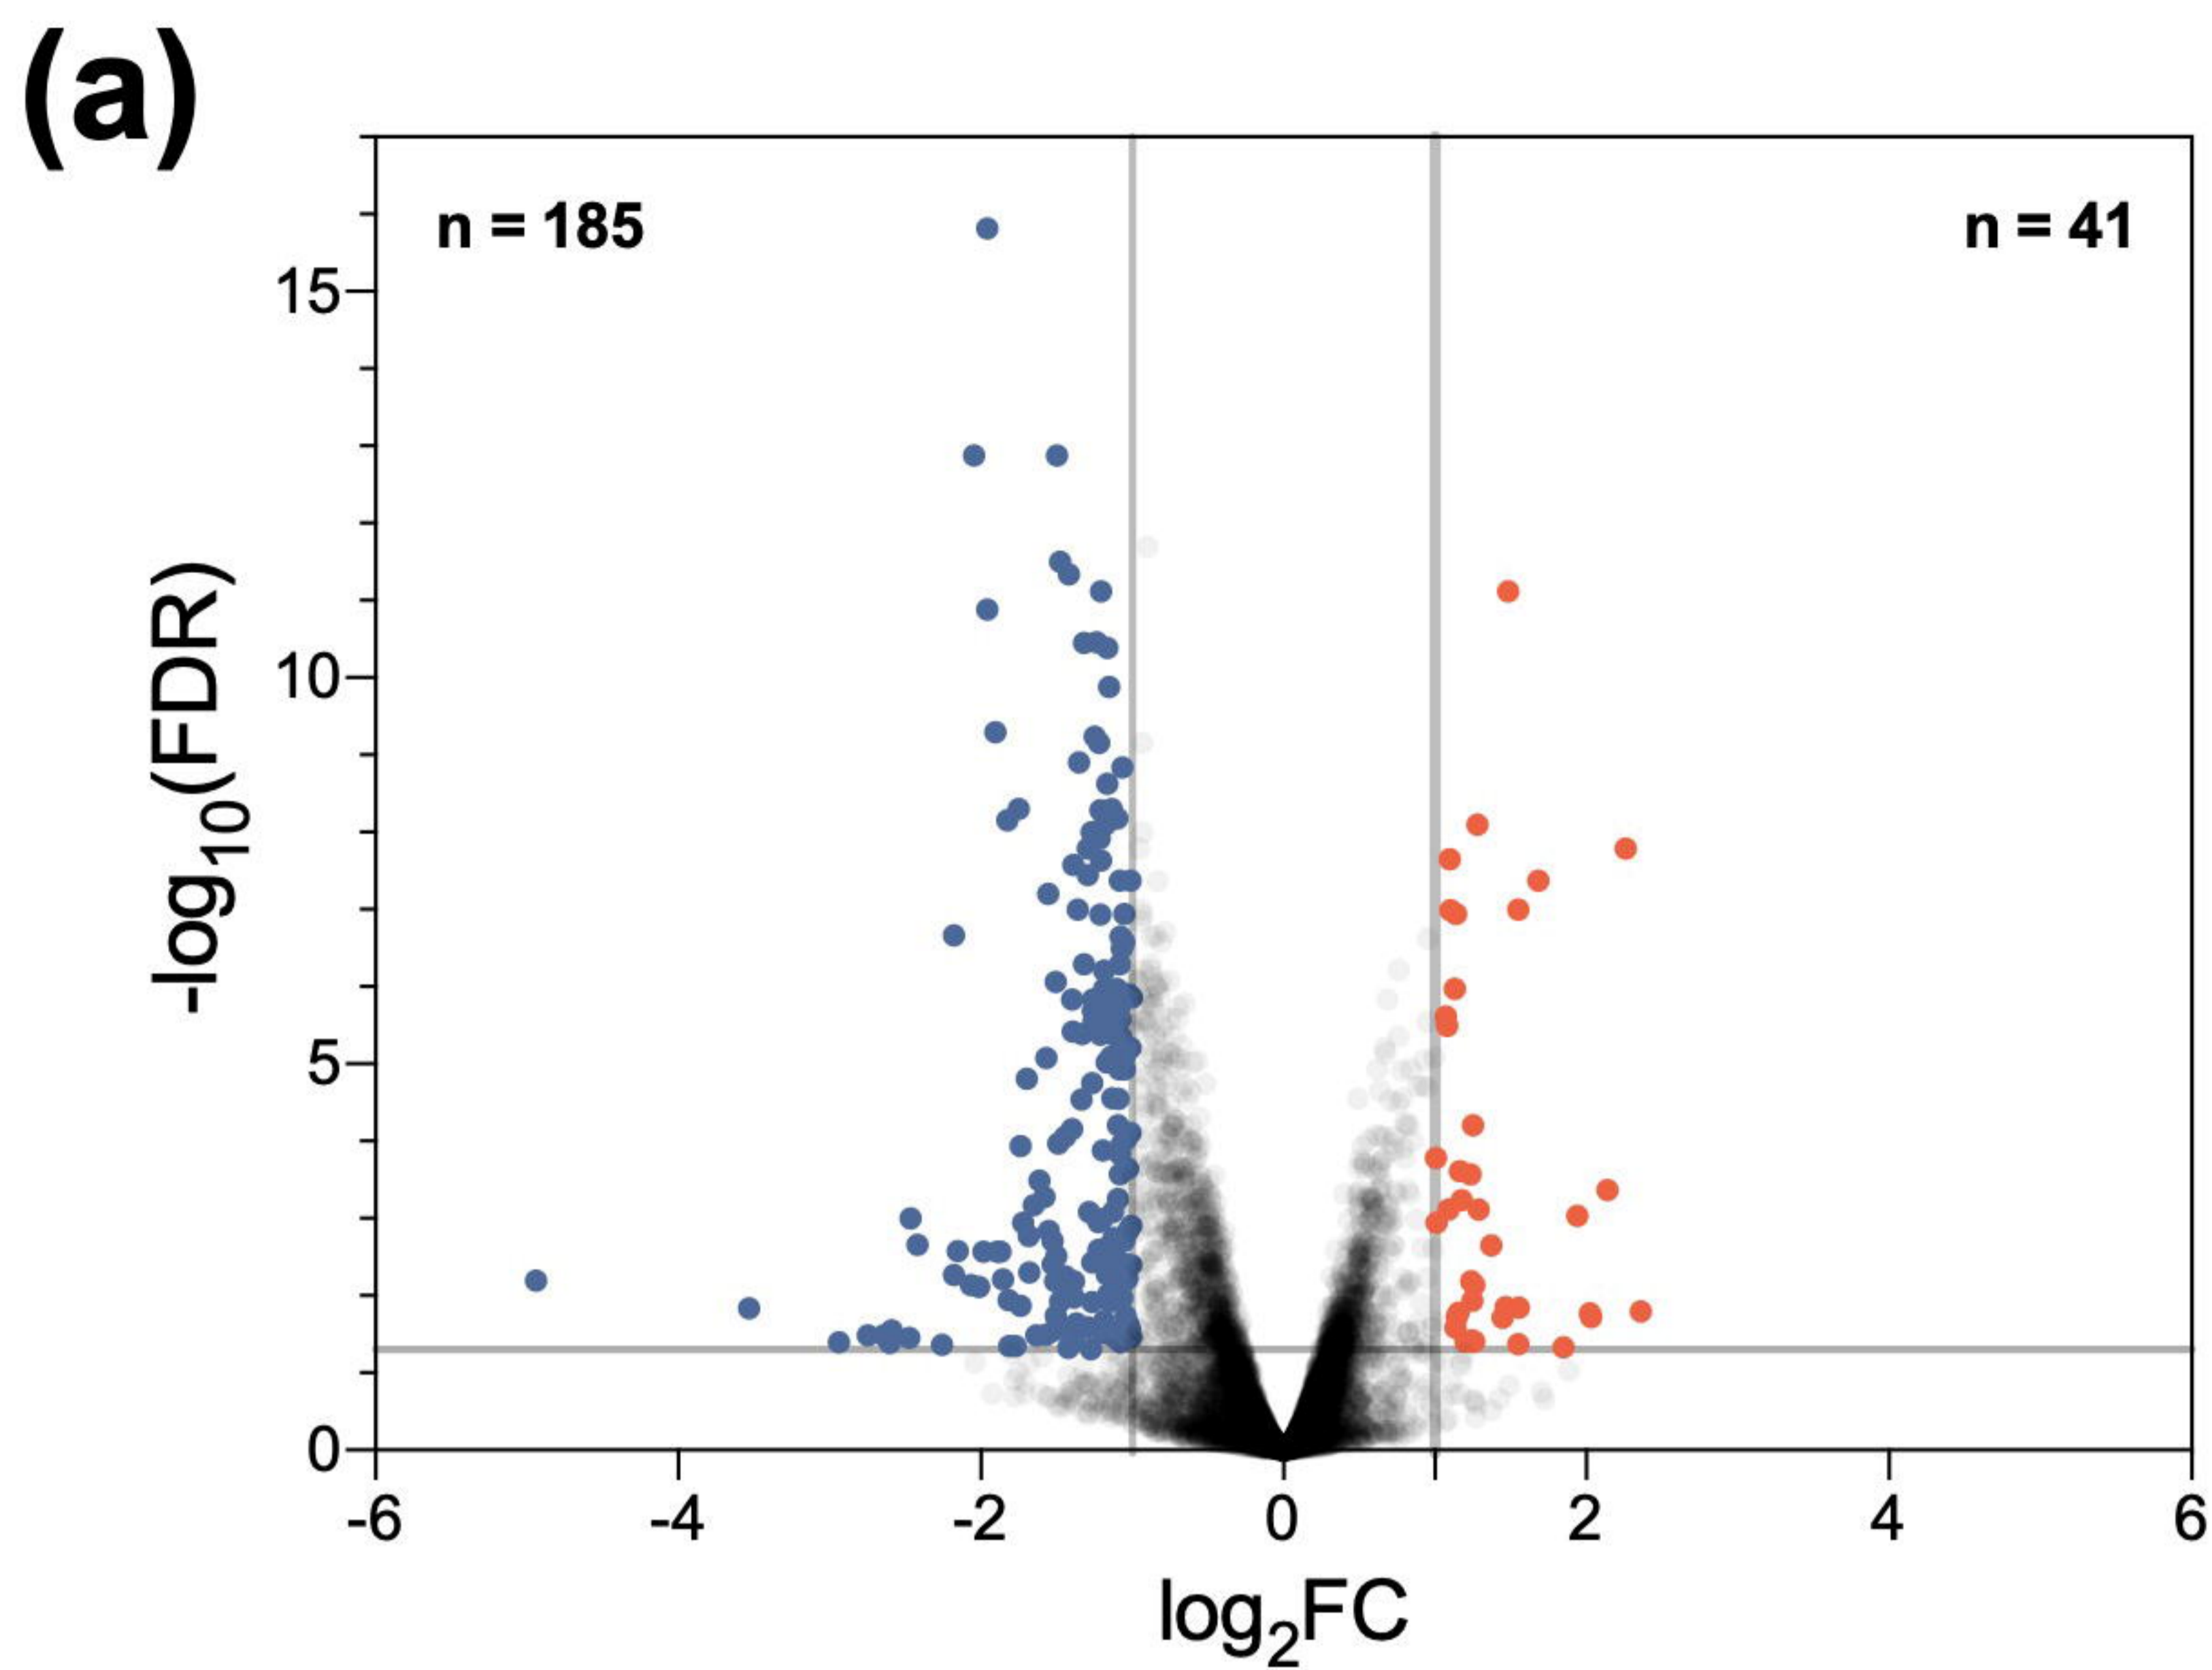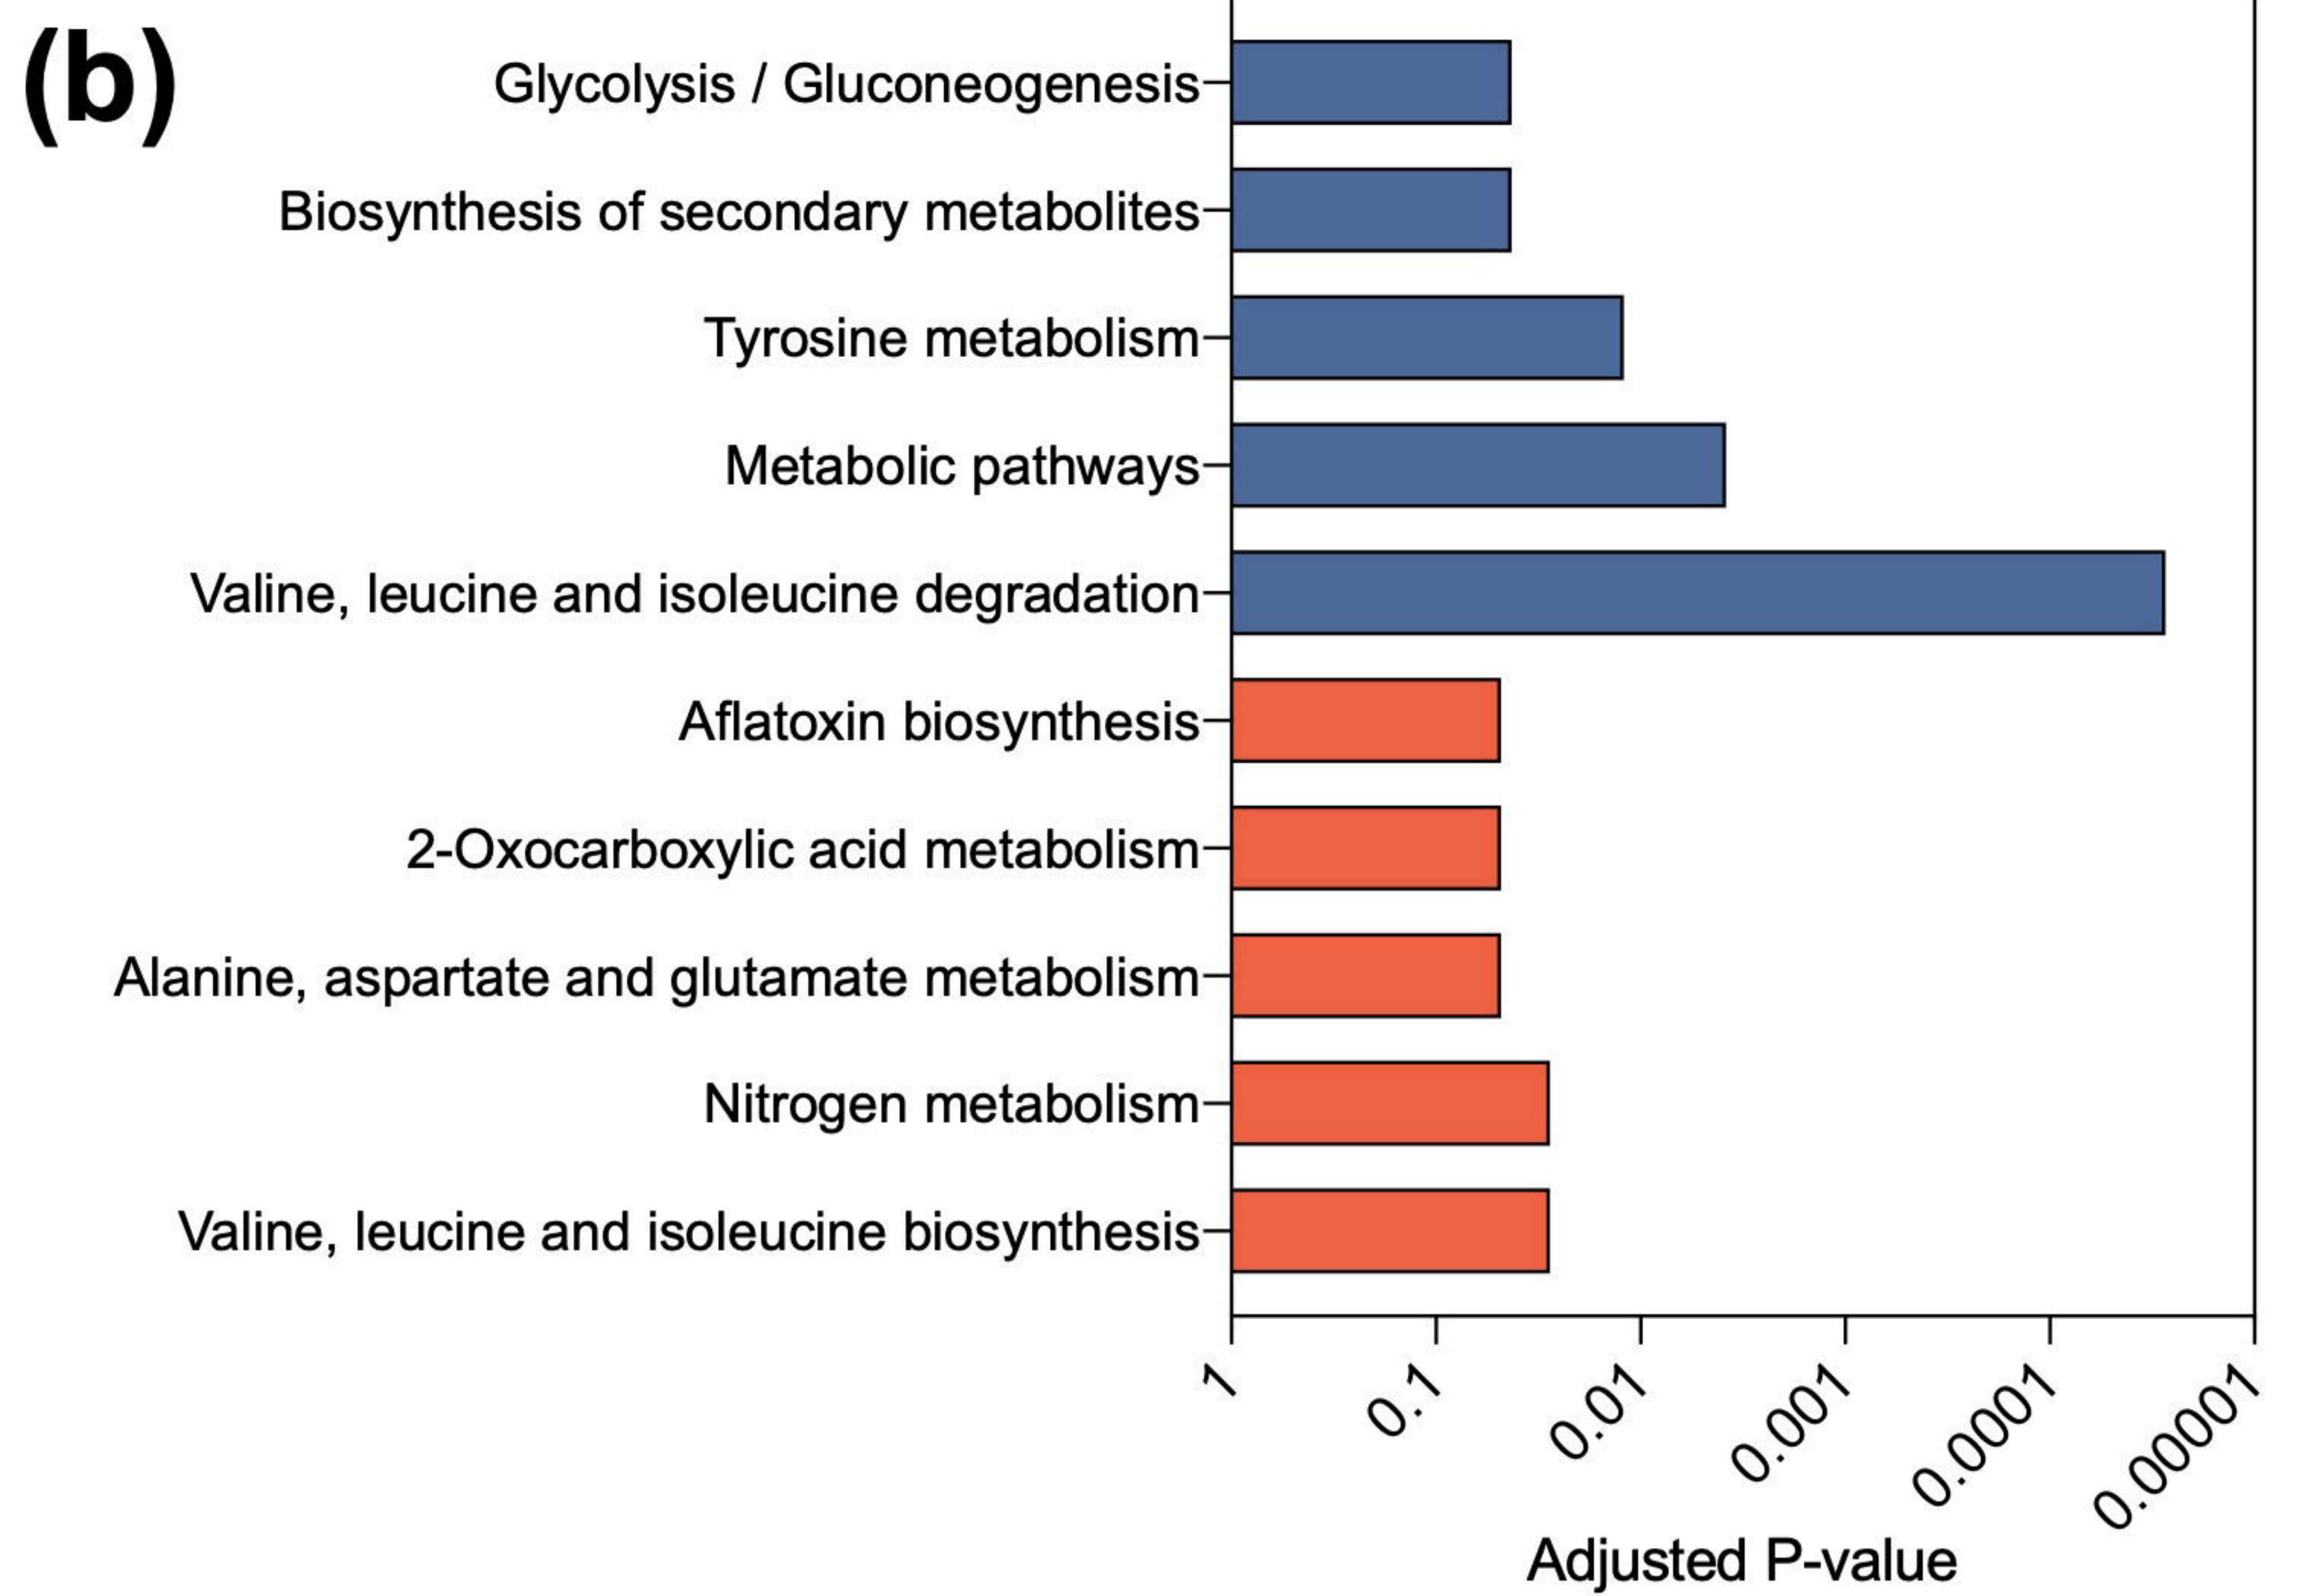

**(c)**

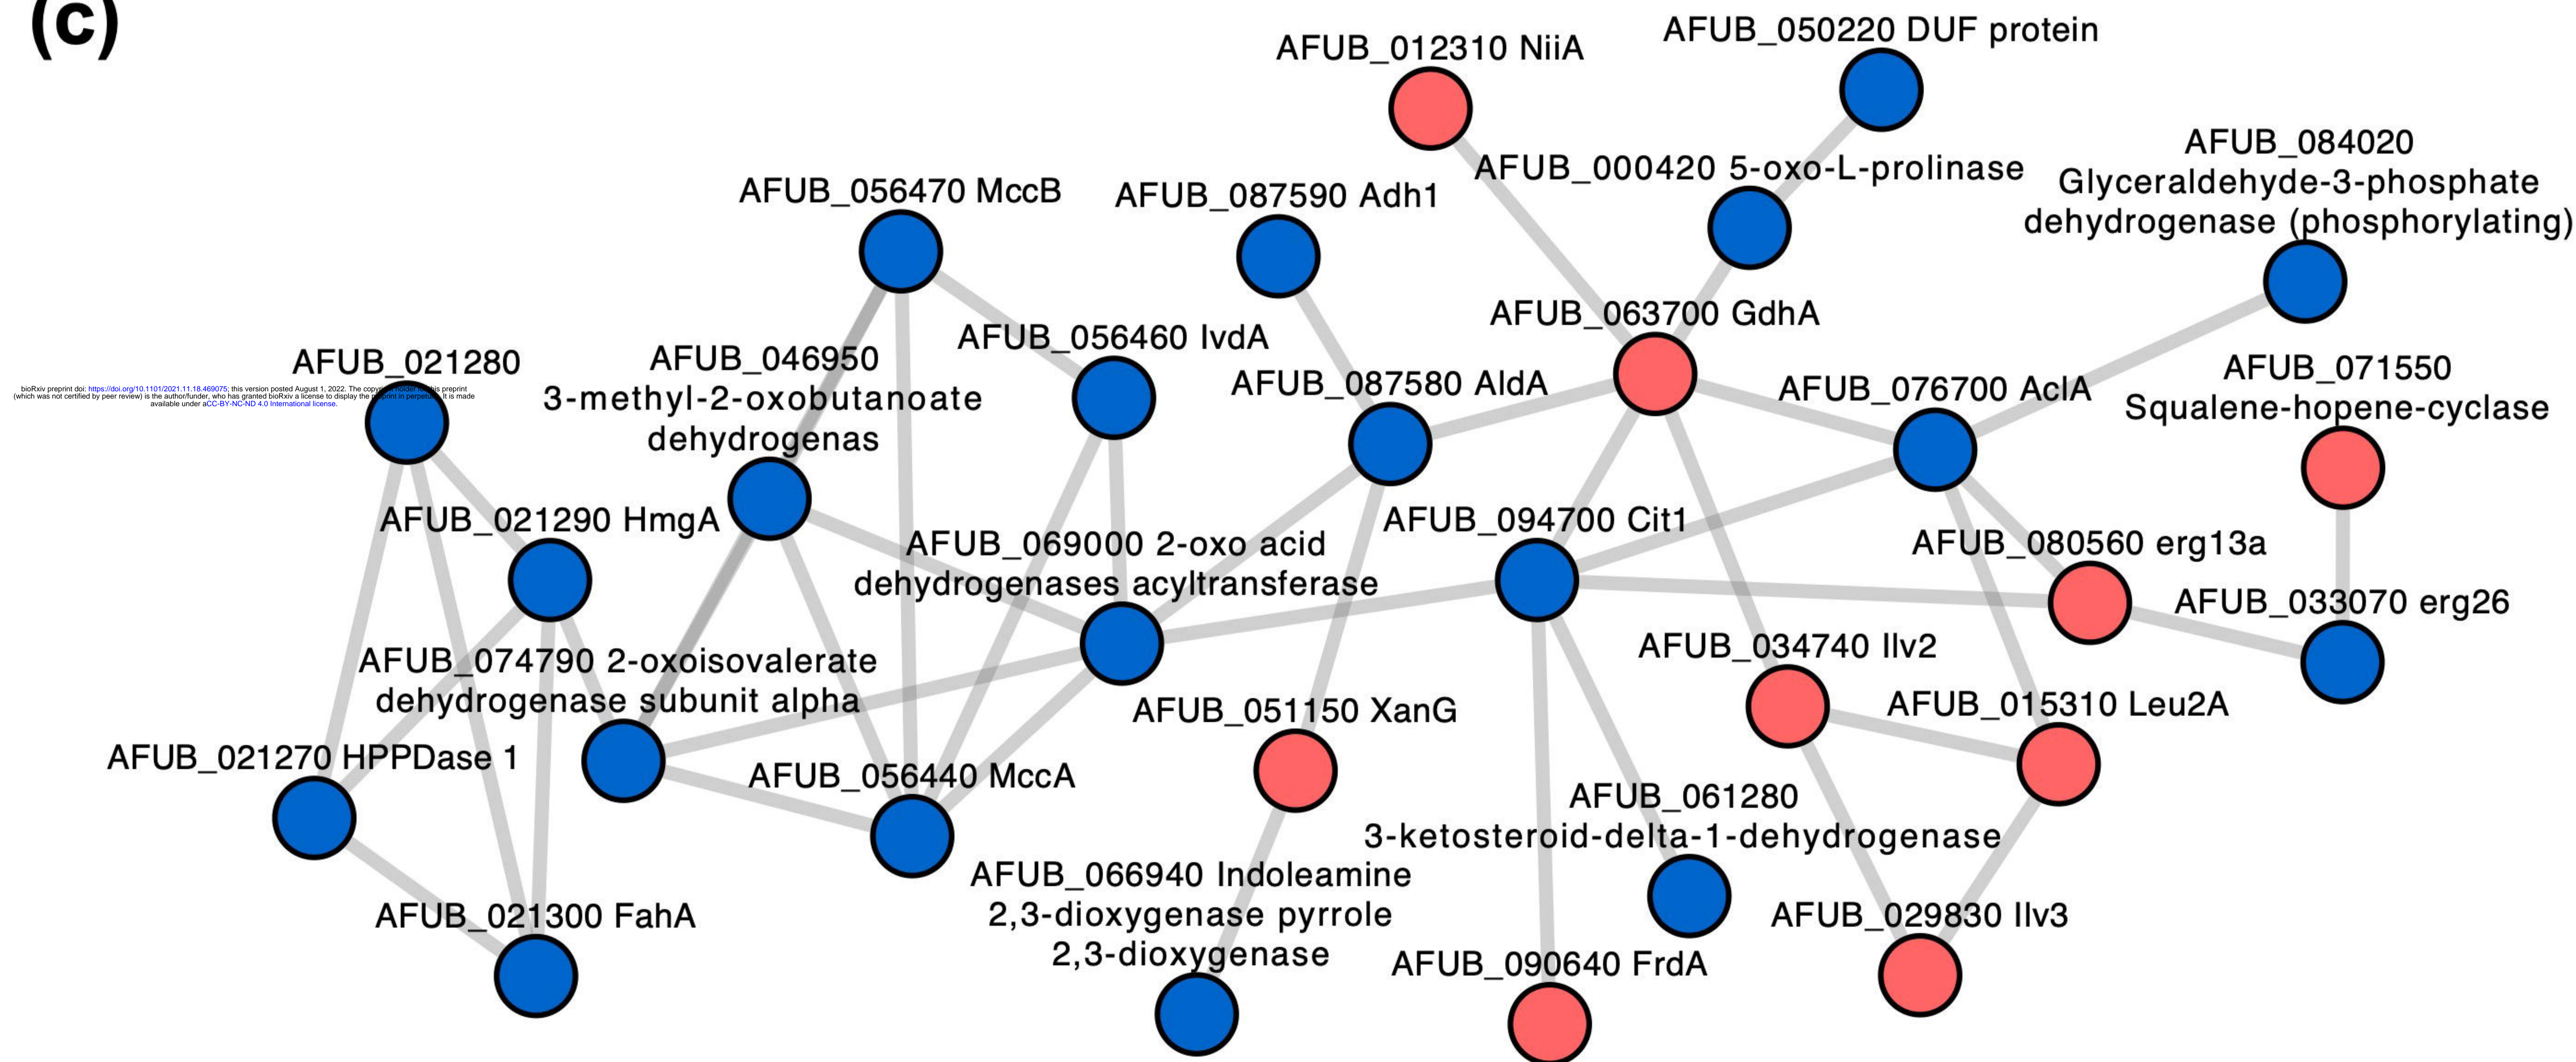



**(a)** $\Delta devR$ 

RPMI-1640

Olorofim

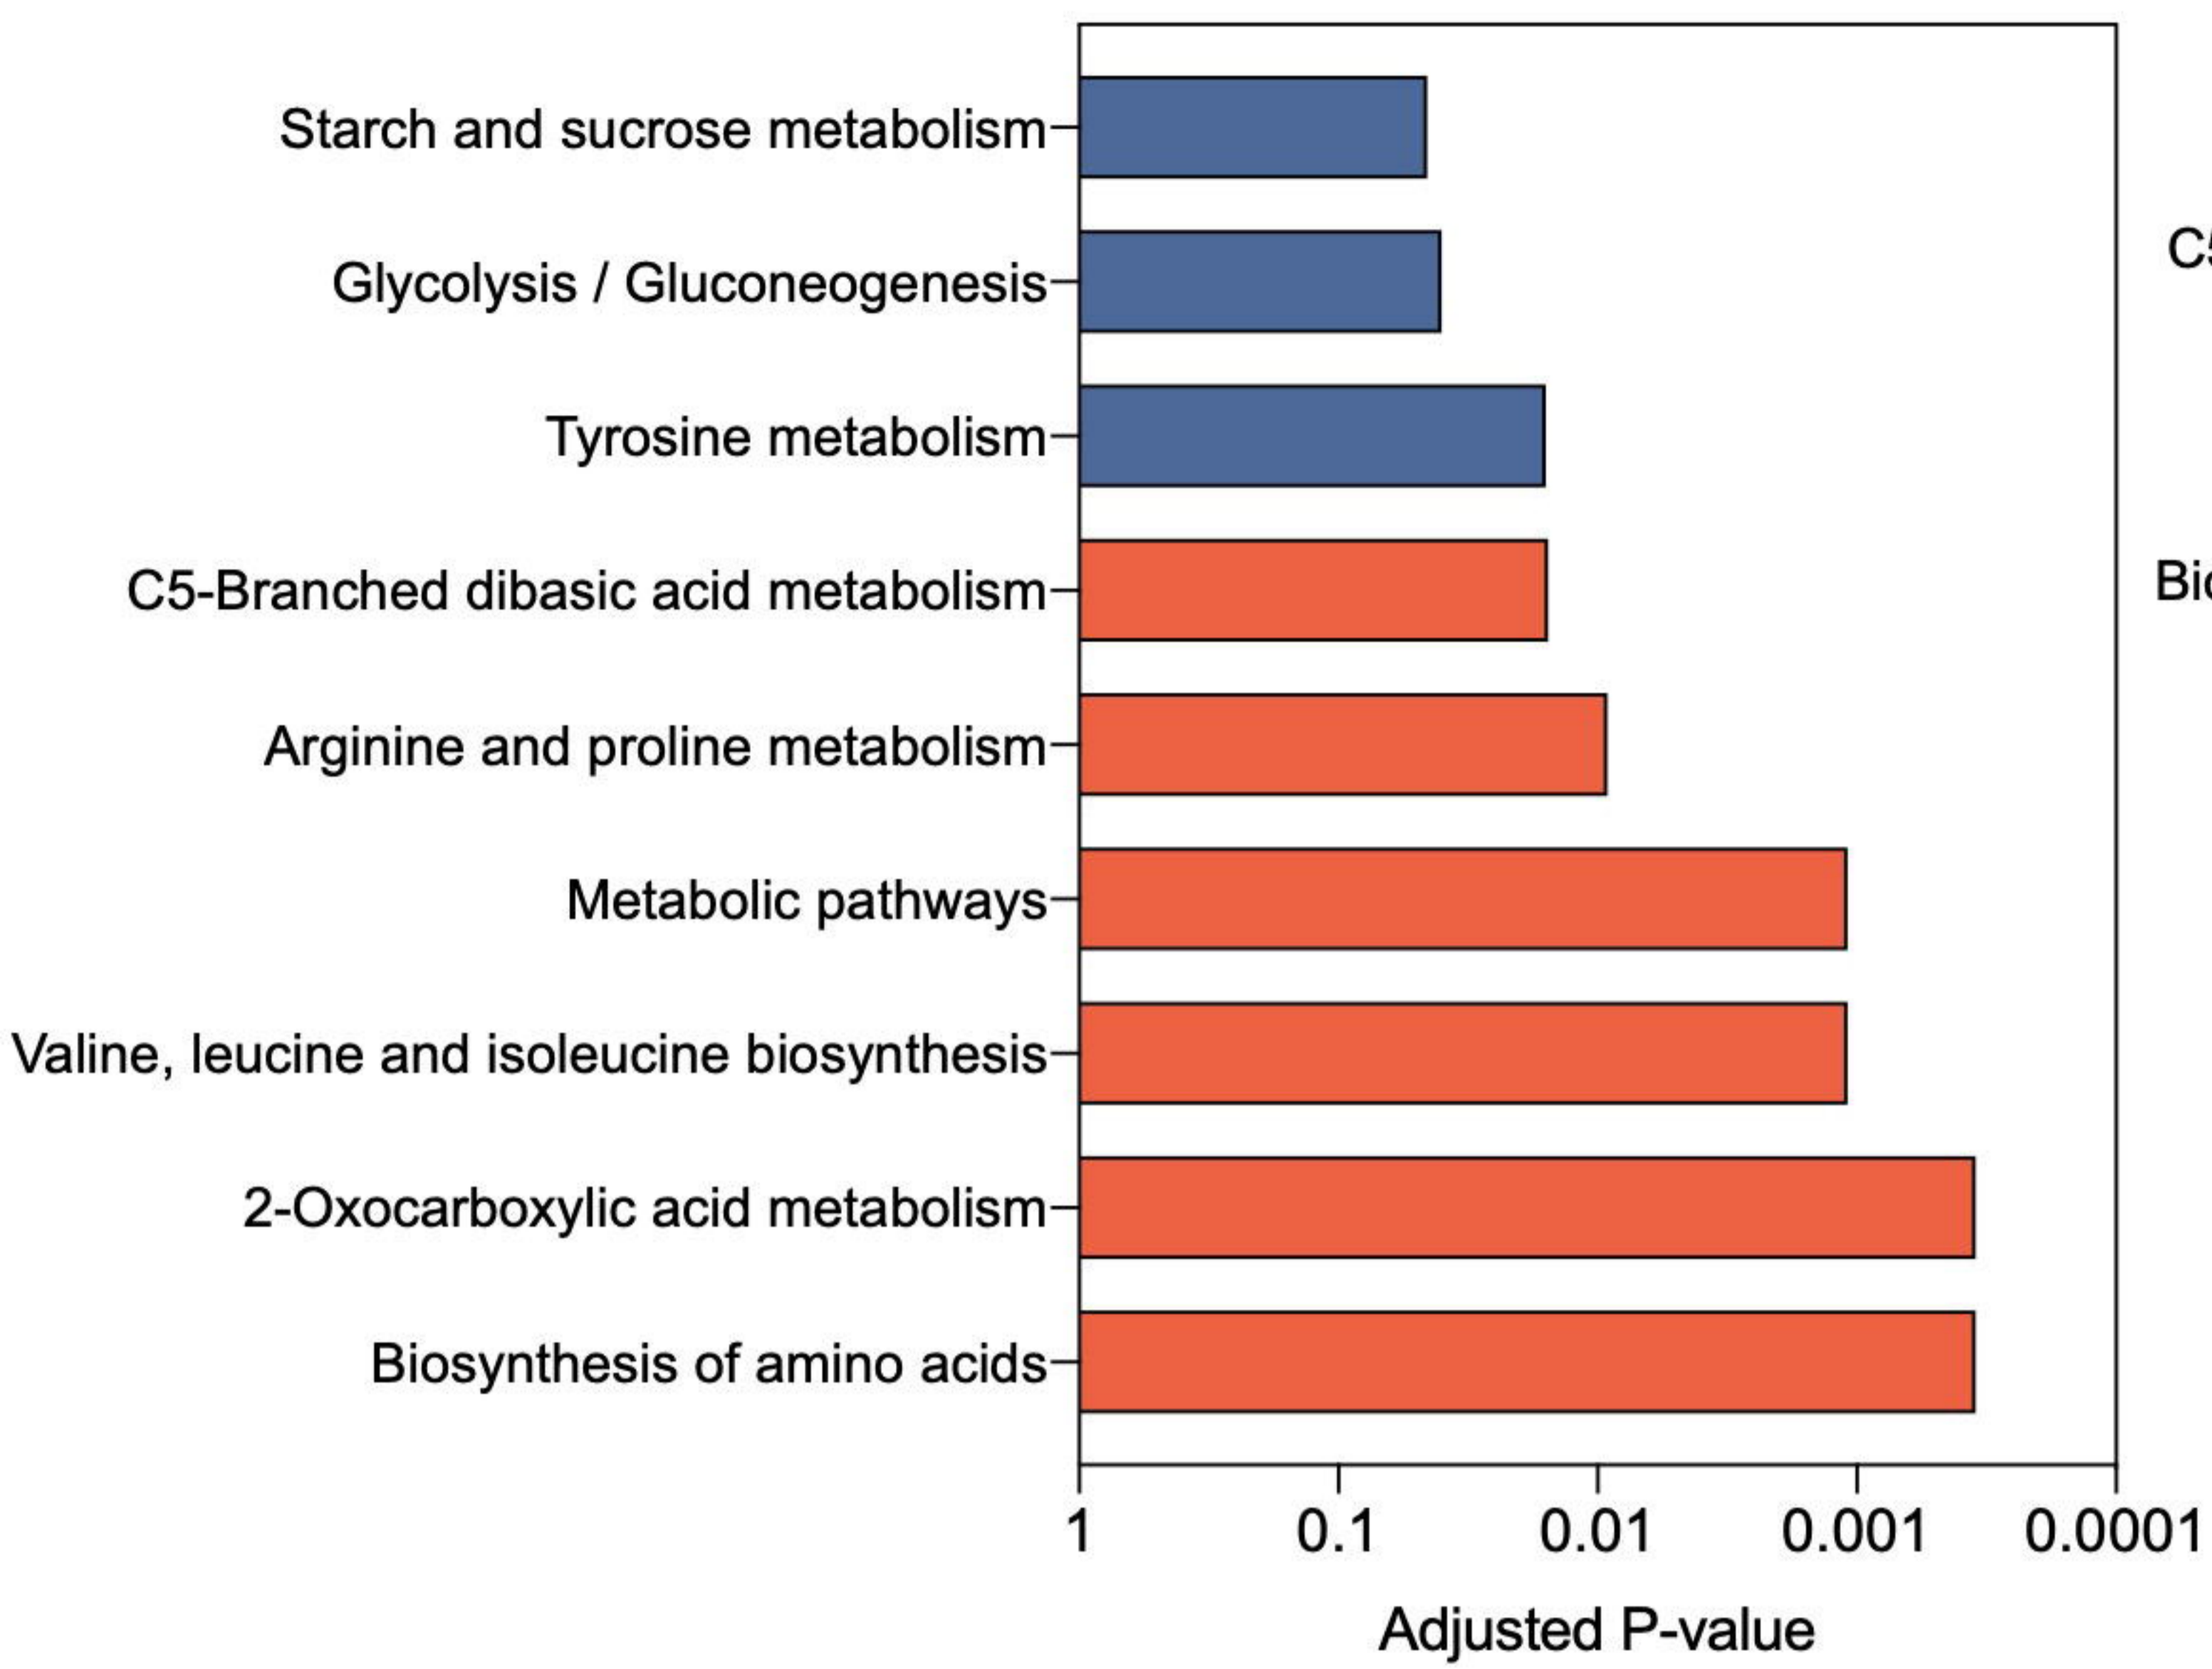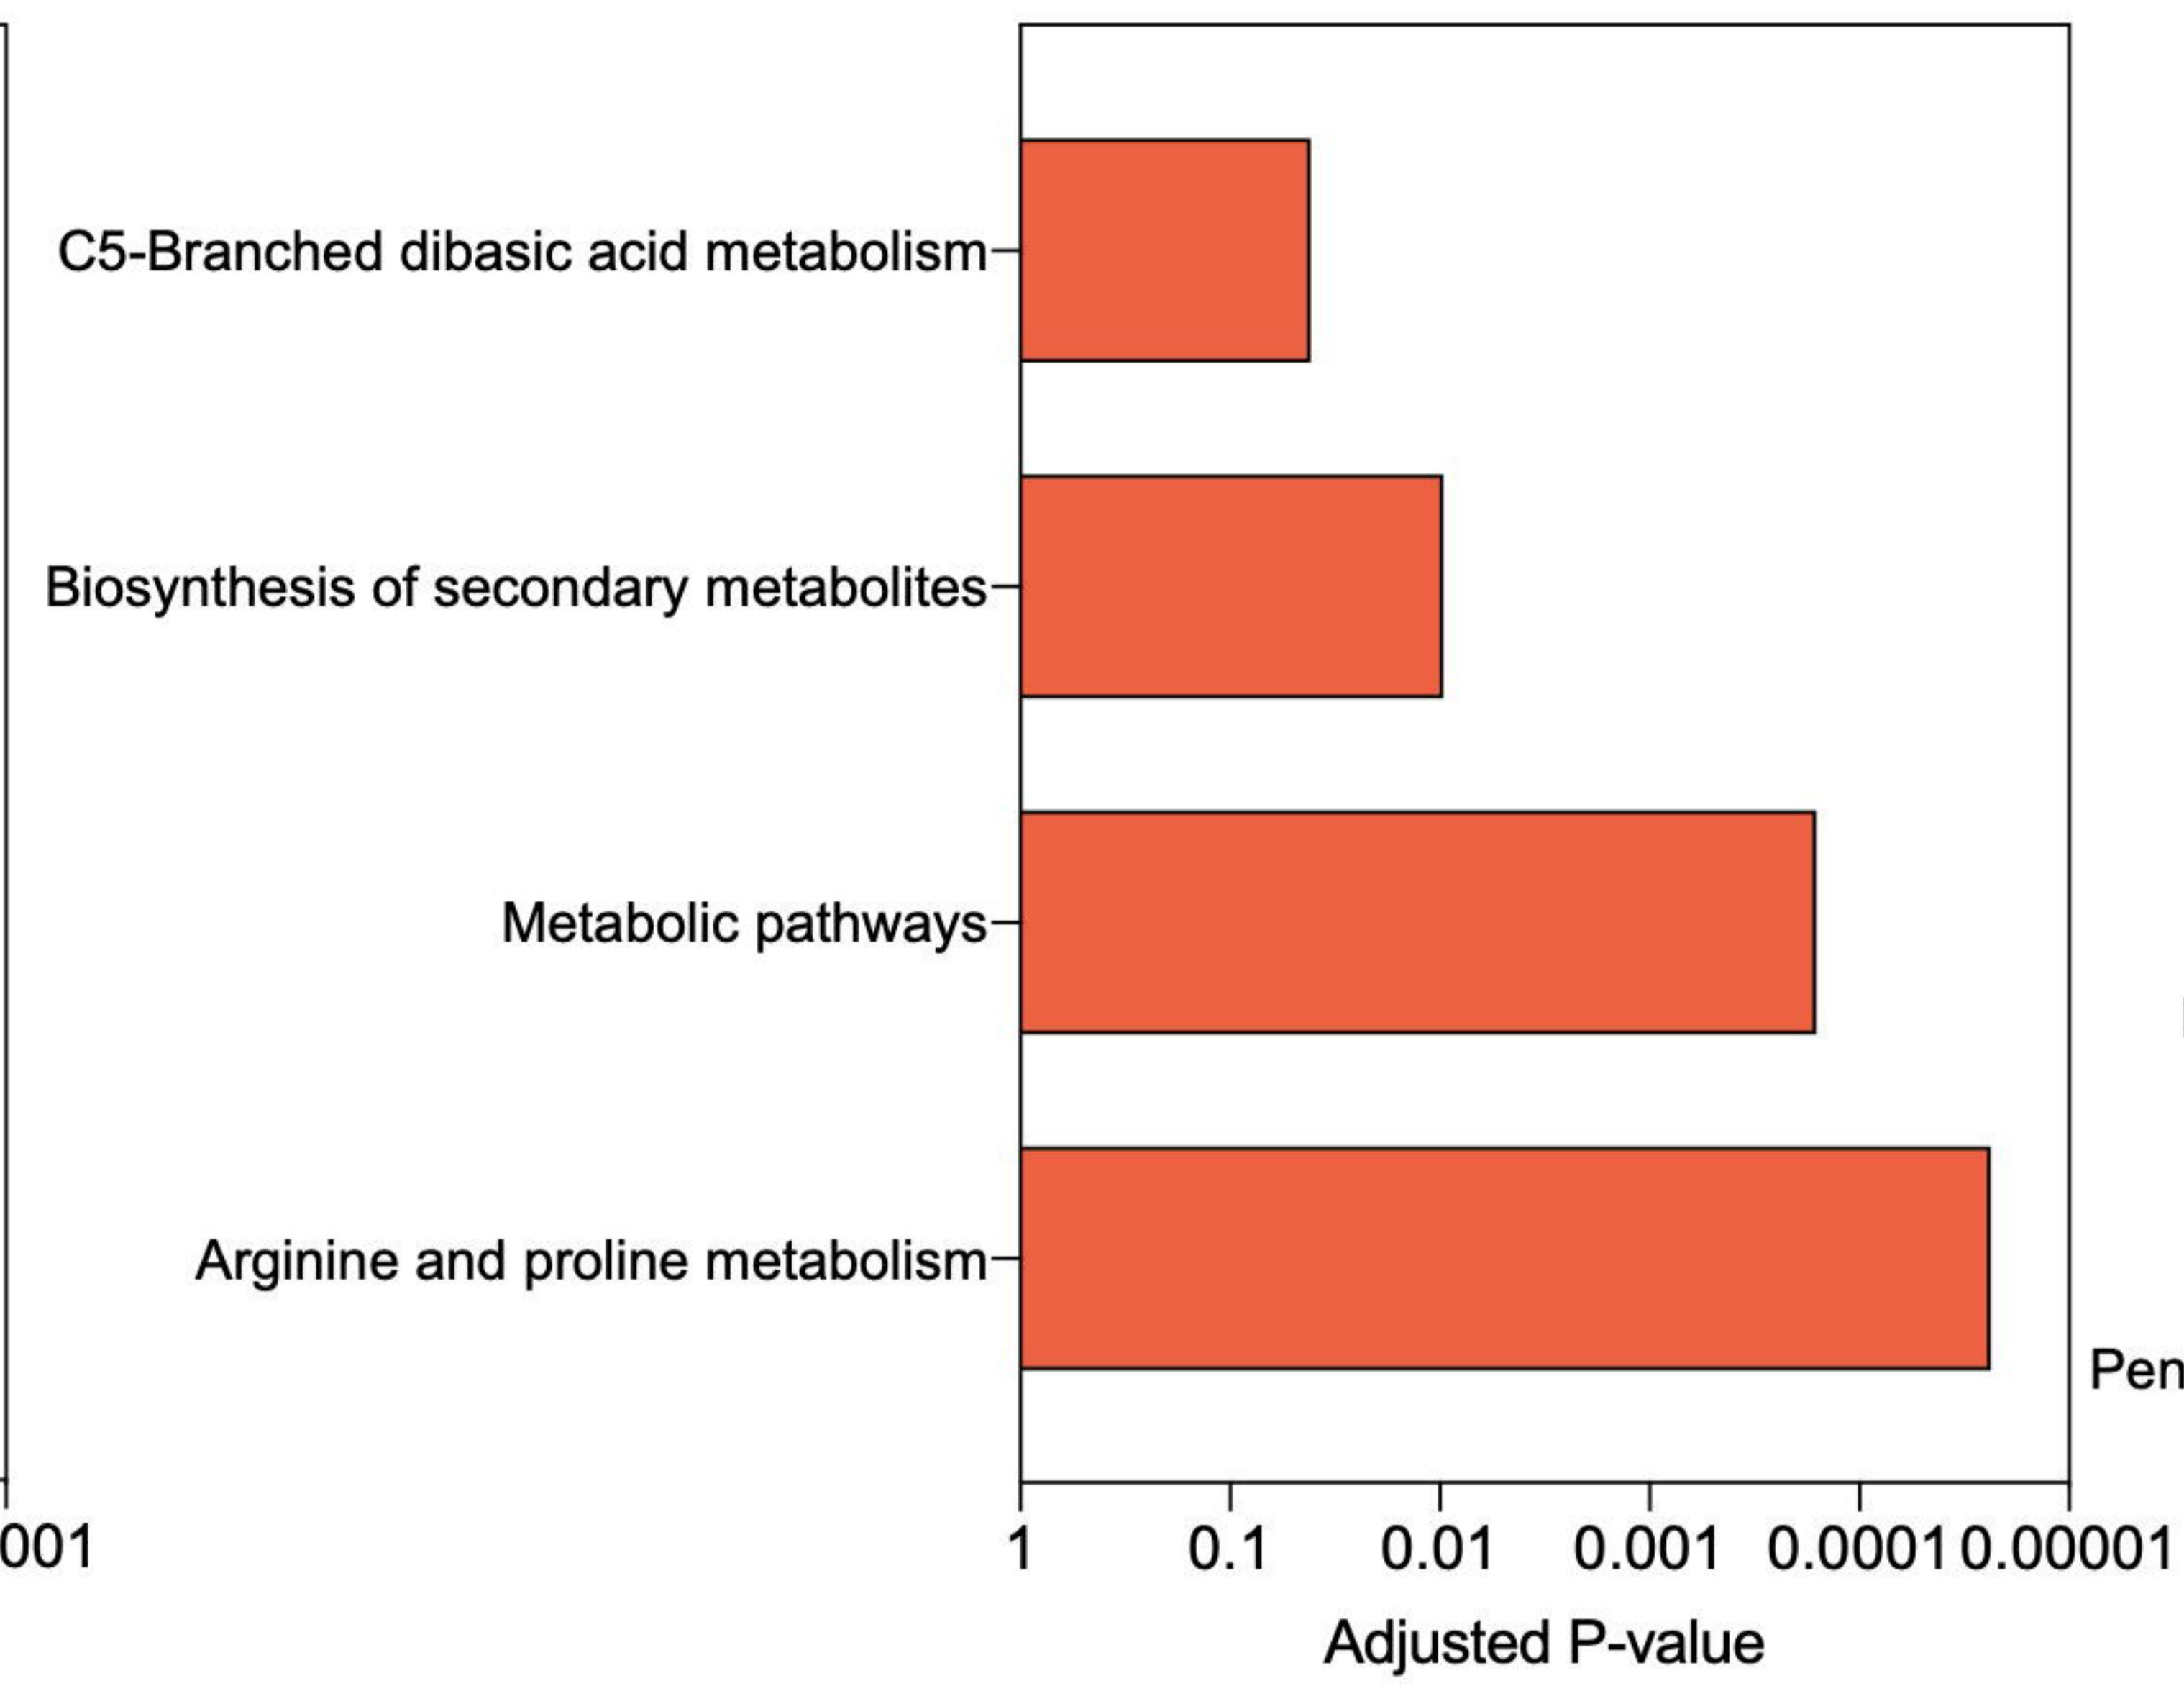**(c)** $\Delta acdX$ 

RPMI-1640

Olorofim

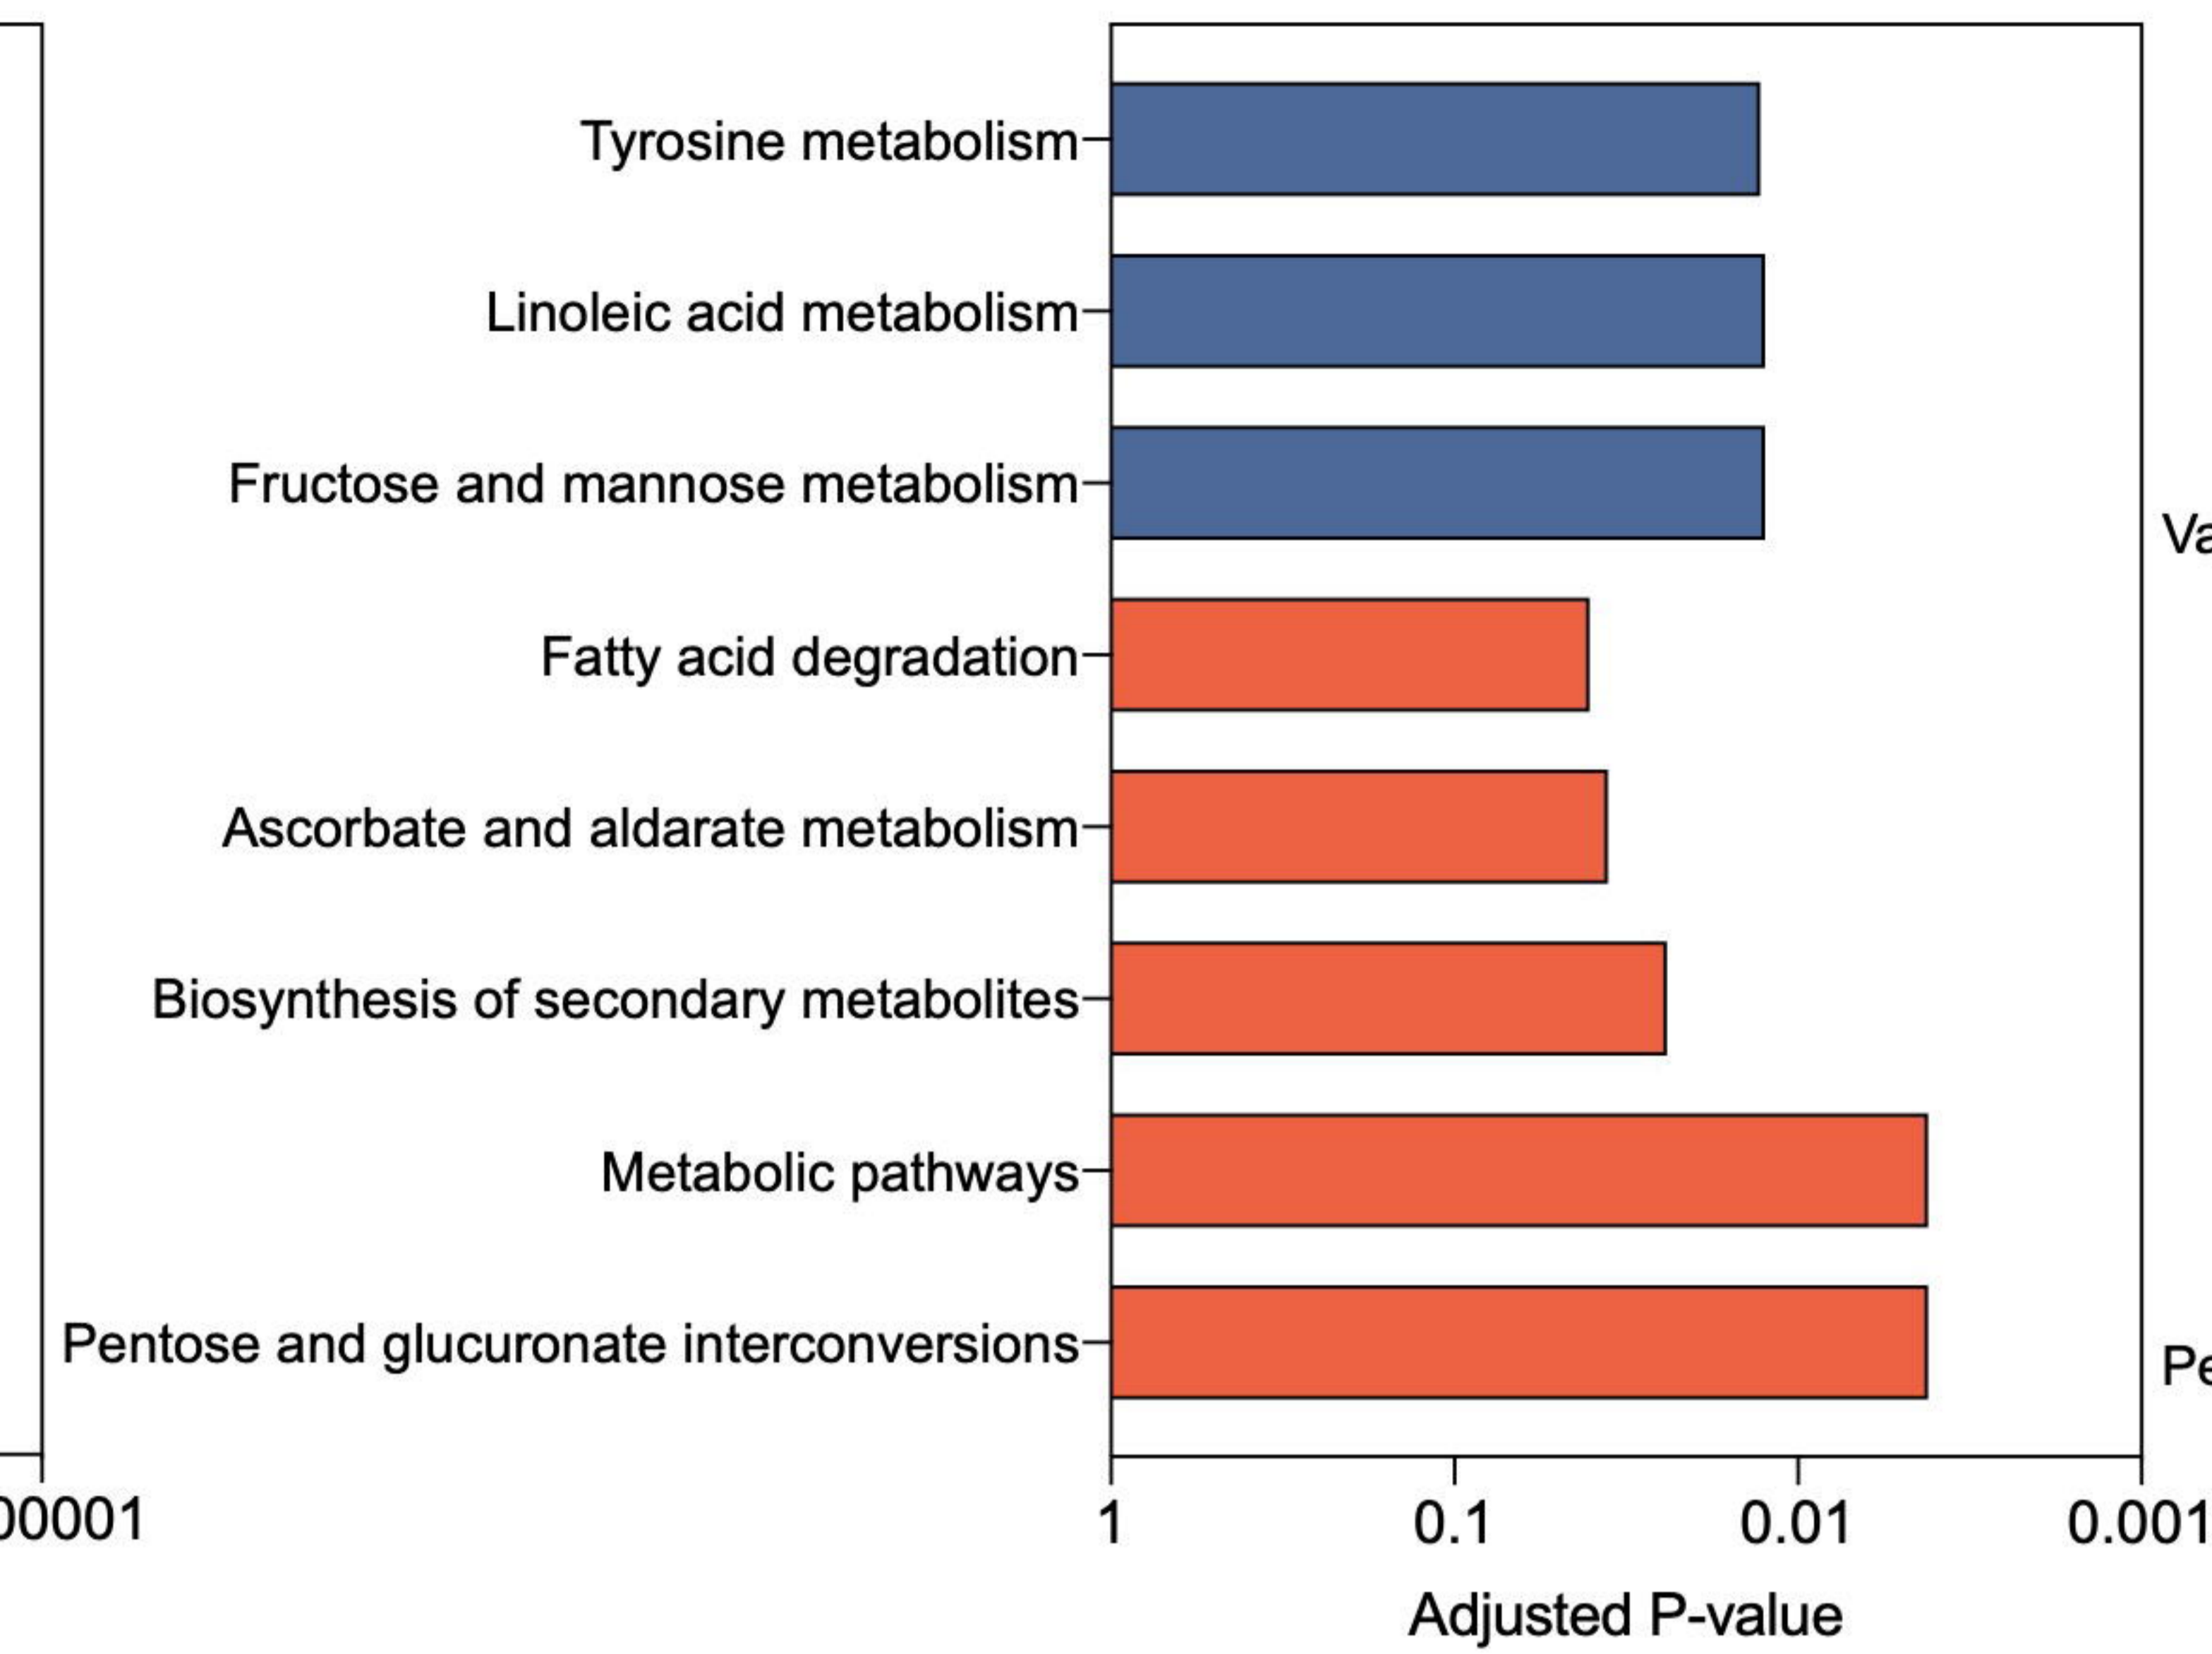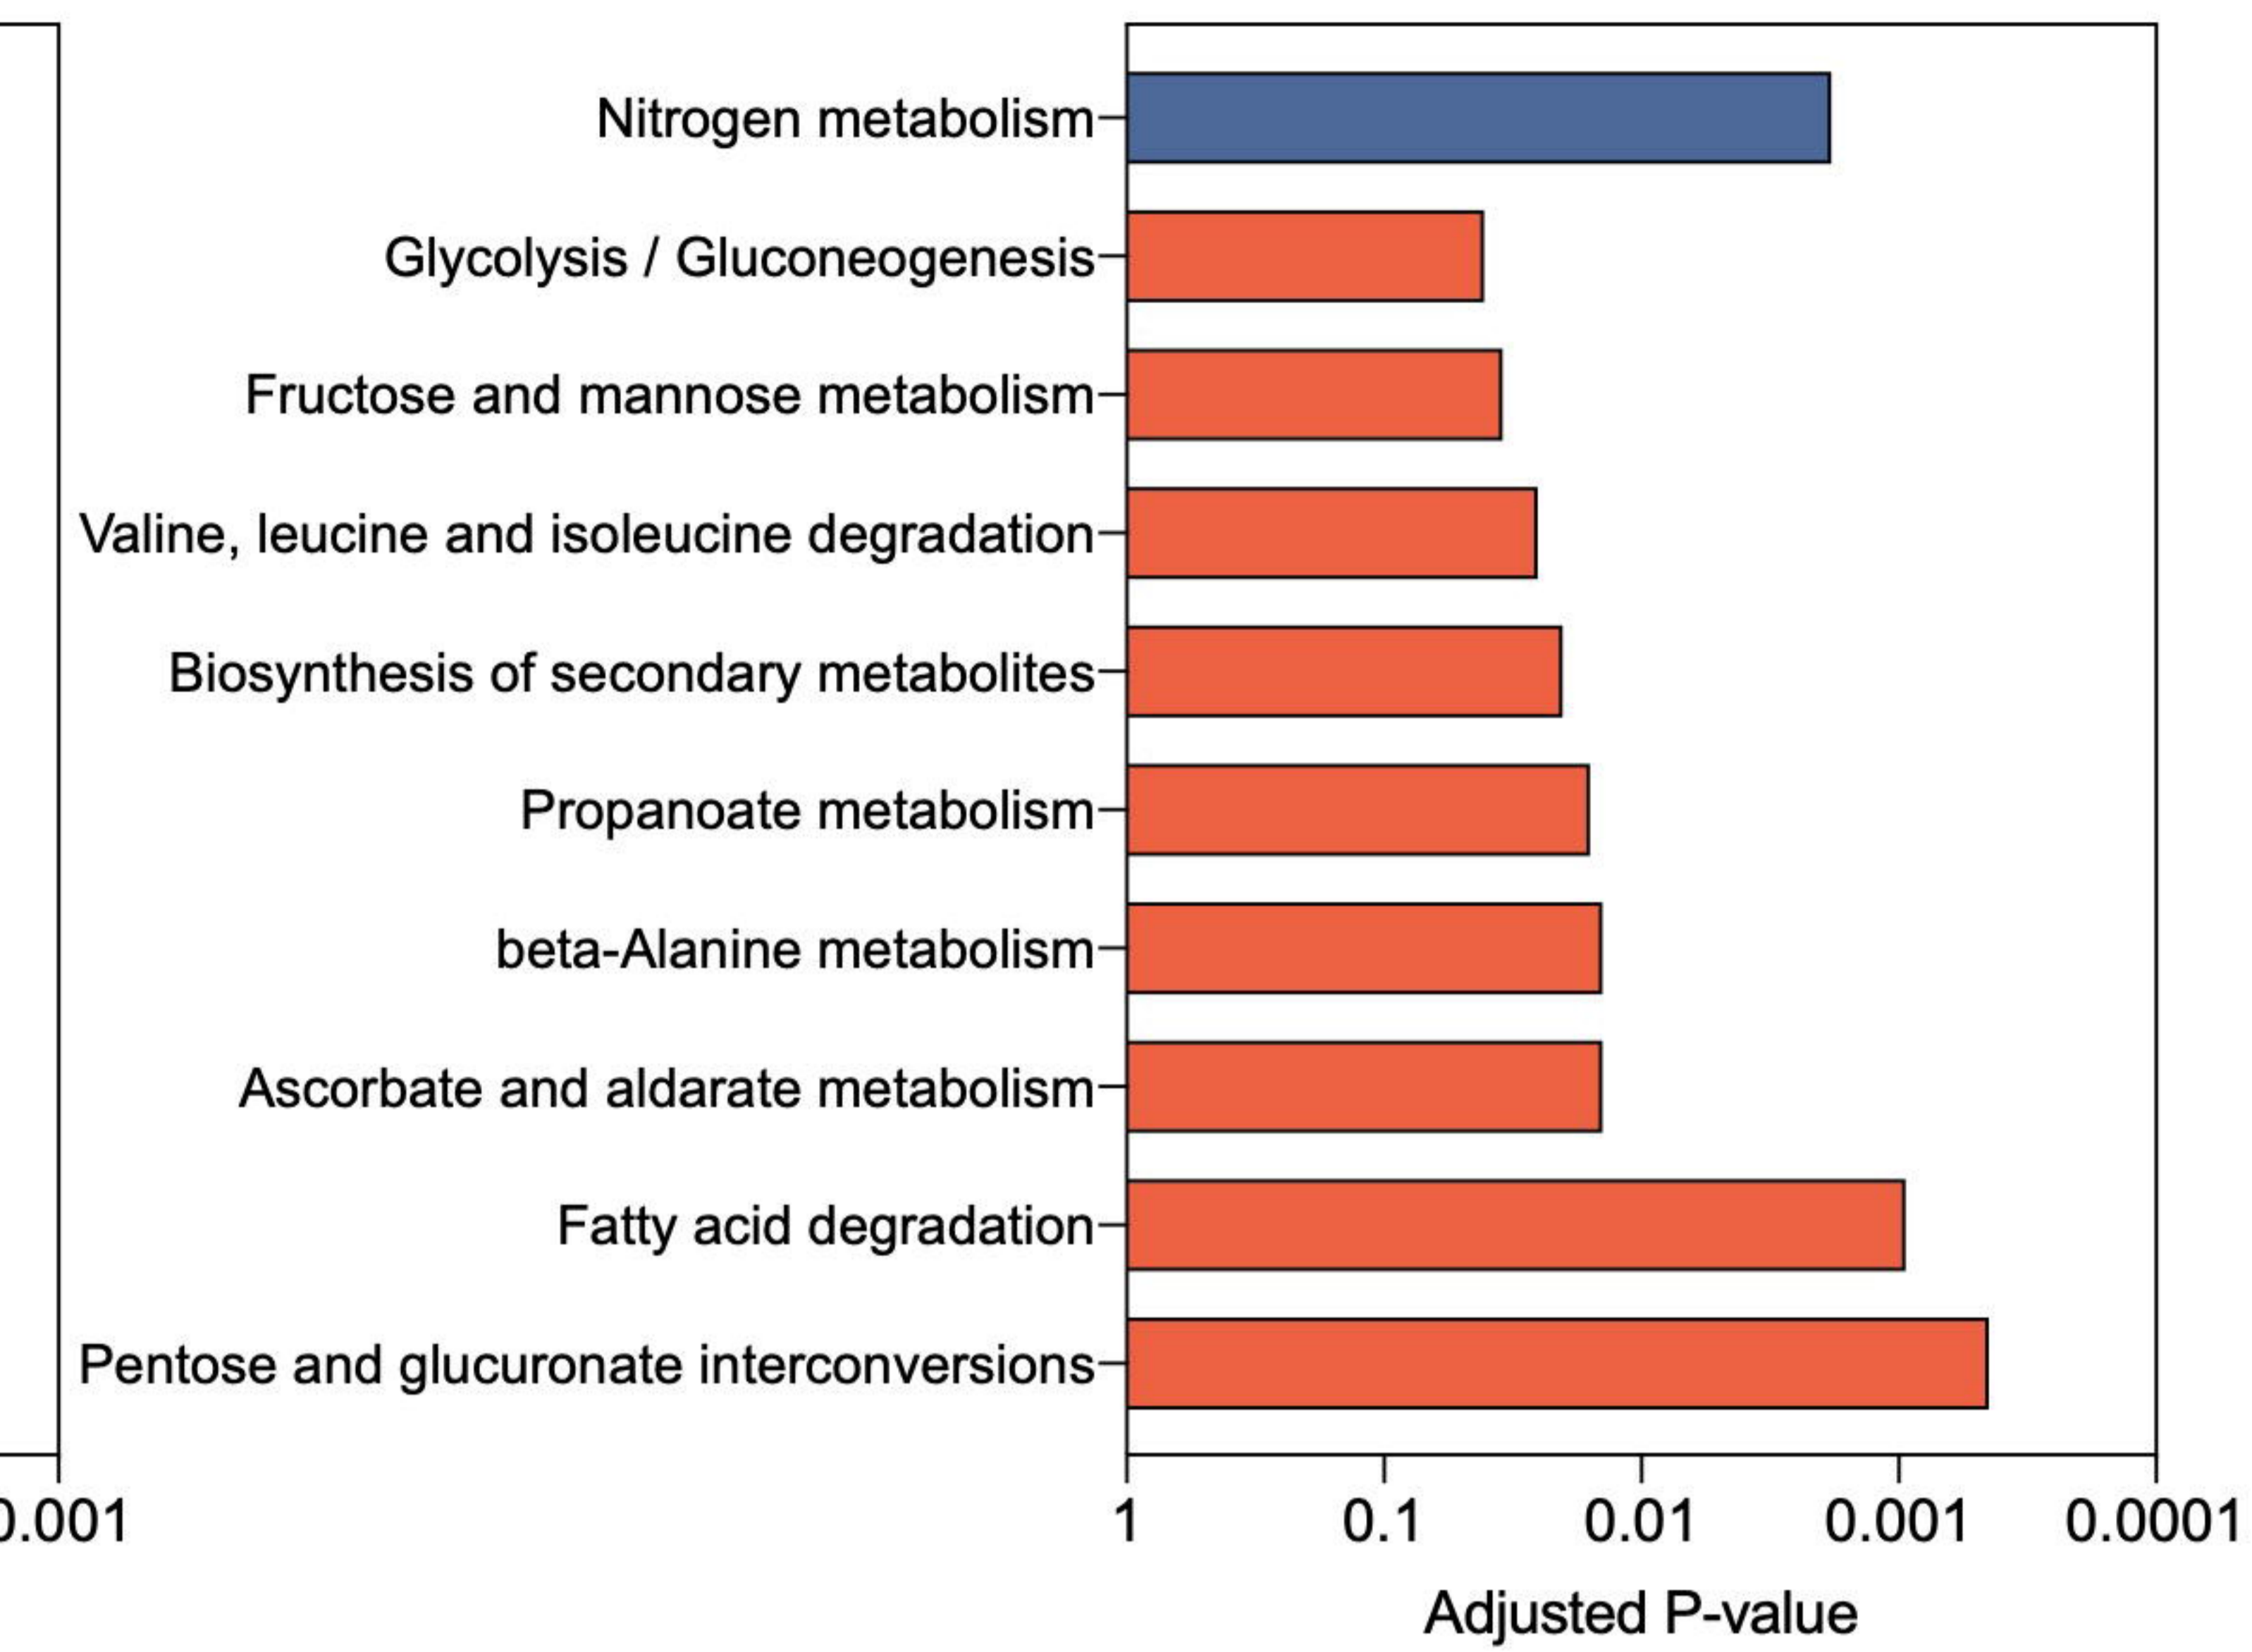**(b)**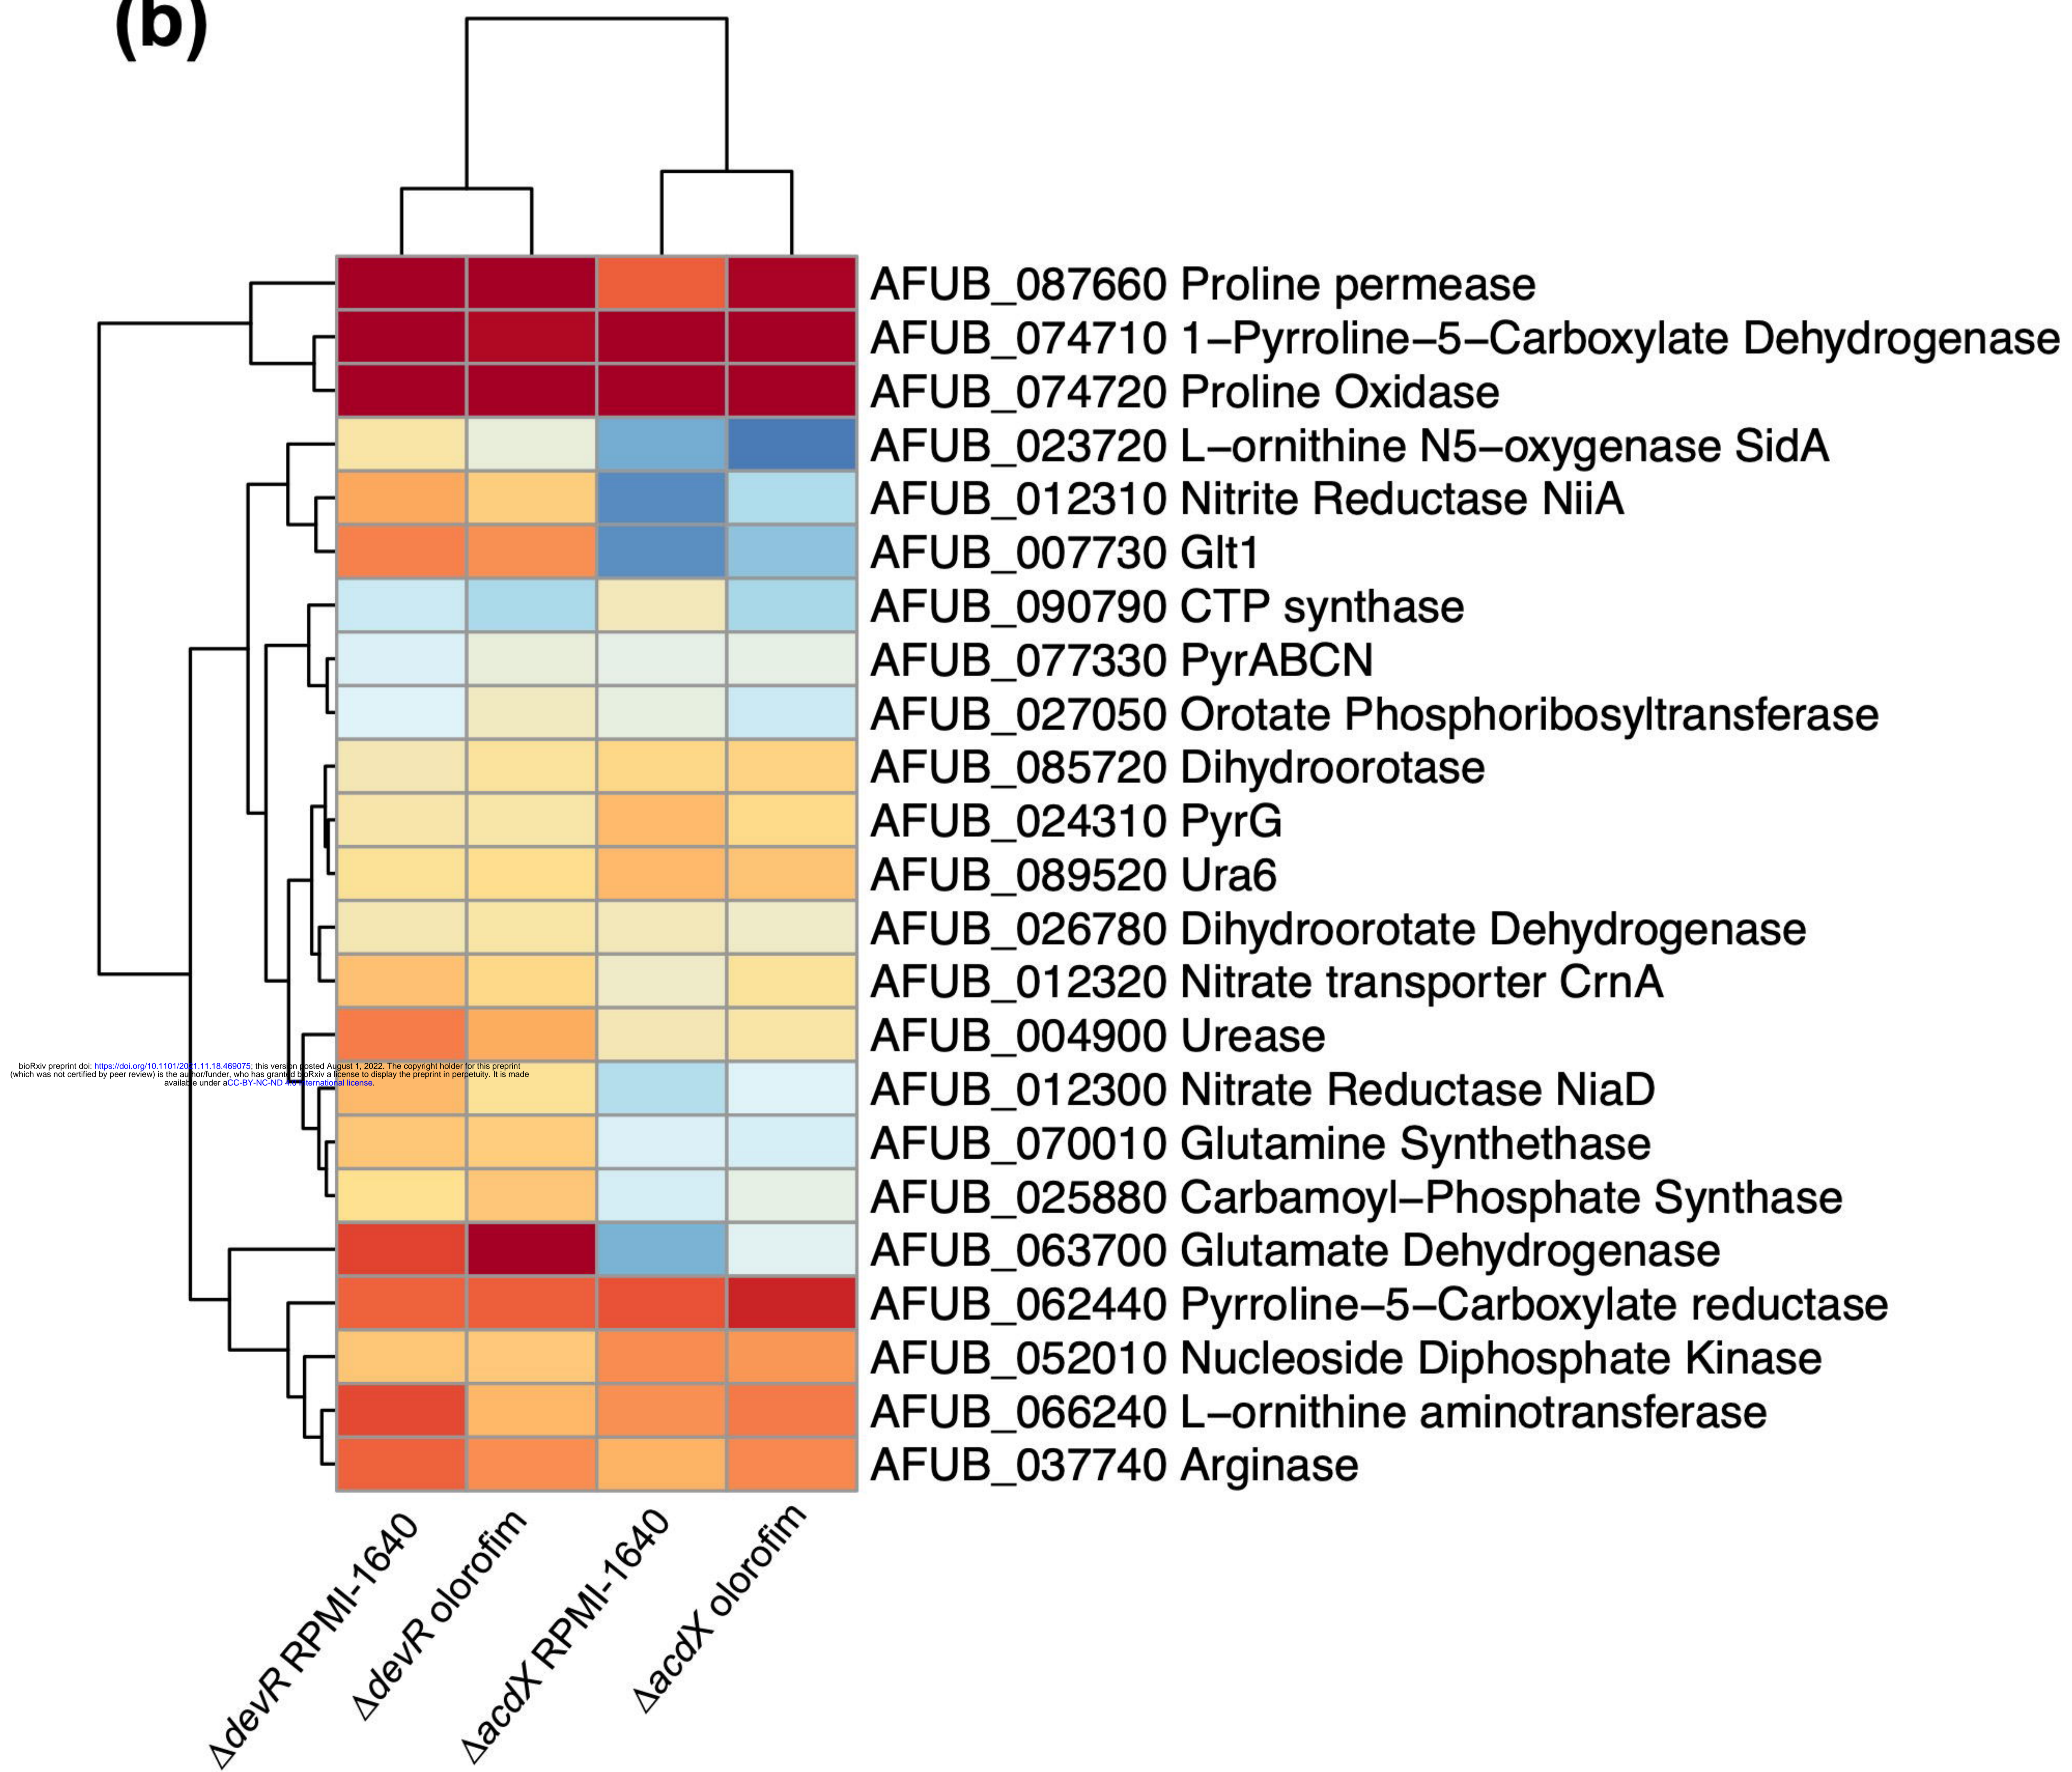**(d)**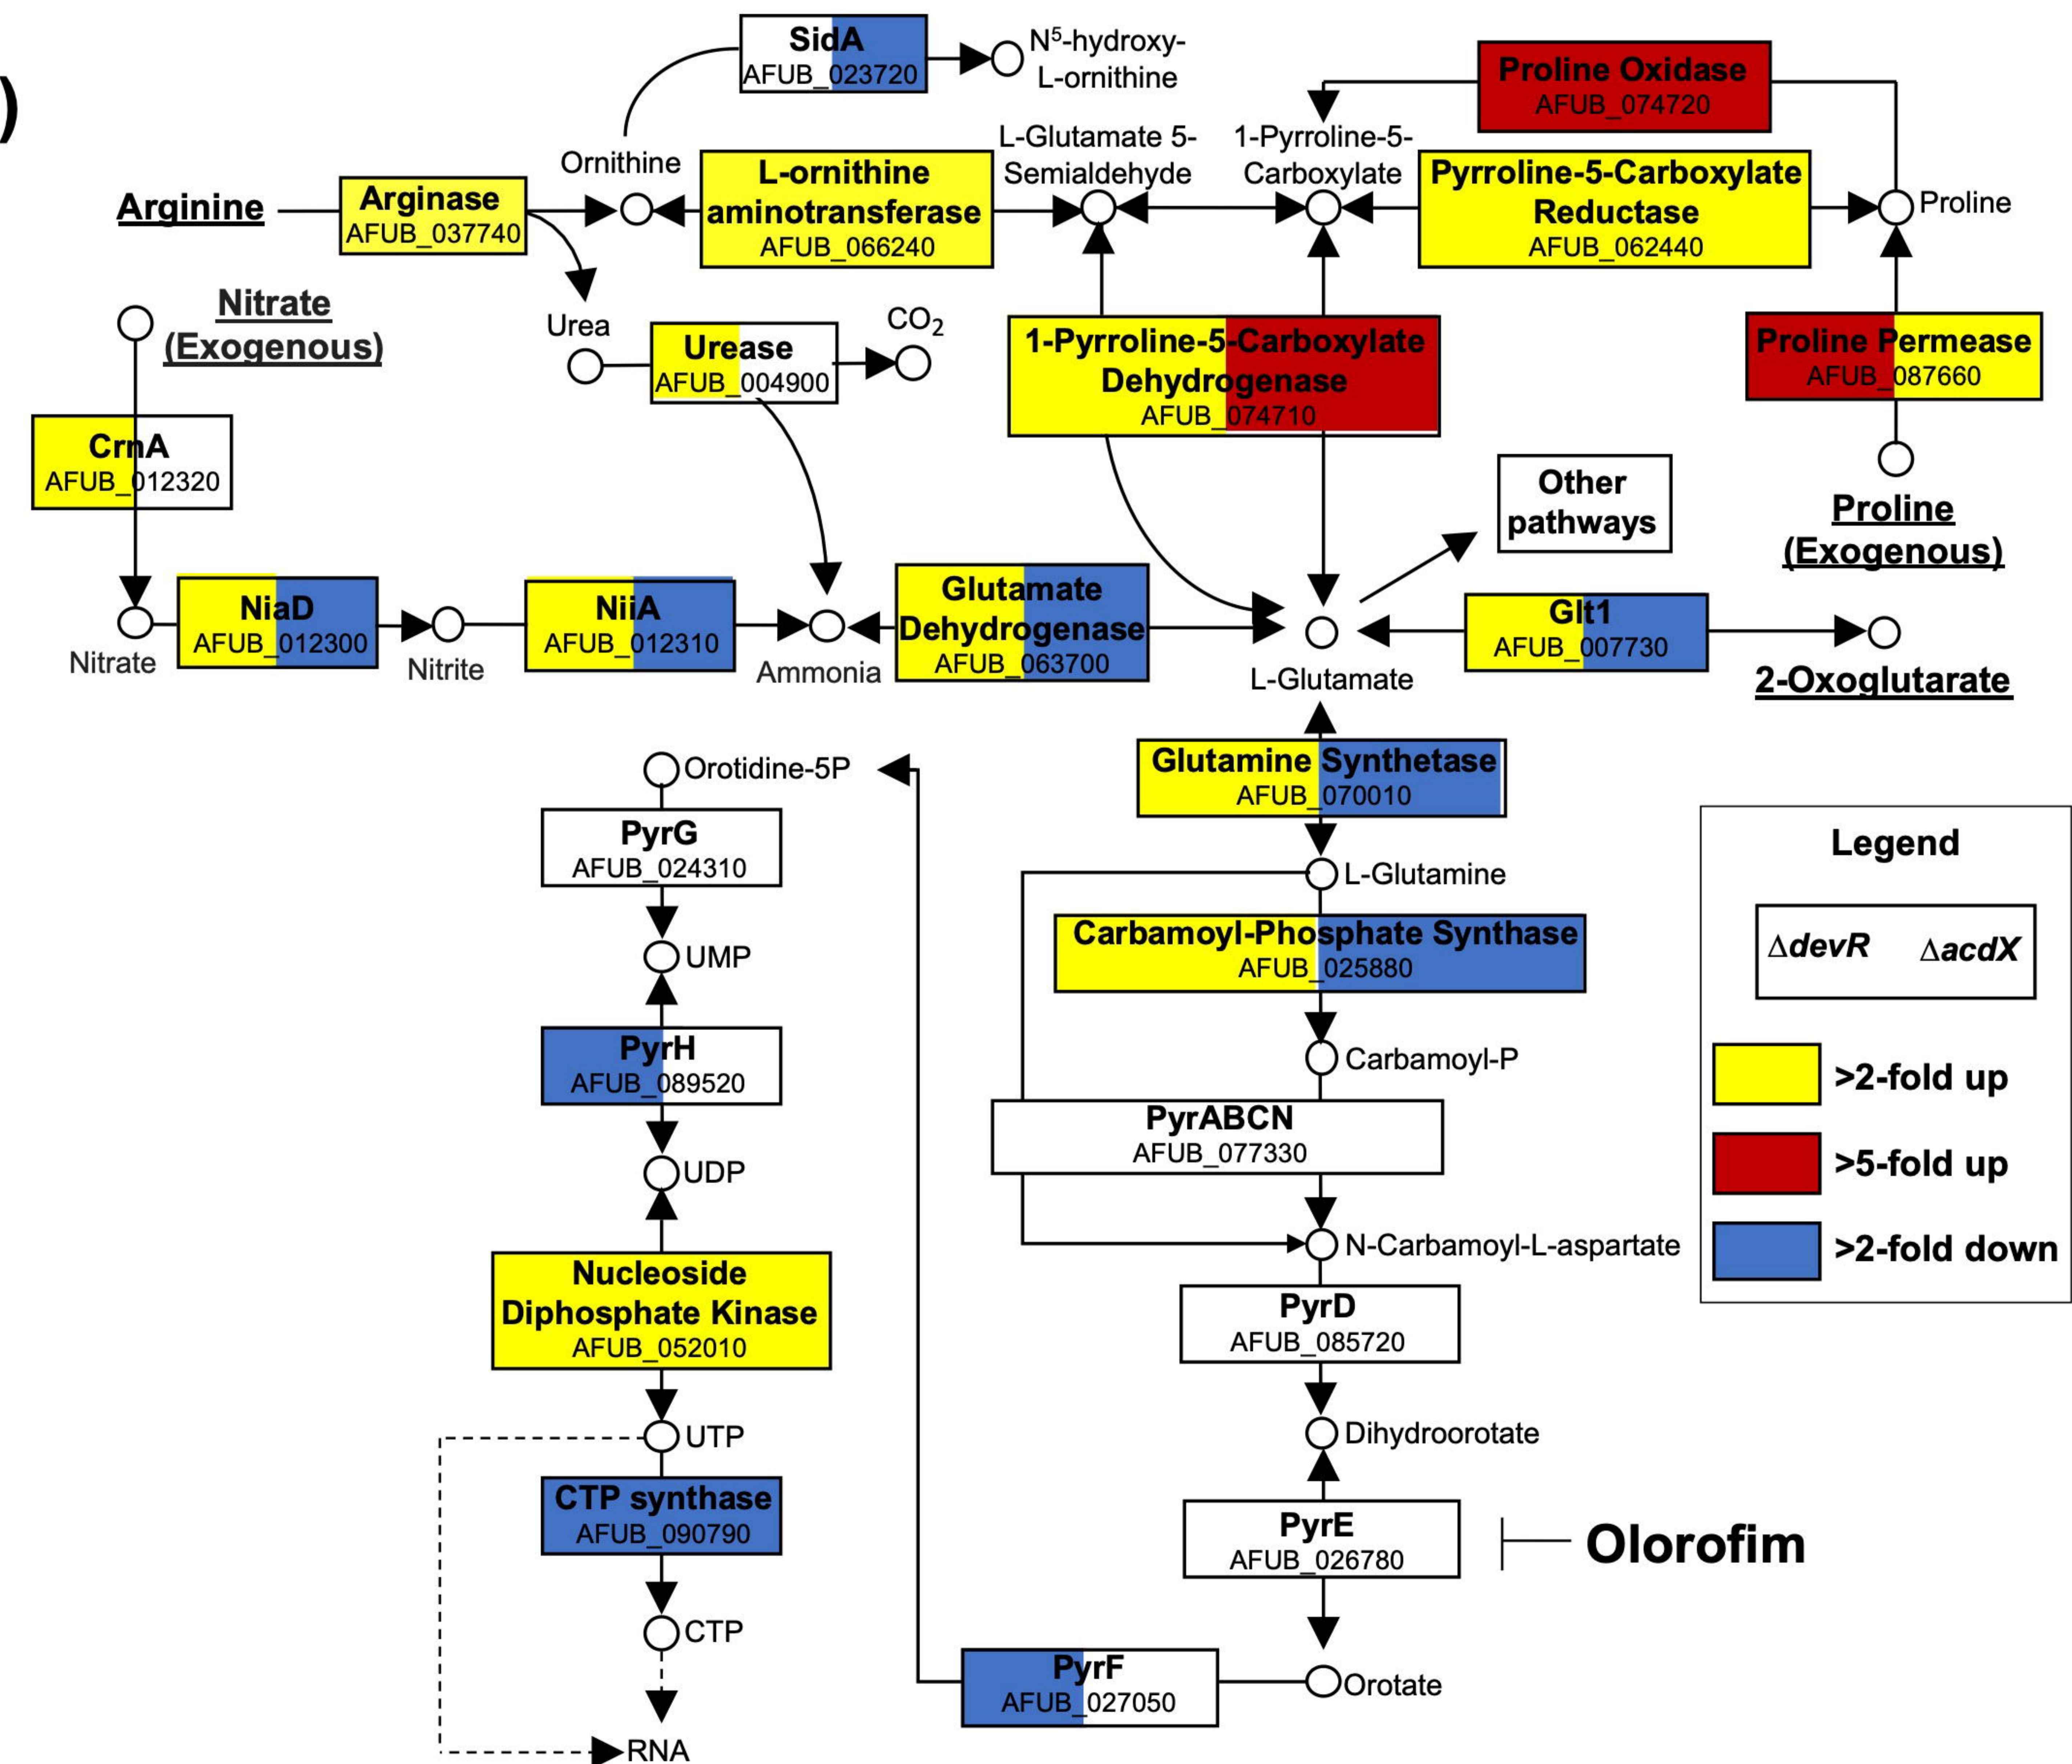



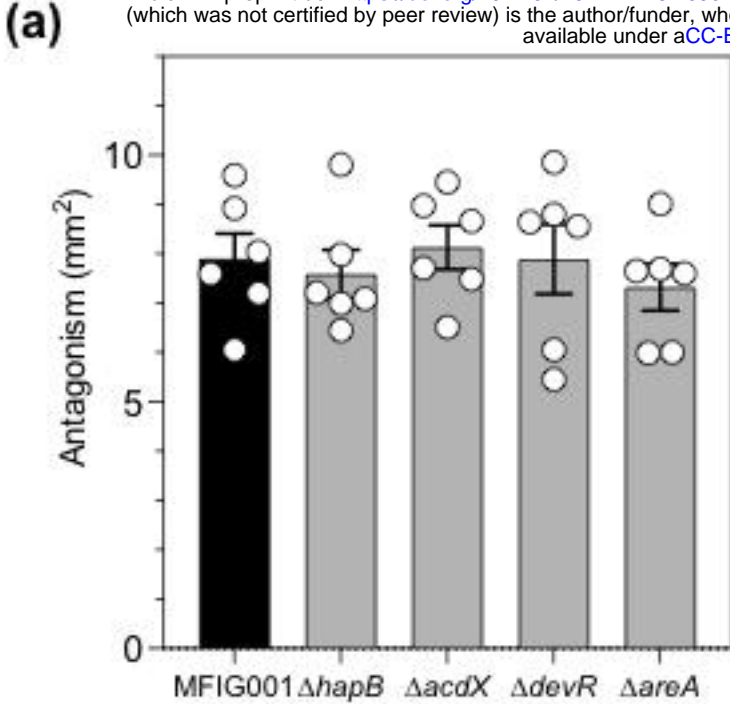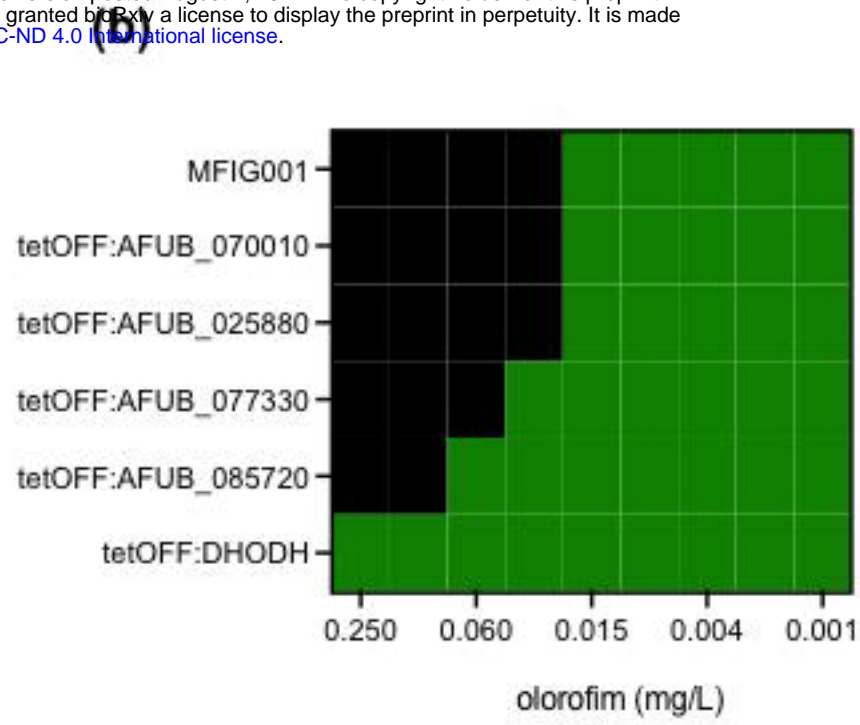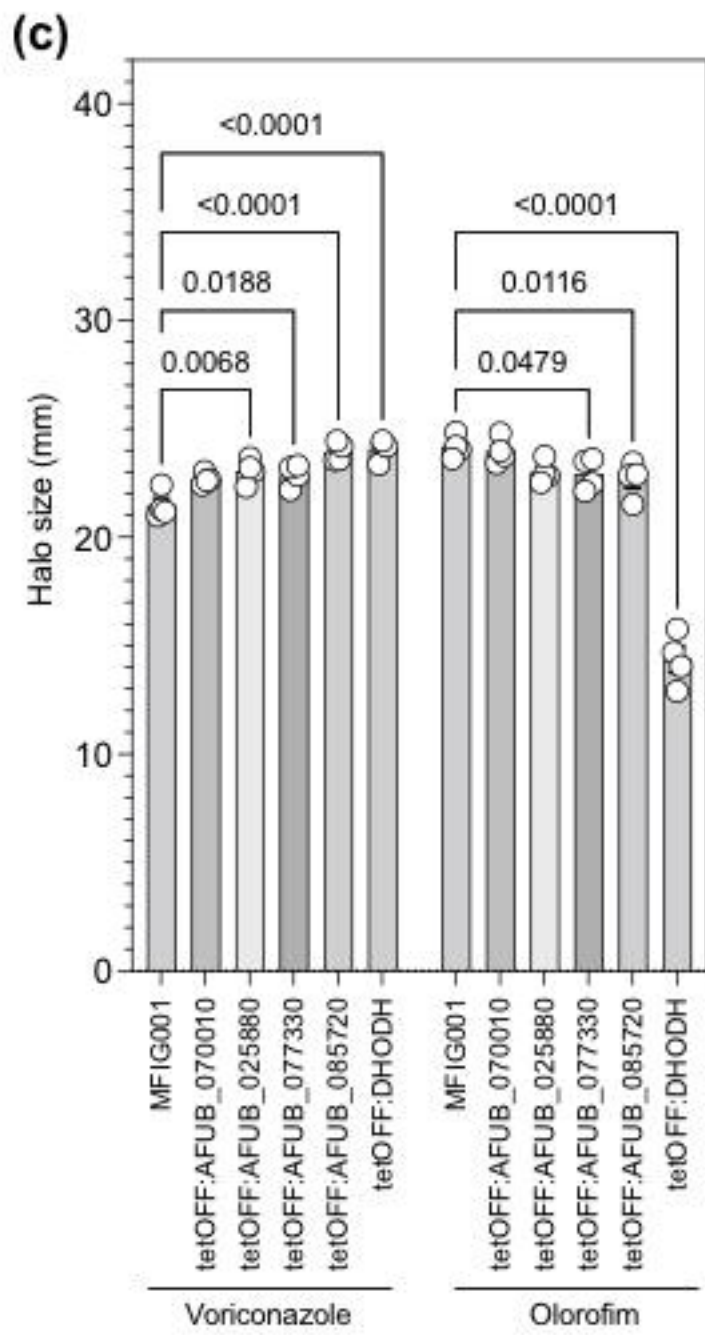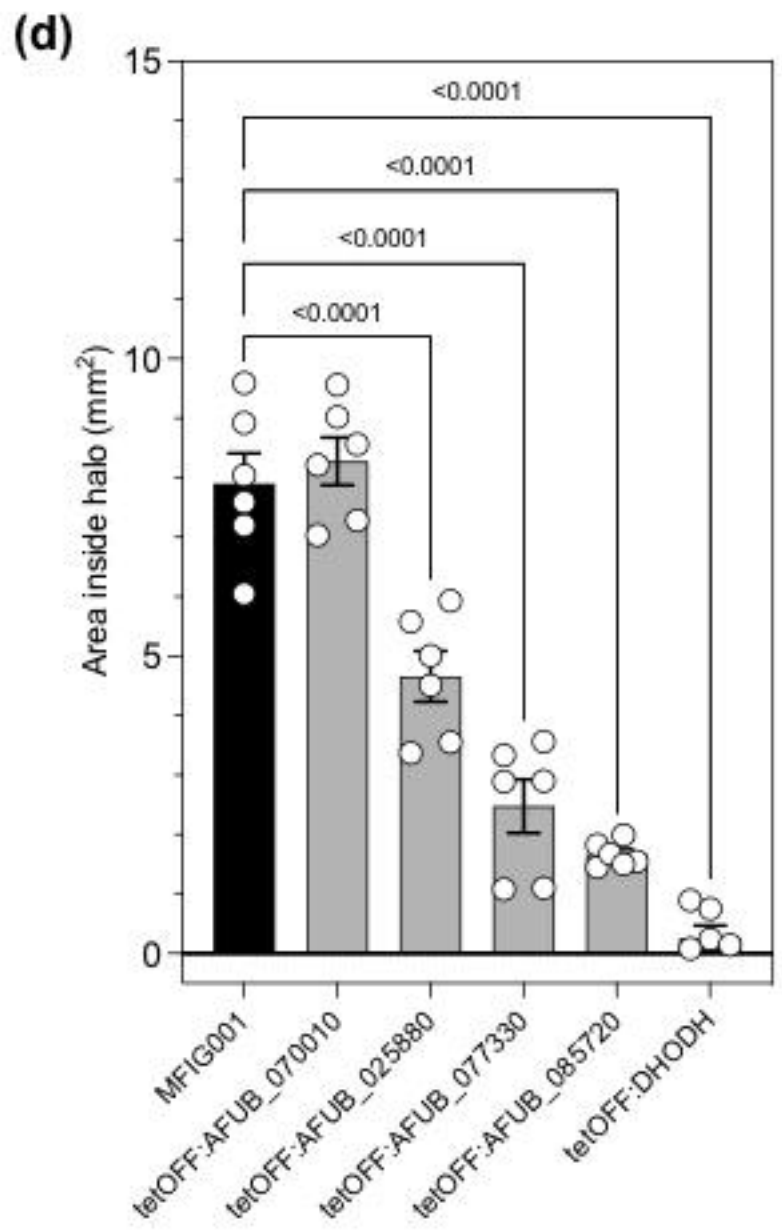

# Itraconazole

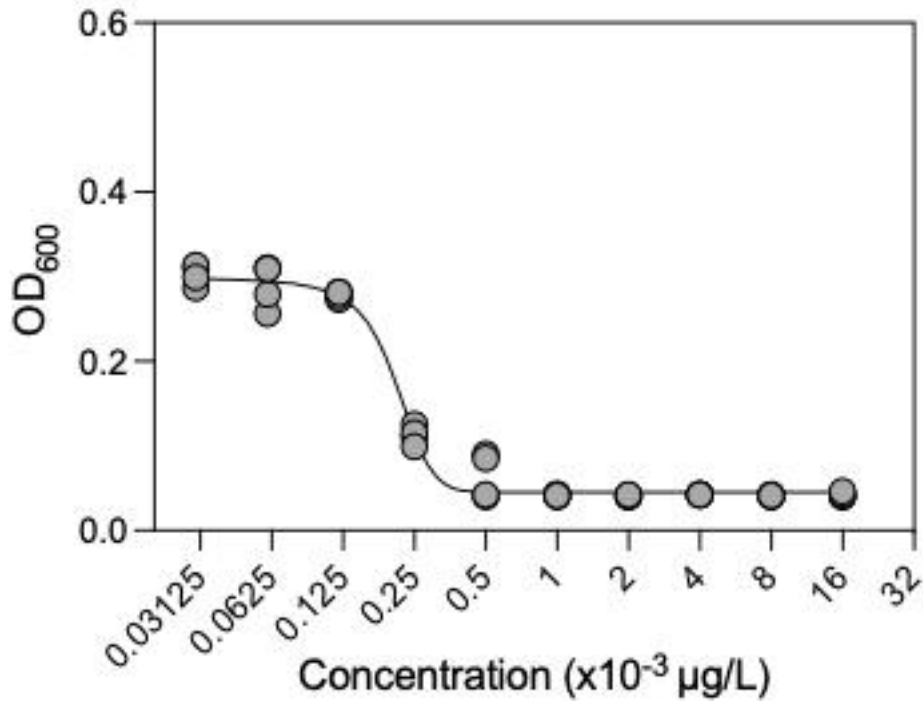



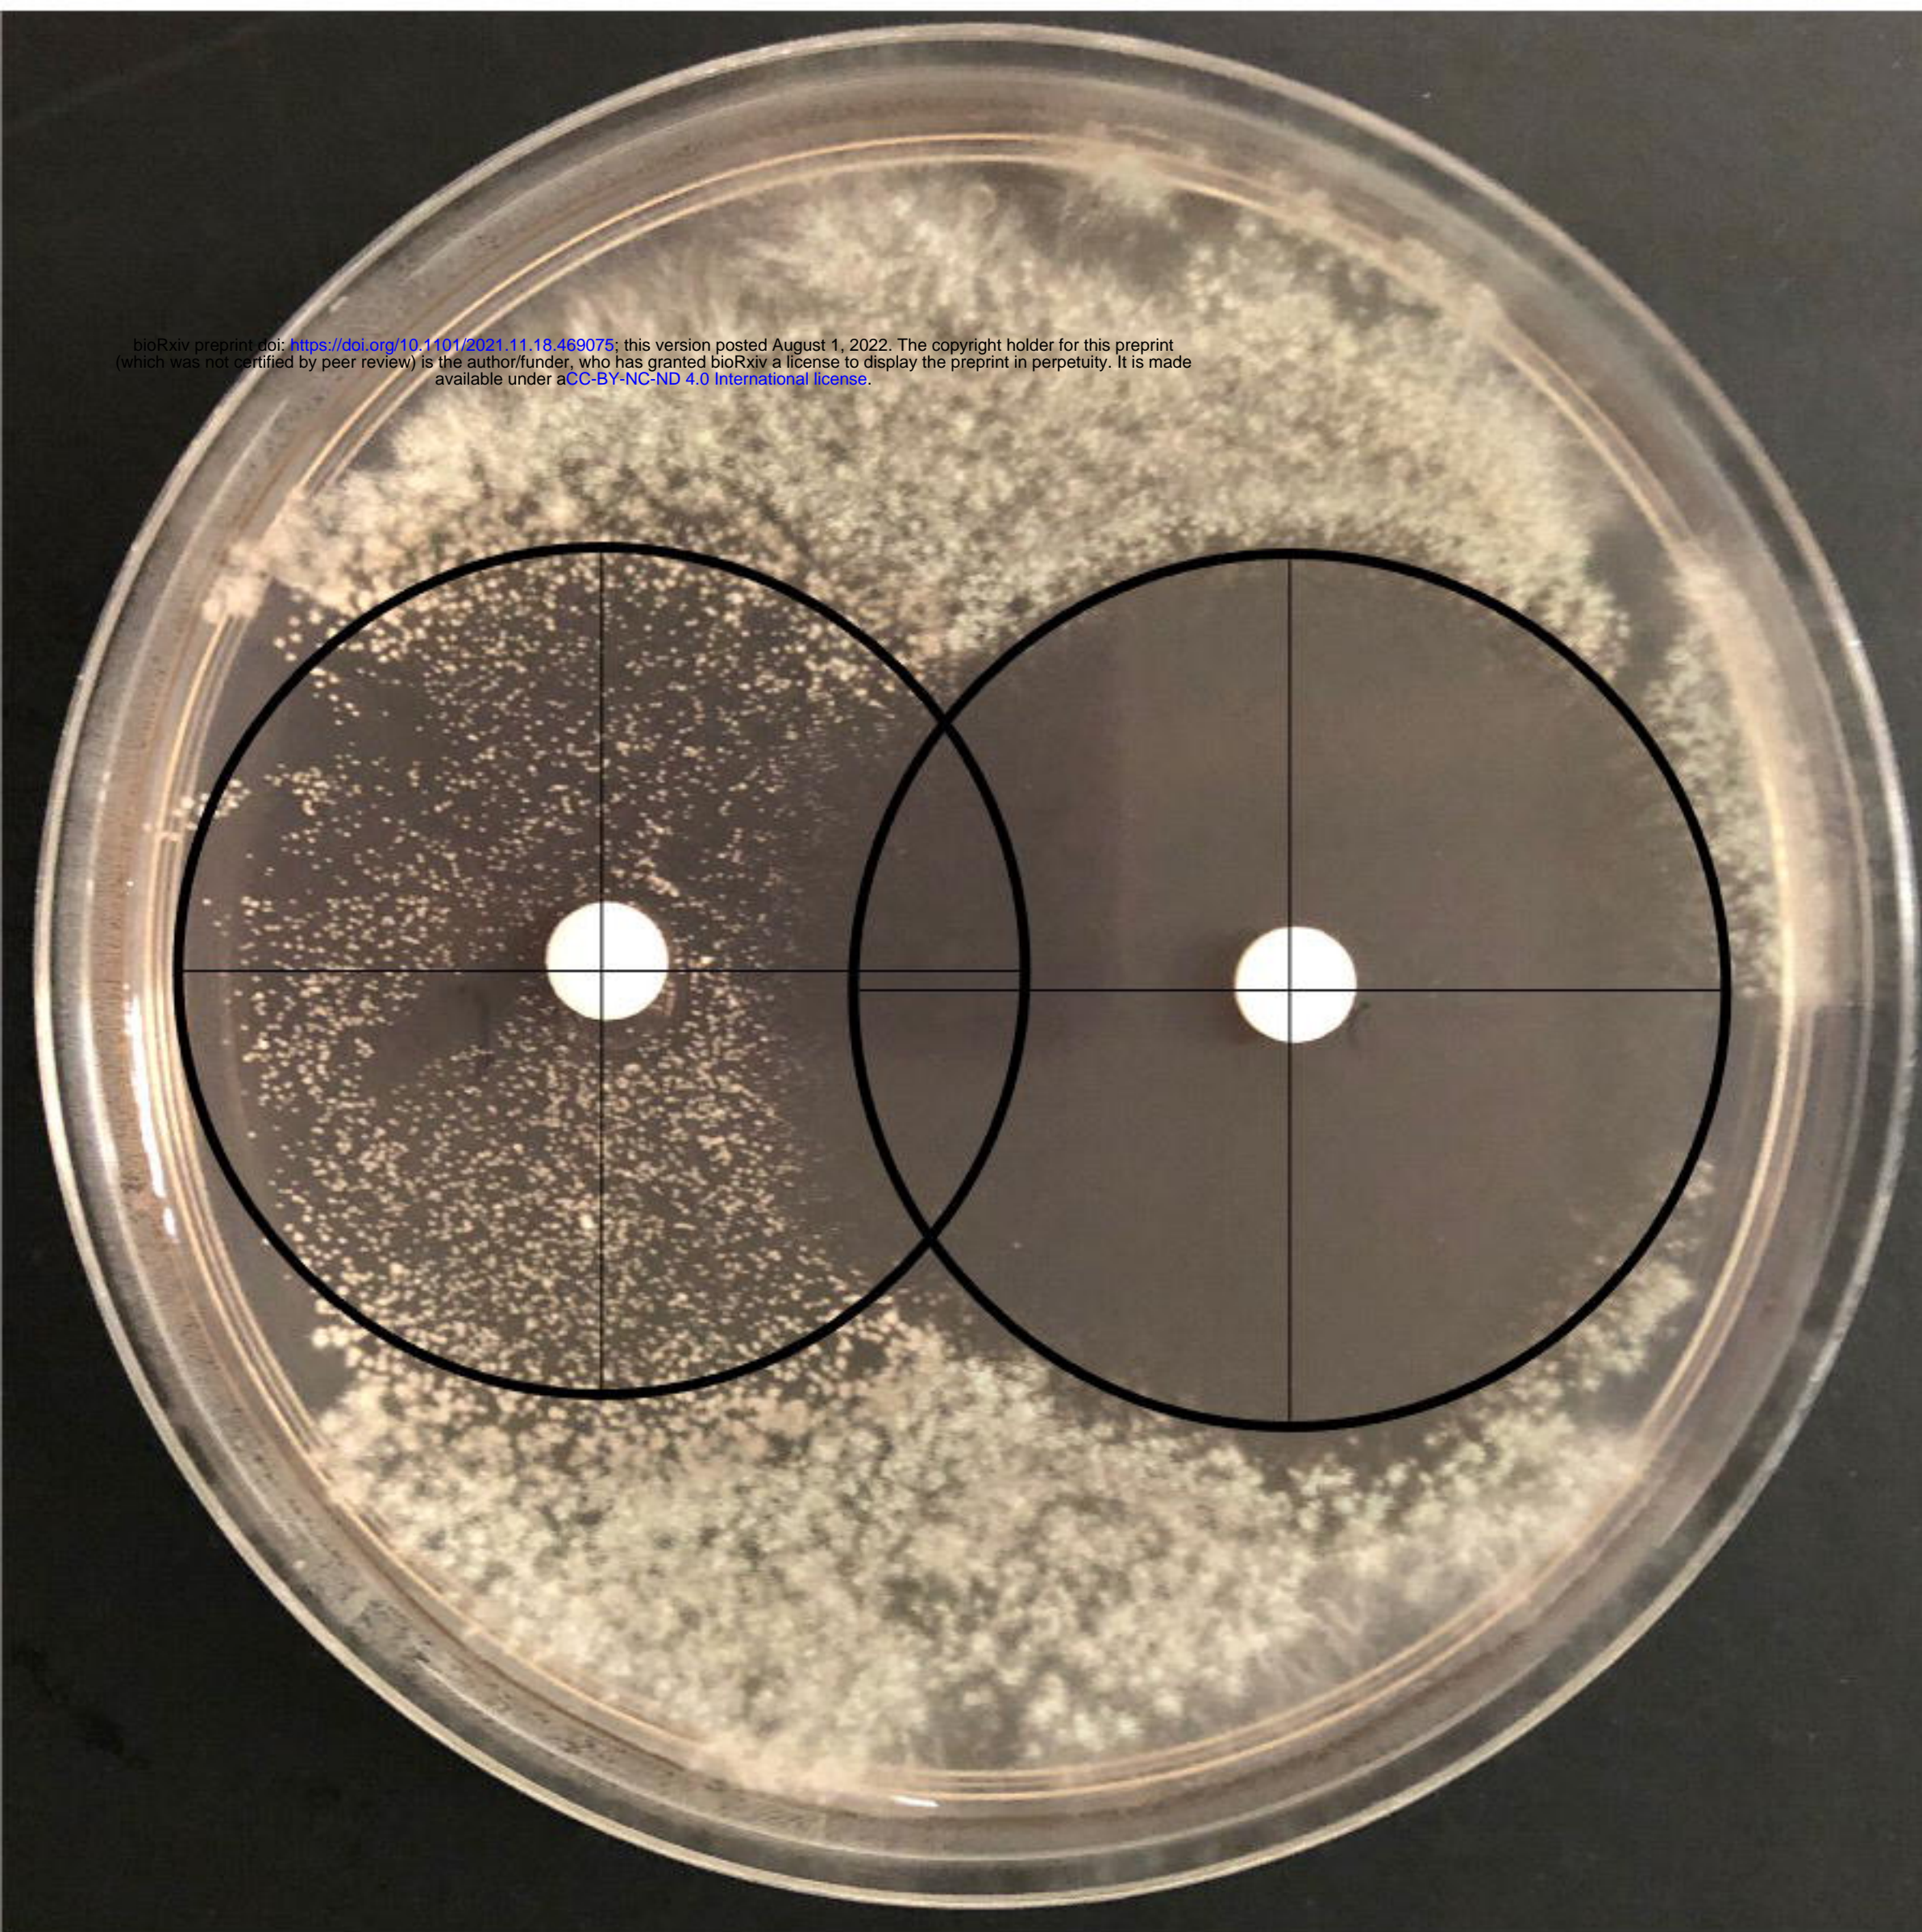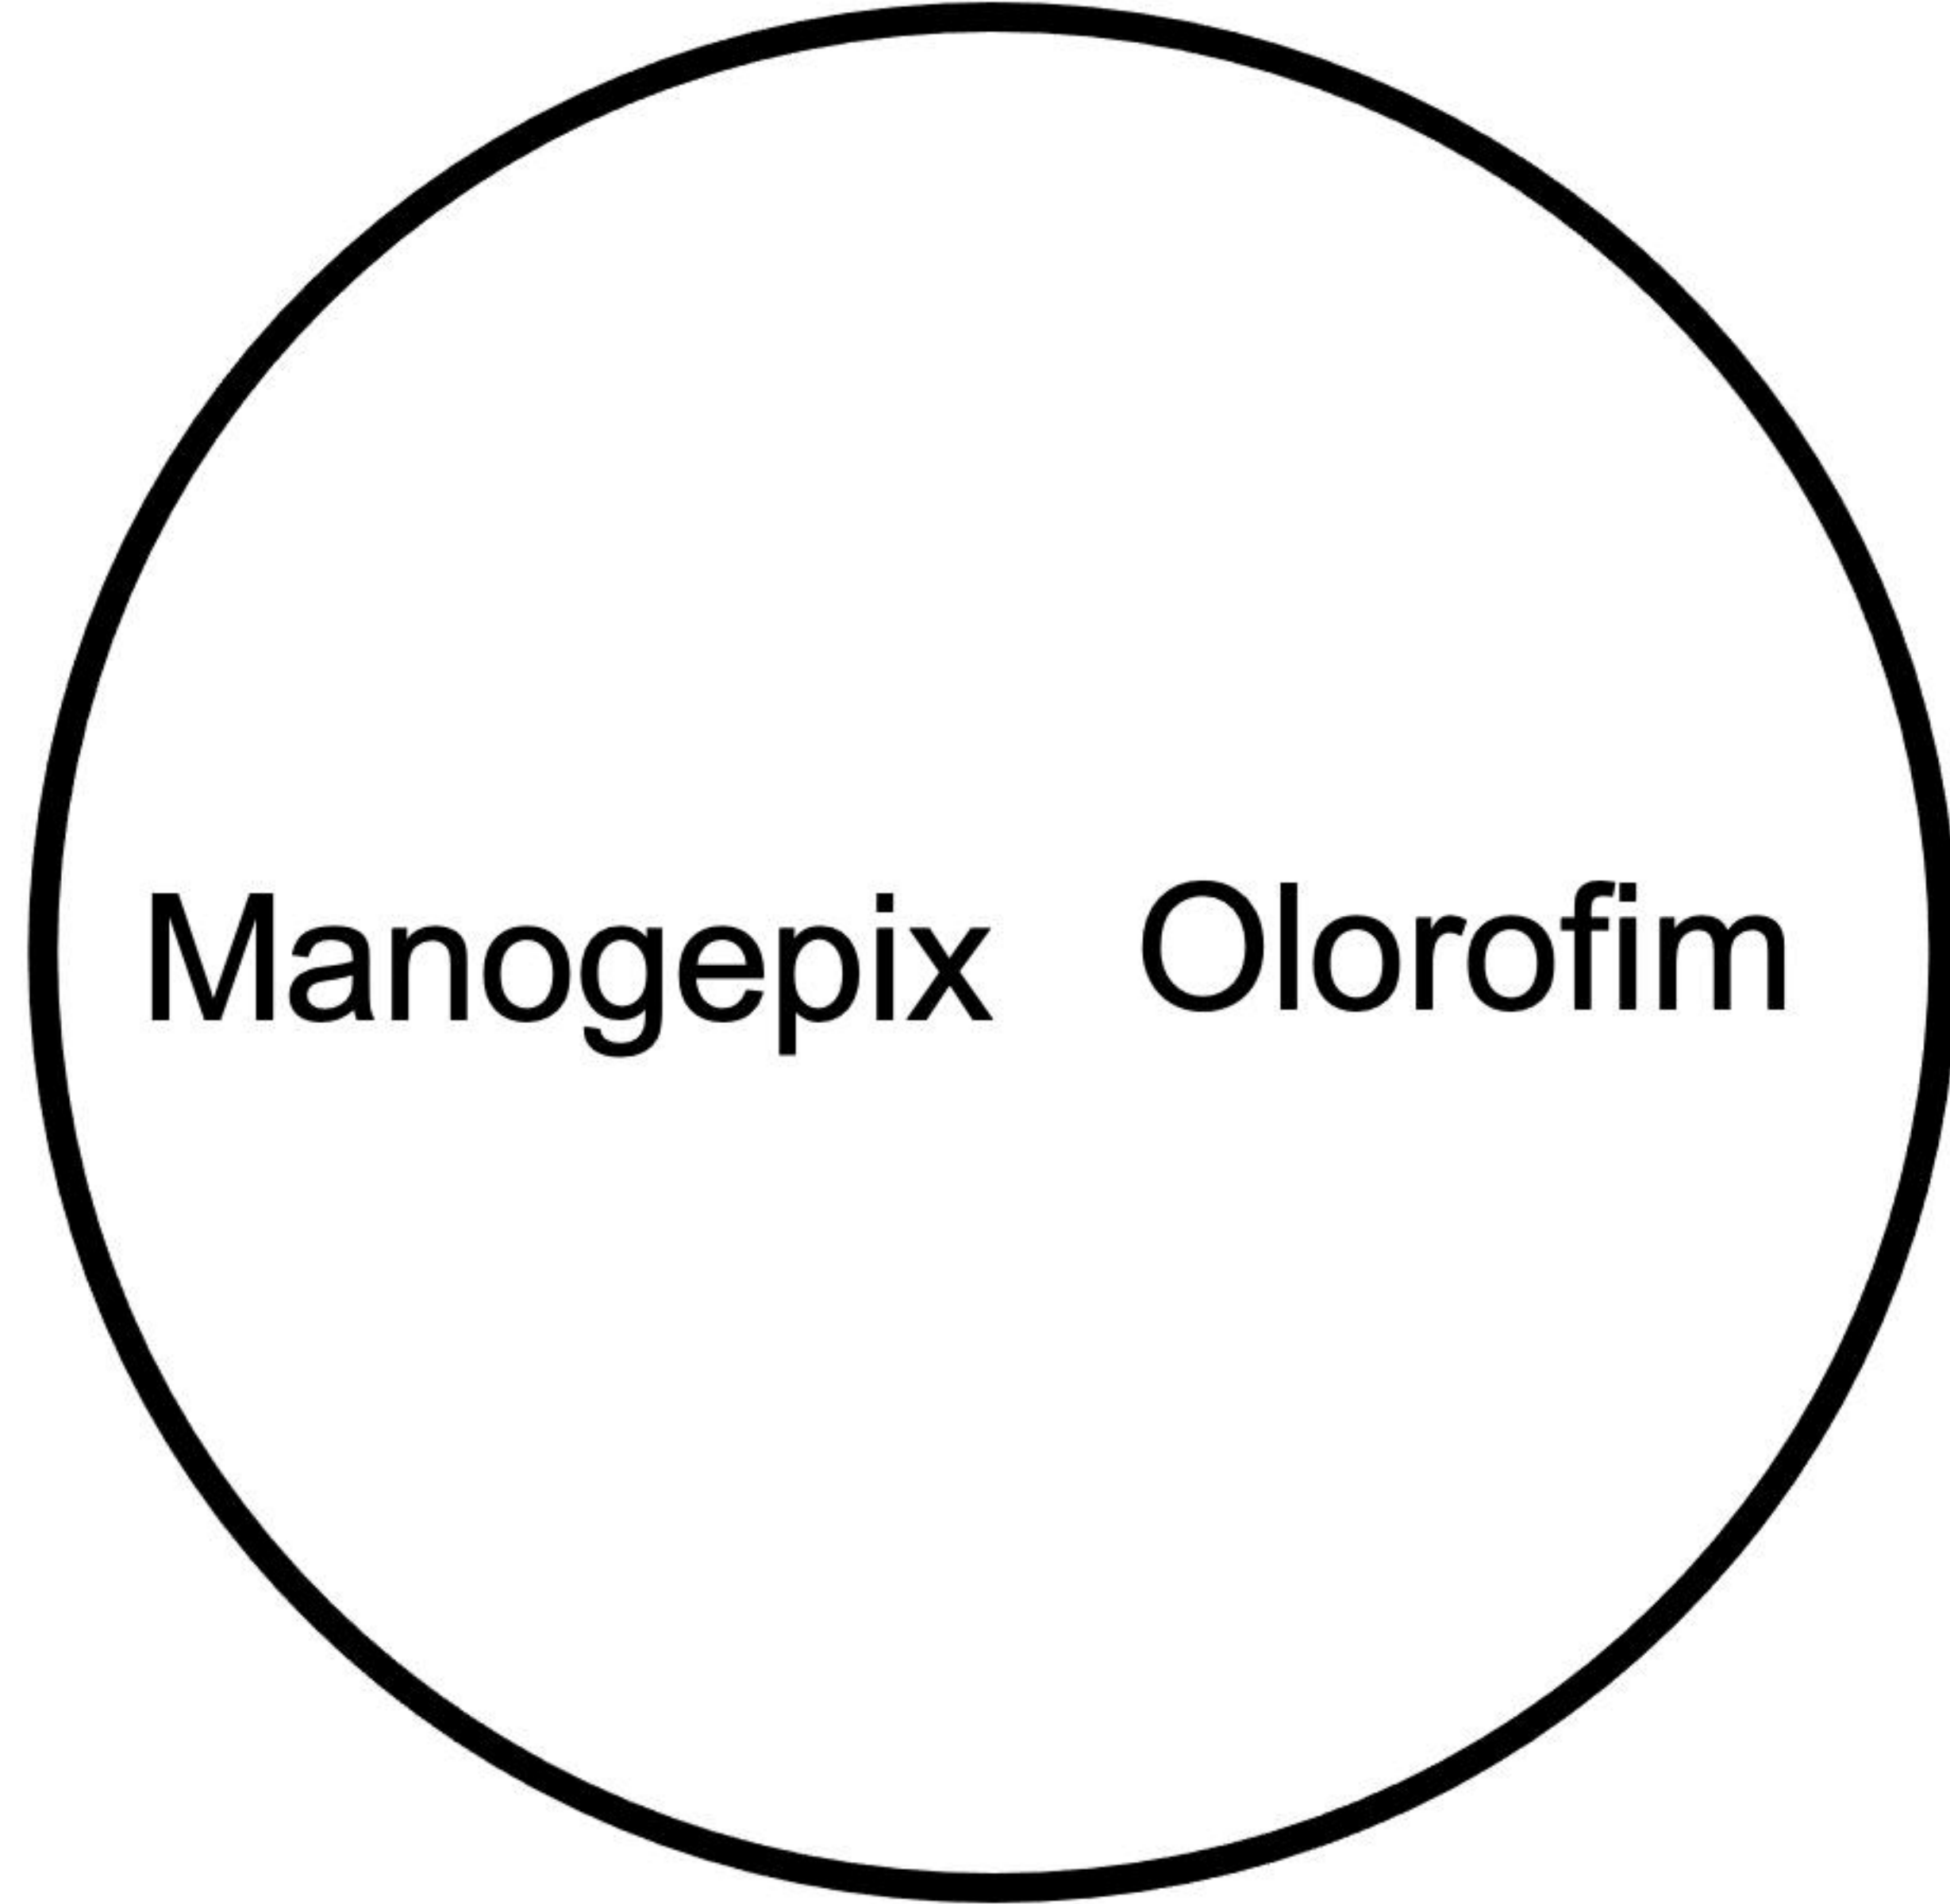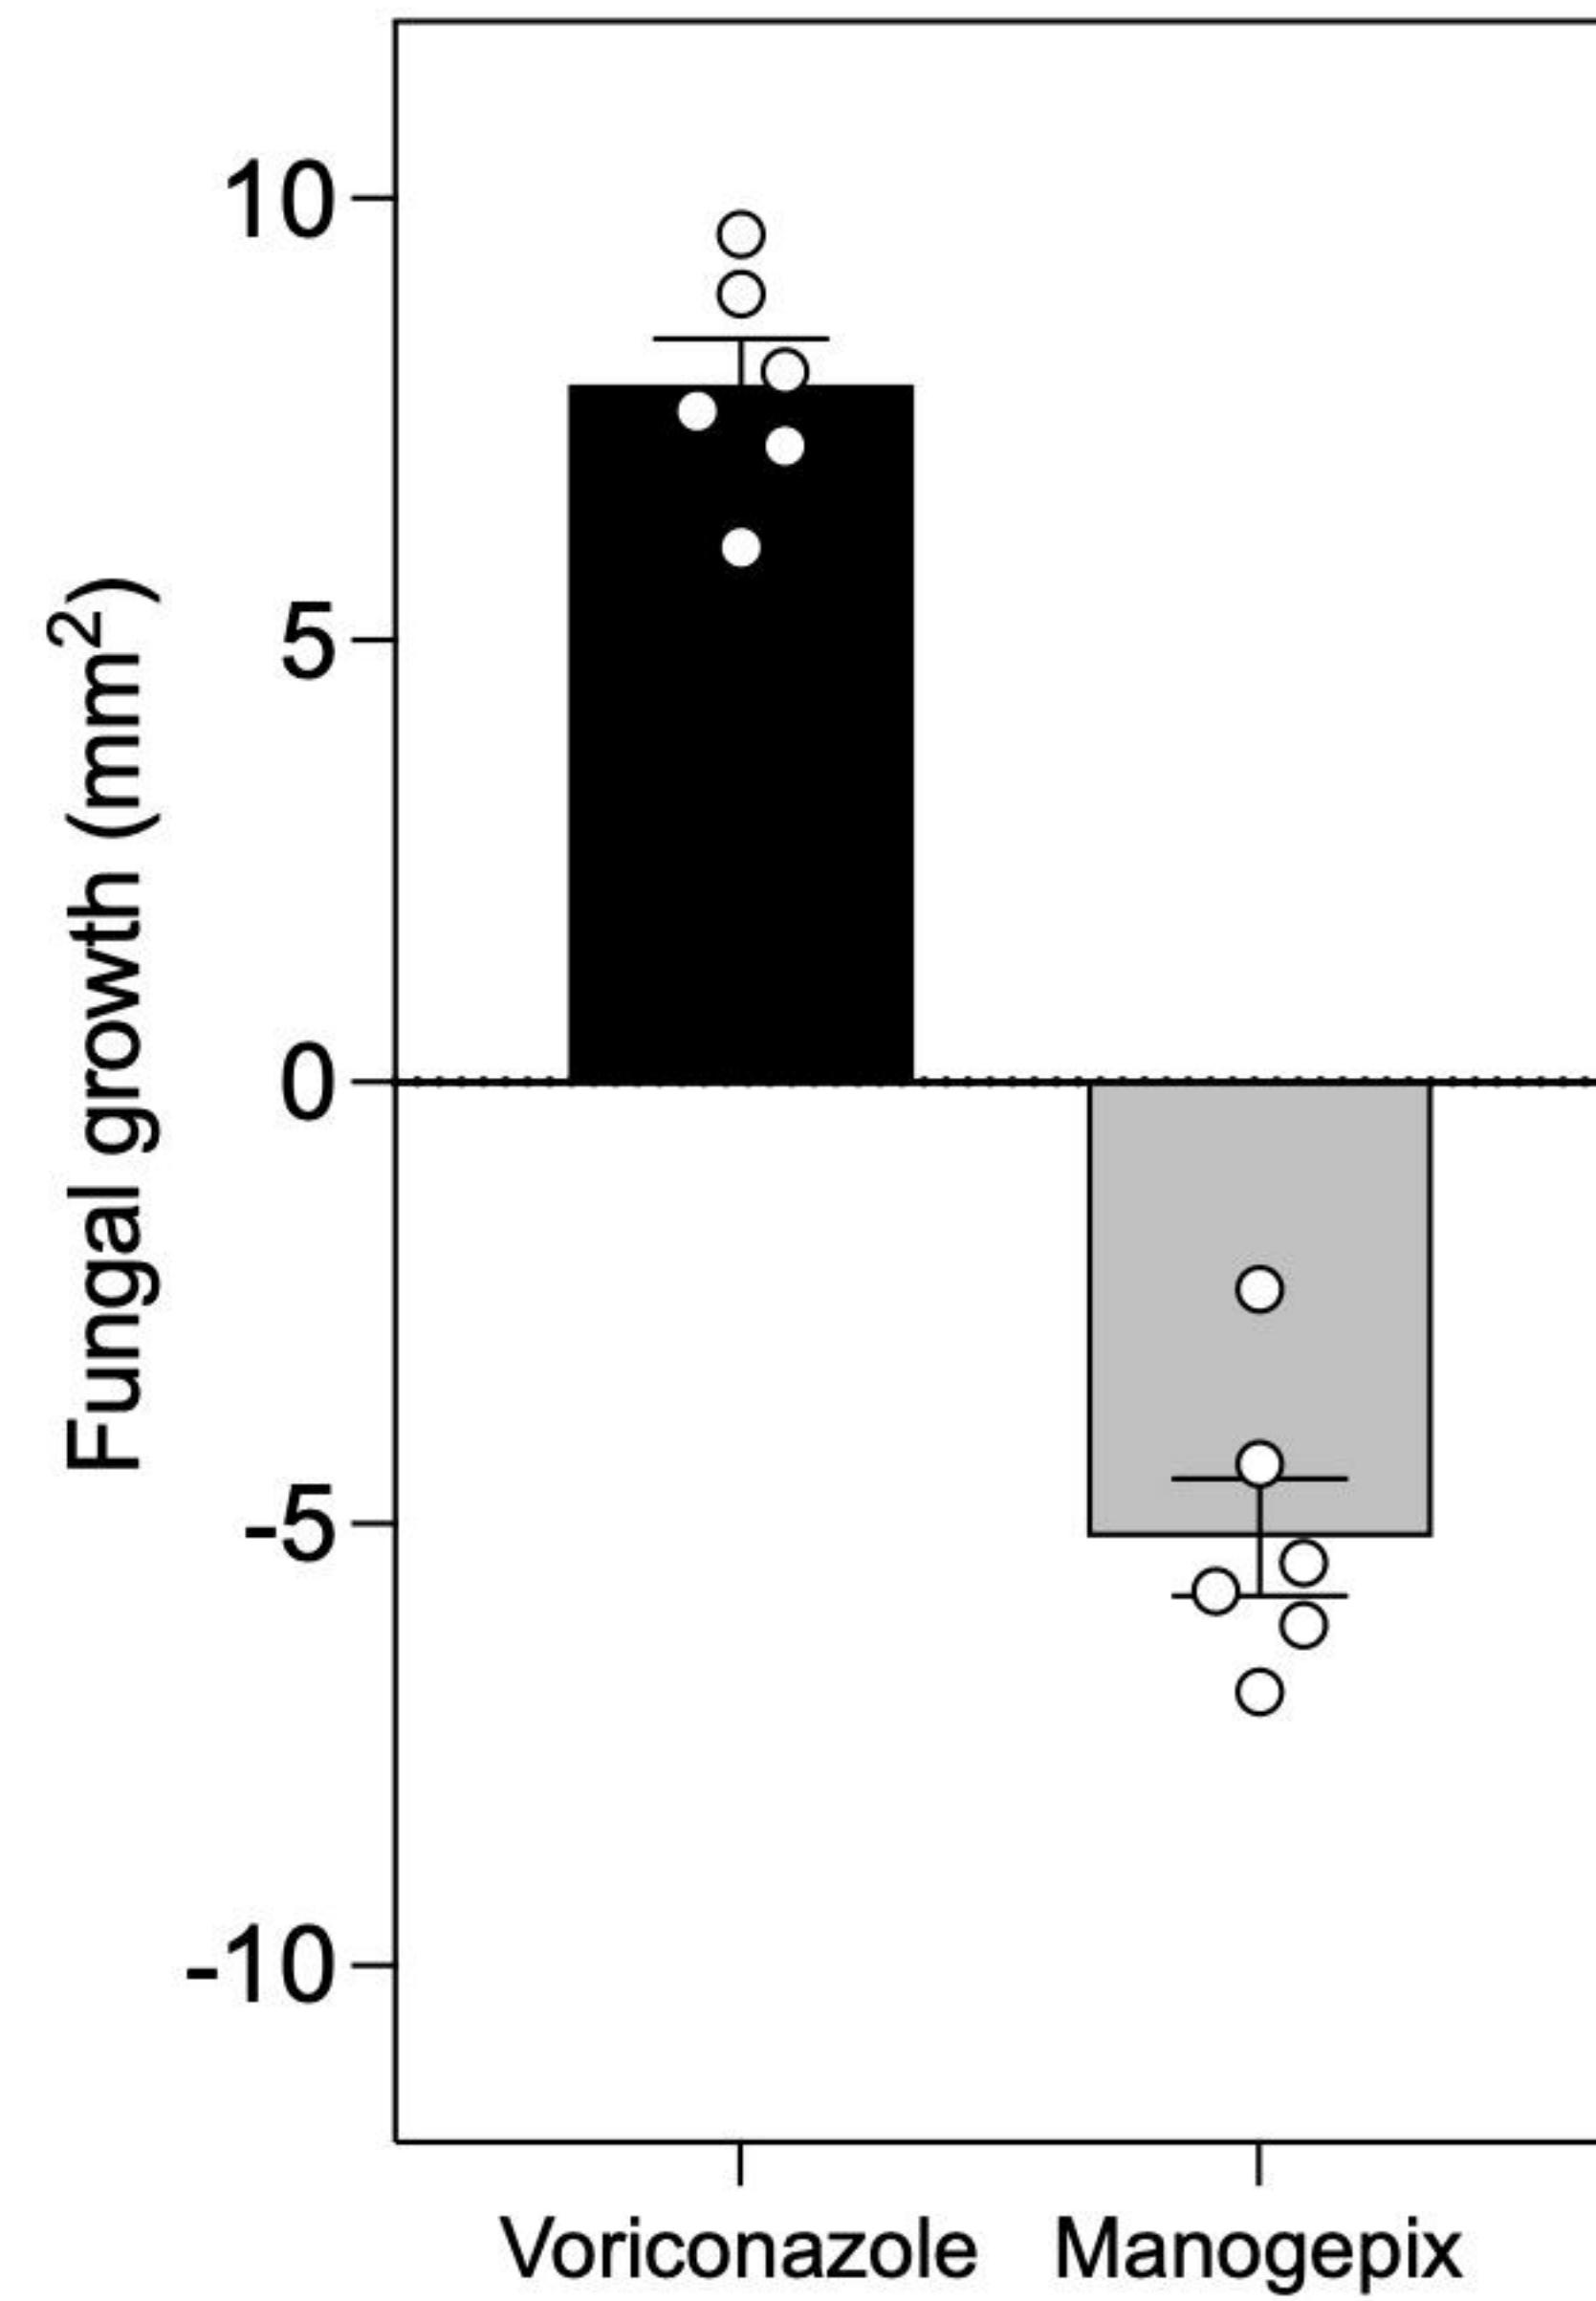



AMM +  
sodium nitrate

AMM +  
L-glutamine

AMM +  
urea

AMM +  
L-proline

MFIG001

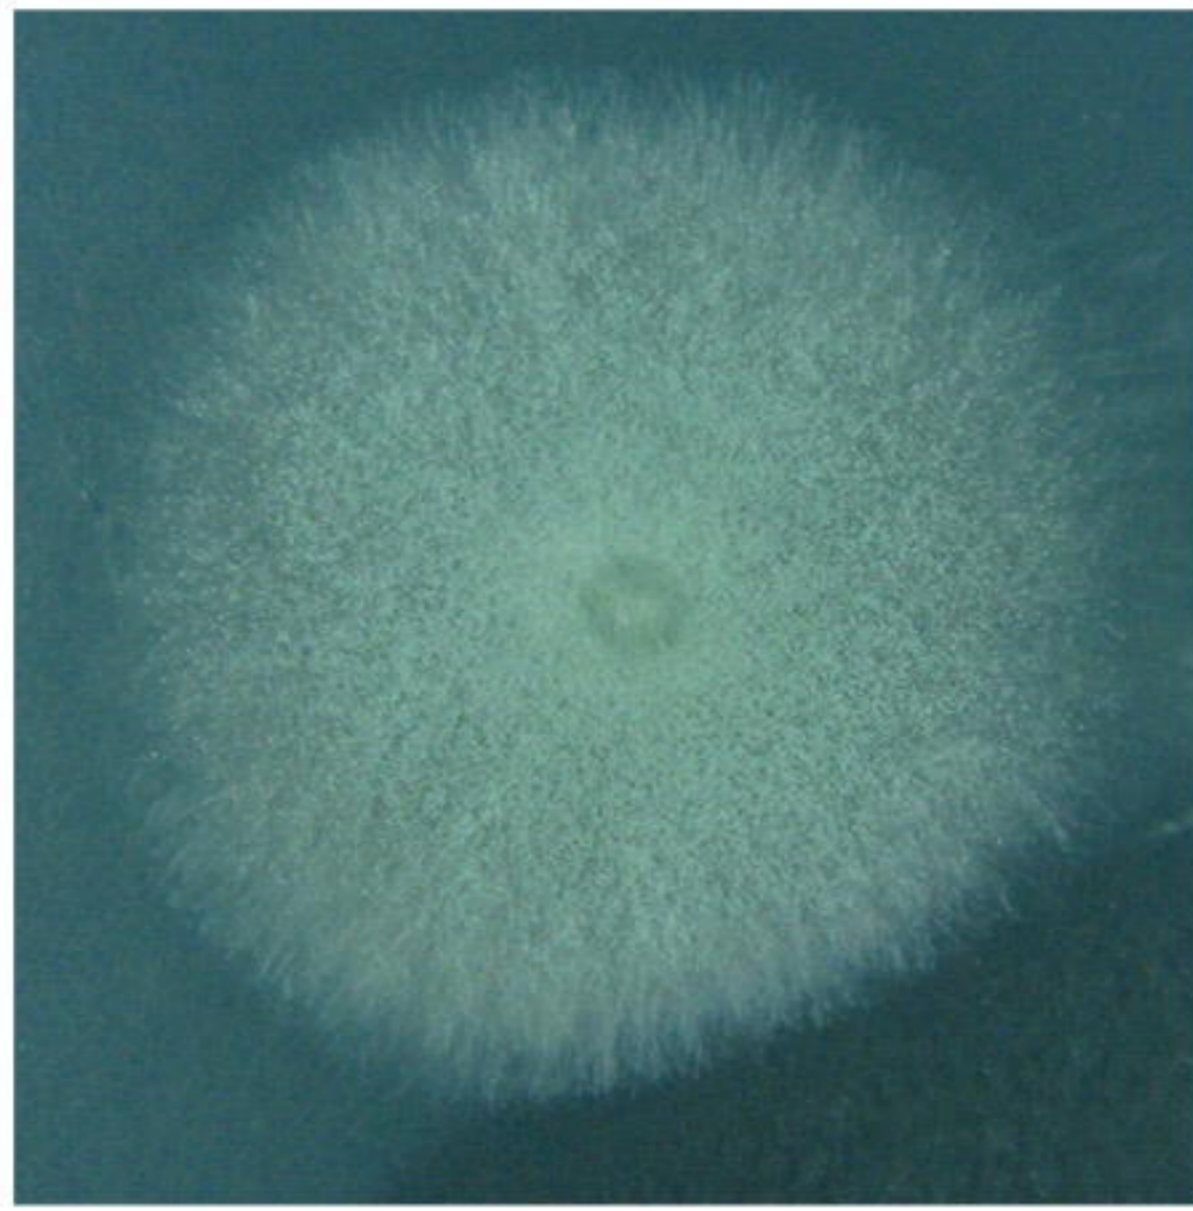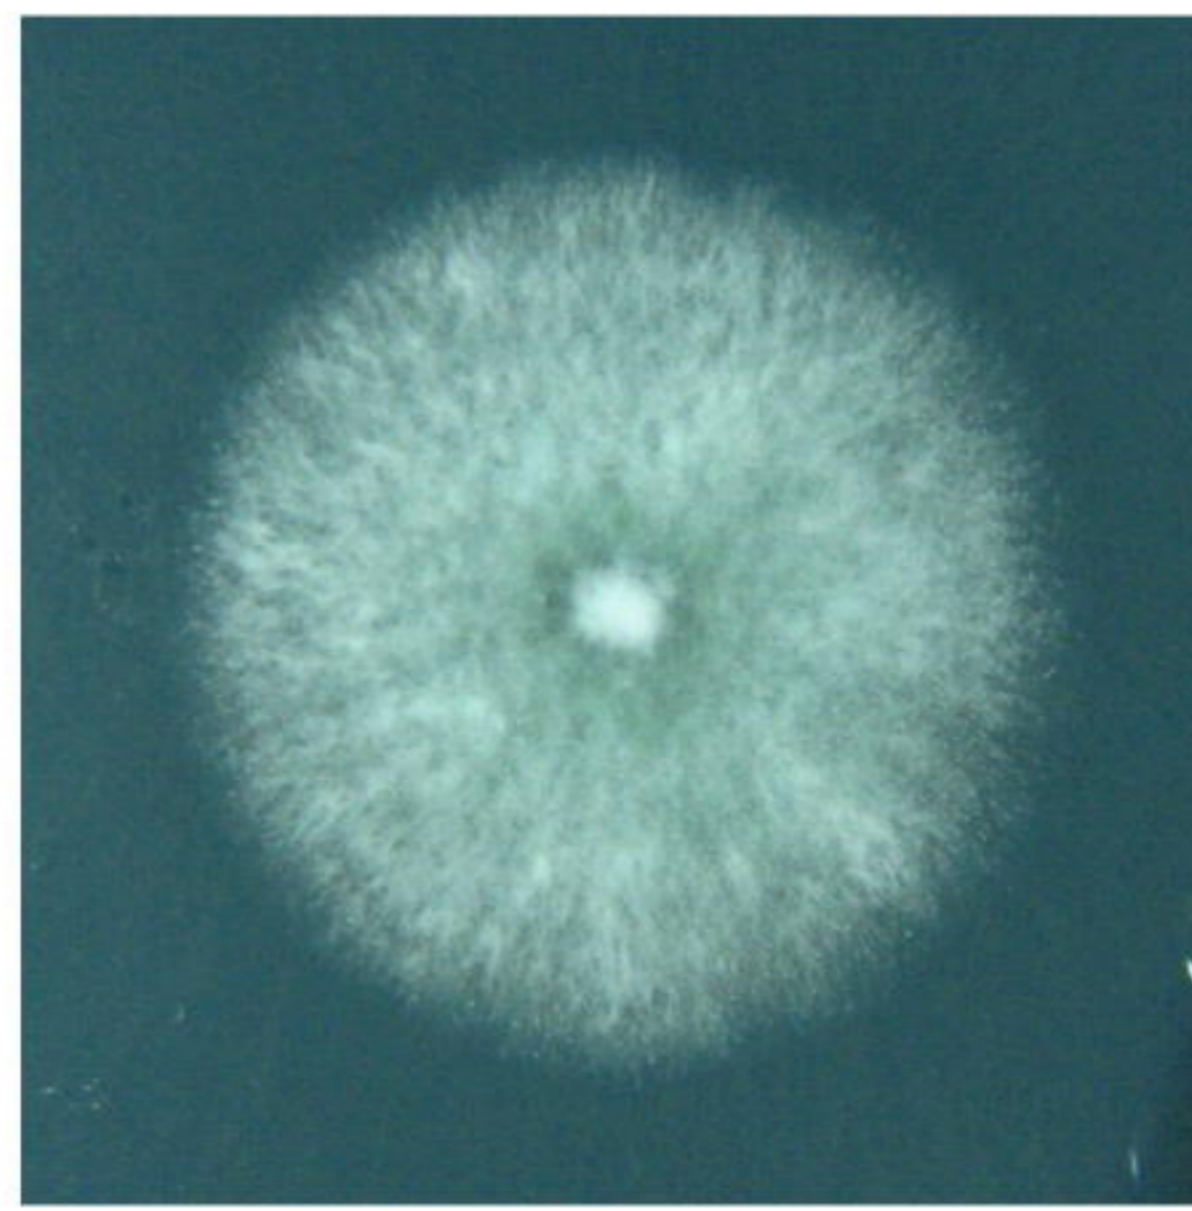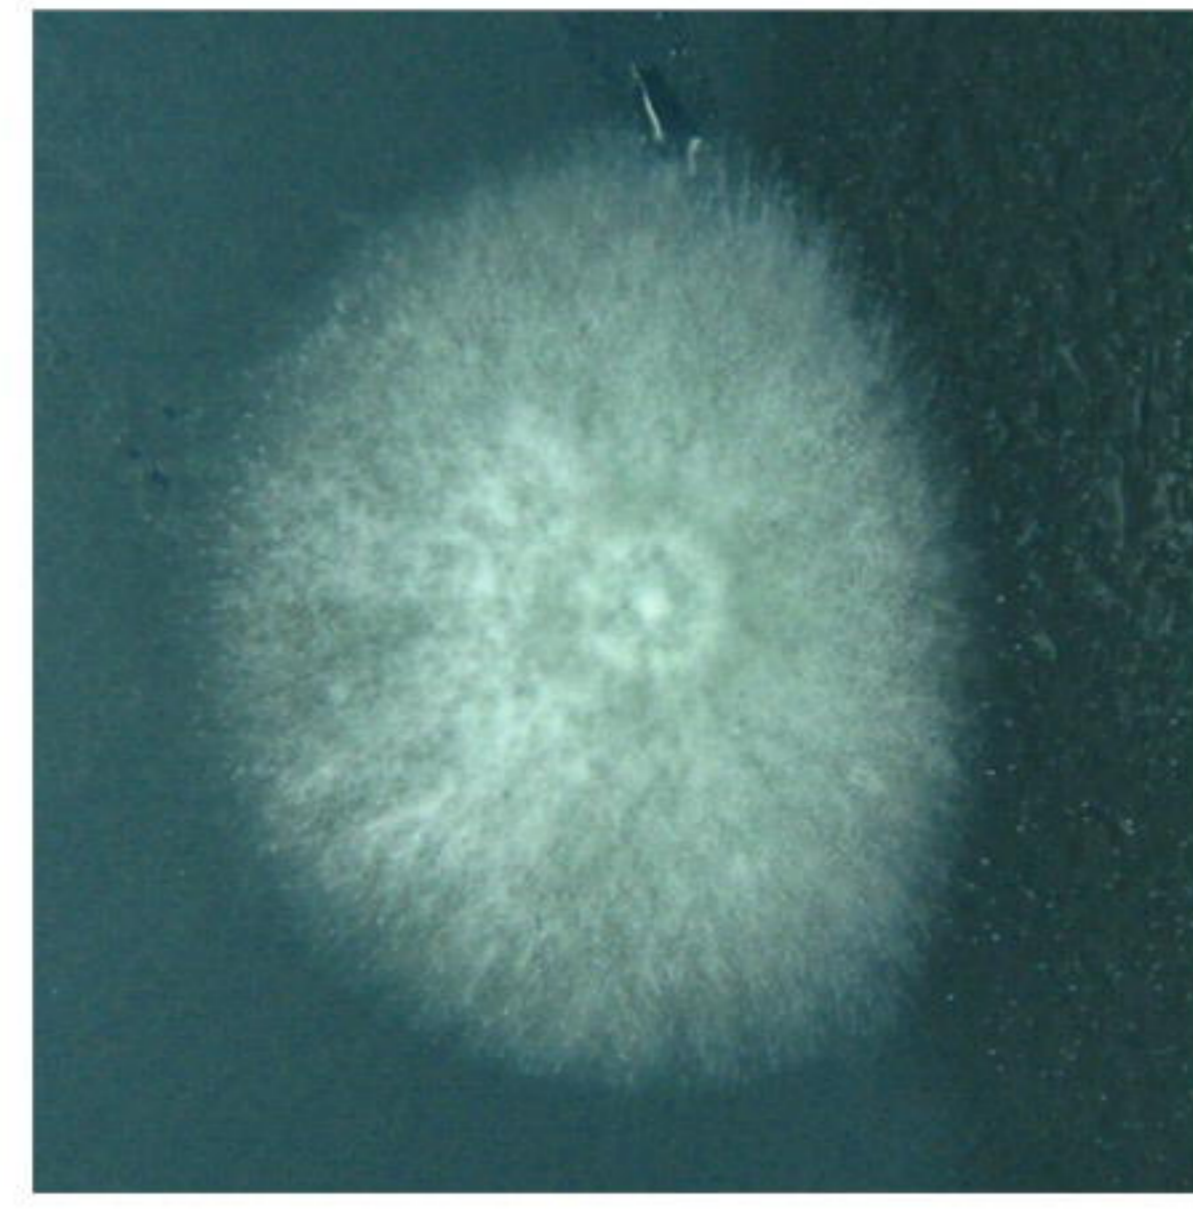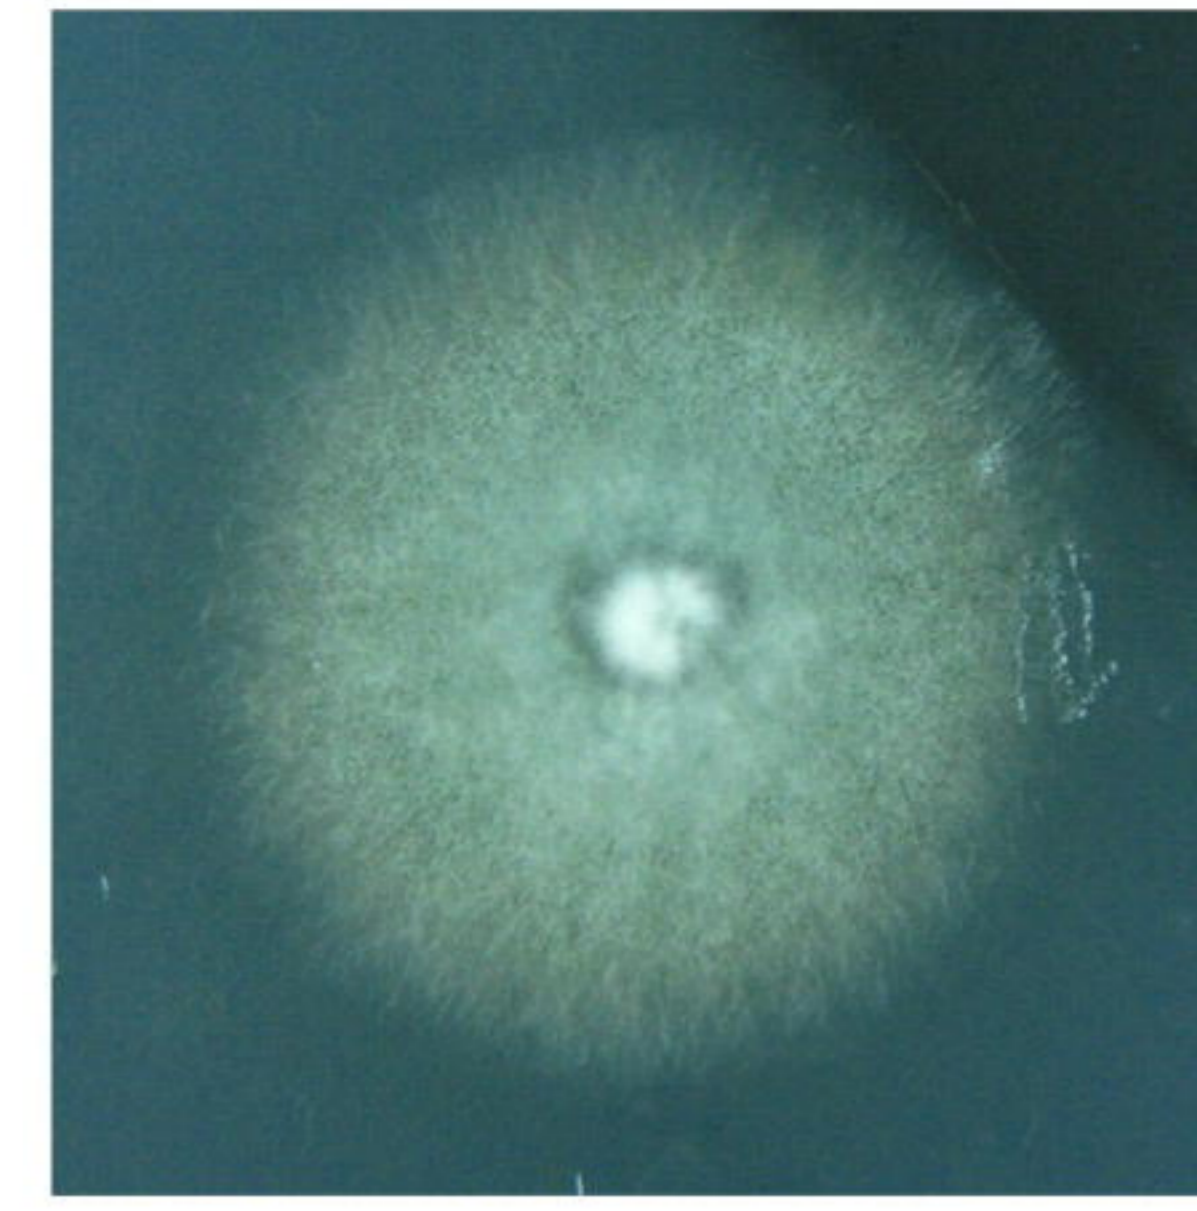

$\Delta hapB$

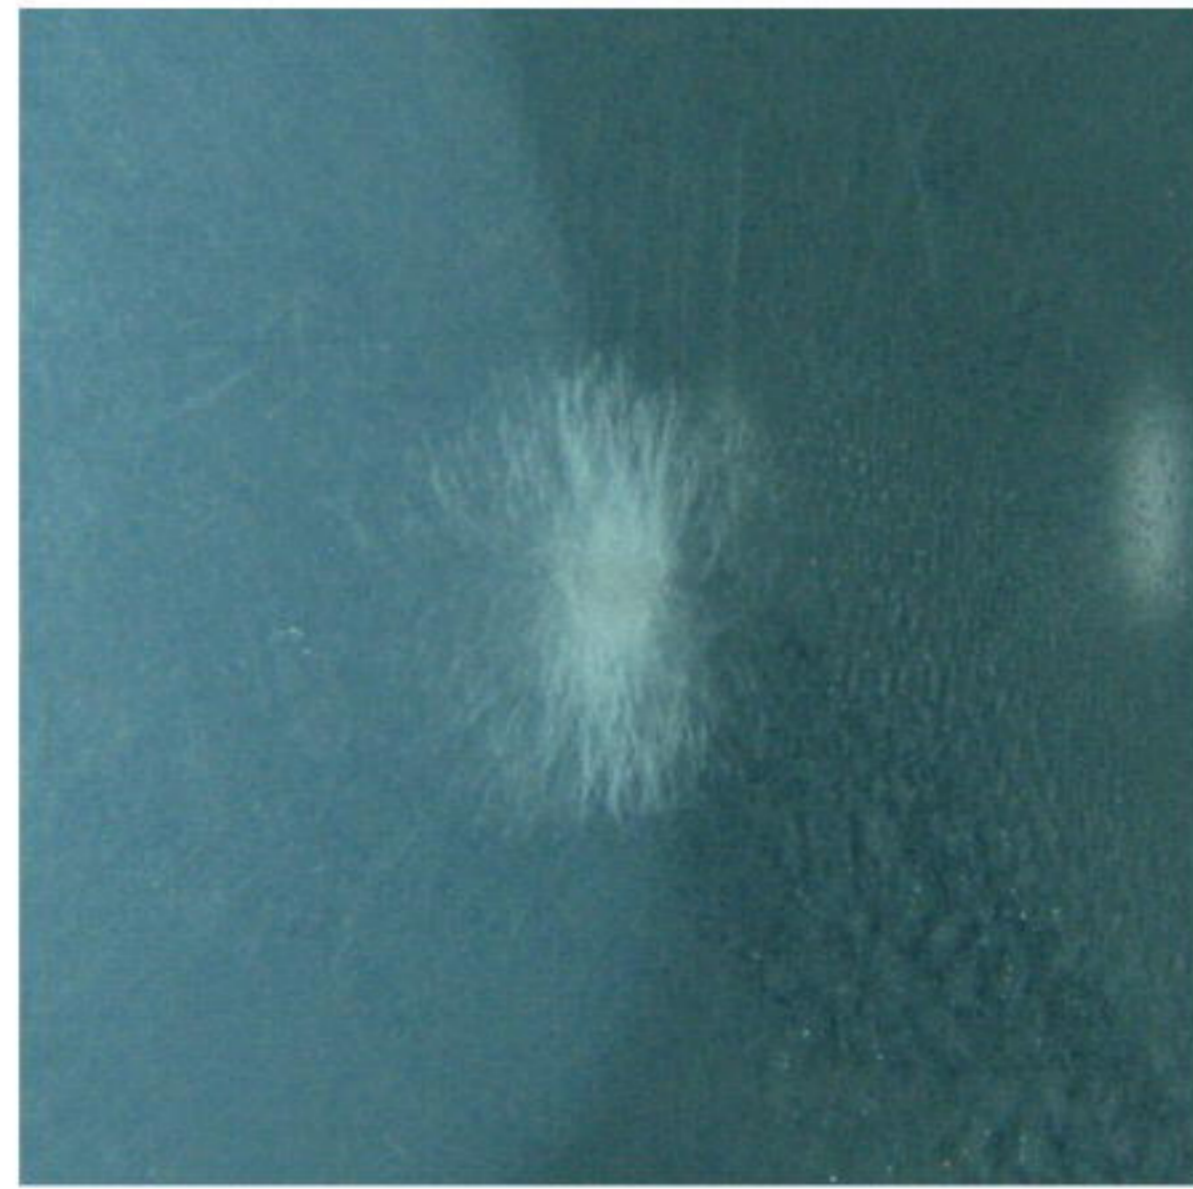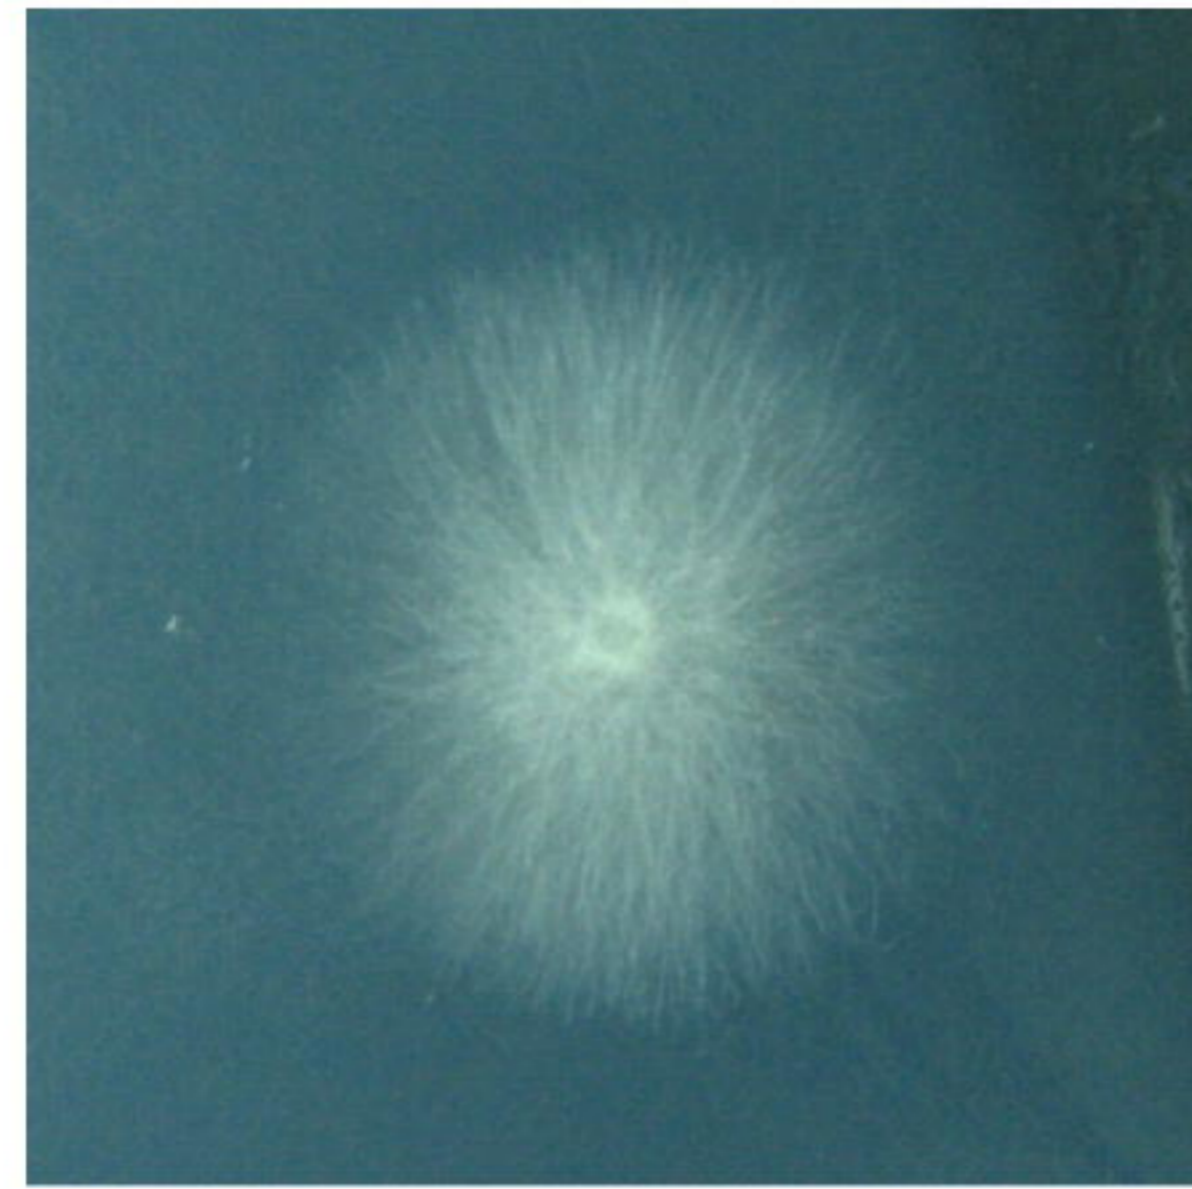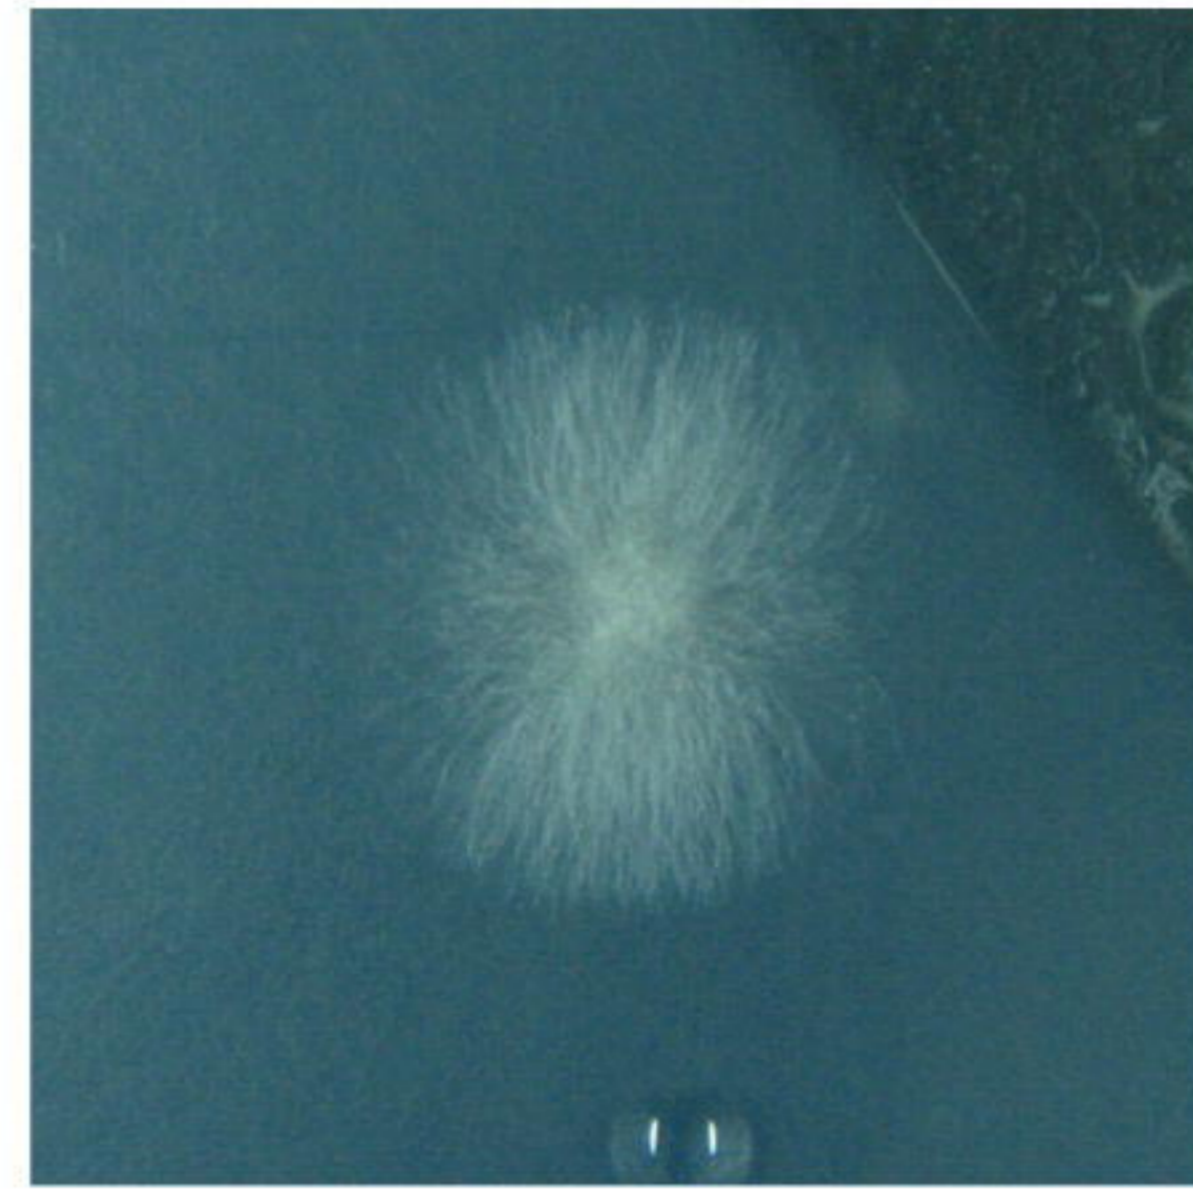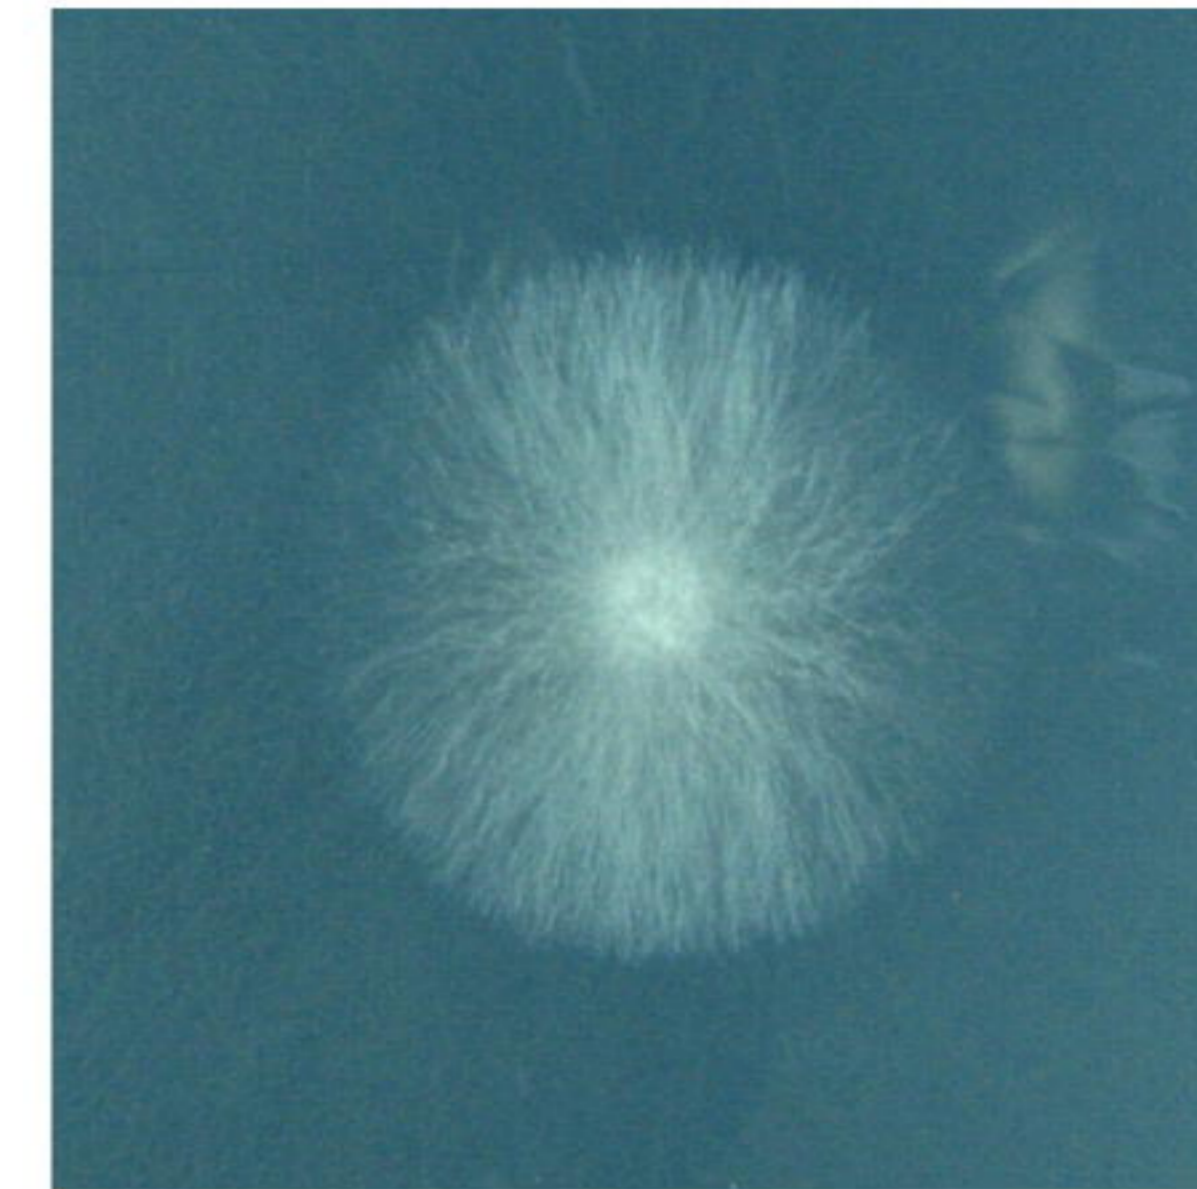

$\Delta devR$

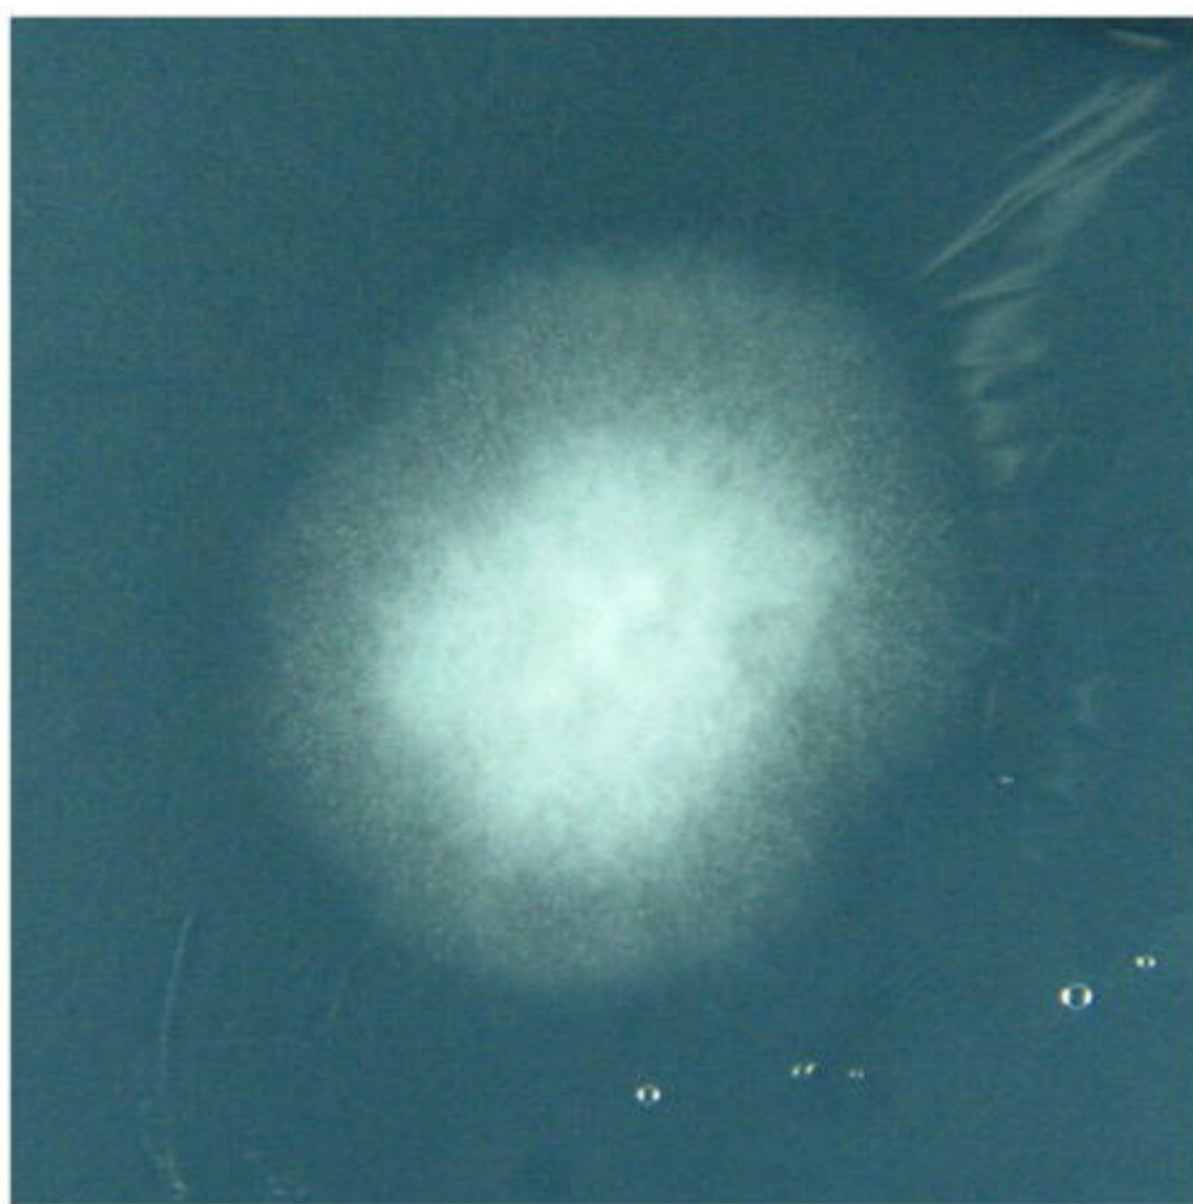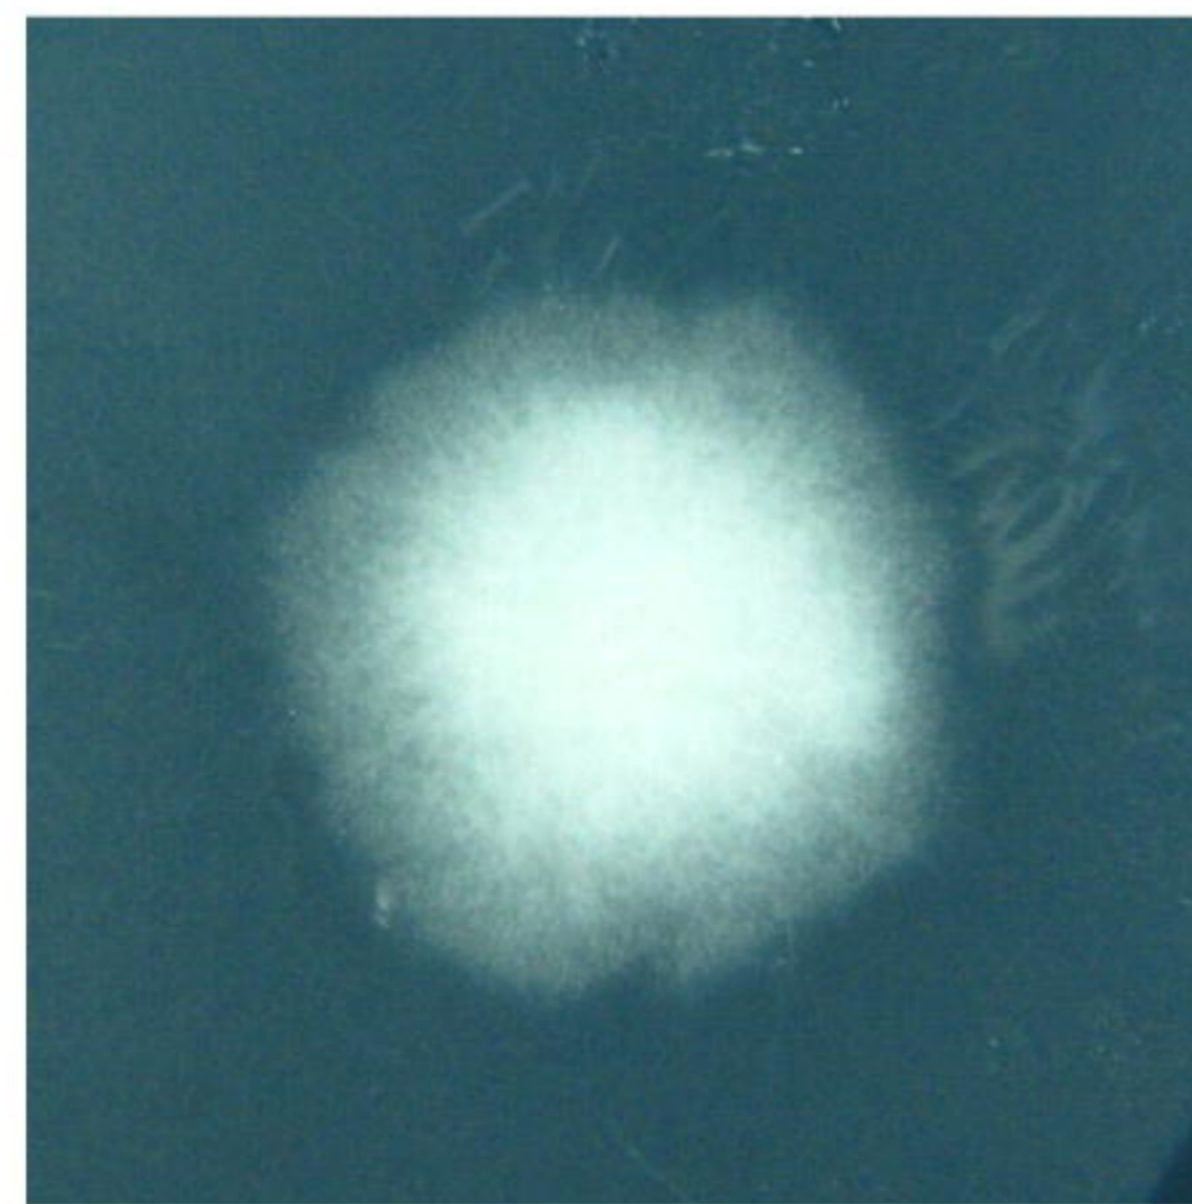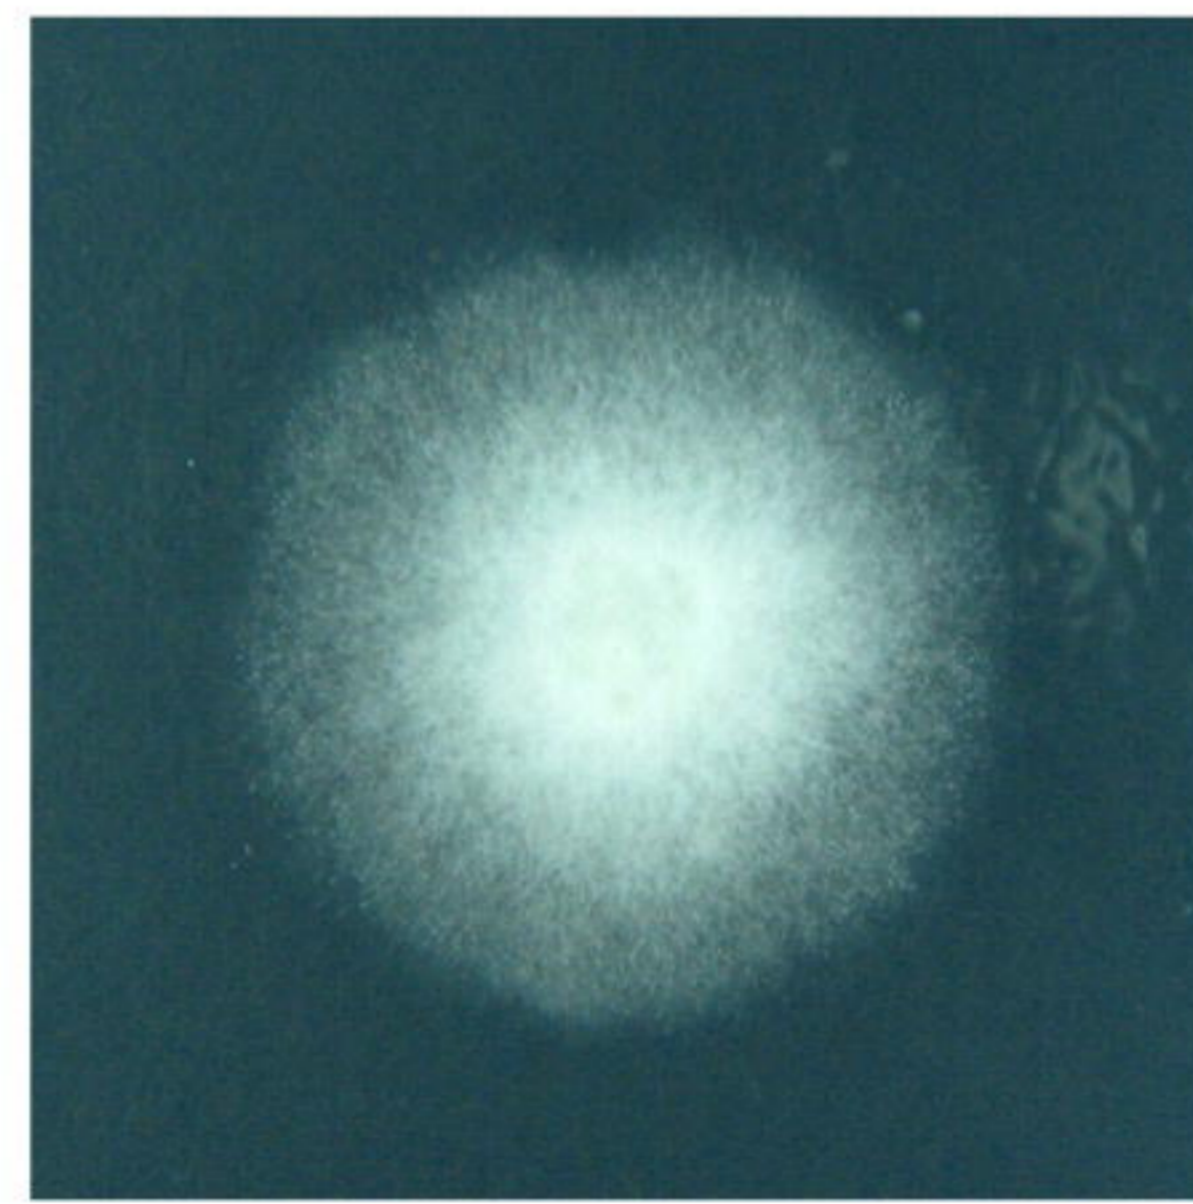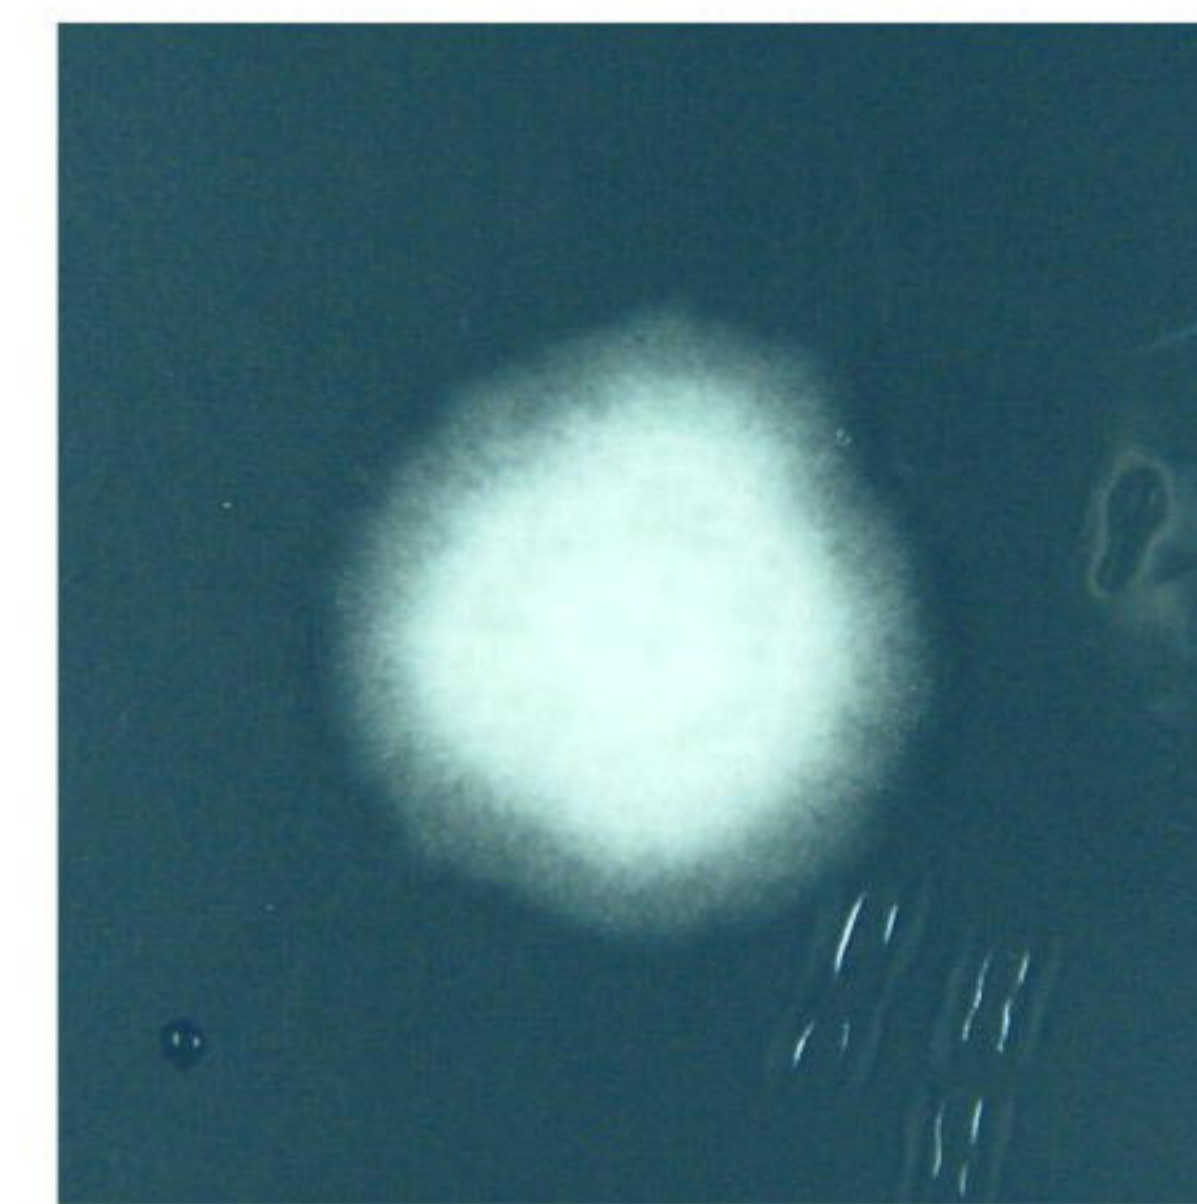

$\Delta acdX$

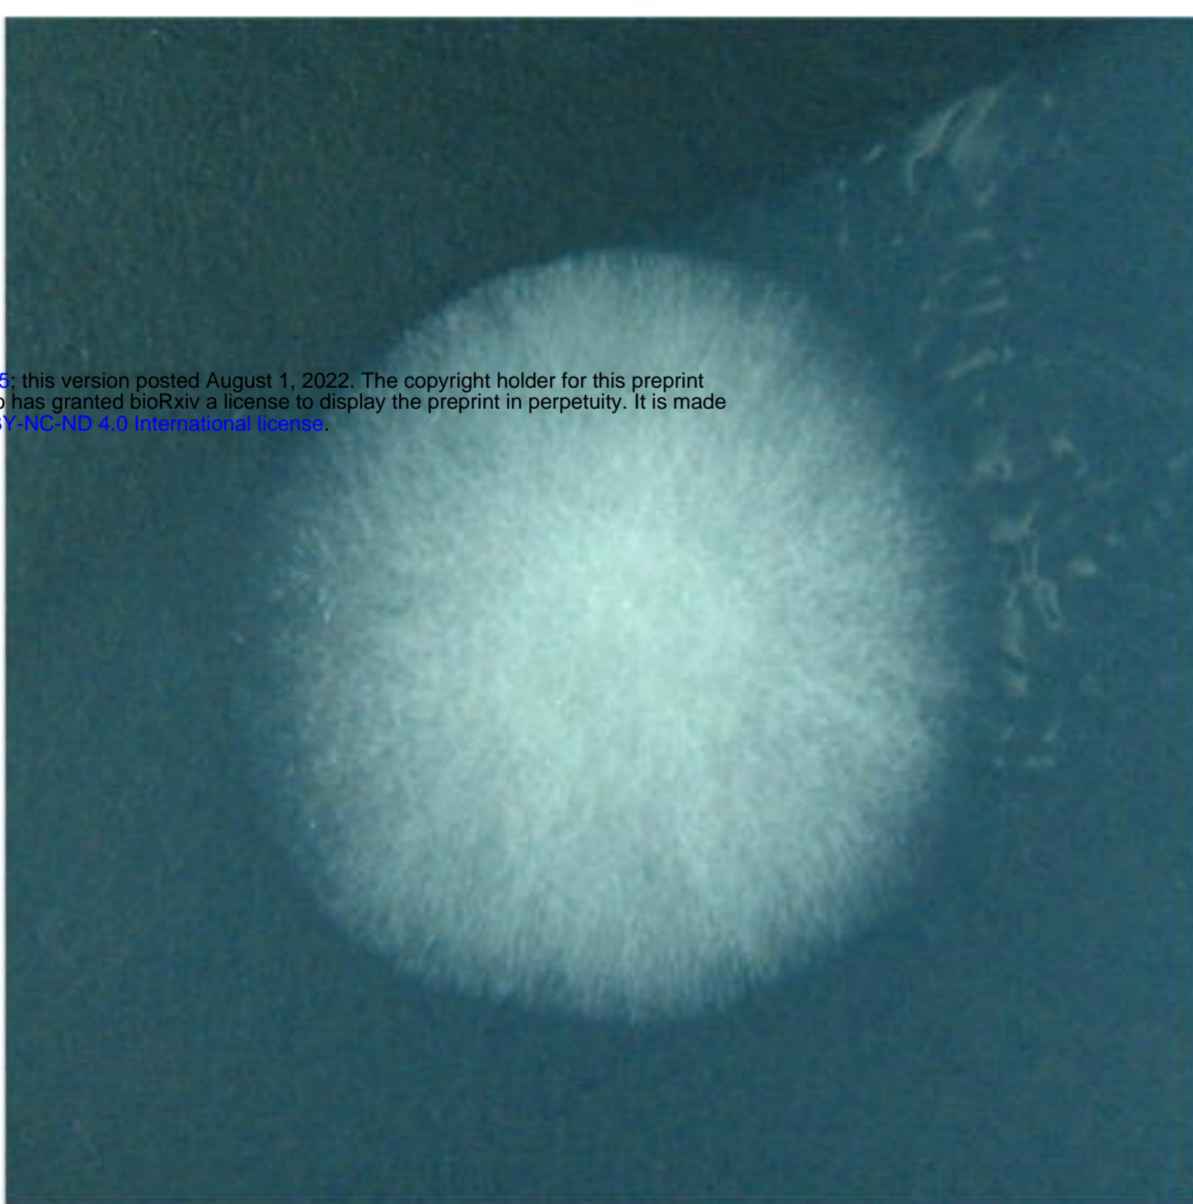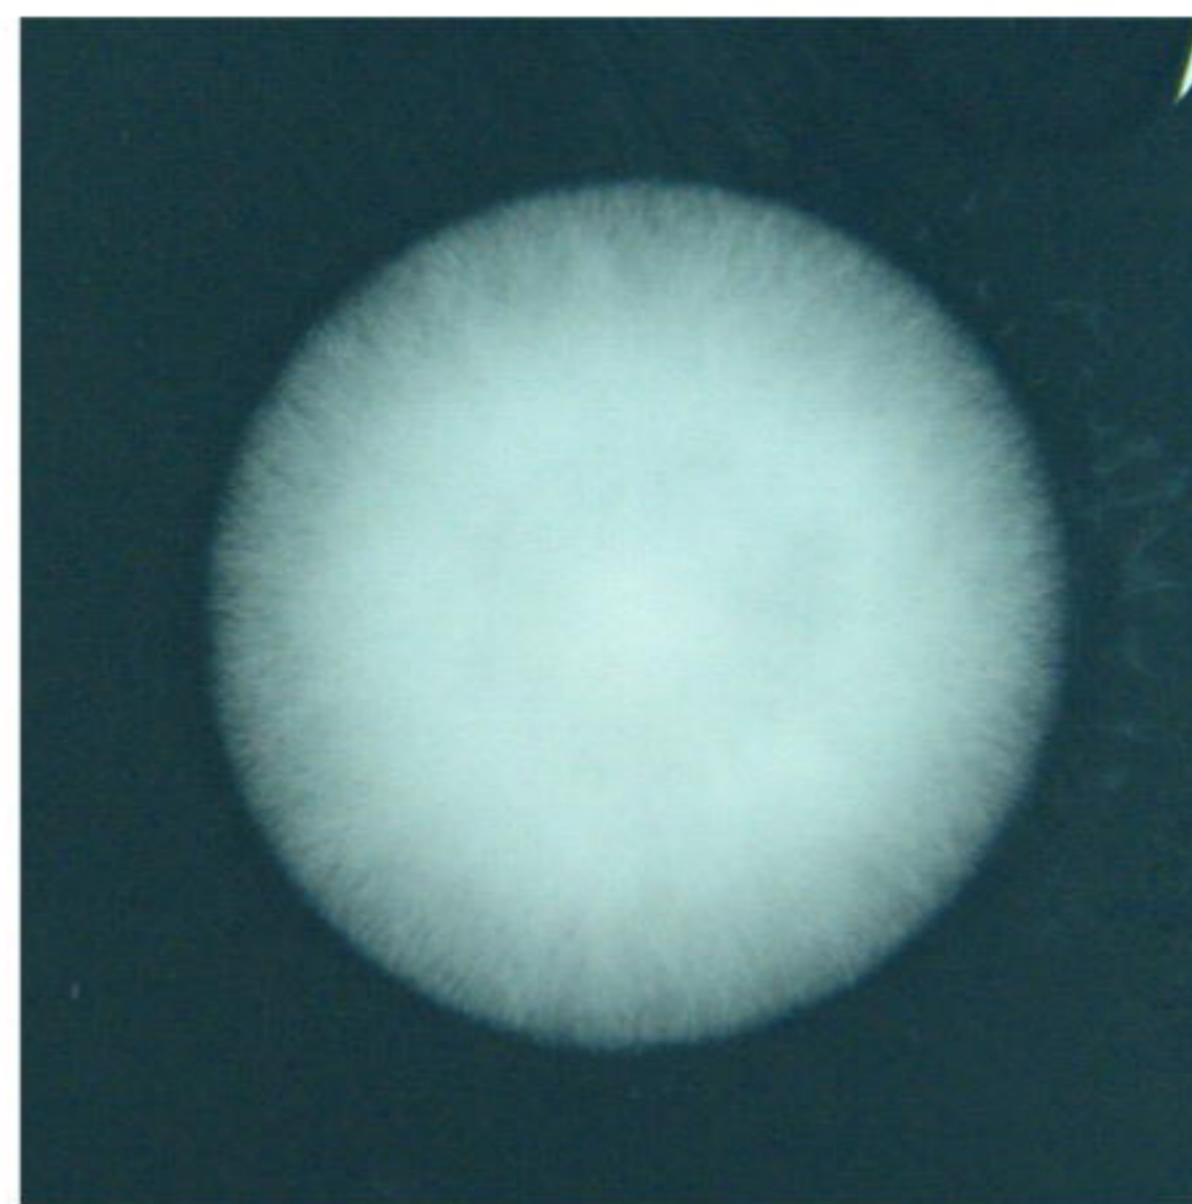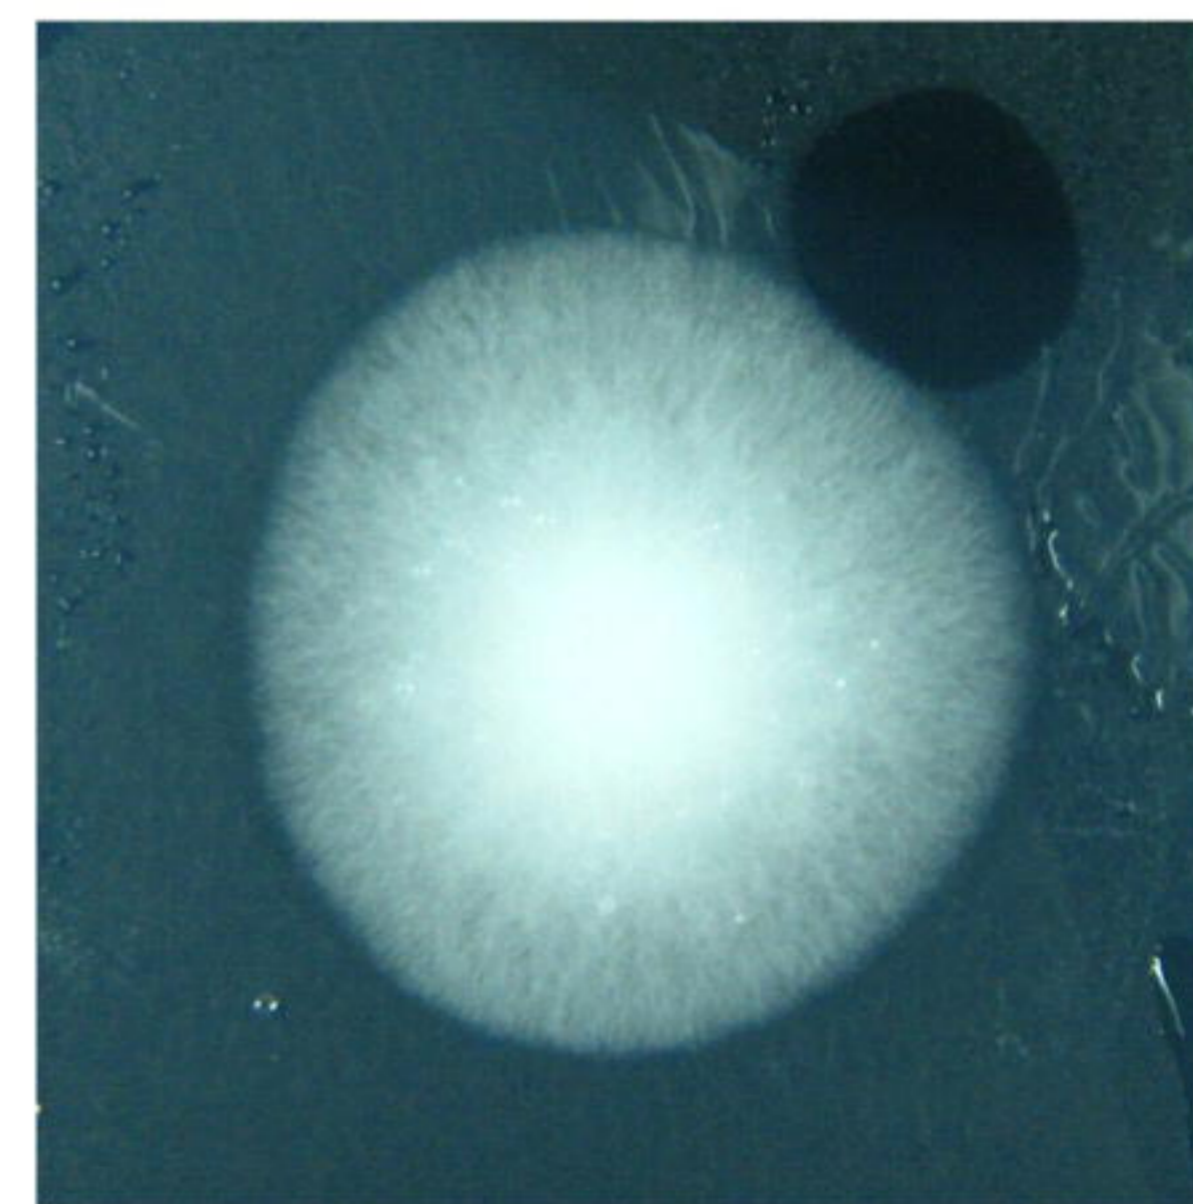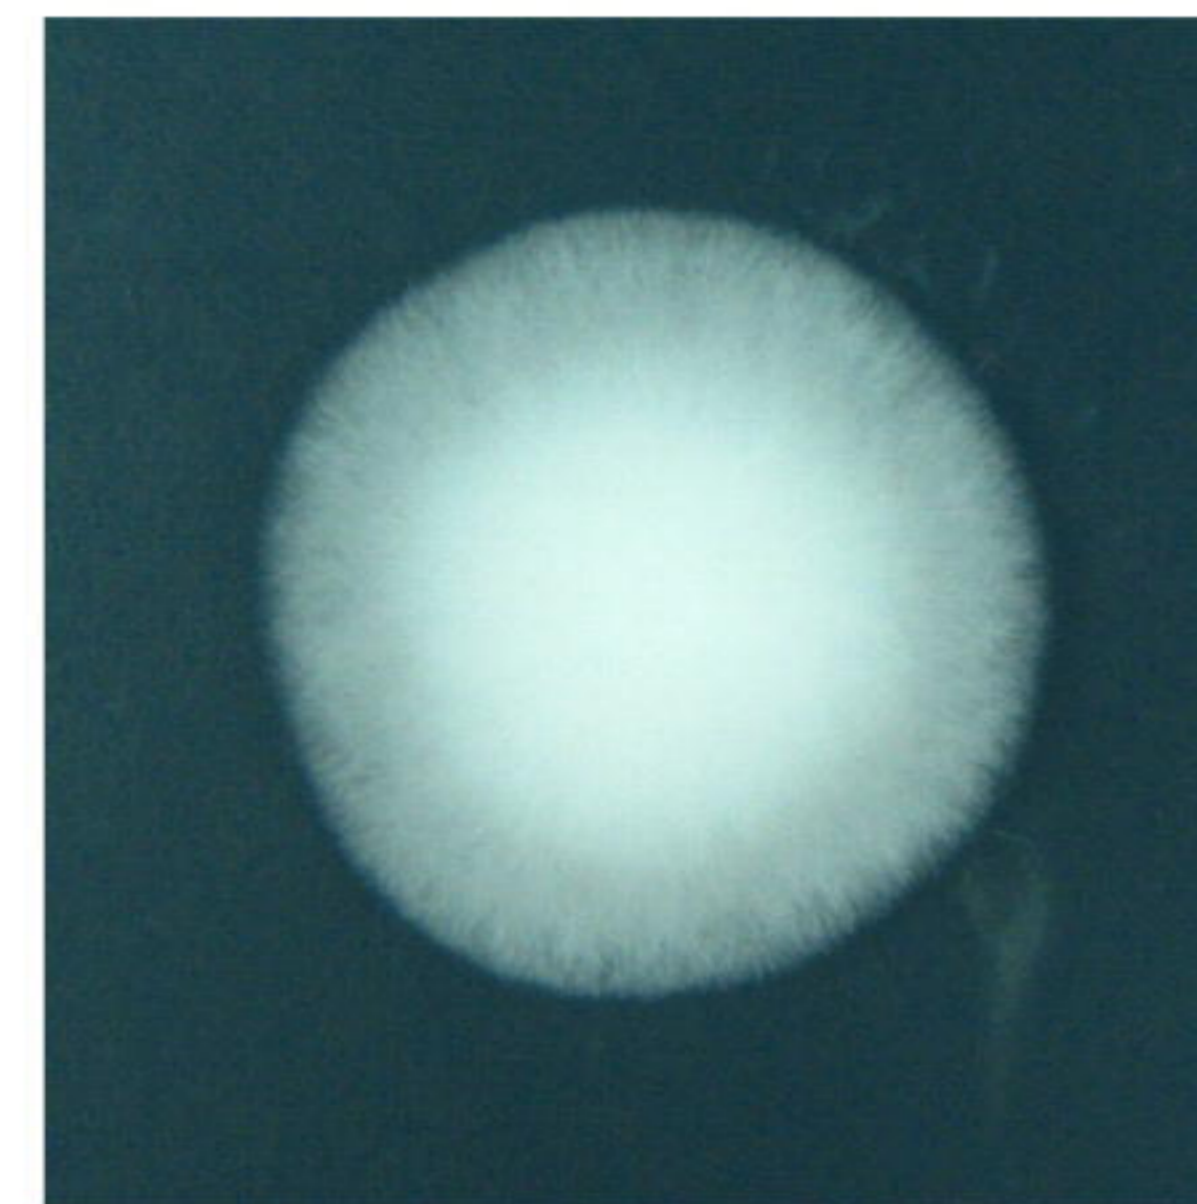

$\Delta areA$

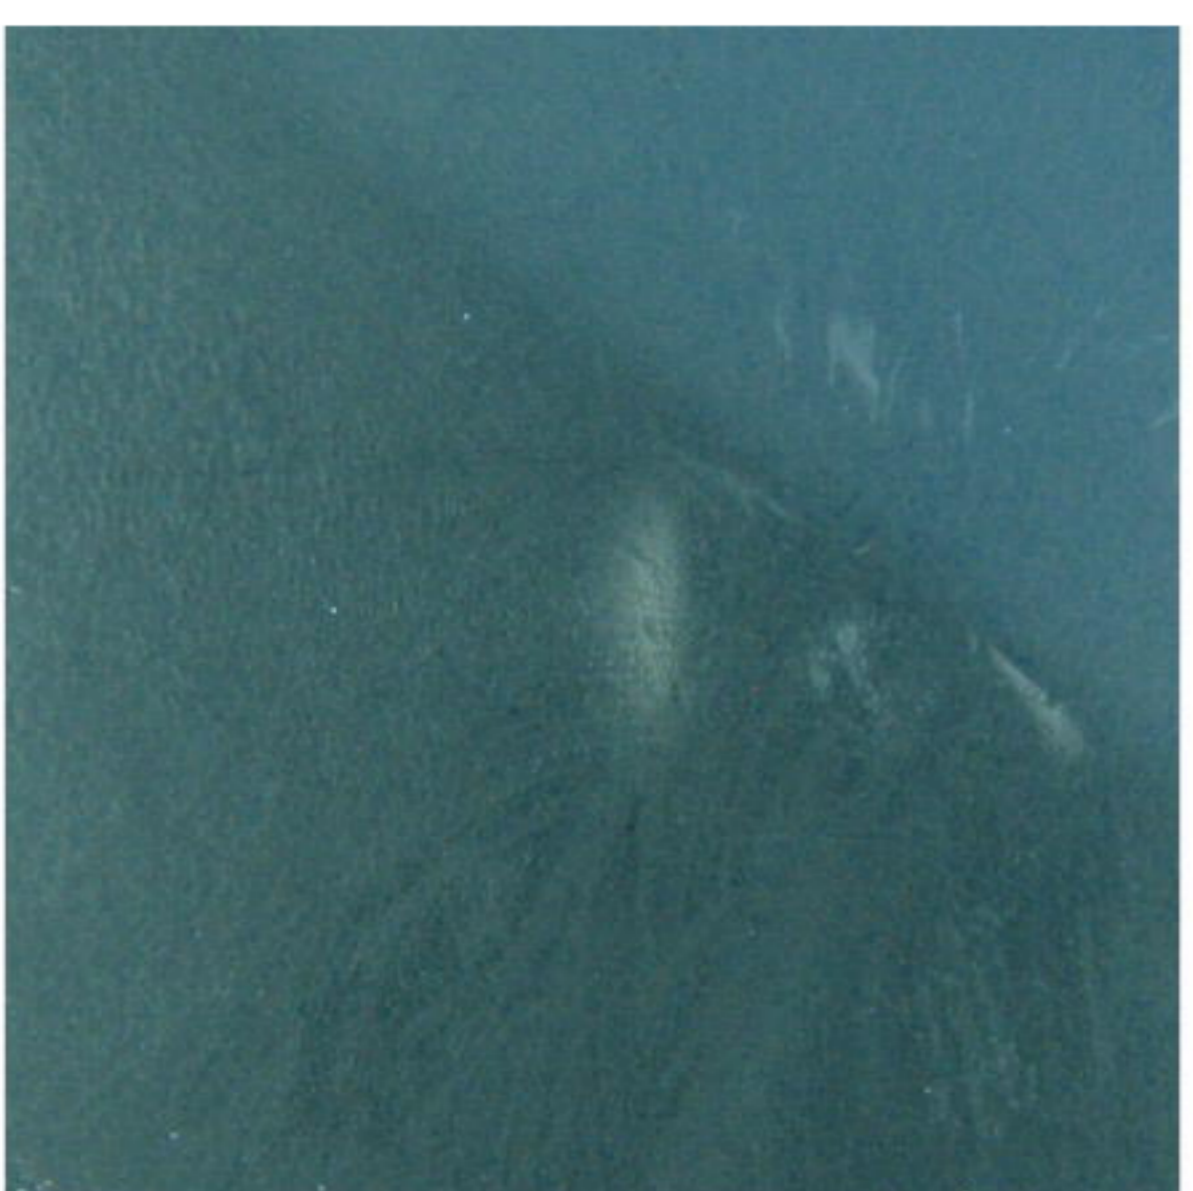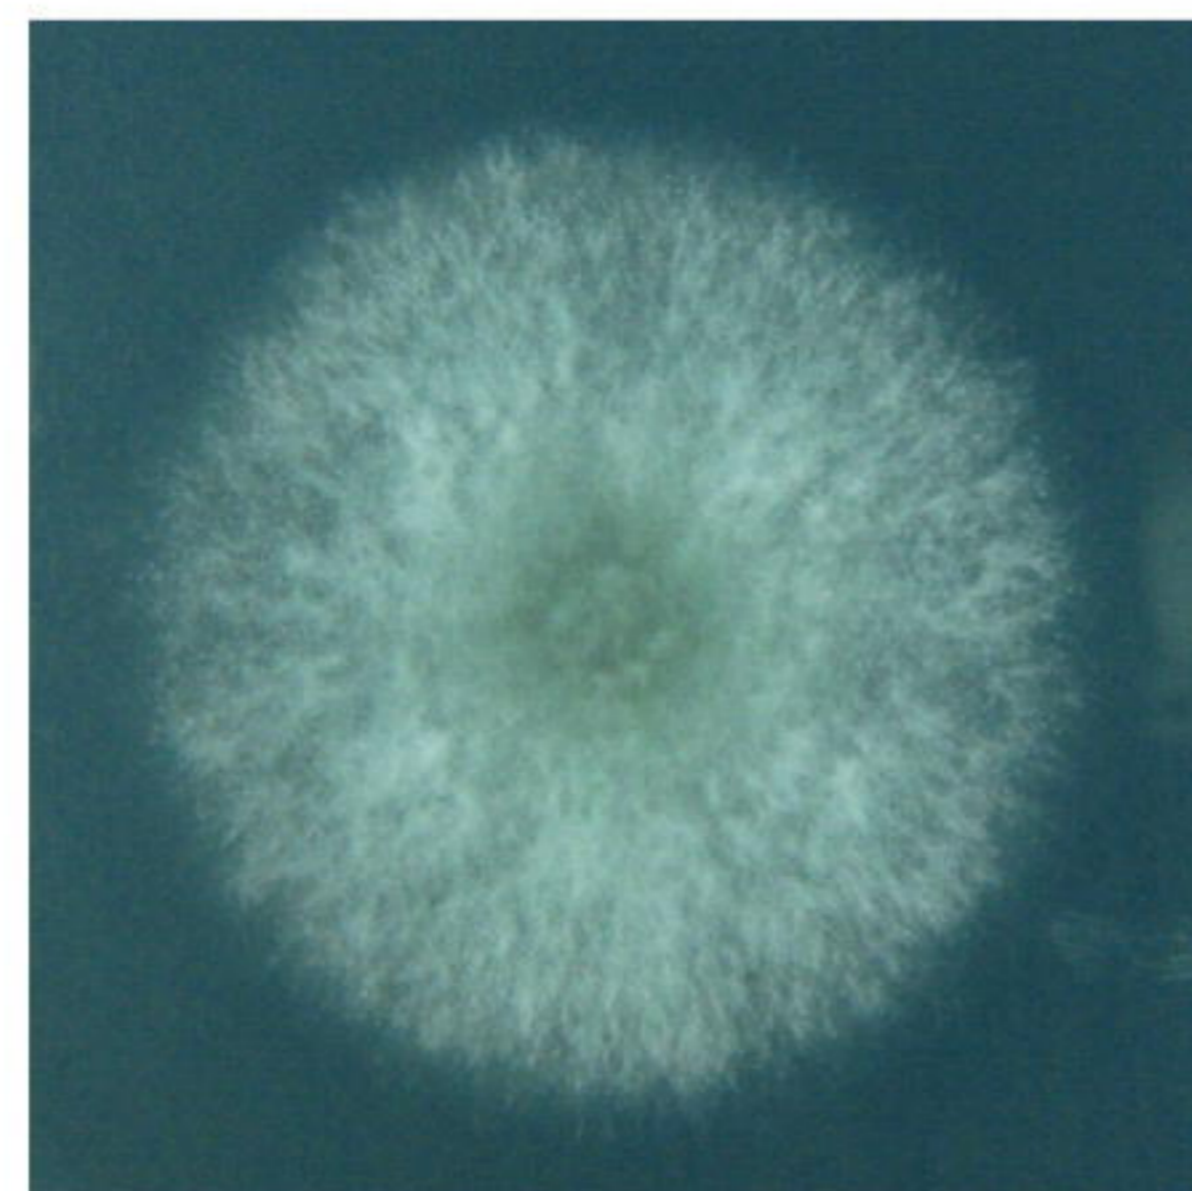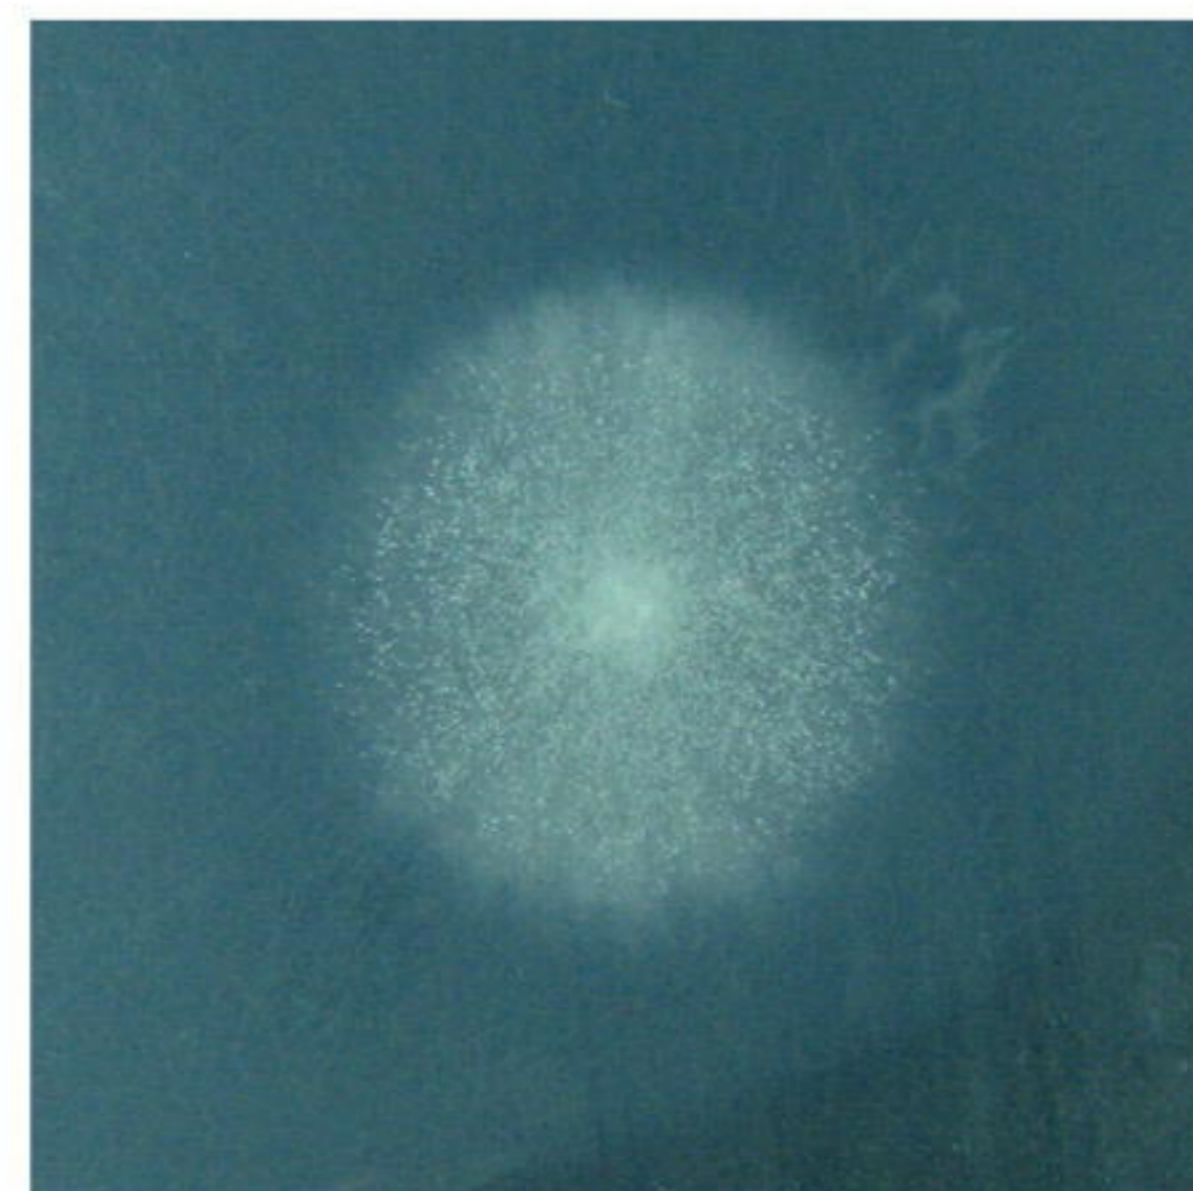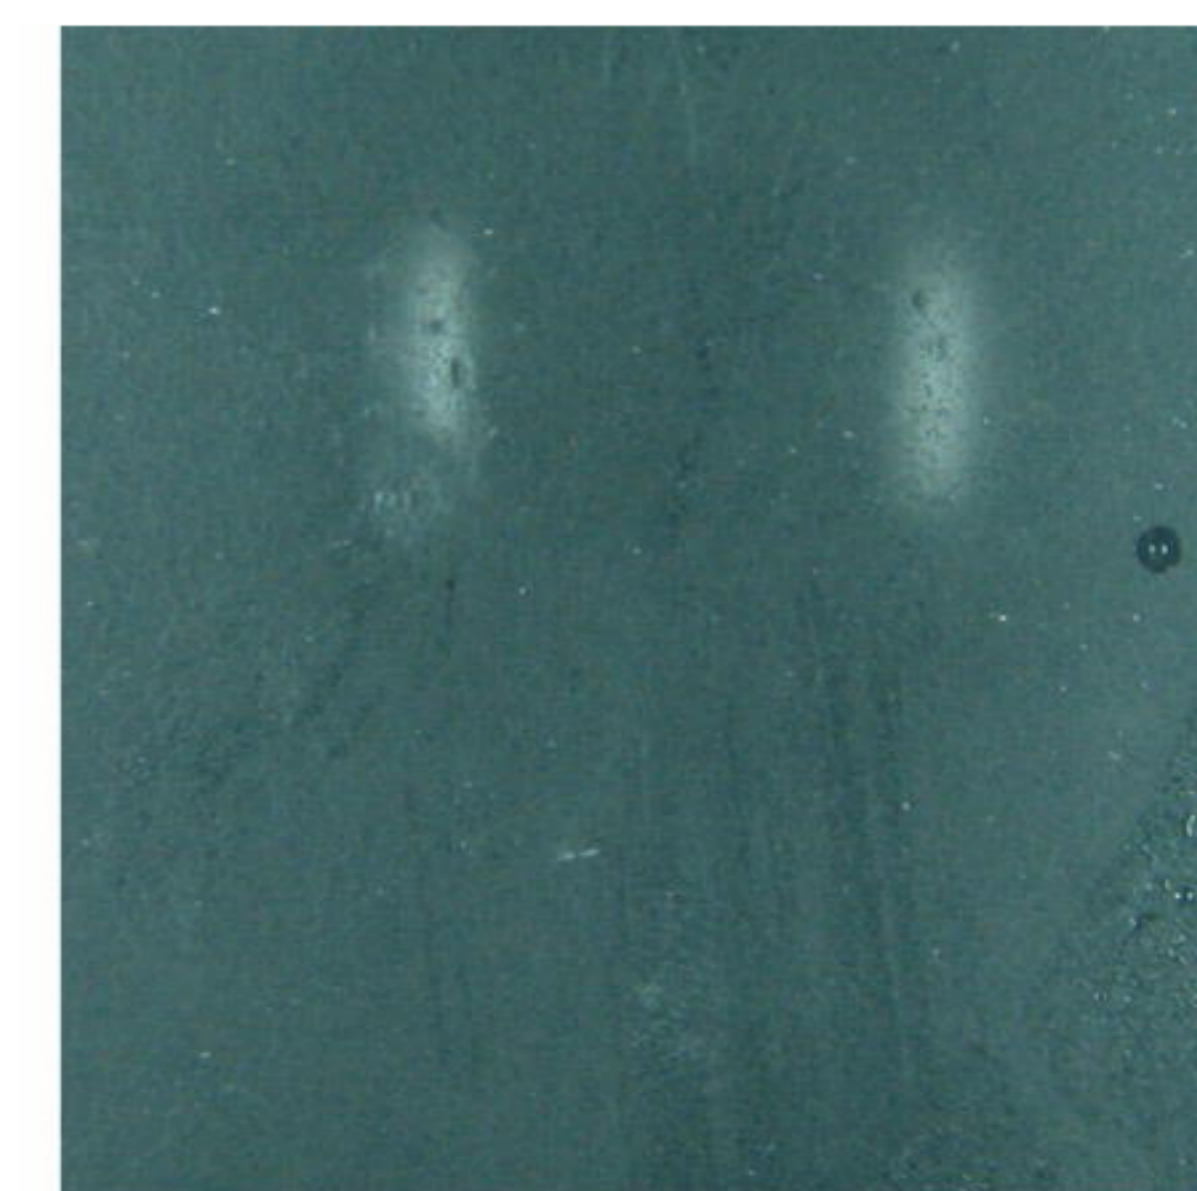



### A1160p+

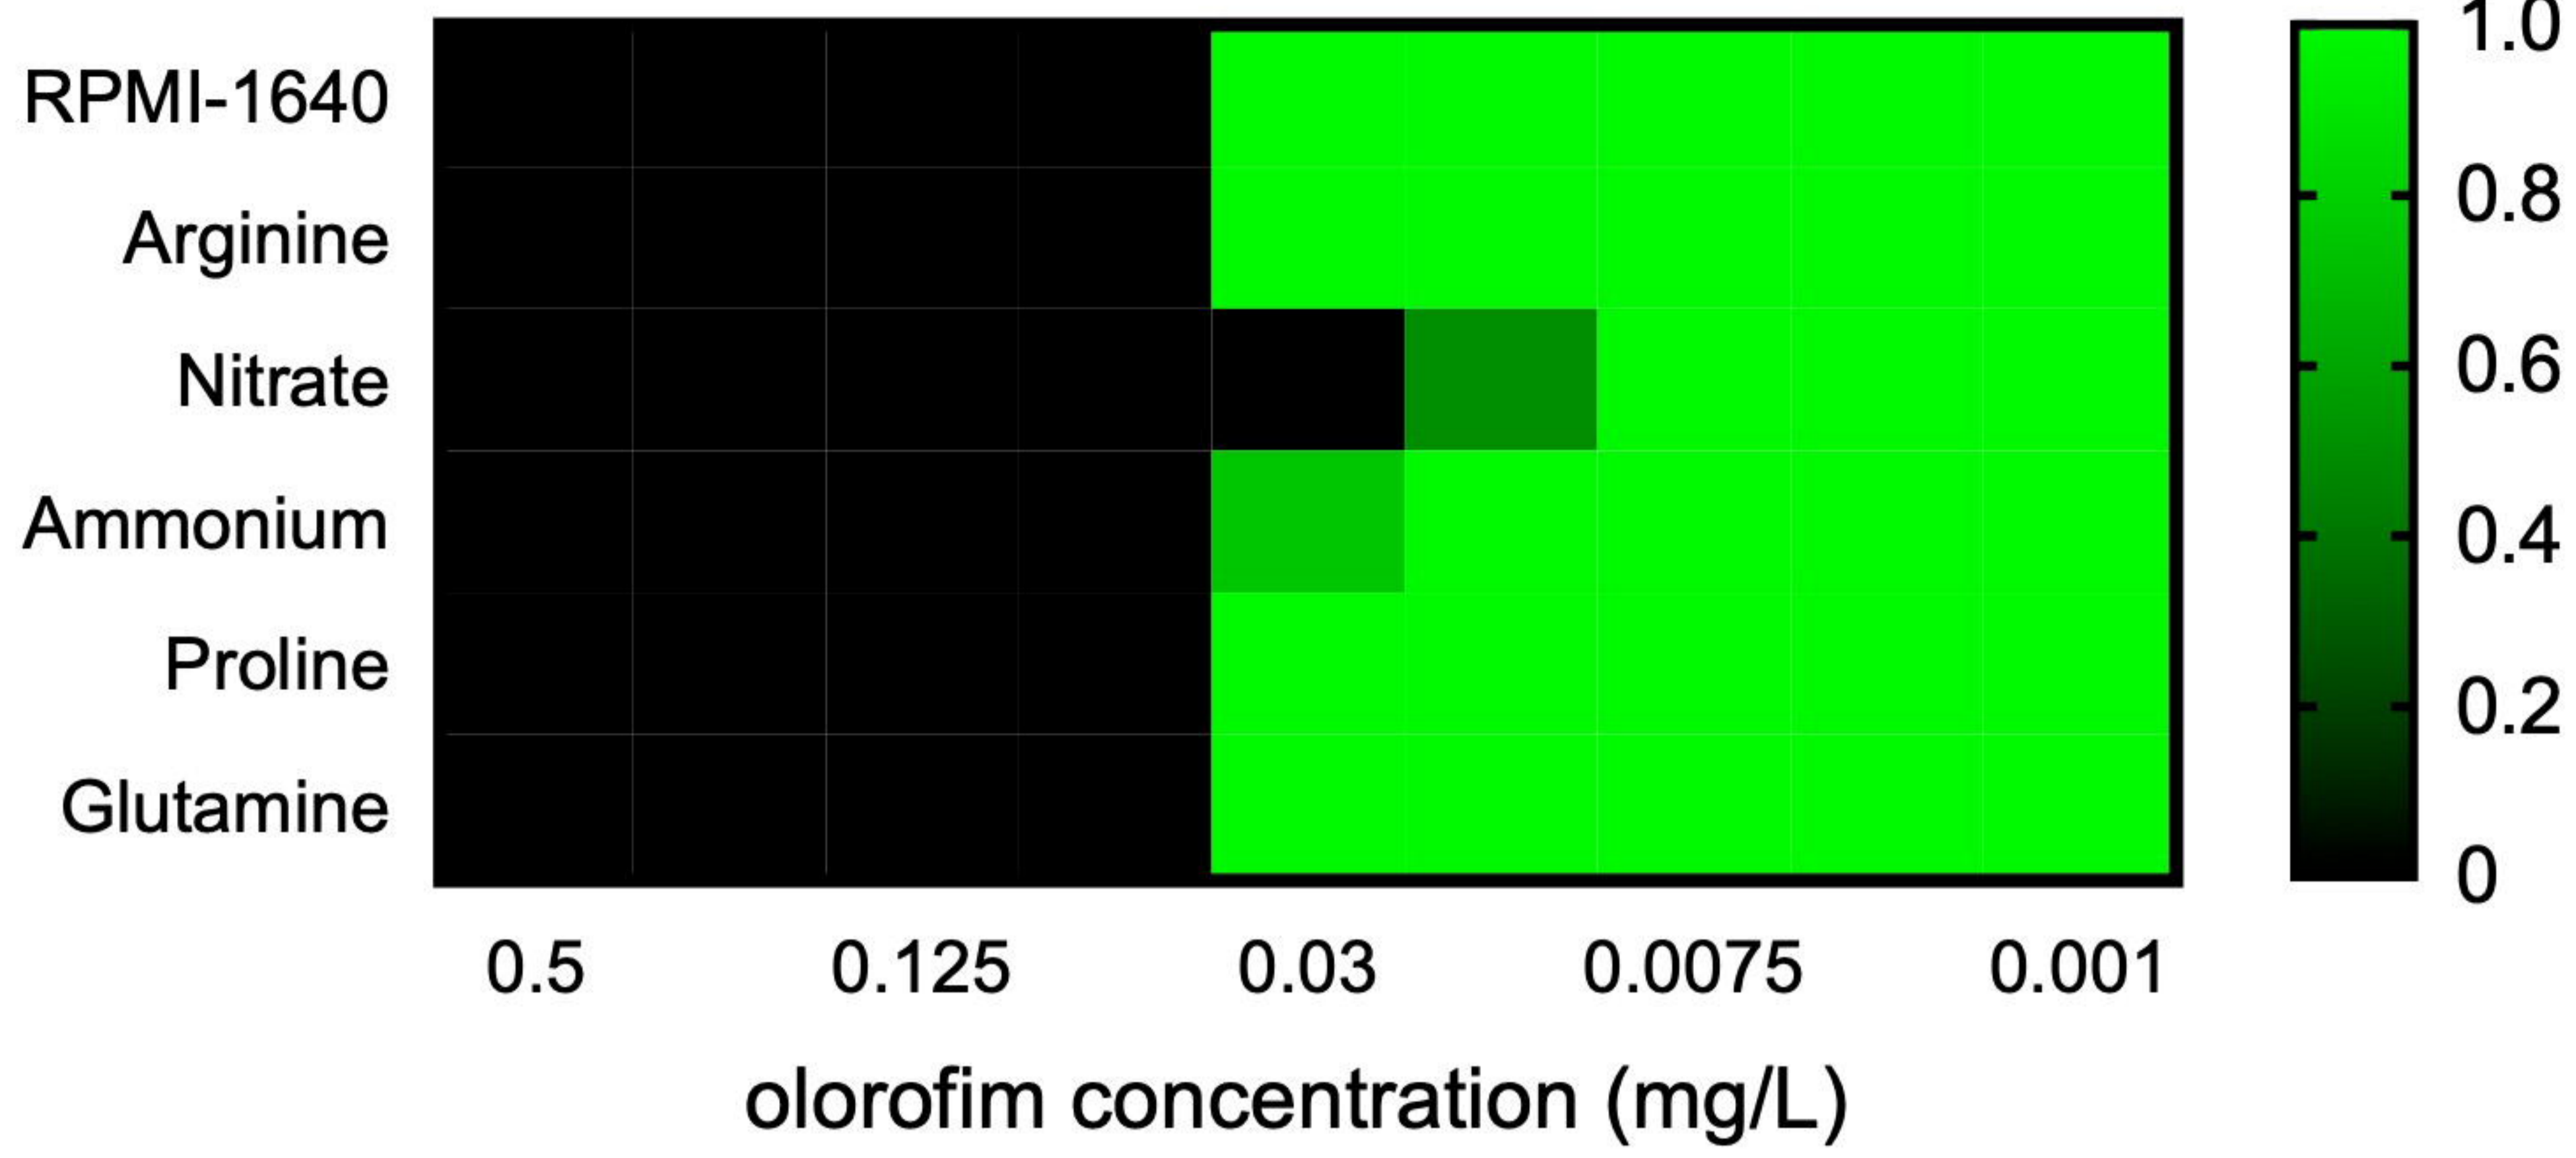

### $\Delta hapB$

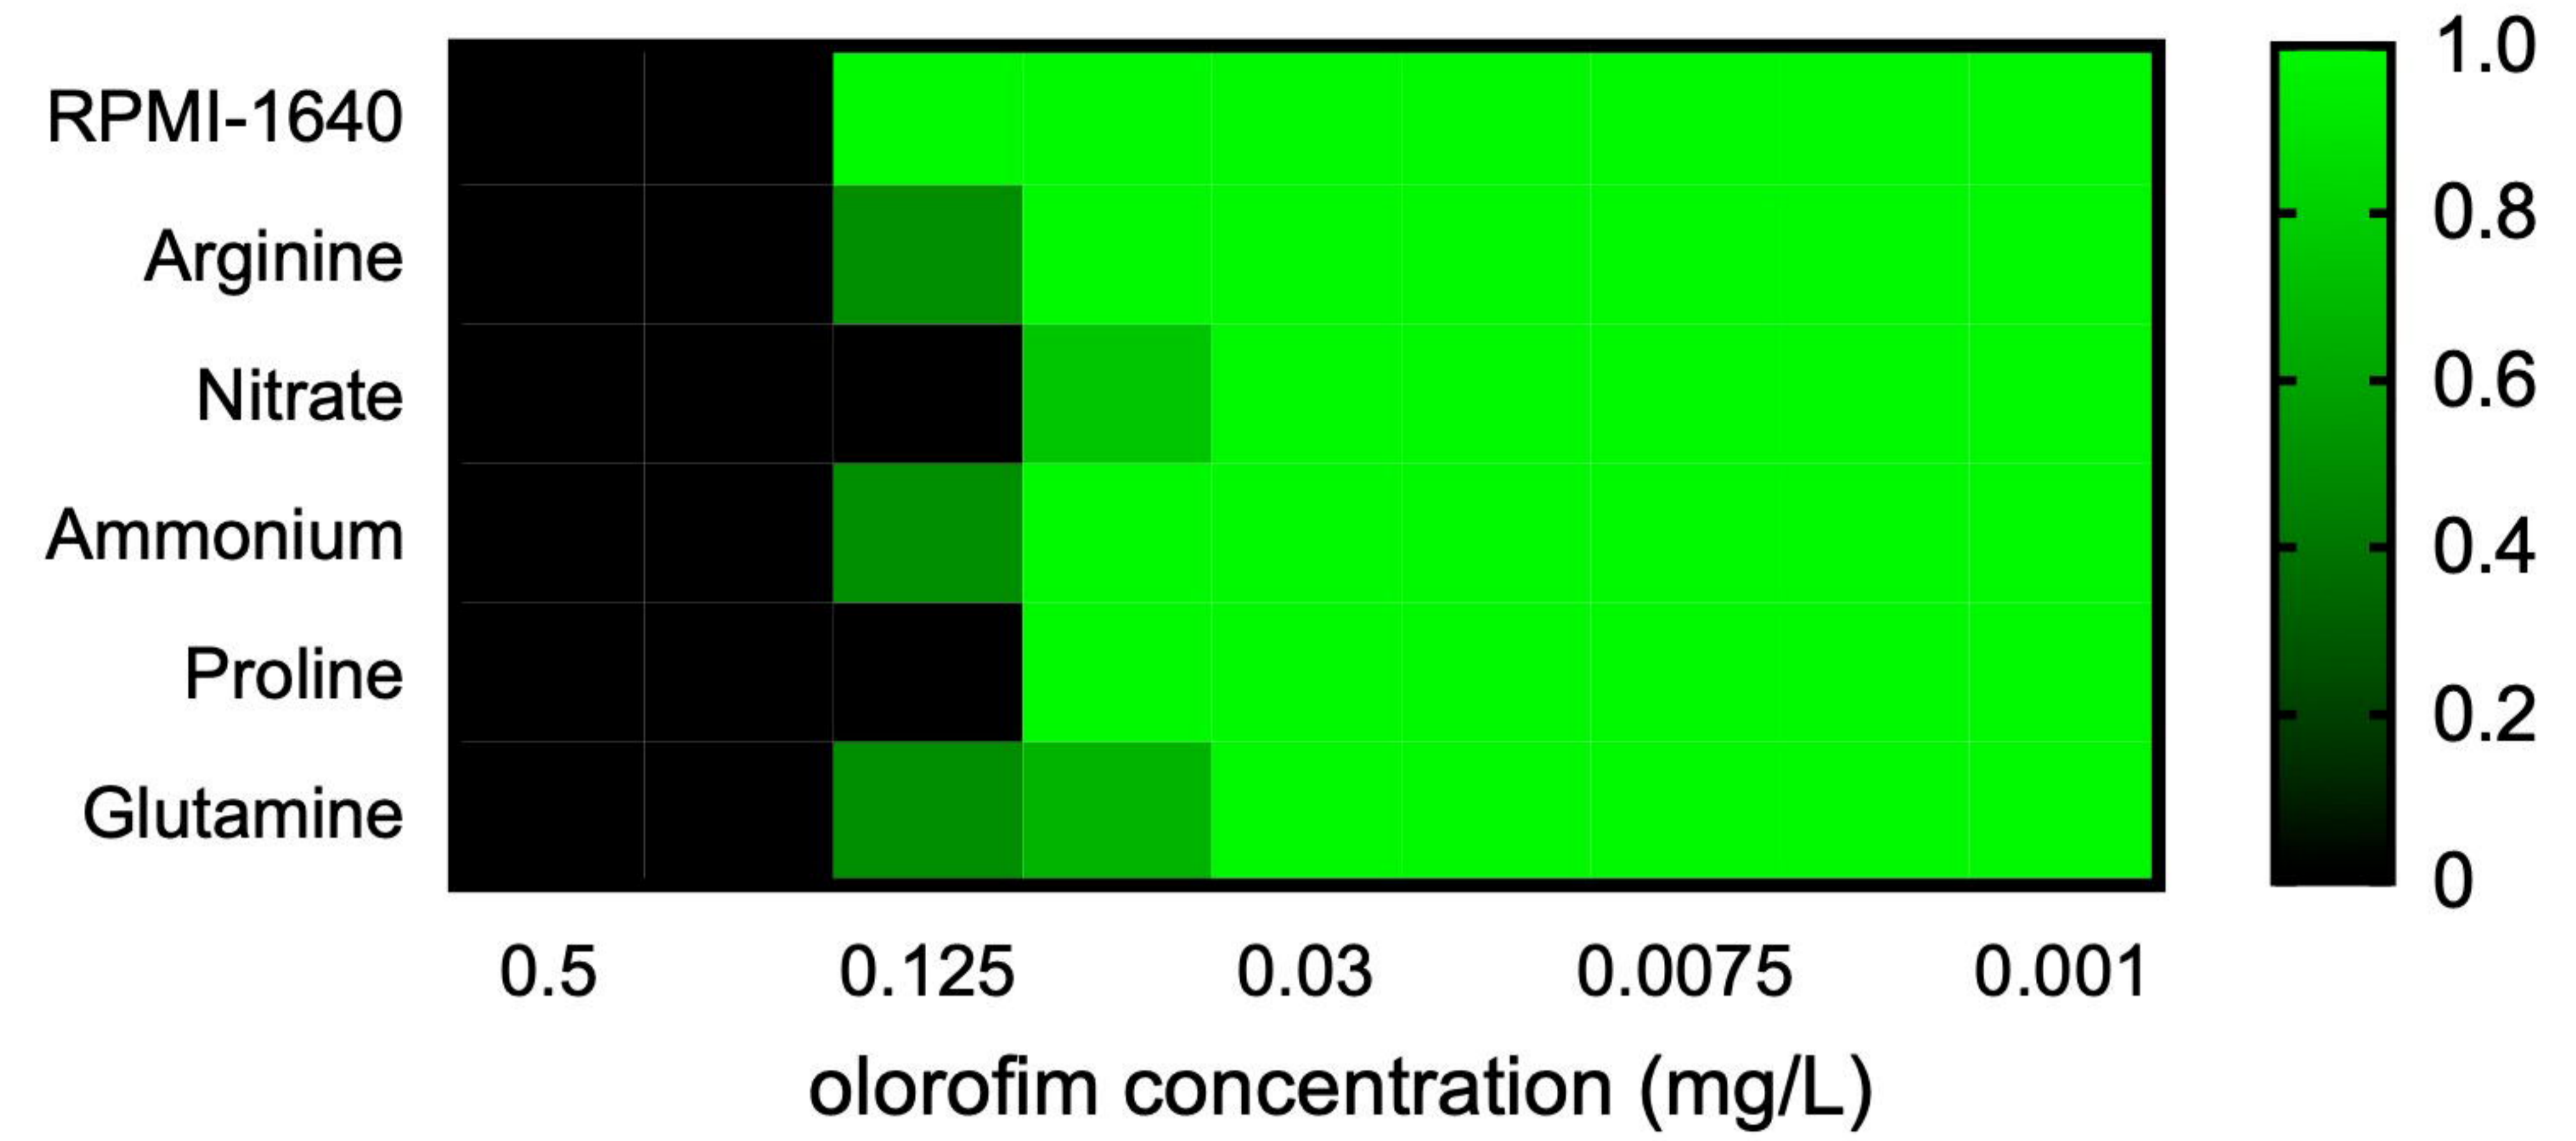

### $\Delta devR$

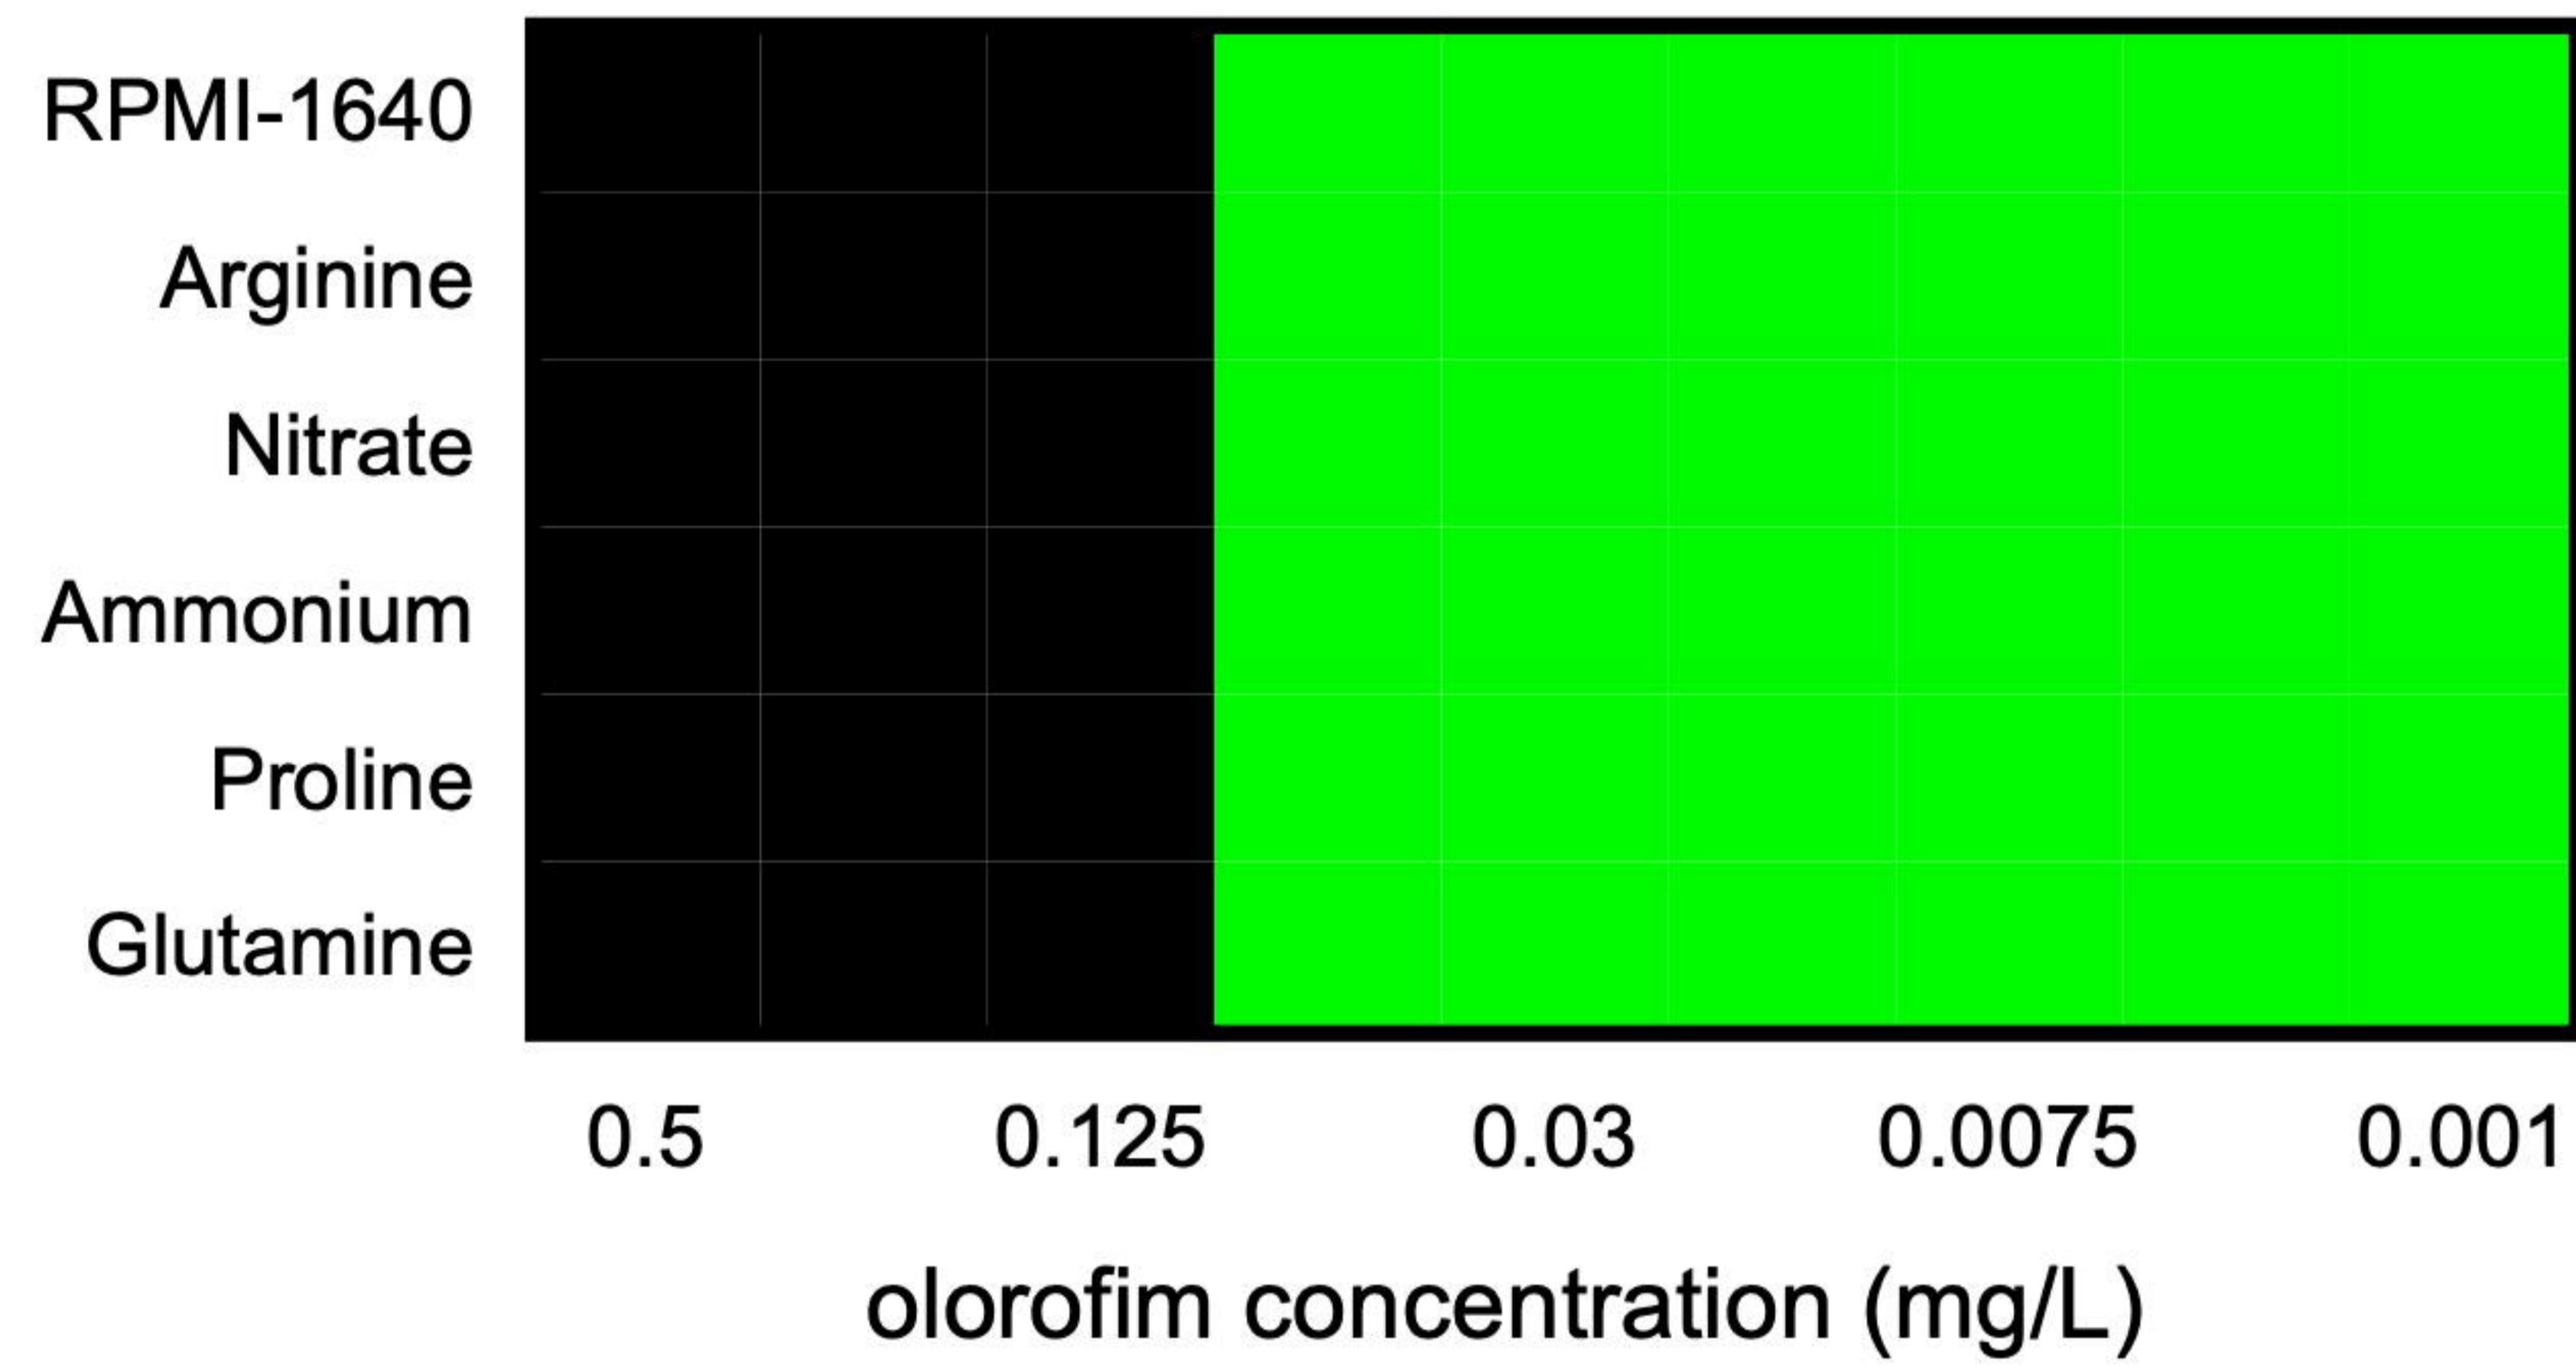

### $\Delta areA$

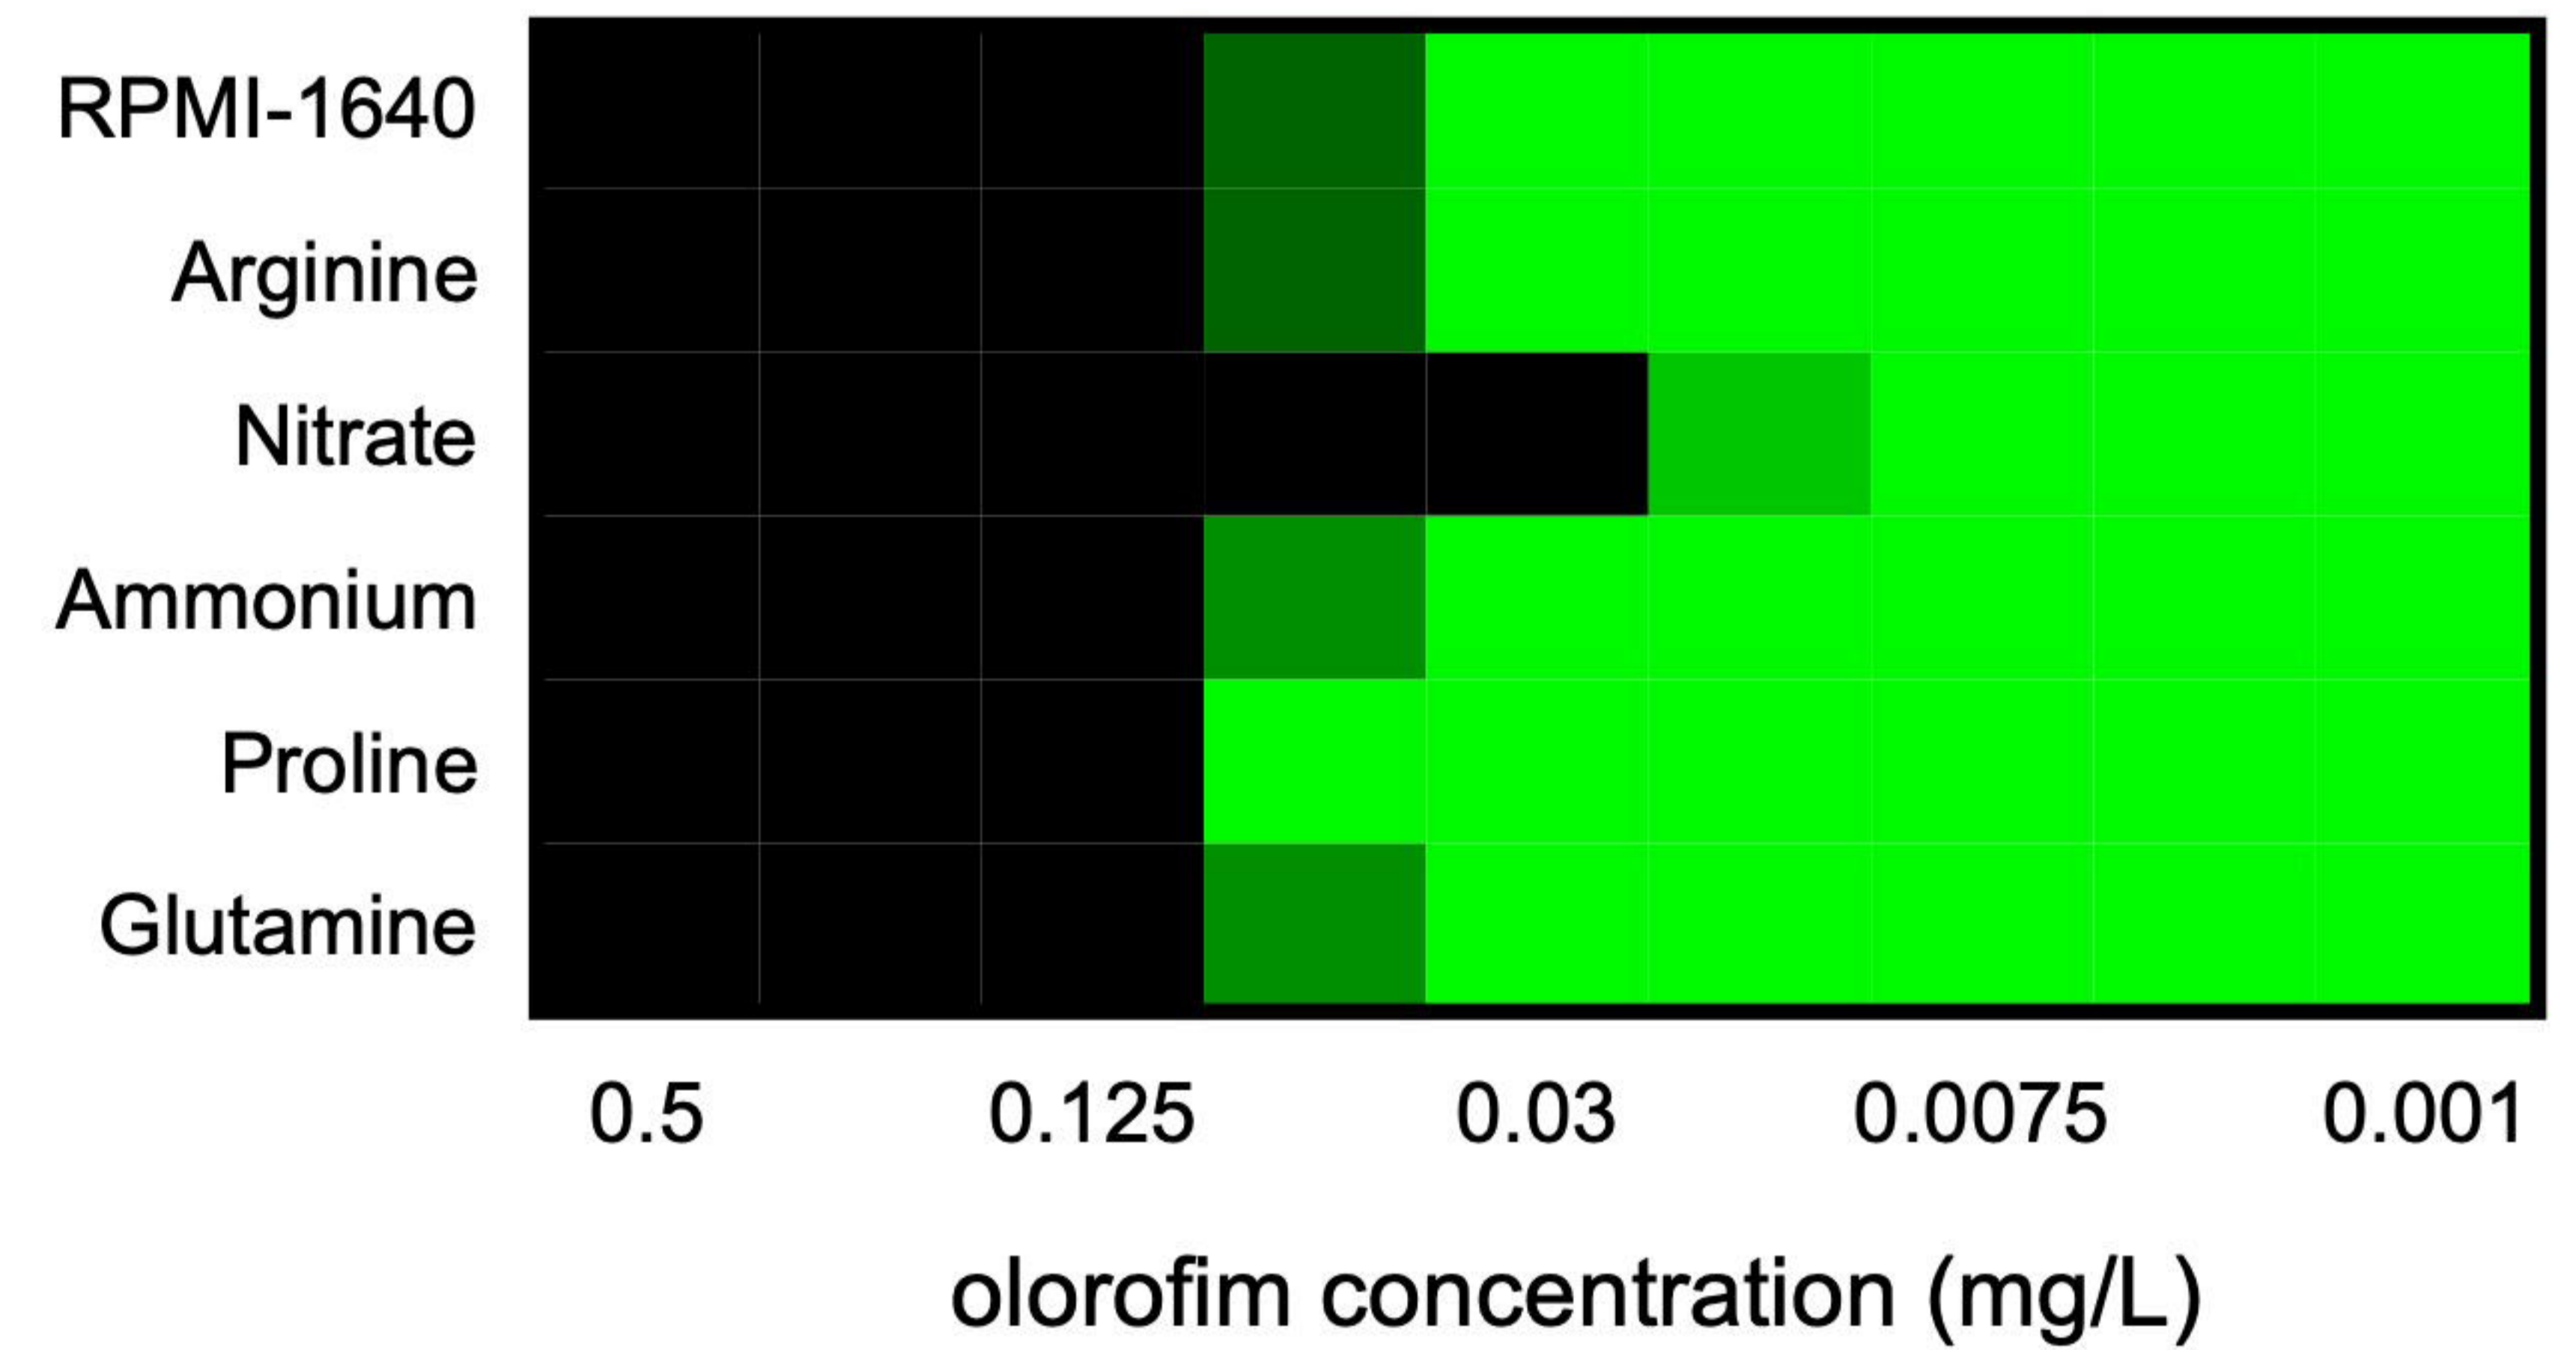

### $\Delta acdX$

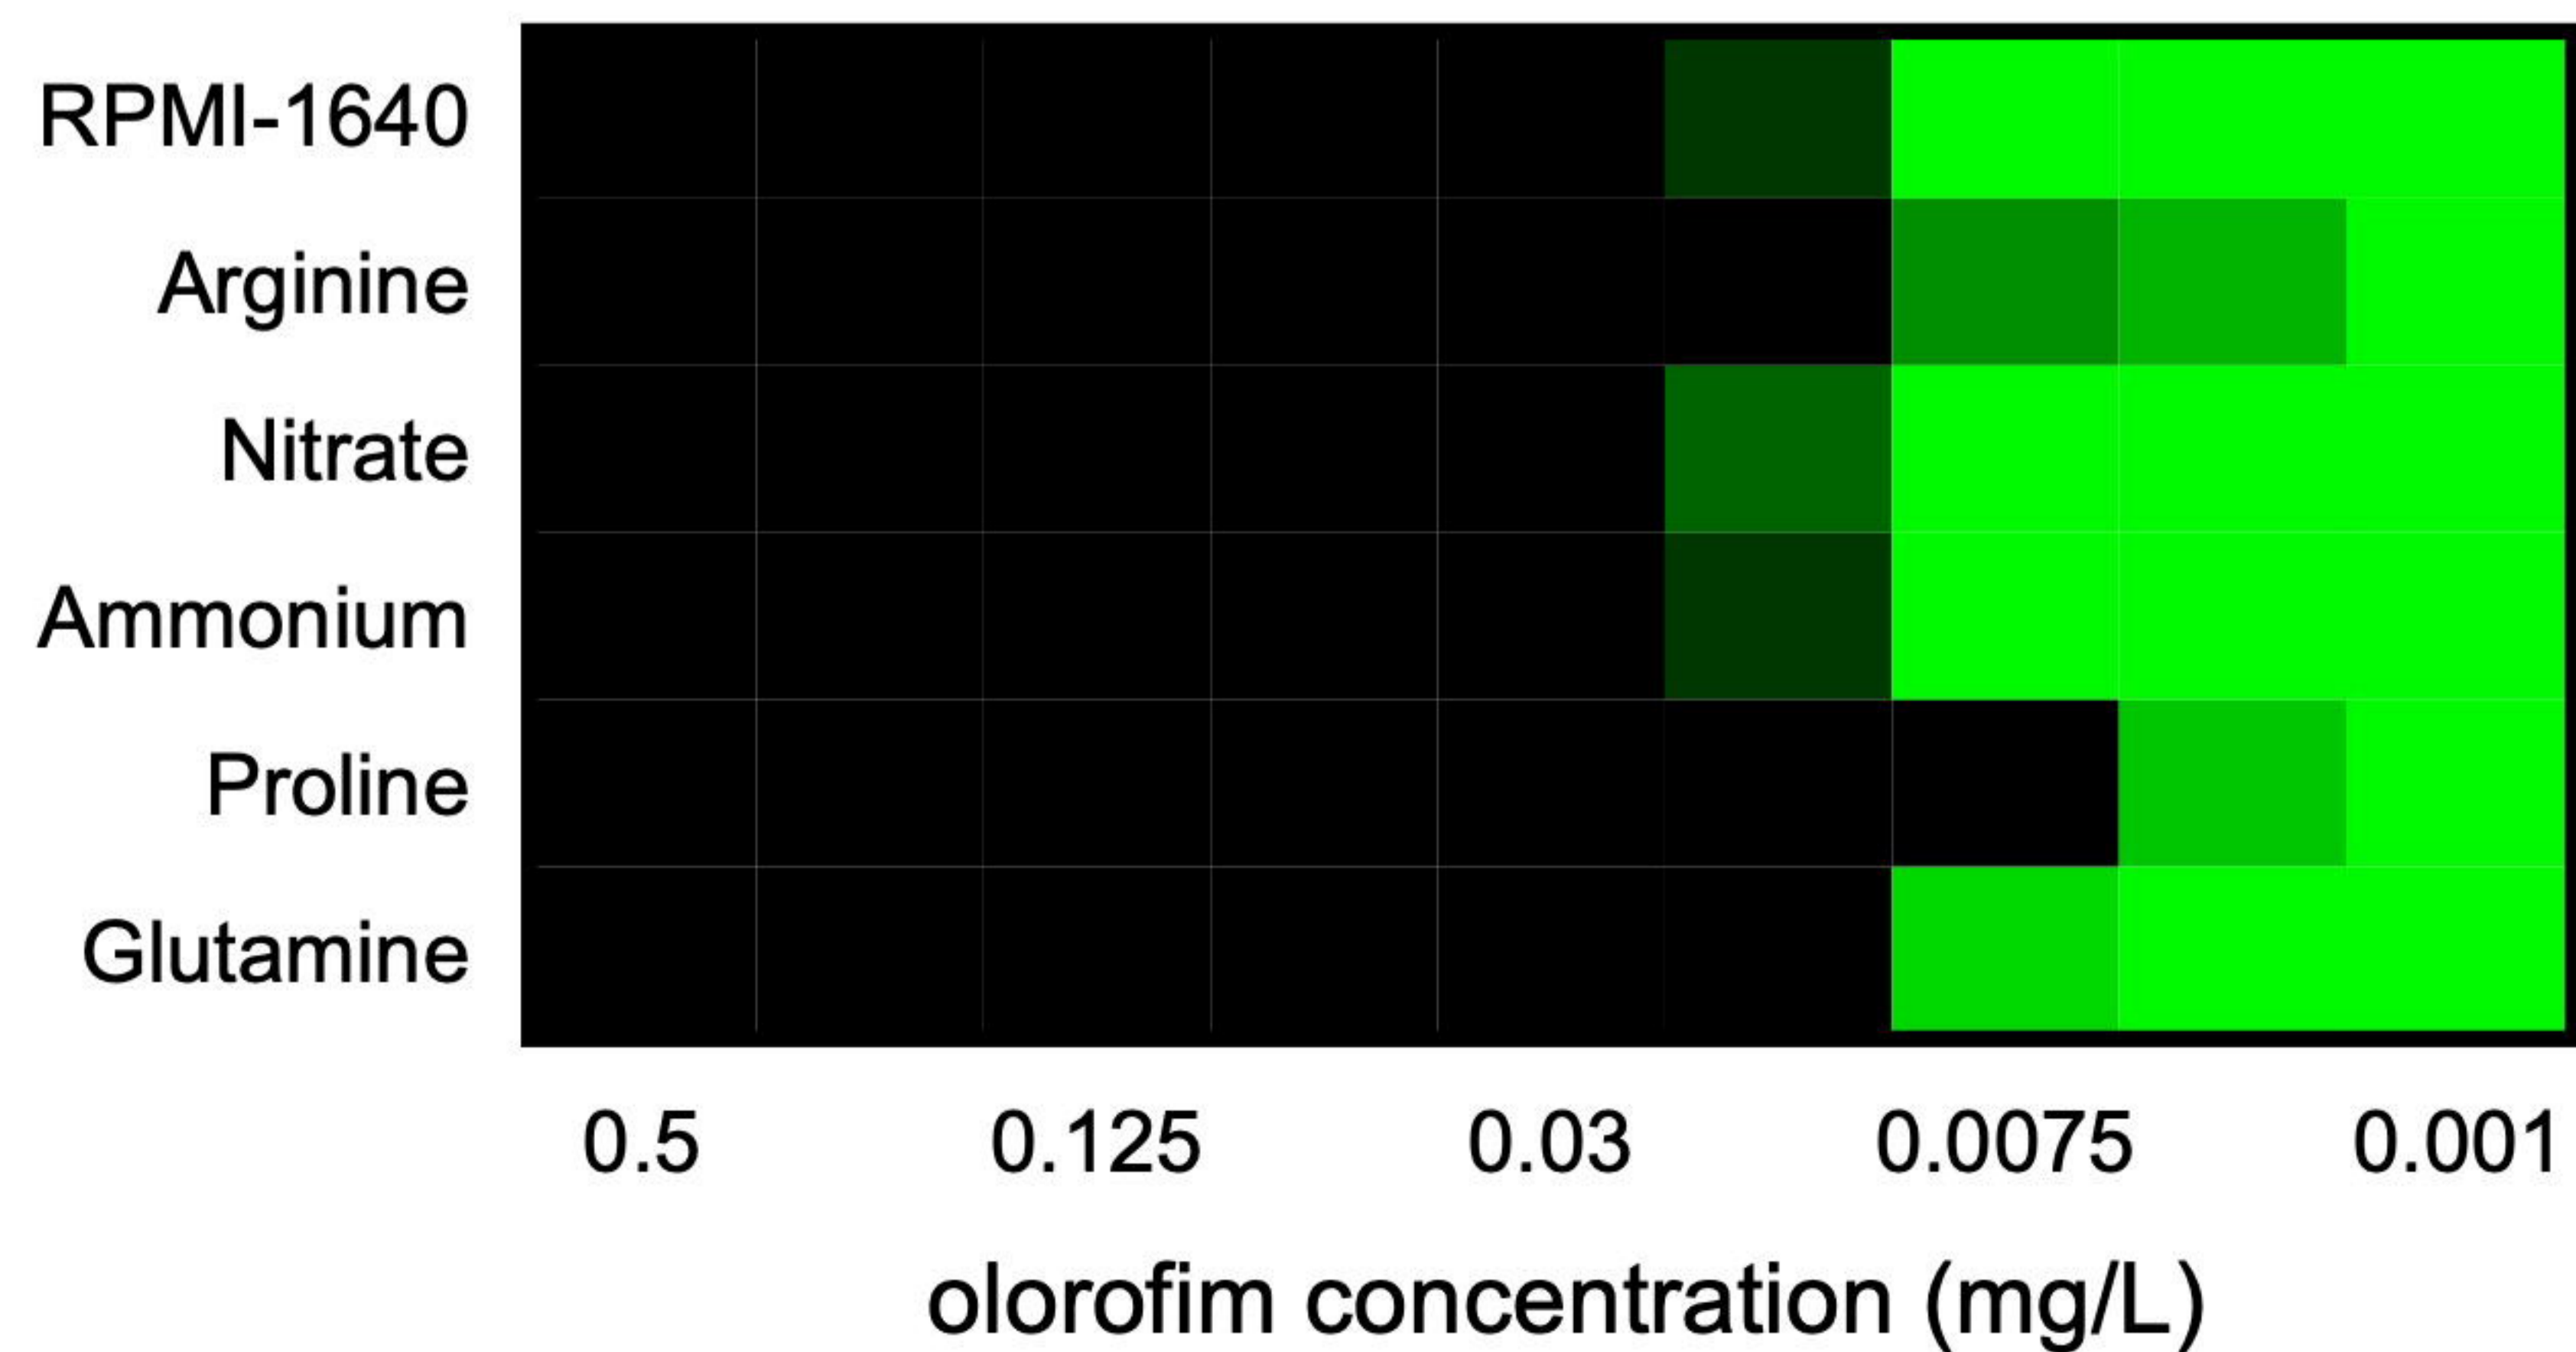



*$\Delta hapB$*

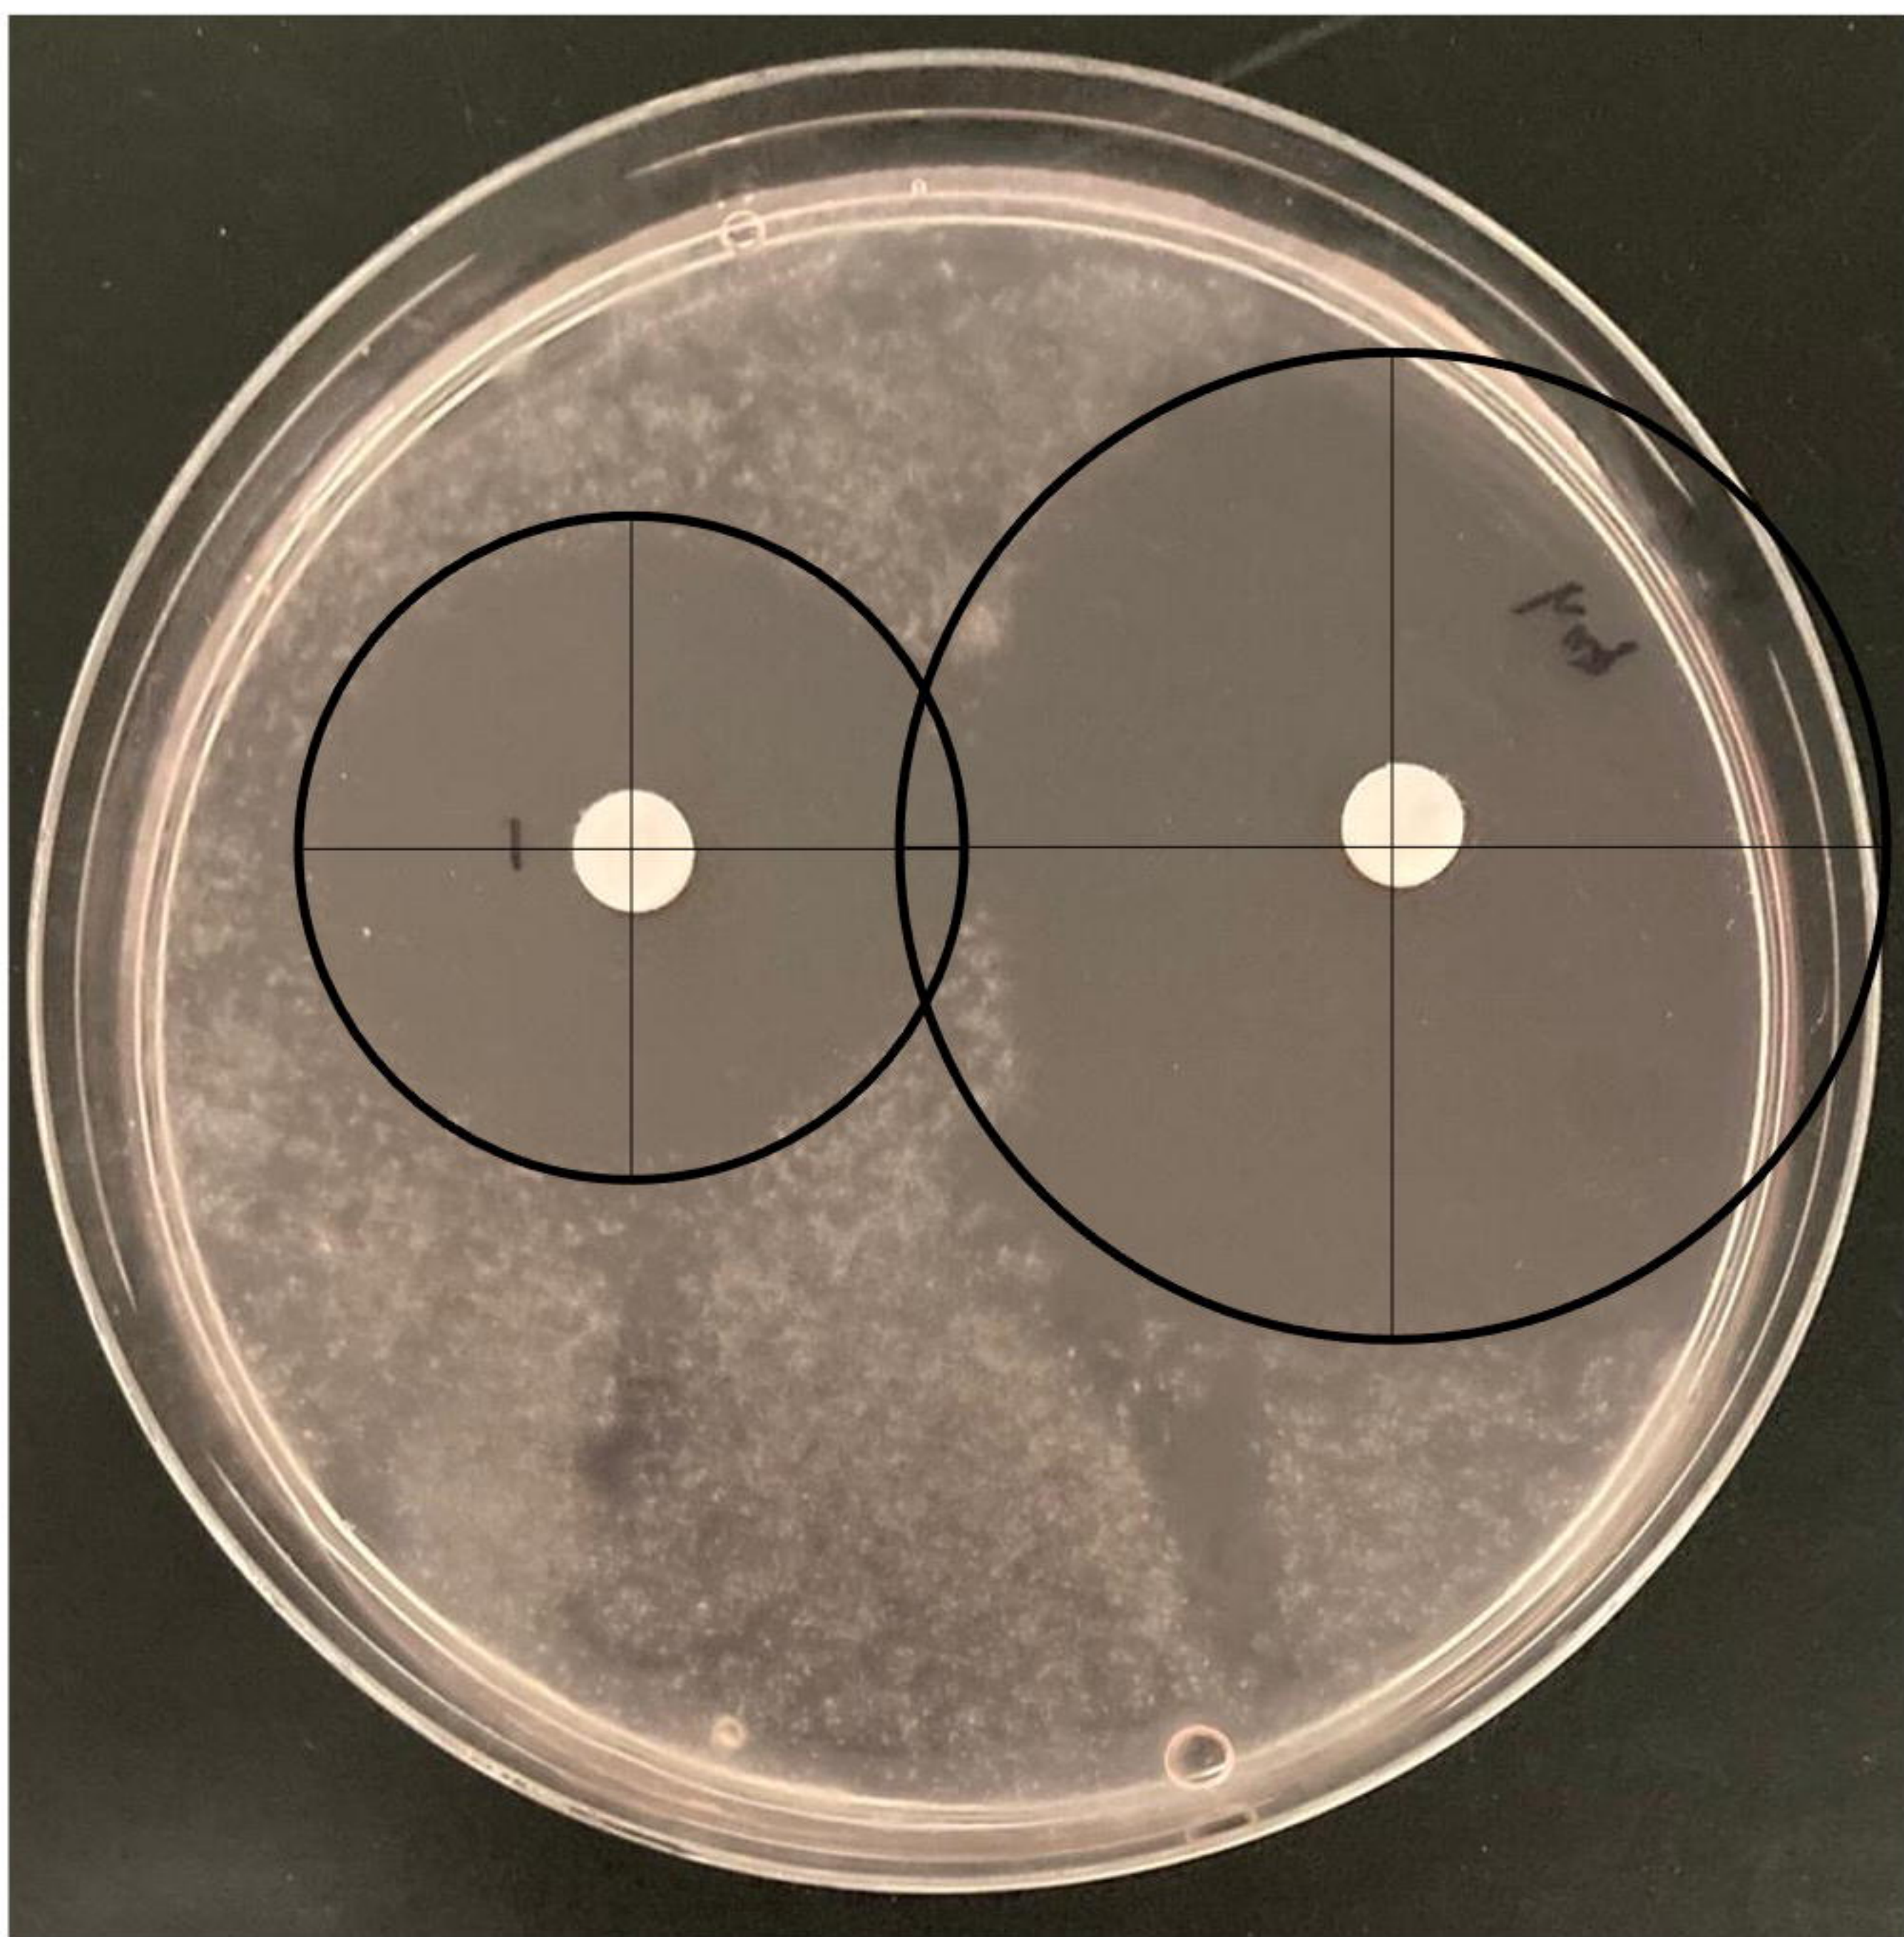

*$\Delta areA$*

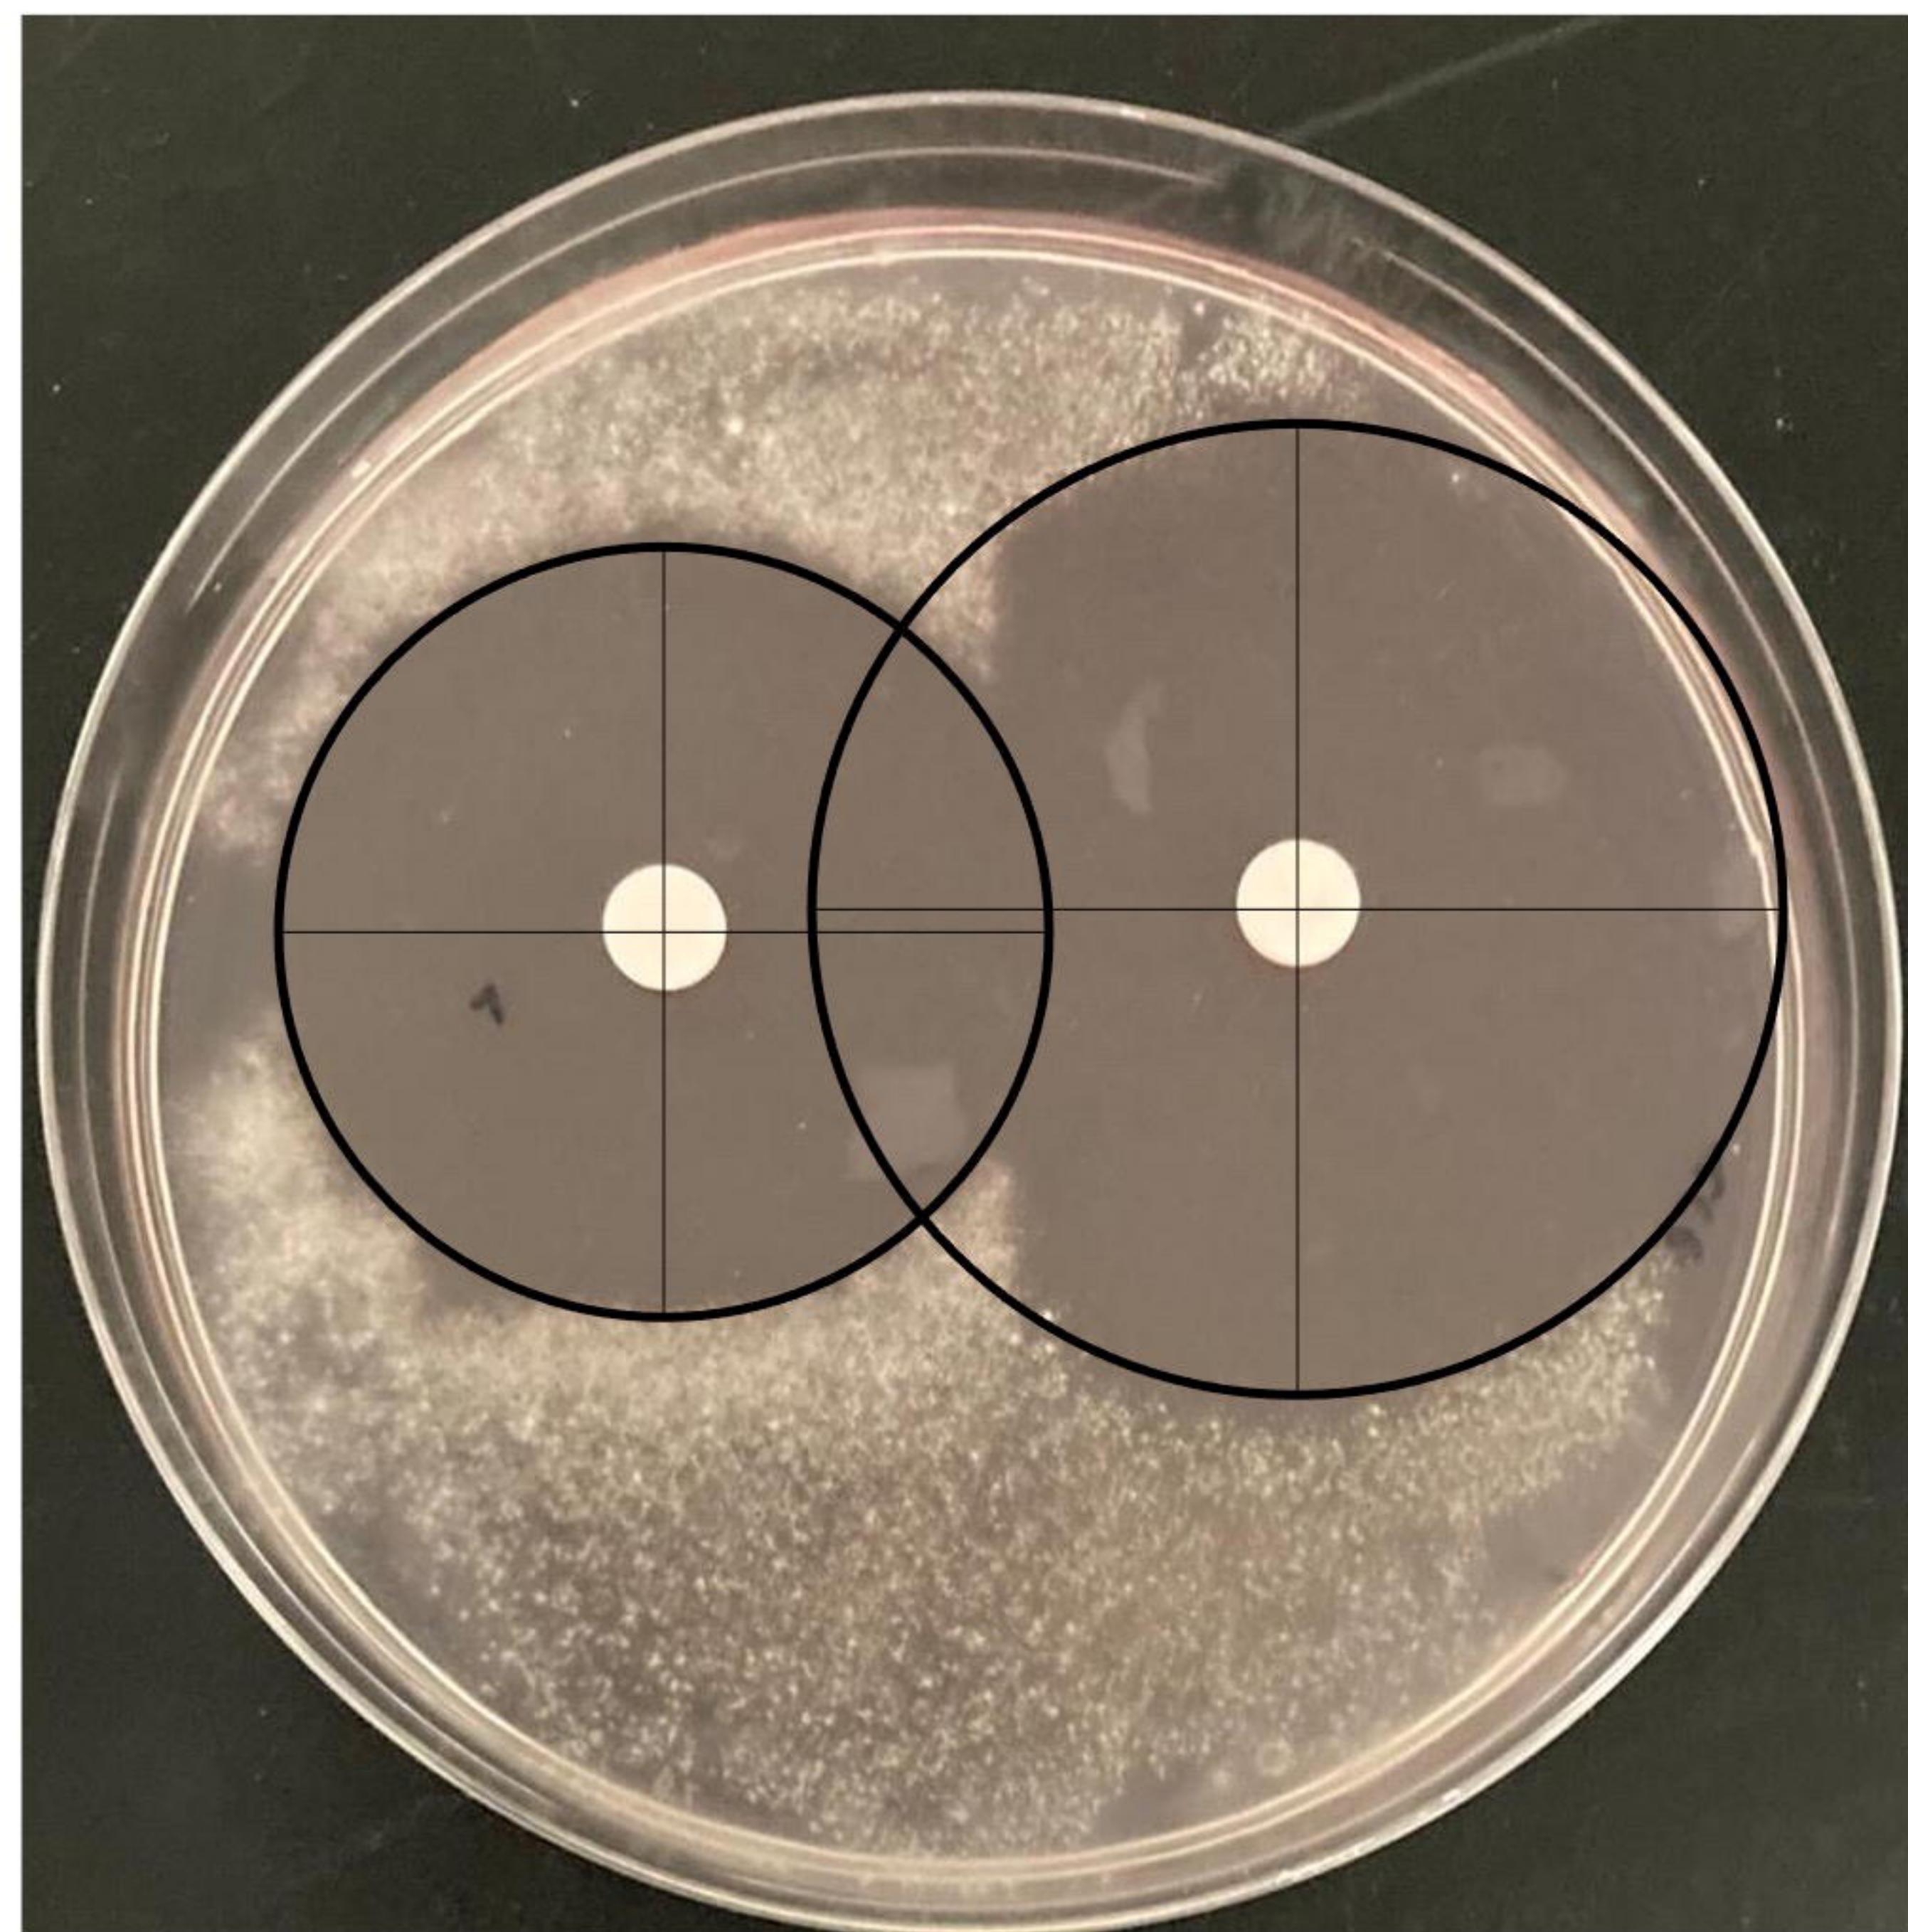

*$\Delta acdX$*

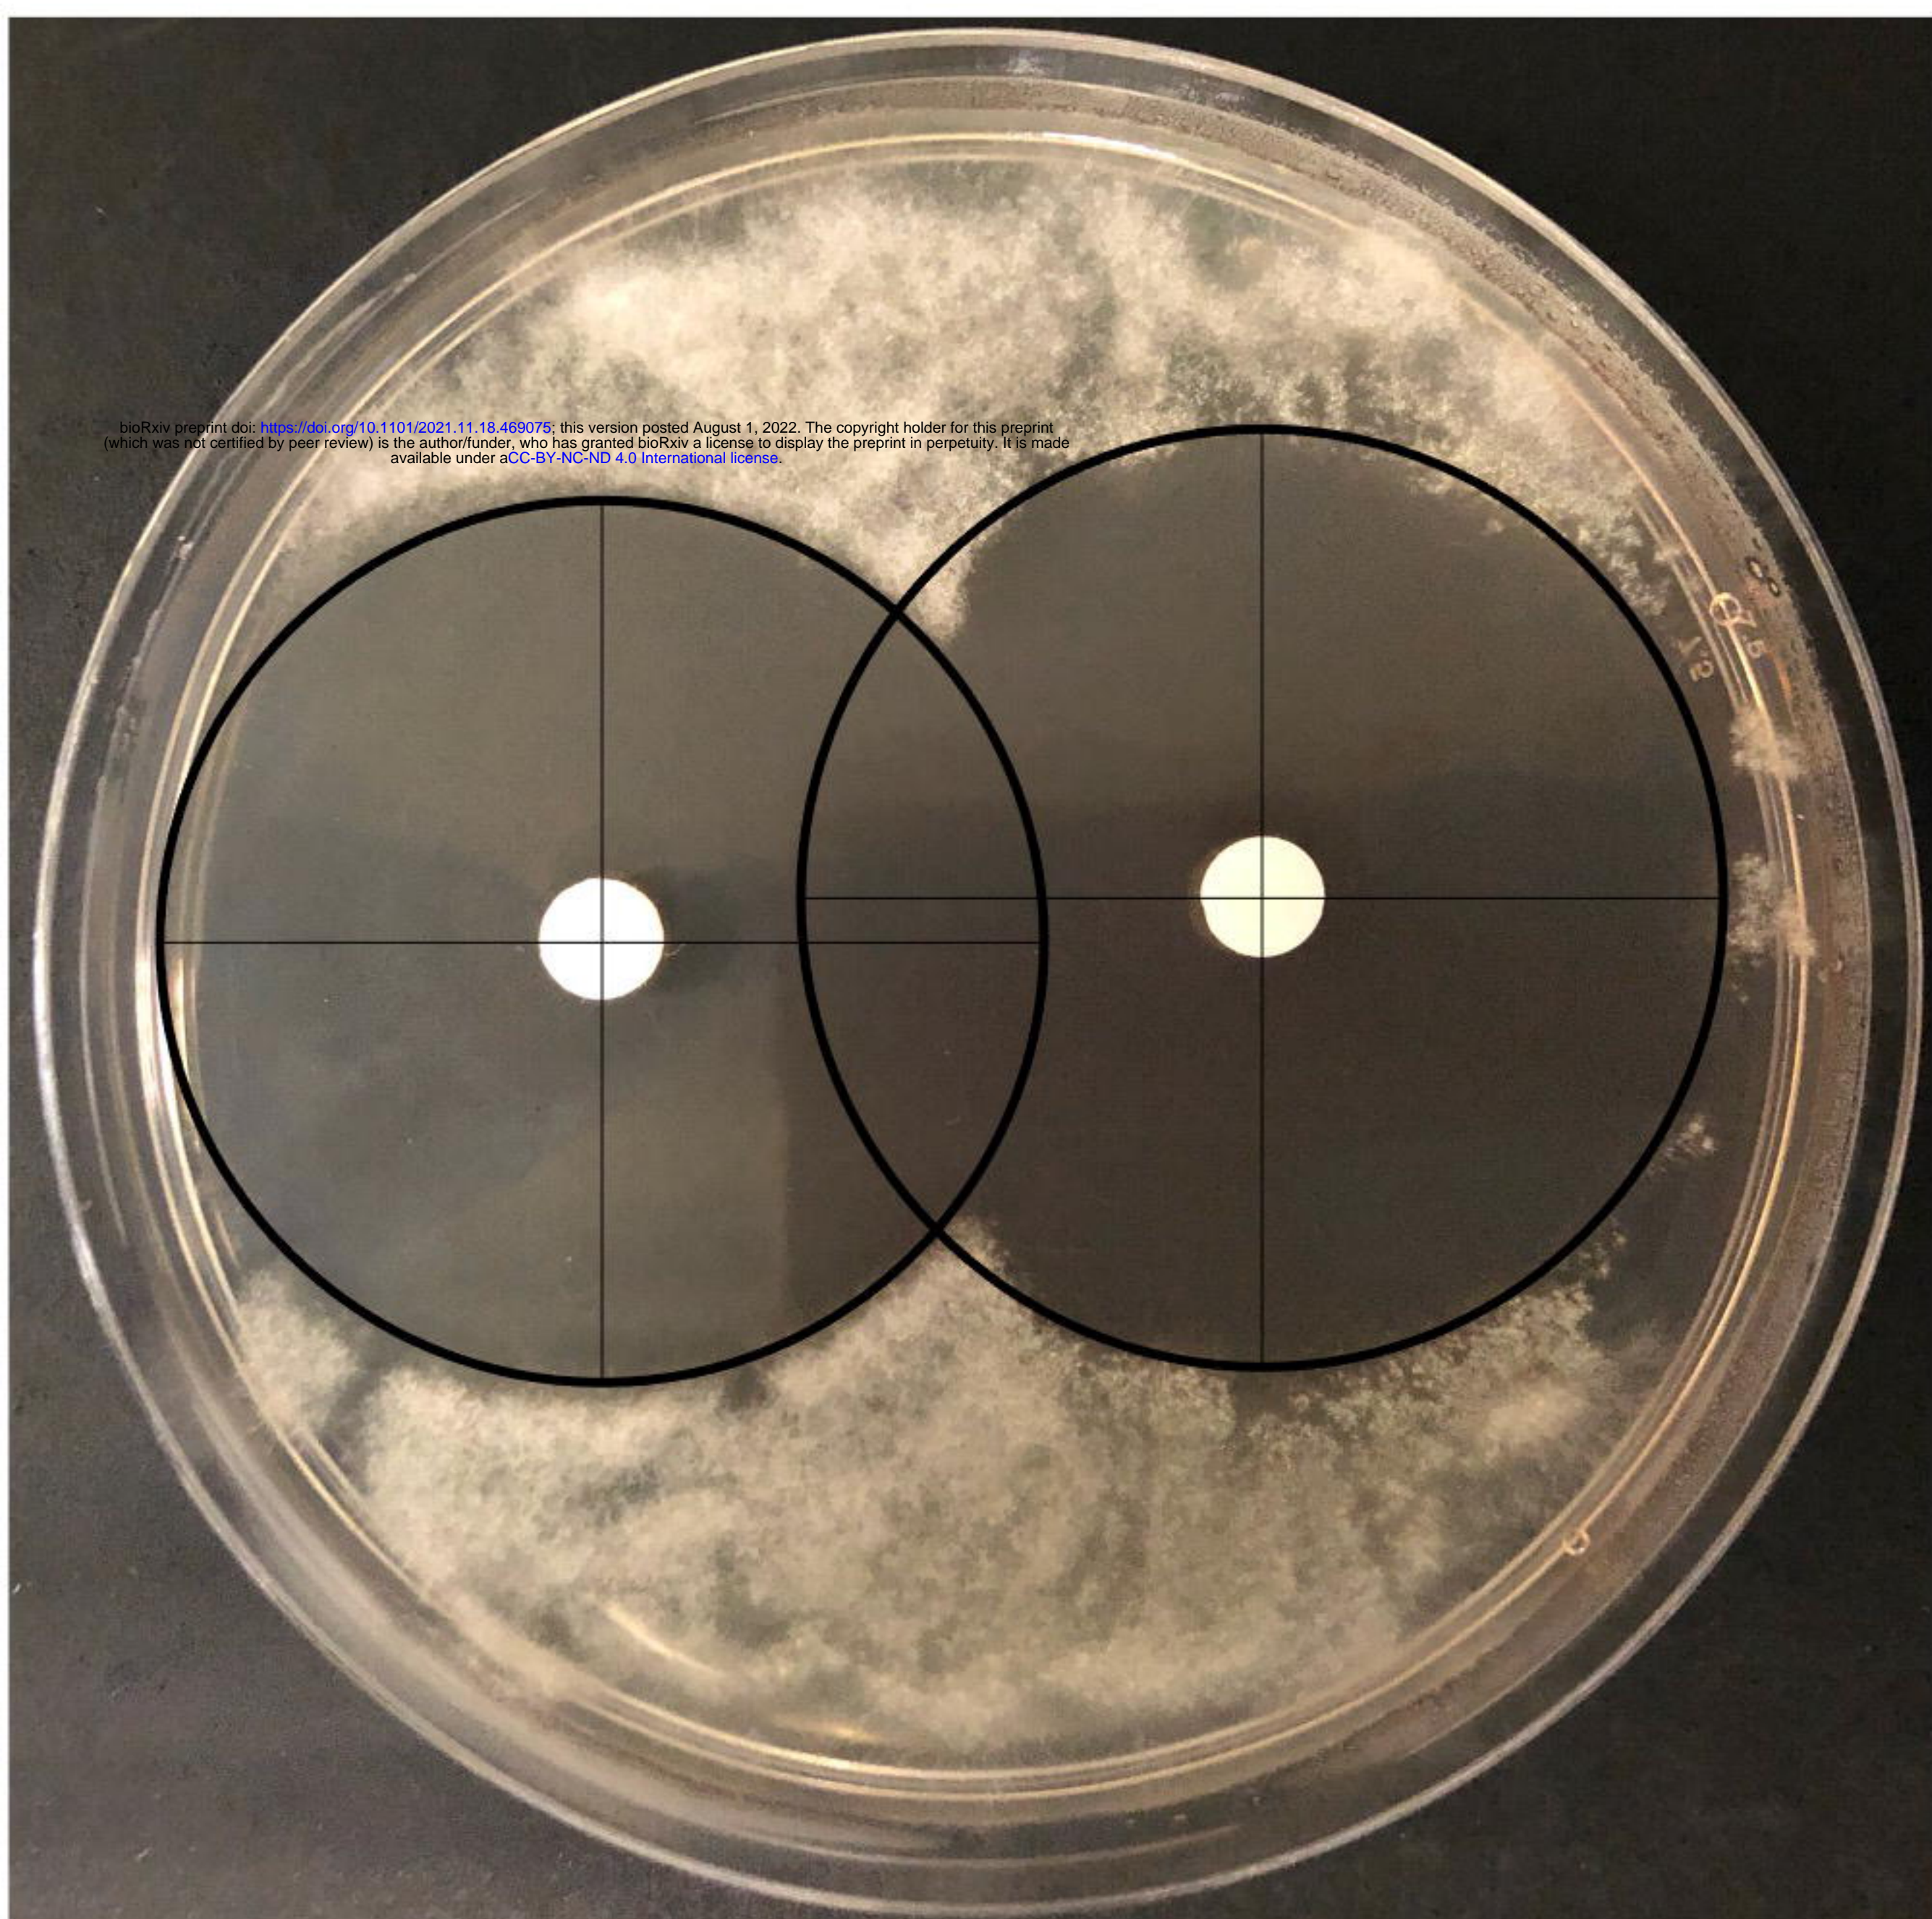

*$\Delta devR$*

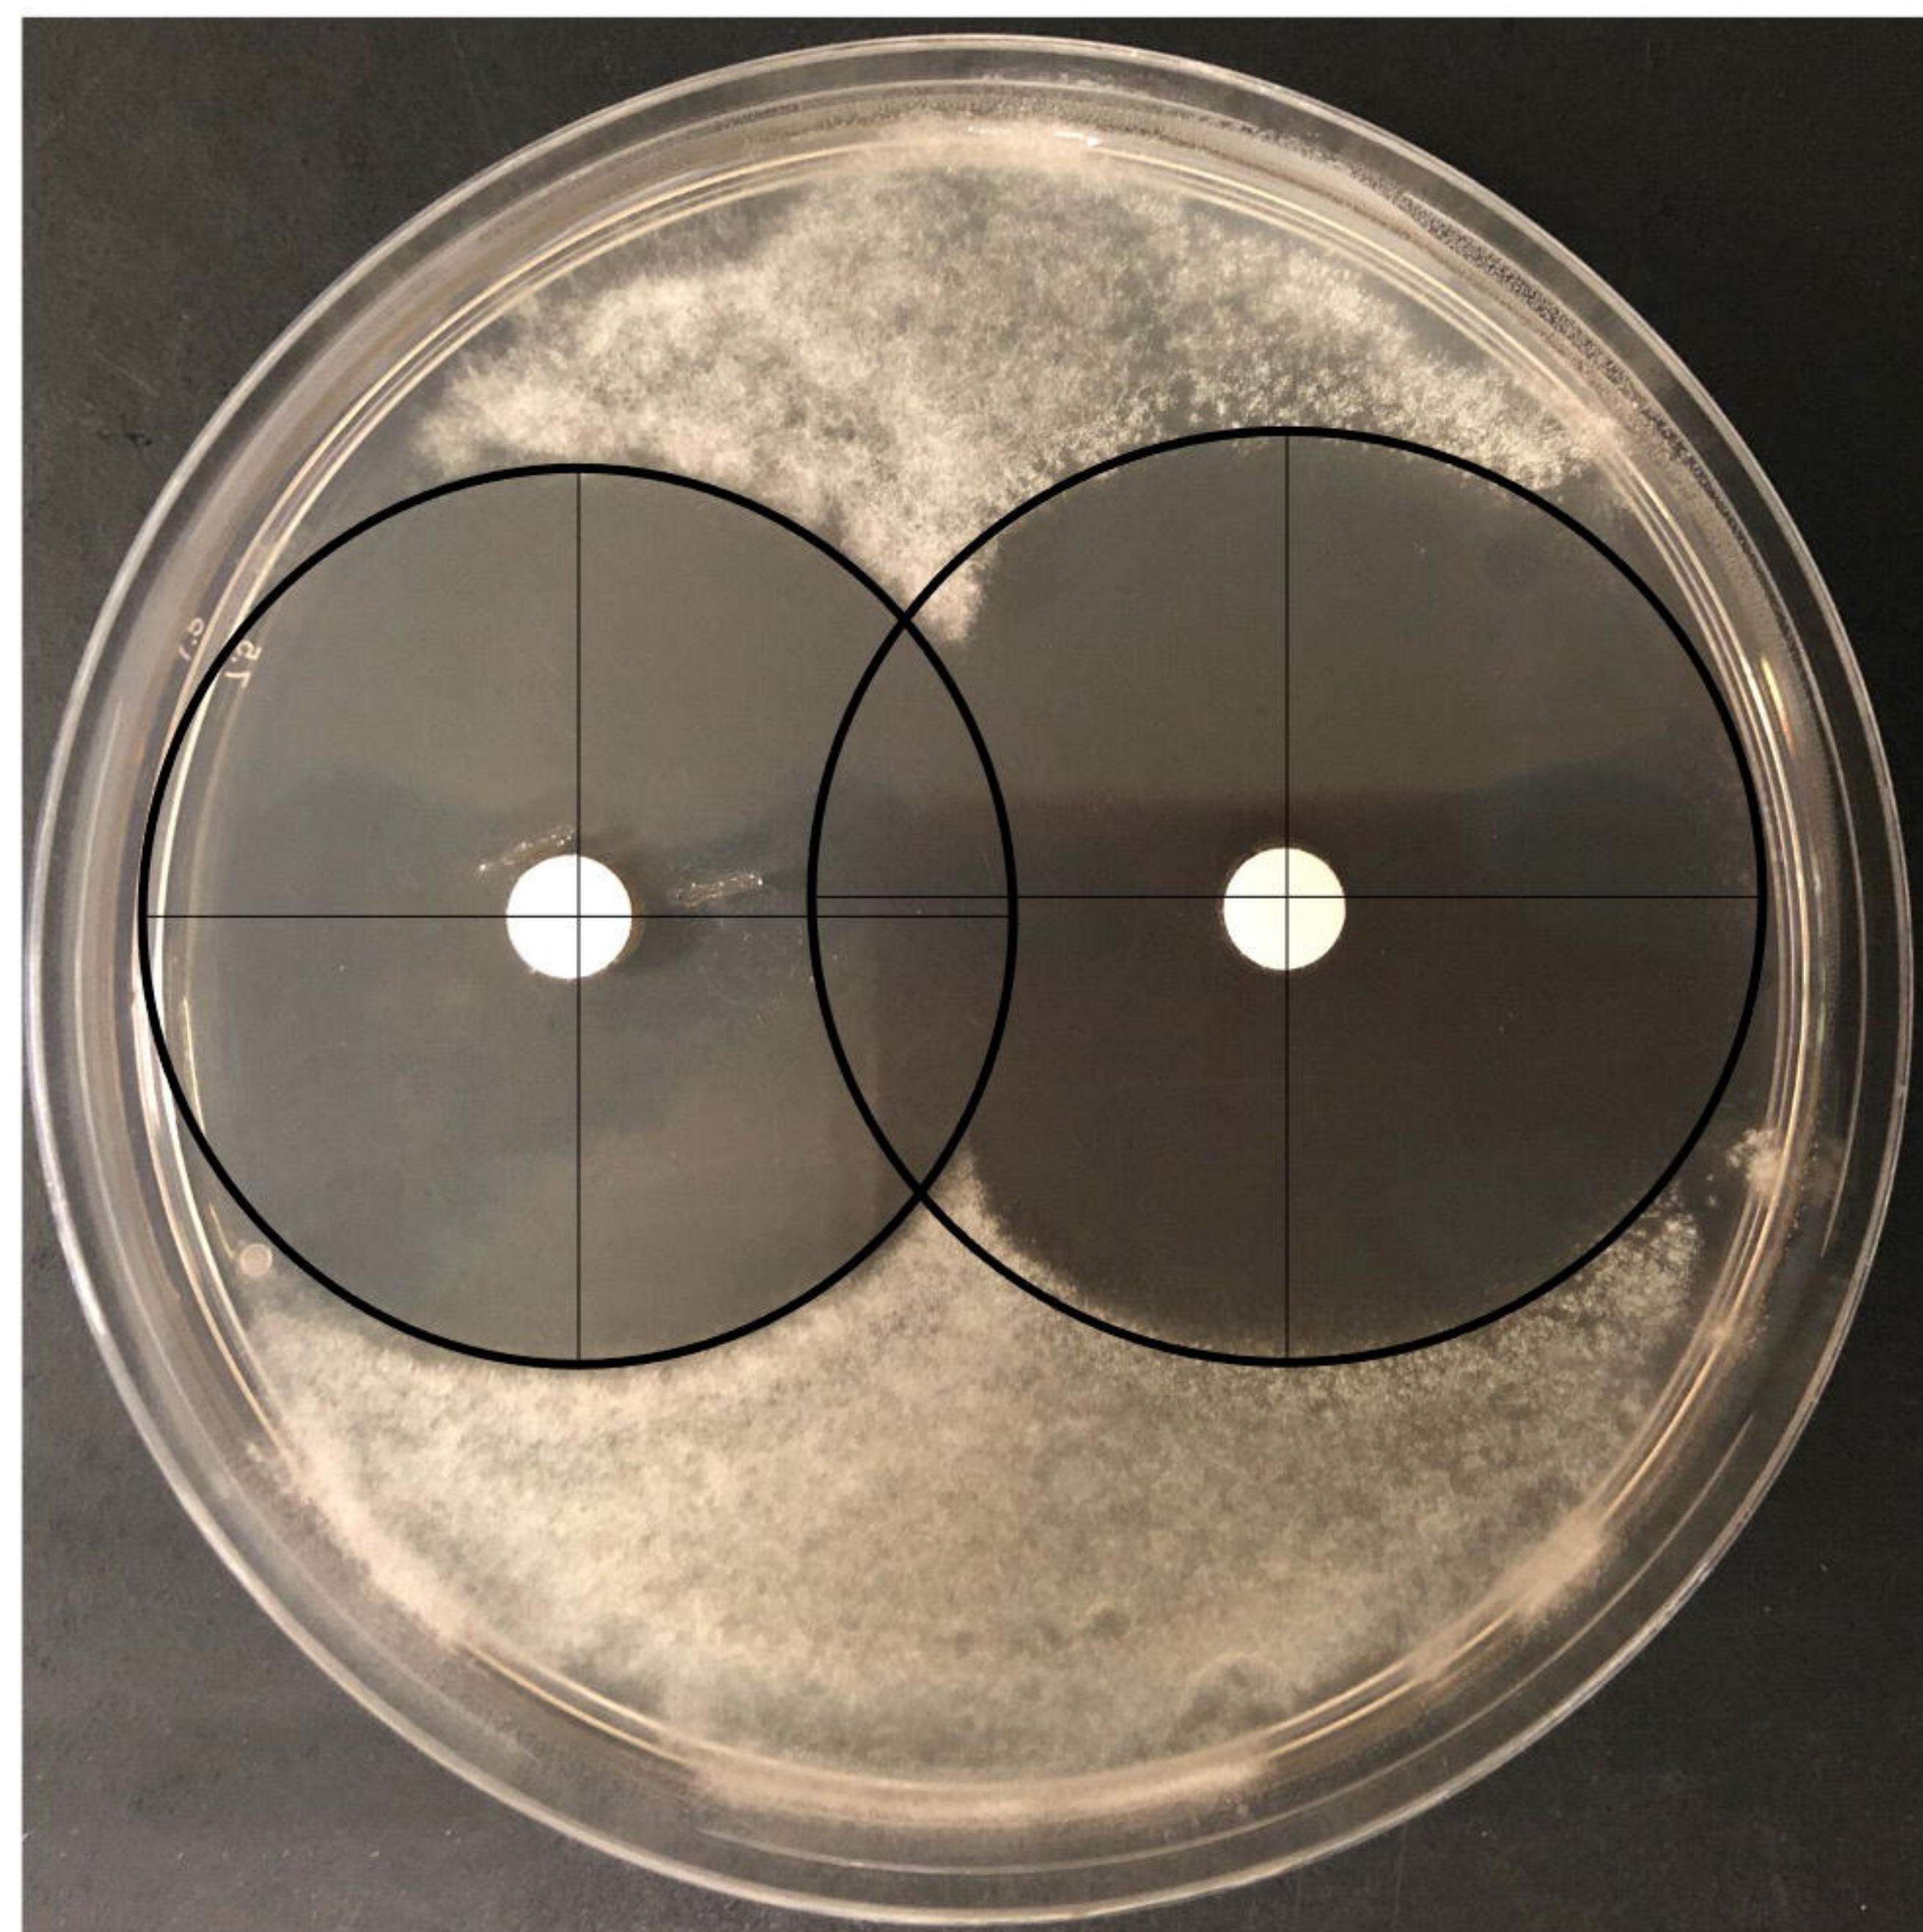



**(a)**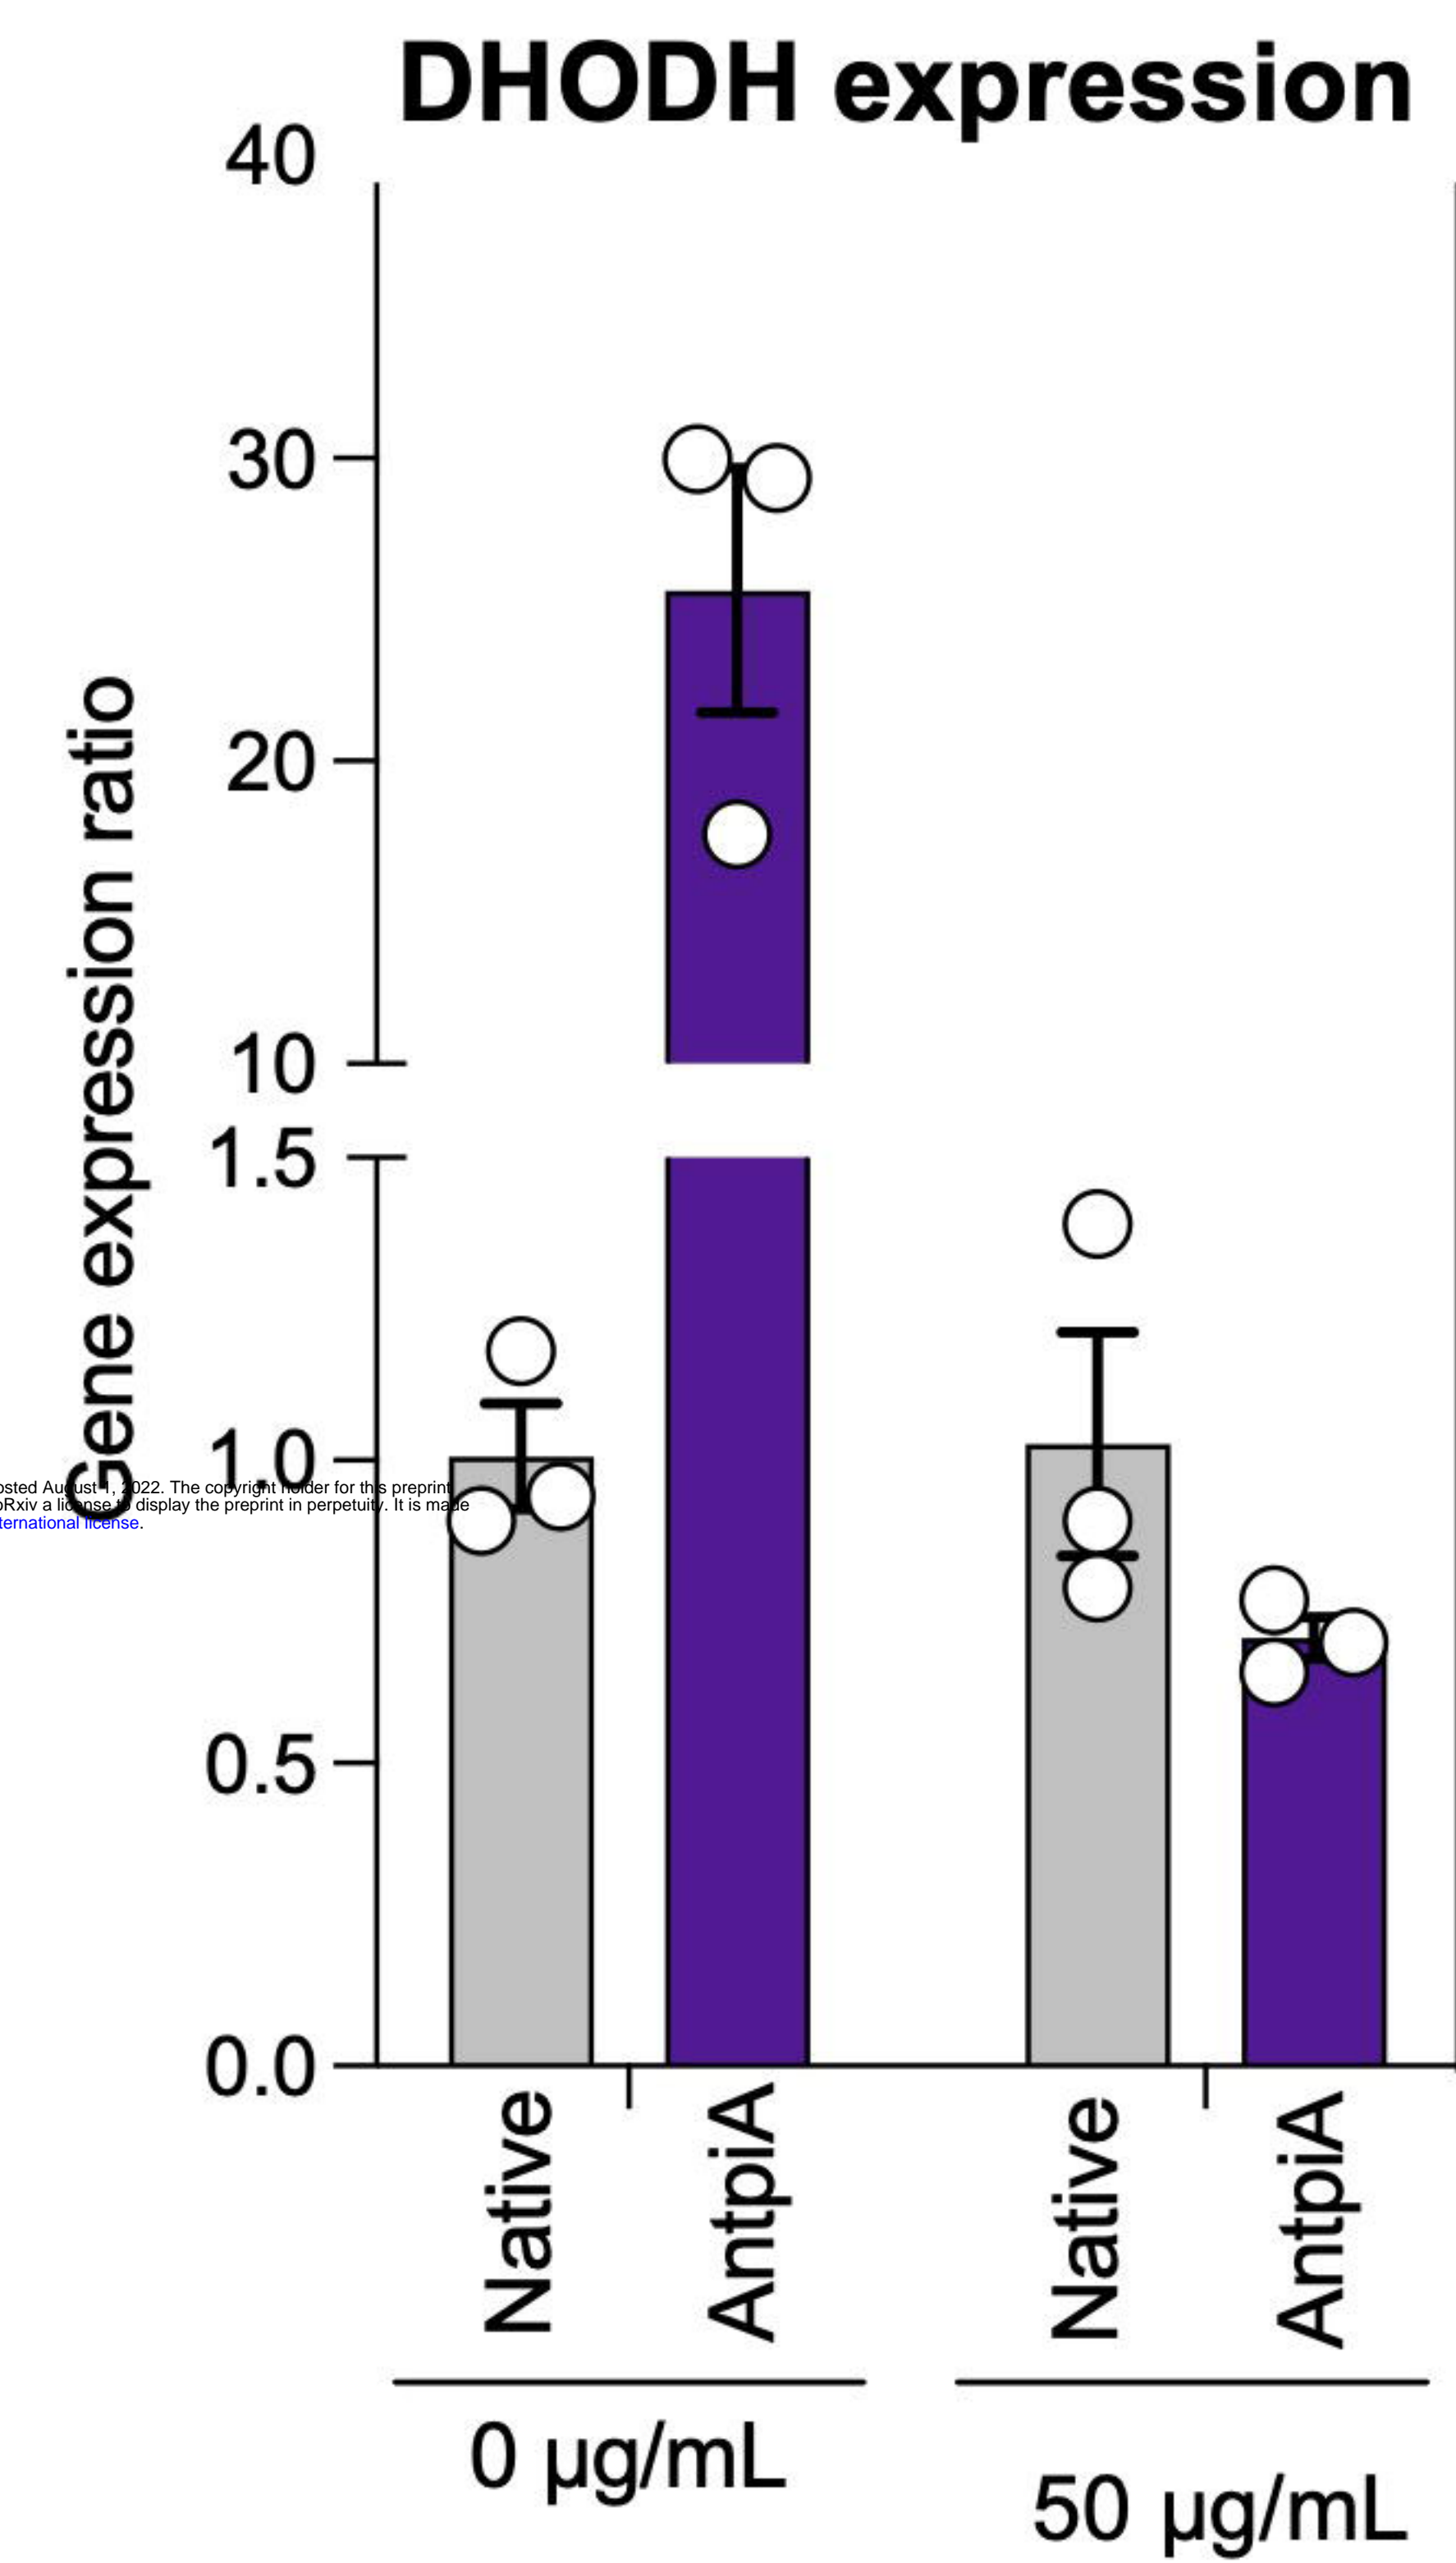**(b)**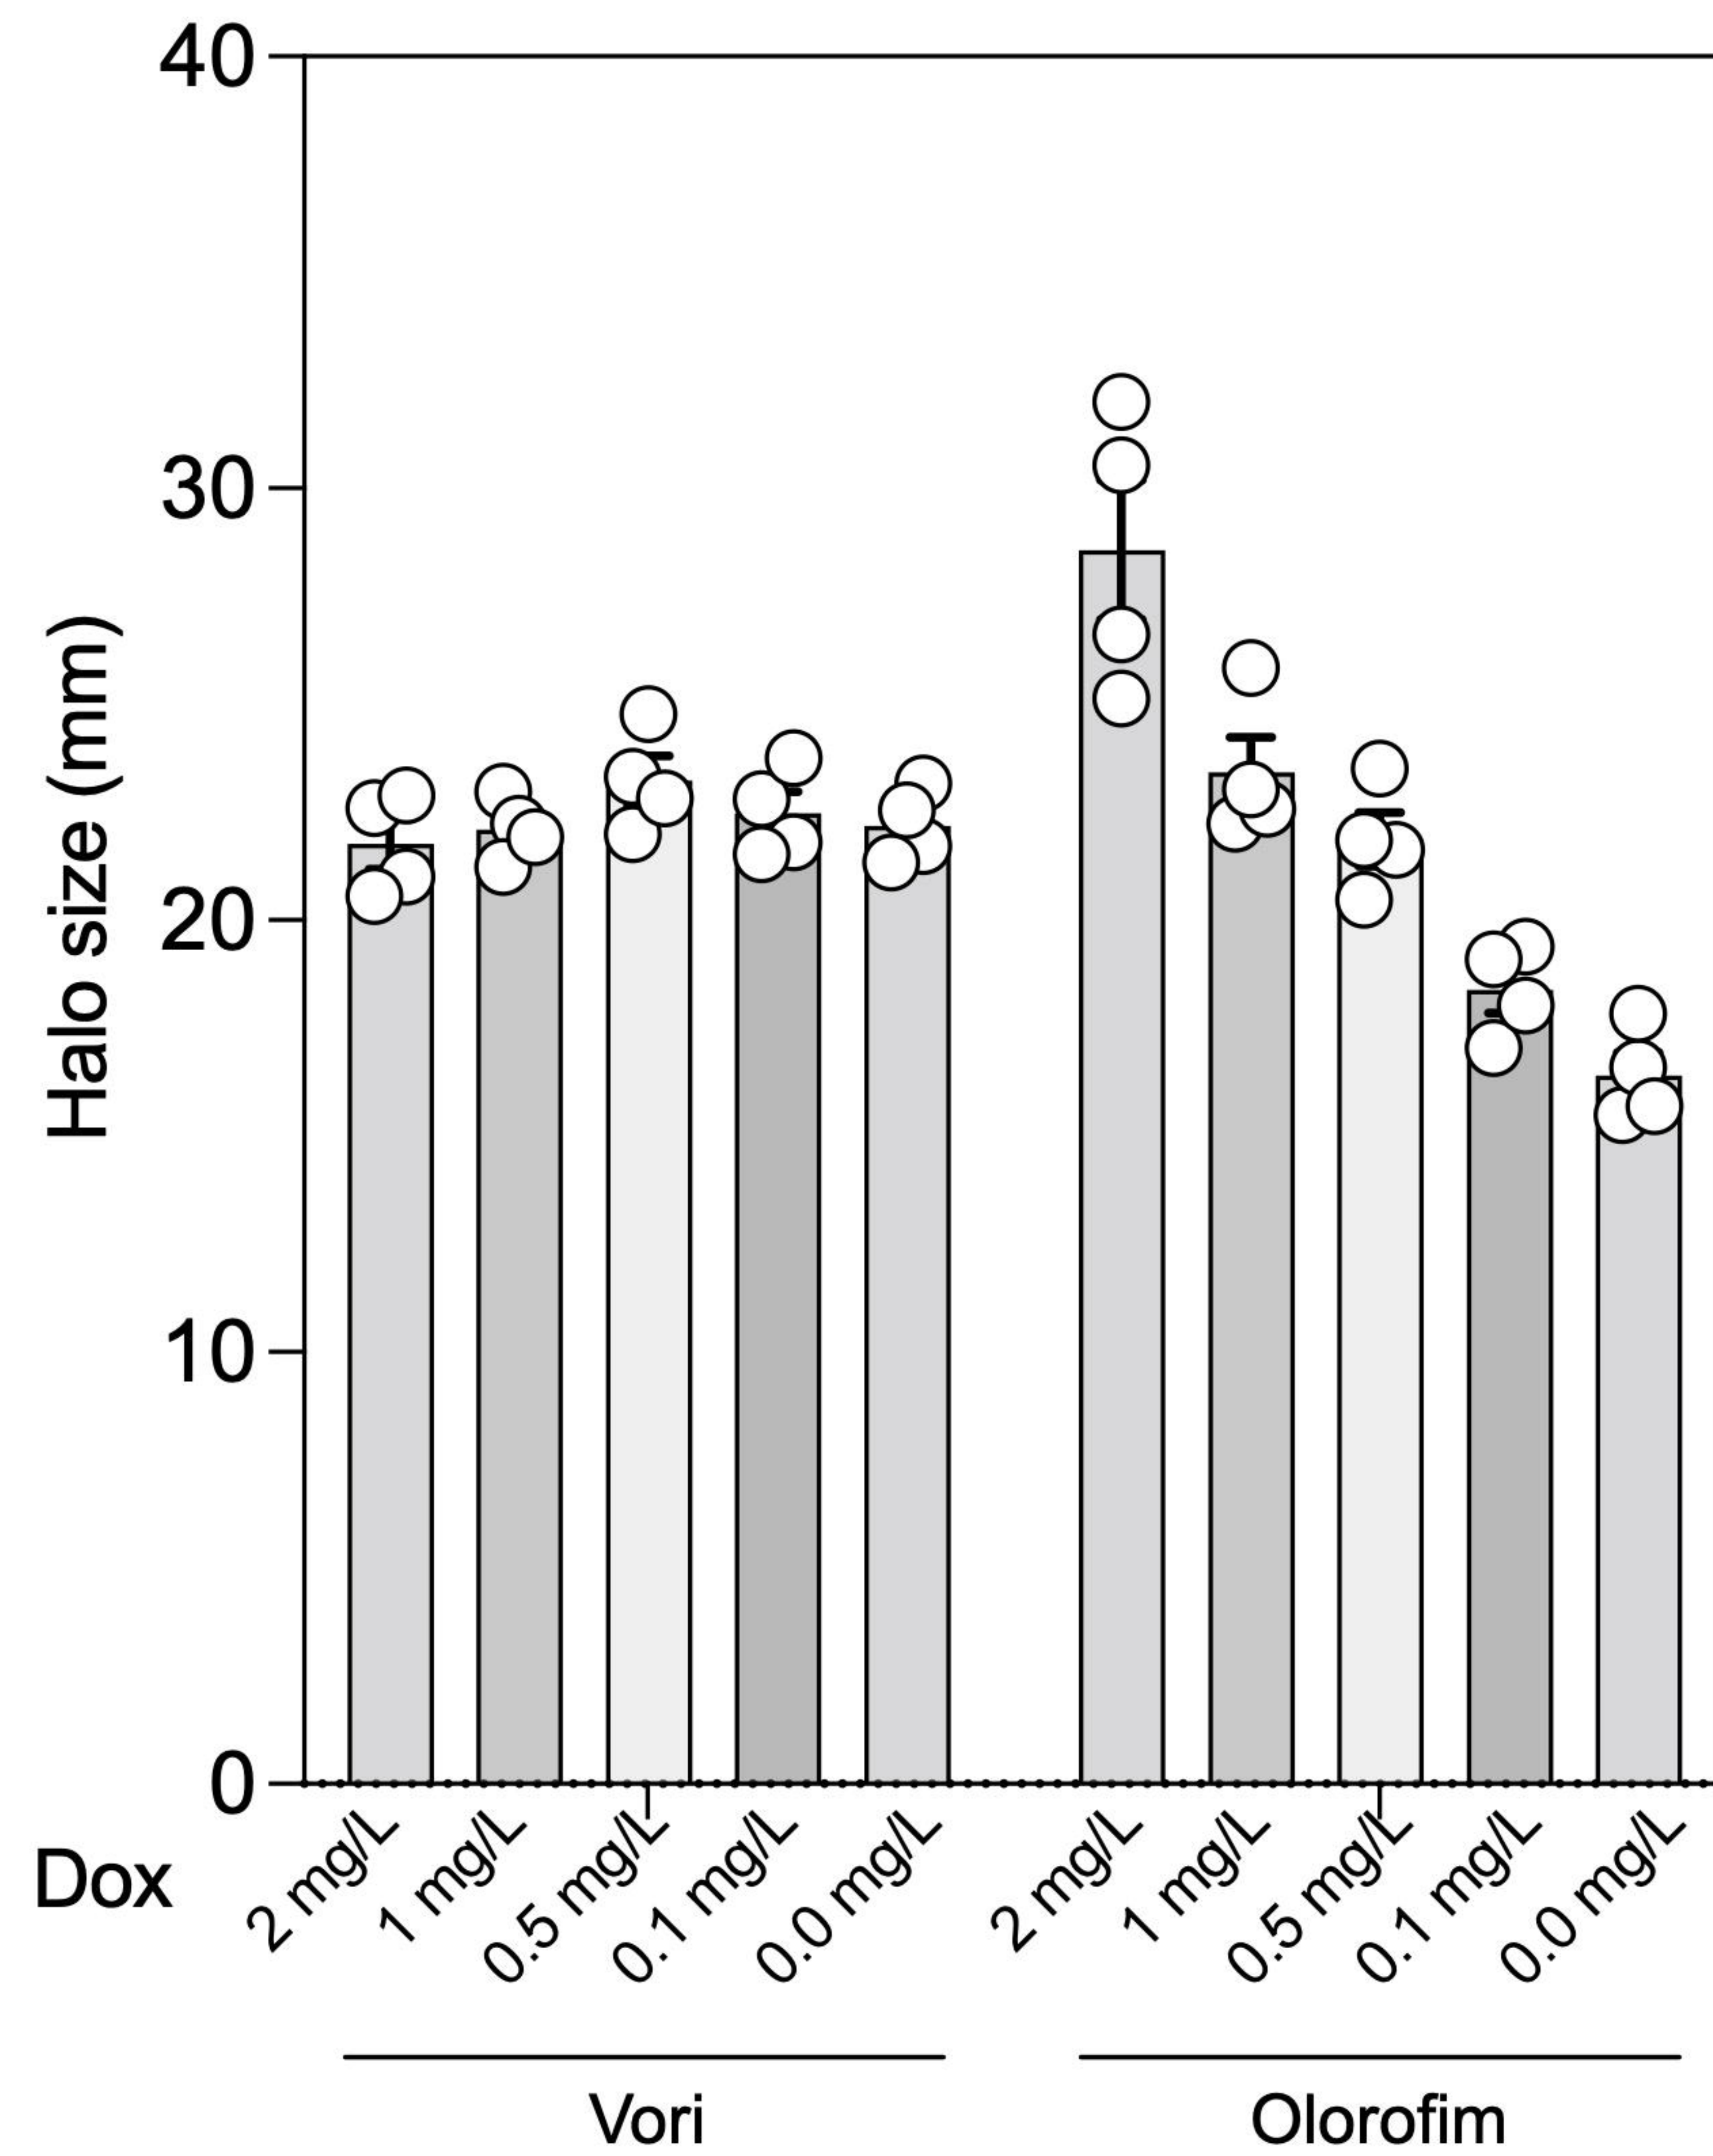**(c)**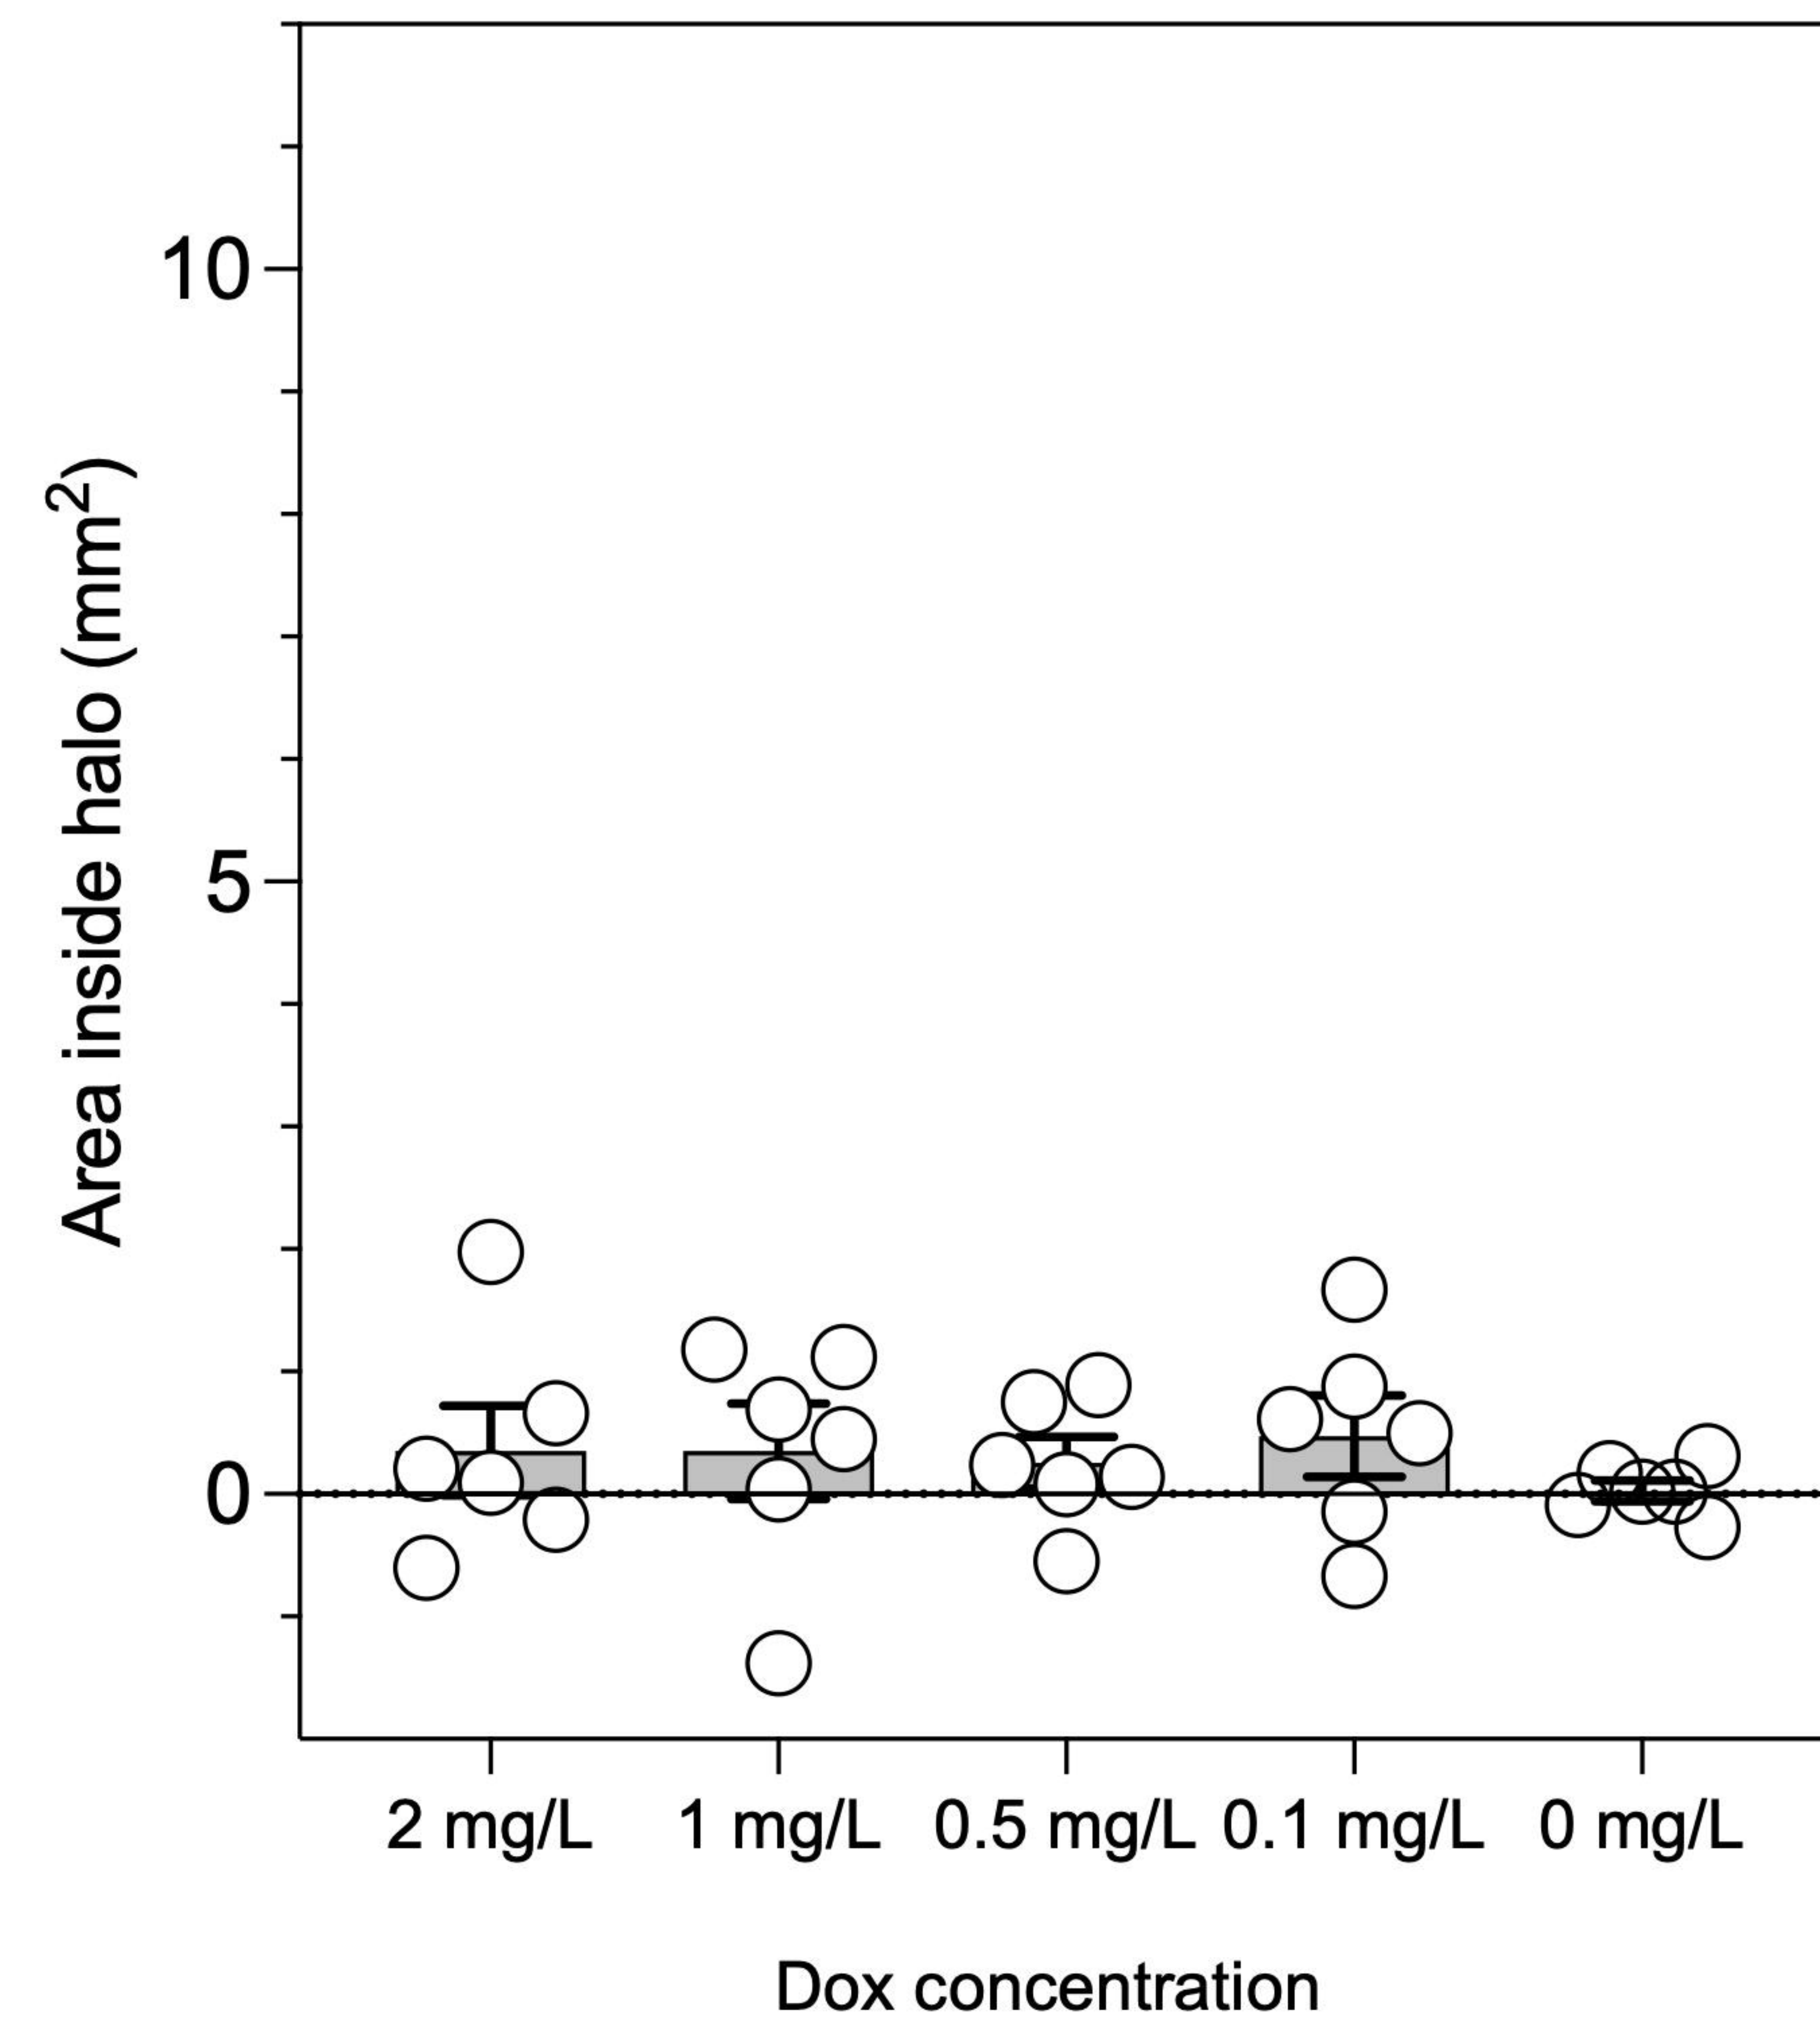

Source: https://www.biorxiv.org/content/10.1101/2021.11.18.469075v2.full.pdf
